# Supplementary material
Source: PubMed Central journal article supplement (PMC5422823)
Supplement: pnas.1620458114.sd01.pdf [file pnas.1620458114.sd01.pdf]

**SUPPLEMENTAL TABLE-1: HYPOXIA**

| <b>S.No.</b> | <b>Gene_symbol</b> | <b>Log fold change</b> |
|--------------|--------------------|------------------------|
| 1            | Ptx3               | 4.33                   |
| 2            | Tnnt2              | 3.77                   |
| 3            | Ccl2               | 3.53                   |
| 4            | Sprr1a             | 3.48                   |
| 5            | Mt2A               | 3.46                   |
| 6            | Cxcl1              | 3.31                   |
| 7            | Upk3a              | 3.25                   |
| 8            | Il6                | 3.22                   |
| 9            | Mt1a               | 3.15                   |
| 10           | Upk2               | 3.04                   |
| 11           | Upk1a              | 3.02                   |
| 12           | Cxcl2              | 2.99                   |
| 13           | Krt5               | 2.82                   |
| 14           | Cd209b             | 2.77                   |
| 15           | Il1r2              | 2.64                   |
| 16           | Marco              | 2.62                   |
| 17           | Ucp1               | 2.61                   |
| 18           | Lcn2               | 2.58                   |
| 19           | Ccl7               | 2.42                   |
| 20           | Cxcl3              | 2.4                    |
| 21           | Cxcl5              | 2.36                   |
| 22           | Krt18              | 2.29                   |
| 23           | Myl2               | 2.27                   |
| 24           | Nos2               | 2.23                   |
| 25           | Krt19              | 2.16                   |
| 26           | Olr1               | 2.08                   |
| 27           | Pglyrp1            | 2.05                   |
| 28           | Krt15              | 2.05                   |
| 29           | Csf3               | 2.05                   |
| 30           | Serpine1           | 2.04                   |
| 31           | Rnd1               | 2.01                   |
| 32           | Tnnt1              | 1.98                   |
| 33           | Tnnt1              | 1.98                   |
| 34           | Tnnt1              | 1.97                   |
| 35           | Tnnt1              | 1.97                   |

|    |            |      |
|----|------------|------|
| 36 | Hmox1      | 1.97 |
| 37 | Ns5atp9    | 1.96 |
| 38 | Prok2      | 1.9  |
| 39 | Ccl11      | 1.9  |
| 40 | Mb         | 1.87 |
| 41 | Sptssb     | 1.86 |
| 42 | Atf3       | 1.86 |
| 43 | Tnni1      | 1.86 |
| 44 | S100a8     | 1.84 |
| 45 | Aqp3       | 1.84 |
| 46 | Rn5-8s     | 1.83 |
| 47 | Rn5-8s     | 1.83 |
| 48 | Sptssb     | 1.83 |
| 49 | Rn5-8s     | 1.83 |
| 50 | Rn5-8s     | 1.83 |
| 51 | Rn5-8s     | 1.83 |
| 52 | Trem1      | 1.83 |
| 53 | Rn5-8s     | 1.83 |
| 54 | Rn5-8s     | 1.82 |
| 55 | Il1b       | 1.8  |
| 56 | Prok2      | 1.76 |
| 57 | Ccl3       | 1.76 |
| 58 | Tnnc1      | 1.75 |
| 59 | Adamts1    | 1.73 |
| 60 | Socs3      | 1.72 |
| 61 | S100a9     | 1.71 |
| 62 | Upk1b      | 1.7  |
| 63 | Krt8       | 1.69 |
| 64 | Slc17a7    | 1.67 |
| 65 | Tnfaip6    | 1.67 |
| 66 | Egr1       | 1.67 |
| 67 | Cck        | 1.64 |
| 68 | RGD1565374 | 1.57 |
| 69 | Ccrn4l     | 1.56 |
| 70 | Epcam      | 1.54 |
| 71 | Fabp3      | 1.53 |
| 72 | Ms4a1      | 1.52 |
| 73 | Glycam1    | 1.51 |
| 74 | Thbs1      | 1.47 |

|     |           |      |
|-----|-----------|------|
| 75  | Fgf16     | 1.47 |
| 76  | Csf2rb    | 1.45 |
| 77  | Arid5a    | 1.41 |
| 78  | Irf4      | 1.41 |
| 79  | Ptgds     | 1.4  |
| 80  | Cyr61     | 1.4  |
| 81  | Hspa1a    | 1.39 |
| 82  | Hspa1l    | 1.39 |
| 83  | Phlda1    | 1.39 |
| 84  | Slc27a2   | 1.37 |
| 85  | Apold1    | 1.37 |
| 86  | Nr4a1     | 1.37 |
| 87  | Cyp2b1    | 1.34 |
| 88  | Hp        | 1.33 |
| 89  | Mbp       | 1.33 |
| 90  | Mbp       | 1.33 |
| 91  | Mbp       | 1.33 |
| 92  | Mbp       | 1.33 |
| 93  | Cyp2e1    | 1.32 |
| 94  | Mbp       | 1.32 |
| 95  | Cpt1b     | 1.3  |
| 96  | Spp1      | 1.3  |
| 97  | Gmpr      | 1.29 |
| 98  | Cebpd     | 1.28 |
| 99  | Cox8b     | 1.26 |
| 100 | Hspa1b    | 1.24 |
| 101 | Slpi      | 1.23 |
| 102 | Hmgcs2    | 1.23 |
| 103 | Rbm3      | 1.23 |
| 104 | Cebpb     | 1.21 |
| 105 | Clec4e    | 1.2  |
| 106 | Serpina3n | 1.2  |
| 107 | Adm       | 1.19 |
| 108 | Ehhadh    | 1.18 |
| 109 | Tfpi2     | 1.17 |
| 110 | Mir671    | 1.17 |
| 111 | Cidea     | 1.17 |
| 112 | Ltb       | 1.16 |
| 113 | Mir147    | 1.16 |

|     |           |      |
|-----|-----------|------|
| 114 | Junb      | 1.16 |
| 115 | Slpil2    | 1.15 |
| 116 | Nfkbiz    | 1.15 |
| 117 | Mobp      | 1.14 |
| 118 | Fgl2      | 1.13 |
| 119 | Rgs1      | 1.13 |
| 120 | Plip      | 1.13 |
| 121 | Cyp2c11   | 1.12 |
| 122 | Hpca      | 1.12 |
| 123 | Akr1cl    | 1.12 |
| 124 | F2rl2     | 1.11 |
| 125 | Mbp       | 1.11 |
| 126 | Nupr1     | 1.1  |
| 127 | Nupr1     | 1.1  |
| 128 | Csrp2     | 1.1  |
| 129 | Maff      | 1.1  |
| 130 | Tmem158   | 1.1  |
| 131 | Ramp3     | 1.1  |
| 132 | Mrgprg    | 1.06 |
| 133 | Arg1      | 1.05 |
| 134 | Ddn       | 1.05 |
| 135 | Snhg4     | 1.05 |
| 136 | Serpinb1a | 1.04 |
| 137 | Gk        | 1.03 |
| 138 | Sat1      | 1.03 |
| 139 | Cd79b     | 1.03 |
| 140 | Cntf      | 1.01 |
| 141 | MGC105649 | 1.01 |
| 142 | Cd3g      | 1.01 |
| 143 | Btg2      | 1.01 |
| 144 | Gadd45b   | 1    |
| 145 | LOC299282 | 1    |
| 146 | Edn1      | 1    |
| 147 | Acadl     | 0.99 |
| 148 | Sell      | 0.99 |
| 149 | H2afj     | 0.98 |
| 150 | H2afj     | 0.98 |
| 151 | Plin2     | 0.97 |
| 152 | Ctse      | 0.96 |

|     |            |       |
|-----|------------|-------|
| 153 | Ugdh       | 0.95  |
| 154 | LOC259244  | 0.94  |
| 155 | Cd3d       | 0.93  |
| 156 | Rbp4       | -0.93 |
| 157 | Ifit1      | -0.93 |
| 158 | Casq2      | -0.93 |
| 159 | Alg2       | -0.93 |
| 160 | Lep        | -0.93 |
| 161 | Rtkn       | -0.93 |
| 162 | LOC691921  | -0.93 |
| 163 | Nrcam      | -0.93 |
| 164 | Slc29a1    | -0.93 |
| 165 | Abcg3l1    | -0.93 |
| 166 | RGD1311805 | -0.93 |
| 167 | Brsk1      | -0.94 |
| 168 | Tubb4b     | -0.94 |
| 169 | Tcea2      | -0.94 |
| 170 | Agrn       | -0.94 |
| 171 | Hdac11     | -0.94 |
| 172 | Slc6a15    | -0.94 |
| 173 | Ngfrap1    | -0.94 |
| 174 | Fbxl16     | -0.94 |
| 175 | Mvk        | -0.94 |
| 176 | Cd99l2     | -0.94 |
| 177 | Ly6c       | -0.94 |
| 178 | Ly6c       | -0.94 |
| 179 | Pld3       | -0.95 |
| 180 | Maged2     | -0.95 |
| 181 | A3galt2    | -0.95 |
| 182 | Rtp4       | -0.95 |
| 183 | Lgals9     | -0.95 |
| 184 | Trappc1    | -0.95 |
| 185 | Gaa        | -0.95 |
| 186 | Scarb1     | -0.95 |
| 187 | Cd99l2     | -0.95 |
| 188 | Hk1        | -0.96 |
| 189 | RT1-CE6    | -0.96 |
| 190 | Fadd       | -0.96 |
| 191 | Syt5       | -0.96 |

|     |            |       |
|-----|------------|-------|
| 192 | Hmgcr      | -0.96 |
| 193 | Fam219a    | -0.96 |
| 194 | Maged2     | -0.96 |
| 195 | Usp18      | -0.96 |
| 196 | RGD1306151 | -0.96 |
| 197 | Steap3     | -0.96 |
| 198 | Oas1b      | -0.96 |
| 199 | Mlxipl     | -0.96 |
| 200 | Mapk3      | -0.97 |
| 201 | Gnb4       | -0.97 |
| 202 | Maged2     | -0.97 |
| 203 | Col15a1    | -0.97 |
| 204 | Tuba4a     | -0.97 |
| 205 | Adam23     | -0.97 |
| 206 | Hist3h2bb  | -0.97 |
| 207 | Idi1       | -0.97 |
| 208 | Bphl       | -0.97 |
| 209 | Tspyl4     | -0.98 |
| 210 | Apbb1      | -0.98 |
| 211 | Cacng7     | -0.98 |
| 212 | Pfn2       | -0.98 |
| 213 | Pfn2       | -0.98 |
| 214 | Rrm2b      | -0.98 |
| 215 | Slc9a9     | -0.98 |
| 216 | Kifap3     | -0.98 |
| 217 | Cpne6      | -0.98 |
| 218 | Ldb2       | -0.98 |
| 219 | Spon2      | -0.98 |
| 220 | Slc38a7    | -0.98 |
| 221 | RGD1312005 | -0.98 |
| 222 | Prnp       | -0.99 |
| 223 | Clcn6      | -0.99 |
| 224 | Gdap1      | -0.99 |
| 225 | Ebp        | -0.99 |
| 226 | Oasl2      | -0.99 |
| 227 | Fabp5      | -1    |
| 228 | Amigo1     | -1    |
| 229 | Asb1       | -1    |
| 230 | Ppp2r2c    | -1    |

|     |            |       |
|-----|------------|-------|
| 231 | Nrsn1      | -1    |
| 232 | Baspl1     | -1.01 |
| 233 | Hey1       | -1.01 |
| 234 | Sms        | -1.01 |
| 235 | Dpysl2     | -1.01 |
| 236 | Map6       | -1.02 |
| 237 | Atp13a2    | -1.02 |
| 238 | Usp5       | -1.02 |
| 239 | Add2       | -1.02 |
| 240 | Pygl       | -1.02 |
| 241 | Dhx58      | -1.02 |
| 242 | Grifin     | -1.02 |
| 243 | Lrpap1     | -1.02 |
| 244 | Susd2      | -1.03 |
| 245 | Gpr137     | -1.03 |
| 246 | Irf7       | -1.03 |
| 247 | Arhgap28   | -1.03 |
| 248 | RGD1562618 | -1.03 |
| 249 | Apod       | -1.03 |
| 250 | Itgb4      | -1.03 |
| 251 | Myh8       | -1.03 |
| 252 | Gdpd1      | -1.03 |
| 253 | Cdh19      | -1.03 |
| 254 | Myoc       | -1.03 |
| 255 | Rgd1310049 | -1.04 |
| 256 | Fads1      | -1.04 |
| 257 | Mfsd12     | -1.04 |
| 258 | Tmem150c   | -1.04 |
| 259 | Uros       | -1.05 |
| 260 | Fndc1      | -1.05 |
| 261 | Add2       | -1.05 |
| 262 | Socs2      | -1.05 |
| 263 | Emr1       | -1.05 |
| 264 | Reep2      | -1.05 |
| 265 | Ctxn3      | -1.05 |
| 266 | Fbxo44     | -1.06 |
| 267 | Tnk2       | -1.06 |
| 268 | Lgals3bp   | -1.06 |
| 269 | Lrrc4b     | -1.07 |

|     |           |       |
|-----|-----------|-------|
| 270 | Ttl       | -1.07 |
| 271 | Ptpr      | -1.07 |
| 272 | Mgat3     | -1.07 |
| 273 | Akap6     | -1.07 |
| 274 | Sep-06    | -1.07 |
| 275 | Rimbp2    | -1.07 |
| 276 | Mir6321   | -1.07 |
| 277 | Ankrd29   | -1.07 |
| 278 | Snurf     | -1.08 |
| 279 | Kif1b     | -1.08 |
| 280 | Dos       | -1.08 |
| 281 | Ttc8      | -1.08 |
| 282 | MGC116197 | -1.08 |
| 283 | Sfrp4     | -1.08 |
| 284 | Atp6v1b2  | -1.08 |
| 285 | Pcdhac2   | -1.08 |
| 286 | Tm7sf2    | -1.09 |
| 287 | Snurf     | -1.09 |
| 288 | Fam69b    | -1.09 |
| 289 | Ptpr      | -1.09 |
| 290 | Pcp2      | -1.09 |
| 291 | Parva     | -1.1  |
| 292 | Arhgef28  | -1.1  |
| 293 | Mab2111   | -1.1  |
| 294 | Fam189b   | -1.1  |
| 295 | Them6     | -1.1  |
| 296 | Map2      | -1.1  |
| 297 | Nid2      | -1.1  |
| 298 | Zdhhc2    | -1.1  |
| 299 | LOC363337 | -1.1  |
| 300 | Egfl8     | -1.11 |
| 301 | Tmx2      | -1.11 |
| 302 | Kif5c     | -1.11 |
| 303 | Pik3r1    | -1.11 |
| 304 | Map1b     | -1.11 |
| 305 | Ankrd6    | -1.11 |
| 306 | Acsbg1    | -1.11 |
| 307 | Snrpn     | -1.12 |
| 308 | Sbsn      | -1.12 |



|     |            |       |
|-----|------------|-------|
| 309 | Tango2     | -1.12 |
| 310 | P2rx2      | -1.12 |
| 311 | Grtp1      | -1.12 |
| 312 | Egfl8      | -1.13 |
| 313 | Nrip3      | -1.13 |
| 314 | Tuba3b     | -1.13 |
| 315 | Astn1      | -1.13 |
| 316 | Vstm4      | -1.13 |
| 317 | Angpt2     | -1.13 |
| 318 | Grtp1      | -1.13 |
| 319 | Slc35f1    | -1.14 |
| 320 | Aplp1      | -1.14 |
| 321 | Phactr3    | -1.14 |
| 322 | Olfm1      | -1.14 |
| 323 | Ifi27l2b   | -1.14 |
| 324 | Kif3a      | -1.14 |
| 325 | Tmem59l    | -1.14 |
| 326 | Npy        | -1.15 |
| 327 | Npy        | -1.15 |
| 328 | Egln3      | -1.15 |
| 329 | Adap1      | -1.15 |
| 330 | Mapk10     | -1.15 |
| 331 | Arl10      | -1.15 |
| 332 | Ppp2r5b    | -1.16 |
| 333 | Ppp2r5b    | -1.16 |
| 334 | Tmem176b   | -1.16 |
| 335 | Tmem176b   | -1.16 |
| 336 | Wdr6       | -1.16 |
| 337 | Sc5d       | -1.16 |
| 338 | Gnb5       | -1.16 |
| 339 | RGD1310110 | -1.16 |
| 340 | Fam46c     | -1.17 |
| 341 | Tmem176b   | -1.17 |
| 342 | Mfsd6      | -1.17 |
| 343 | Slc36a1    | -1.17 |
| 344 | Angptl1    | -1.17 |
| 345 | Mapk10     | -1.17 |
| 346 | Tuba1c     | -1.18 |
| 347 | Tmem176b   | -1.18 |

|     |              |       |
|-----|--------------|-------|
| 348 | Tmem176b     | -1.18 |
| 349 | Tmem176b     | -1.18 |
| 350 | Tmem176b     | -1.18 |
| 351 | Ece2         | -1.18 |
| 352 | Tmem107      | -1.18 |
| 353 | Doc2b        | -1.18 |
| 354 | S1pr3        | -1.18 |
| 355 | Elovl2       | -1.18 |
| 356 | Rab3a        | -1.18 |
| 357 | Gnas         | -1.19 |
| 358 | Snap91       | -1.19 |
| 359 | Cacnb3       | -1.19 |
| 360 | Fcer1a       | -1.19 |
| 361 | Dok2         | -1.19 |
| 362 | Clip3        | -1.2  |
| 363 | Clip3        | -1.2  |
| 364 | Cdh6         | -1.2  |
| 365 | Hspa4l       | -1.2  |
| 366 | Atp6v0e2     | -1.2  |
| 367 | Abca8a       | -1.2  |
| 368 | Myh4         | -1.2  |
| 369 | Cplx1        | -1.2  |
| 370 | Sbsn         | -1.21 |
| 371 | Nradd        | -1.21 |
| 372 | Sez6l2       | -1.22 |
| 373 | Prkacb       | -1.22 |
| 374 | Ctnna2       | -1.22 |
| 375 | Jph4         | -1.22 |
| 376 | Arhgap22     | -1.22 |
| 377 | Magee1       | -1.23 |
| 378 | LOC691995    | -1.23 |
| 379 | Ifi47        | -1.23 |
| 380 | Slc25a10     | -1.23 |
| 381 | Stmn4        | -1.23 |
| 382 | Tspan17      | -1.23 |
| 383 | Olr63        | -1.24 |
| 384 | Slc2a6       | -1.24 |
| 385 | LOC100912292 | -1.24 |
| 386 | Trpv2        | -1.24 |

|     |          |       |
|-----|----------|-------|
| 387 | Trpv2    | -1.24 |
| 388 | Trpv2    | -1.24 |
| 389 | Atp6v1g2 | -1.25 |
| 390 | Scd      | -1.25 |
| 391 | Snap25   | -1.25 |
| 392 | Ncam1    | -1.25 |
| 393 | Stmn4    | -1.25 |
| 394 | Stmn4    | -1.25 |
| 395 | Stmn4    | -1.25 |
| 396 | Tuba1b   | -1.26 |
| 397 | Srebf1   | -1.26 |
| 398 | Stmn4    | -1.26 |
| 399 | Nt5dc2   | -1.26 |
| 400 | Apba2    | -1.27 |
| 401 | C6       | -1.27 |
| 402 | Srebf1   | -1.27 |
| 403 | Stmn4    | -1.27 |
| 404 | Lgi3     | -1.27 |
| 405 | Ggt7     | -1.28 |
| 406 | Ncs1     | -1.28 |
| 407 | Snap25   | -1.28 |
| 408 | Snap25   | -1.28 |
| 409 | Mrap2    | -1.28 |
| 410 | Sctr     | -1.28 |
| 411 | Pcbd1    | -1.29 |
| 412 | Gpam     | -1.29 |
| 413 | Stk32c   | -1.29 |
| 414 | Rtn2     | -1.29 |
| 415 | Stxbp1   | -1.29 |
| 416 | Kif3c    | -1.29 |
| 417 | Scg3     | -1.29 |
| 418 | Uba7     | -1.29 |
| 419 | Slc1a4   | -1.29 |
| 420 | Dnajc6   | -1.3  |
| 421 | Cilp     | -1.3  |
| 422 | Susd4    | -1.3  |
| 423 | Tecr     | -1.3  |
| 424 | Caly     | -1.31 |
| 425 | Caly     | -1.31 |

|     |           |       |
|-----|-----------|-------|
| 426 | Map1a     | -1.31 |
| 427 | Klc1      | -1.31 |
| 428 | Tuba1a    | -1.31 |
| 429 | Acaca     | -1.31 |
| 430 | Pcyox1l   | -1.31 |
| 431 | Sbsn      | -1.32 |
| 432 | Snhg11    | -1.32 |
| 433 | Enpep     | -1.32 |
| 434 | Dgkb      | -1.32 |
| 435 | Klc1      | -1.32 |
| 436 | Klc1      | -1.32 |
| 437 | Ddx25     | -1.32 |
| 438 | Chgb      | -1.33 |
| 439 | Nrn1      | -1.33 |
| 440 | Bex4      | -1.33 |
| 441 | Lss       | -1.34 |
| 442 | Spock2    | -1.34 |
| 443 | Slc22a3   | -1.34 |
| 444 | Fdps      | -1.34 |
| 445 | Atp1b1    | -1.34 |
| 446 | Rab33a    | -1.35 |
| 447 | Clstn3    | -1.36 |
| 448 | Ablim2    | -1.36 |
| 449 | Msmo1     | -1.36 |
| 450 | Snx10     | -1.37 |
| 451 | Gnao1     | -1.37 |
| 452 | Fbxo2     | -1.38 |
| 453 | Ctxn1     | -1.38 |
| 454 | Ablim2    | -1.38 |
| 455 | Cdk5r2    | -1.39 |
| 456 | Zcchc12   | -1.39 |
| 457 | Arhgap26  | -1.39 |
| 458 | Mapk11    | -1.4  |
| 459 | Kiaa0895l | -1.4  |
| 460 | Capn5     | -1.41 |
| 461 | Dhcr7     | -1.41 |
| 462 | Tnfsf10   | -1.41 |
| 463 | Adrbk2    | -1.41 |
| 464 | Mx1       | -1.42 |

|     |           |       |
|-----|-----------|-------|
| 465 | Mx1       | -1.42 |
| 466 | Mx1       | -1.42 |
| 467 | Mx1       | -1.42 |
| 468 | Mx1       | -1.42 |
| 469 | Mx1       | -1.43 |
| 470 | Jakmip1   | -1.43 |
| 471 | Scg5      | -1.44 |
| 472 | Atp1a1    | -1.44 |
| 473 | Epha5     | -1.44 |
| 474 | Nap1l5    | -1.45 |
| 475 | Serpina12 | -1.45 |
| 476 | Aldoc     | -1.45 |
| 477 | Ret       | -1.46 |
| 478 | Ehd3      | -1.46 |
| 479 | Slc25a1   | -1.46 |
| 480 | Dpysl3    | -1.46 |
| 481 | Mir3577   | -1.47 |
| 482 | Bcat1     | -1.48 |
| 483 | Dpp6      | -1.48 |
| 484 | Cish      | -1.48 |
| 485 | Kif2c     | -1.5  |
| 486 | Pfcp      | -1.5  |
| 487 | Gdap1l1   | -1.51 |
| 488 | Acot7     | -1.51 |
| 489 | Zwint     | -1.52 |
| 490 | Acat2     | -1.52 |
| 491 | Faim2     | -1.52 |
| 492 | Eef1a2    | -1.54 |
| 493 | Kif2c     | -1.54 |
| 494 | Acot7     | -1.54 |
| 495 | Adcyap1r1 | -1.55 |
| 496 | Adcyap1r1 | -1.55 |
| 497 | Tll1      | -1.55 |
| 498 | Scn3b     | -1.55 |
| 499 | Alcam     | -1.55 |
| 500 | Epdr1     | -1.55 |
| 501 | Ret       | -1.56 |
| 502 | Adcyap1r1 | -1.56 |
| 503 | Adcyap1r1 | -1.56 |

|     |           |       |
|-----|-----------|-------|
| 504 | Adcyap1r1 | -1.56 |
| 505 | Adcyap1r1 | -1.56 |
| 506 | Apc2      | -1.56 |
| 507 | Rab15     | -1.56 |
| 508 | Maoa      | -1.56 |
| 509 | Nacad     | -1.56 |
| 510 | Stx1a     | -1.57 |
| 511 | Elavl2    | -1.58 |
| 512 | Rundc3a   | -1.58 |
| 513 | Rgs7      | -1.58 |
| 514 | Hmx1      | -1.58 |
| 515 | Olfm2     | -1.59 |
| 516 | Tram111   | -1.6  |
| 517 | Arhgdig   | -1.6  |
| 518 | Layn      | -1.61 |
| 519 | Fdft1     | -1.61 |
| 520 | Elovl4    | -1.62 |
| 521 | Oxtr      | -1.63 |
| 522 | Tspan8    | -1.63 |
| 523 | Syt2      | -1.63 |
| 524 | Mmp15     | -1.63 |
| 525 | Mapt      | -1.64 |
| 526 | Scn9a     | -1.65 |
| 527 | Coro2a    | -1.65 |
| 528 | Nefh      | -1.65 |
| 529 | Syt11     | -1.67 |
| 530 | Atp7a     | -1.67 |
| 531 | Cplx2     | -1.67 |
| 532 | Elovl6    | -1.68 |
| 533 | Lynx1     | -1.68 |
| 534 | Gng3      | -1.69 |
| 535 | Disp2     | -1.69 |
| 536 | Kcnmb4    | -1.69 |
| 537 | Ldlr      | -1.69 |
| 538 | Elovl6    | -1.7  |
| 539 | Cyp51     | -1.7  |
| 540 | Syn1      | -1.7  |
| 541 | Spock1    | -1.7  |
| 542 | Apba1     | -1.71 |

|     |            |       |
|-----|------------|-------|
| 543 | Slc31a1    | -1.71 |
| 544 | Atcay      | -1.71 |
| 545 | Ptpn       | -1.71 |
| 546 | Fxyd6      | -1.71 |
| 547 | Pcp4       | -1.72 |
| 548 | Nsg1       | -1.72 |
| 549 | Tppp3      | -1.72 |
| 550 | Cadm1      | -1.73 |
| 551 | Syn1       | -1.73 |
| 552 | Syt17      | -1.74 |
| 553 | Nxph4      | -1.74 |
| 554 | Napb       | -1.75 |
| 555 | Tm4sf4     | -1.75 |
| 556 | Pcp4       | -1.75 |
| 557 | Acly       | -1.75 |
| 558 | Ina        | -1.76 |
| 559 | Kcnc4      | -1.76 |
| 560 | Sv2c       | -1.76 |
| 561 | Atl1       | -1.76 |
| 562 | Tubb4a     | -1.76 |
| 563 | Acly       | -1.76 |
| 564 | RGD1305733 | -1.76 |
| 565 | Me1        | -1.77 |
| 566 | Kif5a      | -1.78 |
| 567 | Ngb        | -1.79 |
| 568 | Rtn1       | -1.79 |
| 569 | Fam163a    | -1.79 |
| 570 | Crmp1      | -1.79 |
| 571 | Tubb2a     | -1.79 |
| 572 | Dync1i1    | -1.81 |
| 573 | Sostdc1    | -1.82 |
| 574 | Resp18     | -1.83 |
| 575 | Fgf1       | -1.83 |
| 576 | Nmnat2     | -1.84 |
| 577 | Rab3c      | -1.85 |
| 578 | Rufy3      | -1.85 |
| 579 | Chga       | -1.86 |
| 580 | Brinp2     | -1.86 |
| 581 | Dusp26     | -1.86 |

|     |         |       |
|-----|---------|-------|
| 582 | Phox2a  | -1.87 |
| 583 | Ckmt1b  | -1.87 |
| 584 | Scube1  | -1.87 |
| 585 | Celf3   | -1.88 |
| 586 | Mx2     | -1.88 |
| 587 | Ncald   | -1.89 |
| 588 | Ptpn2   | -1.89 |
| 589 | Arvcf   | -1.89 |
| 590 | Snca    | -1.9  |
| 591 | Rgs4    | -1.91 |
| 592 | Hand2   | -1.91 |
| 593 | Gng2    | -1.92 |
| 594 | Chrm2   | -1.93 |
| 595 | Gng2    | -1.93 |
| 596 | Rab6b   | -1.94 |
| 597 | Slc29a4 | -1.94 |
| 598 | Prkar1b | -1.94 |
| 599 | Lhfp15  | -1.95 |
| 600 | Pcbp3   | -1.96 |
| 601 | Sult4a1 | -1.96 |
| 602 | Mllt11  | -1.97 |
| 603 | Scn7a   | -1.98 |
| 604 | Nsg2    | -1.98 |
| 605 | Tmem130 | -1.98 |
| 606 | Mvd     | -1.98 |
| 607 | Ppp2r2b | -2.01 |
| 608 | Vamp1   | -2.02 |
| 609 | Lxn     | -2.03 |
| 610 | Bex2    | -2.03 |
| 611 | Hand1   | -2.04 |
| 612 | Bex1    | -2.05 |
| 613 | Ddah1   | -2.05 |
| 614 | Dpysl5  | -2.05 |
| 615 | Epb41l3 | -2.05 |
| 616 | Thy1    | -2.05 |
| 617 | Tubb2b  | -2.07 |
| 618 | Ndr4    | -2.07 |
| 619 | Ndr4    | -2.07 |
| 620 | Ndr4    | -2.07 |



|     |          |       |
|-----|----------|-------|
| 621 | Ndr4     | -2.07 |
| 622 | Mir770   | -2.08 |
| 623 | Scg2     | -2.08 |
| 624 | Prkg2    | -2.08 |
| 625 | Gap43    | -2.09 |
| 626 | Ndr4     | -2.09 |
| 627 | Tagln3   | -2.1  |
| 628 | Ndr4     | -2.1  |
| 629 | Tub      | -2.11 |
| 630 | Tagln3   | -2.11 |
| 631 | Sqle     | -2.12 |
| 632 | Celf6    | -2.12 |
| 633 | Cend1    | -2.13 |
| 634 | Cend1    | -2.13 |
| 635 | Ppp2r2b  | -2.13 |
| 636 | Rit2     | -2.13 |
| 637 | Tlx2     | -2.14 |
| 638 | Dhcr24   | -2.15 |
| 639 | Reep1    | -2.15 |
| 640 | Cadps    | -2.16 |
| 641 | Syp      | -2.18 |
| 642 | Uchl1    | -2.19 |
| 643 | Syt9     | -2.2  |
| 644 | Edn3     | -2.24 |
| 645 | Fasn     | -2.25 |
| 646 | Cyb561   | -2.25 |
| 647 | Scd1     | -2.26 |
| 648 | L1cam    | -2.26 |
| 649 | Isl1     | -2.27 |
| 650 | Tmem255a | -2.3  |
| 651 | Scgn     | -2.3  |
| 652 | Tmem35   | -2.32 |
| 653 | Th       | -2.35 |
| 654 | Chrb4    | -2.4  |
| 655 | Syt4     | -2.4  |
| 656 | Stmn3    | -2.42 |
| 657 | Syng3    | -2.44 |
| 658 | Syn2     | -2.51 |
| 659 | Cd24     | -2.53 |

|     |         |       |
|-----|---------|-------|
| 660 | Syn2    | -2.53 |
| 661 | Syt1    | -2.53 |
| 662 | Htr3b   | -2.54 |
| 663 | Drd2    | -2.55 |
| 664 | Ache    | -2.55 |
| 665 | Ddc     | -2.61 |
| 666 | Ddc     | -2.61 |
| 667 | Slc18a2 | -2.62 |
| 668 | Chrna7  | -2.63 |
| 669 | Ddc     | -2.64 |
| 670 | Fkbp1b  | -2.67 |
| 671 | Rab3b   | -2.68 |
| 672 | Tubb3   | -2.8  |
| 673 | Slc10a4 | -2.81 |
| 674 | Ngfr    | -2.82 |
| 675 | Vip     | -2.88 |
| 676 | Pirt    | -2.93 |
| 677 | Htr3a   | -2.94 |
| 678 | Nefm    | -2.94 |
| 679 | Stk32a  | -2.94 |
| 680 | Stmn2   | -2.95 |
| 681 | Prph    | -2.97 |
| 682 | Ntrk1   | -2.99 |
| 683 | Nefl    | -3.03 |
| 684 | Chrna3  | -3.08 |
| 685 | Dbh     | -3.16 |
| 686 | Avil    | -3.27 |
| 687 | Pnpla3  | -3.43 |
| 688 | Slc6a2  | -3.43 |
| 689 | Fabp9   | -3.49 |

**SUPPLEMENTAL TABLE- 2: NORMOXIA THROMBOTIC**

| <b>S.No.</b> | <b>Gene Symbol</b> | <b>Log Fold Change</b> |
|--------------|--------------------|------------------------|
| 1            | Nos2               | 6.81                   |
| 2            | Il1r2              | 6.63                   |
| 3            | Cxcl1              | 6.59                   |
| 4            | S100a8             | 6.5                    |
| 5            | S100a9             | 6.49                   |
| 6            | Ptx3               | 6.13                   |
| 7            | Mmp8               | 6.12                   |
| 8            | Prok2              | 6.05                   |
| 9            | Pglyrp1            | 6.04                   |
| 10           | Ccl2               | 6.01                   |
| 11           | Trem1              | 5.96                   |
| 12           | Il6                | 5.9                    |
| 13           | Prok2              | 5.84                   |
| 14           | Cxcl2              | 5.77                   |
| 15           | Csf3               | 5.64                   |
| 16           | Lilrb4             | 5.62                   |
| 17           | Hp                 | 5.61                   |
| 18           | RGD1565374         | 5.56                   |
| 19           | Osm                | 5.52                   |
| 20           | Cxcl5              | 5.28                   |
| 21           | Clec4d             | 5.27                   |
| 22           | Mt1a               | 5.22                   |
| 23           | Mt2A               | 5.12                   |
| 24           | Slpi               | 5.02                   |
| 25           | Clec4e             | 5.01                   |
| 26           | Ccl7               | 4.92                   |
| 27           | Spil2              | 4.9                    |
| 28           | Il1b               | 4.89                   |
| 29           | Slc16a3            | 4.89                   |
| 30           | Socs3              | 4.83                   |
| 31           | Csf3r              | 4.8                    |
| 32           | Mir147             | 4.78                   |
| 33           | Cxcl3              | 4.68                   |
| 34           | Sell               | 4.66                   |
| 35           | Mmp9               | 4.65                   |
| 36           | Tlr2               | 4.64                   |
| 37           | Rnd1               | 4.55                   |

|    |           |      |
|----|-----------|------|
| 38 | Cxcr2     | 4.54 |
| 39 | Camp      | 4.46 |
| 40 | Clec7a    | 4.45 |
| 41 | Mir223    | 4.37 |
| 42 | Fcnb      | 4.31 |
| 43 | Trem11    | 4.31 |
| 44 | Samsn1    | 4.31 |
| 45 | MGC105649 | 4.29 |
| 46 | Nfe2      | 4.24 |
| 47 | F2rl2     | 4.21 |
| 48 | Napsa     | 4.17 |
| 49 | Serpinb1a | 4.15 |
| 50 | Serpine1  | 4.1  |
| 51 | Thbs1     | 4.06 |
| 52 | Ceacam10  | 4.01 |
| 53 | Ceacam10  | 4.01 |
| 54 | Tnfaip6   | 3.97 |
| 55 | Mxd1      | 3.94 |
| 56 | Olfm4     | 3.94 |
| 57 | Gp1bb     | 3.93 |
| 58 | Hmox1     | 3.89 |
| 59 | Ccr7      | 3.88 |
| 60 | Themis2   | 3.82 |
| 61 | Has1      | 3.79 |
| 62 | Tgm1      | 3.79 |
| 63 | Fcar      | 3.78 |
| 64 | Sphk1     | 3.77 |
| 65 | Plaur     | 3.74 |
| 66 | Plaur     | 3.74 |
| 67 | Csf2rb    | 3.74 |
| 68 | Sphk1     | 3.72 |
| 69 | Sphk1     | 3.71 |
| 70 | Alox5ap   | 3.69 |
| 71 | Sphk1     | 3.66 |
| 72 | Nlrp12    | 3.64 |
| 73 | Nrgn      | 3.64 |
| 74 | Alox12    | 3.63 |
| 75 | Pla2g7    | 3.61 |
| 76 | LOC498276 | 3.61 |
| 77 | Tnnc1     | 3.61 |
| 78 | Sbno2     | 3.59 |

|     |           |      |
|-----|-----------|------|
| 79  | Sphk1     | 3.59 |
| 80  | Sphk1     | 3.58 |
| 81  | Tmem154   | 3.56 |
| 82  | Rgs1      | 3.56 |
| 83  | Gzmk      | 3.55 |
| 84  | LOC498276 | 3.55 |
| 85  | Tfpi2     | 3.53 |
| 86  | Adamts4   | 3.53 |
| 87  | Lilrb3    | 3.52 |
| 88  | Chi3l1    | 3.52 |
| 89  | Phlda1    | 3.5  |
| 90  | Fcgr2a    | 3.5  |
| 91  | Nfkbiz    | 3.47 |
| 92  | Gadd45a   | 3.45 |
| 93  | Tnfrsf14  | 3.4  |
| 94  | C5ar1     | 3.37 |
| 95  | Gp9       | 3.35 |
| 96  | Dusp2     | 3.33 |
| 97  | Oas1k     | 3.33 |
| 98  | Lst1      | 3.31 |
| 99  | Fetub     | 3.31 |
| 100 | Ifit3     | 3.3  |
| 101 | Plek      | 3.26 |
| 102 | Slpil3    | 3.25 |
| 103 | Zc3h12a   | 3.23 |
| 104 | Arid5a    | 3.23 |
| 105 | Fosl1     | 3.22 |
| 106 | Ccl4      | 3.22 |
| 107 | Ppbp      | 3.21 |
| 108 | Bcl3      | 3.2  |
| 109 | Tyrobp    | 3.19 |
| 110 | Cd69      | 3.19 |
| 111 | Acap1     | 3.18 |
| 112 | Il1rn     | 3.17 |
| 113 | Fgr       | 3.14 |
| 114 | Pstpip1   | 3.13 |
| 115 | Ly6g6f    | 3.09 |
| 116 | Clec5a    | 3.07 |
| 117 | Serpib10  | 3.07 |
| 118 | Cebpb     | 3.06 |
| 119 | LOC691141 | 3.06 |

|     |           |      |
|-----|-----------|------|
| 120 | Dusp5     | 3.04 |
| 121 | Clec1b    | 3.04 |
| 122 | S1pr4     | 3.04 |
| 123 | Selplg    | 3.04 |
| 124 | Olr1      | 3.01 |
| 125 | Ptprc     | 3.01 |
| 126 | Ptprc     | 3.01 |
| 127 | Ptprc     | 3.01 |
| 128 | Selp      | 3.01 |
| 129 | Ptprc     | 3    |
| 130 | Apold1    | 2.99 |
| 131 | Ptprc     | 2.99 |
| 132 | Gna15     | 2.98 |
| 133 | Ncf4      | 2.97 |
| 134 | Birc3     | 2.95 |
| 135 | Fgl2      | 2.92 |
| 136 | Gp5       | 2.91 |
| 137 | Arhgap25  | 2.9  |
| 138 | Ccr1      | 2.9  |
| 139 | Csrnp1    | 2.89 |
| 140 | Pim1      | 2.87 |
| 141 | Tbc1d10c  | 2.87 |
| 142 | Cd177     | 2.87 |
| 143 | Clec4b2   | 2.87 |
| 144 | Stx11     | 2.86 |
| 145 | Mov10     | 2.86 |
| 146 | Runx3     | 2.86 |
| 147 | Padi4     | 2.85 |
| 148 | Ccl5      | 2.85 |
| 149 | Degs2     | 2.84 |
| 150 | Cd300a    | 2.84 |
| 151 | Ngp       | 2.83 |
| 152 | Junb      | 2.83 |
| 153 | Ltb       | 2.81 |
| 154 | Lilrb3l   | 2.81 |
| 155 | Tnfrsf12a | 2.8  |
| 156 | Gzma      | 2.79 |
| 157 | Tnfrsf18  | 2.79 |
| 158 | Fosl2     | 2.79 |
| 159 | Hba1      | 2.78 |
| 160 | Ncf2      | 2.78 |

|     |              |      |
|-----|--------------|------|
| 161 | Cd27         | 2.77 |
| 162 | Nuak2        | 2.77 |
| 163 | Hspa1a       | 2.76 |
| 164 | Oscar        | 2.76 |
| 165 | Gp1ba        | 2.76 |
| 166 | Ltb4r        | 2.76 |
| 167 | Spp1         | 2.76 |
| 168 | Dok3         | 2.76 |
| 169 | Cyp4f18      | 2.76 |
| 170 | Fgd3         | 2.75 |
| 171 | Susd3        | 2.75 |
| 172 | Coro1a       | 2.74 |
| 173 | Hbb          | 2.74 |
| 174 | Itk          | 2.74 |
| 175 | Fmn1         | 2.74 |
| 176 | Rn5-8s       | 2.73 |
| 177 | Rn5-8s       | 2.73 |
| 178 | Rn5-8s       | 2.73 |
| 179 | Rn5-8s       | 2.73 |
| 180 | Rn5-8s       | 2.73 |
| 181 | Cd3d         | 2.73 |
| 182 | Adamts1      | 2.73 |
| 183 | Tacc3        | 2.73 |
| 184 | Rn5-8s       | 2.73 |
| 185 | Sema4a       | 2.72 |
| 186 | Il17ra       | 2.72 |
| 187 | Lyz2         | 2.72 |
| 188 | Sat1         | 2.72 |
| 189 | Rn5-8s       | 2.72 |
| 190 | Ccl17        | 2.72 |
| 191 | Hbg1         | 2.71 |
| 192 | LOC100134871 | 2.71 |
| 193 | Lif          | 2.71 |
| 194 | Hbb-b1       | 2.7  |
| 195 | Slc11a1      | 2.7  |
| 196 | Lyc2         | 2.69 |
| 197 | Clec4f       | 2.68 |
| 198 | Arhgap9      | 2.68 |
| 199 | Hspa1l       | 2.67 |
| 200 | Glrx         | 2.67 |

|     |           |      |
|-----|-----------|------|
| 201 | Klrb1b    | 2.66 |
| 202 | Fosl2     | 2.66 |
| 203 | Ccl3      | 2.66 |
| 204 | Lcp1      | 2.66 |
| 205 | Tlr1      | 2.66 |
| 206 | Spi1      | 2.65 |
| 207 | Cd53      | 2.65 |
| 208 | Ptafr     | 2.65 |
| 209 | Alas2     | 2.65 |
| 210 | Hba2      | 2.65 |
| 211 | LOC287167 | 2.65 |
| 212 | Ptpn18    | 2.64 |
| 213 | Litaf     | 2.64 |
| 214 | Hmha1     | 2.63 |
| 215 | LOC685157 | 2.63 |
| 216 | Timp1     | 2.62 |
| 217 | Sema4d    | 2.62 |
| 218 | Snx20     | 2.62 |
| 219 | LOC689064 | 2.61 |
| 220 | Slc2a1    | 2.59 |
| 221 | Rhov      | 2.58 |
| 222 | Elane     | 2.58 |
| 223 | Sod2      | 2.57 |
| 224 | Pf4       | 2.57 |
| 225 | Socs1     | 2.56 |
| 226 | Nfil3     | 2.56 |
| 227 | G6b       | 2.55 |
| 228 | Rbm38     | 2.55 |
| 229 | P2ry13    | 2.55 |
| 230 | Nkr-p1c   | 2.55 |
| 231 | Cd8a      | 2.55 |
| 232 | Cd3e      | 2.55 |
| 233 | Upp1      | 2.53 |
| 234 | Cd97      | 2.53 |
| 235 | Hspa1b    | 2.5  |
| 236 | Lax1      | 2.5  |
| 237 | Hk3       | 2.5  |
| 238 | Mir295-2  | 2.49 |
| 239 | Mir295-1  | 2.49 |
| 240 | Mir295-2  | 2.49 |
| 241 | Mir295-1  | 2.49 |



|     |            |      |
|-----|------------|------|
| 242 | Arhgap9    | 2.49 |
| 243 | Slfn3      | 2.49 |
| 244 | Lilrc2     | 2.48 |
| 245 | Cd52       | 2.48 |
| 246 | Il4r       | 2.47 |
| 247 | Ets2       | 2.46 |
| 248 | Smox       | 2.45 |
| 249 | Rab20      | 2.45 |
| 250 | Gadd45b    | 2.44 |
| 251 | Atf3       | 2.44 |
| 252 | Sh2d2a     | 2.43 |
| 253 | Oasl       | 2.43 |
| 254 | RGD1564664 | 2.42 |
| 255 | Ugdh       | 2.42 |
| 256 | Pacrg      | 2.41 |
| 257 | Ctrb1      | 2.41 |
| 258 | Cdkn1a     | 2.4  |
| 259 | Ch25h      | 2.4  |
| 260 | Stk17b     | 2.4  |
| 261 | Dennd1c    | 2.4  |
| 262 | Nlrp3      | 2.4  |
| 263 | Rhoh       | 2.39 |
| 264 | Rrad       | 2.38 |
| 265 | Sdc4       | 2.35 |
| 266 | Cytip      | 2.35 |
| 267 | Plin2      | 2.35 |
| 268 | Slc2a3     | 2.35 |
| 269 | Slc2a3     | 2.35 |
| 270 | Glpr1      | 2.34 |
| 271 | LOC305806  | 2.34 |
| 272 | Wfdc15b    | 2.33 |
| 273 | Laptm5     | 2.33 |
| 274 | Mir142     | 2.33 |
| 275 | Oas1d      | 2.33 |
| 276 | Oas1d      | 2.33 |
| 277 | Cebpd      | 2.32 |
| 278 | Ier2       | 2.32 |
| 279 | Il21r      | 2.31 |
| 280 | Ogfrl1     | 2.31 |
| 281 | Retnlg     | 2.31 |
| 282 | Emb        | 2.3  |

|     |           |      |
|-----|-----------|------|
| 283 | Itgb2     | 2.29 |
| 284 | Itpkc     | 2.29 |
| 285 | Zfp36     | 2.29 |
| 286 | Satb1     | 2.29 |
| 287 | Hcls1     | 2.29 |
| 288 | Kdm6b     | 2.29 |
| 289 | Rac2      | 2.26 |
| 290 | Lrg1      | 2.26 |
| 291 | Crem      | 2.26 |
| 292 | Gmfg      | 2.25 |
| 293 | Aqp9      | 2.25 |
| 294 | Crem      | 2.25 |
| 295 | Fermt3    | 2.24 |
| 296 | Adm       | 2.24 |
| 297 | Cd3g      | 2.24 |
| 298 | Tmc8      | 2.24 |
| 299 | Ptpn22    | 2.23 |
| 300 | Fcgr2b    | 2.23 |
| 301 | Hspb1     | 2.22 |
| 302 | Egr1      | 2.21 |
| 303 | Btg2      | 2.2  |
| 304 | Cxcl10    | 2.2  |
| 305 | Crem      | 2.2  |
| 306 | Itgam     | 2.19 |
| 307 | Fpr1      | 2.18 |
| 308 | Trib1     | 2.18 |
| 309 | Cxcr4     | 2.17 |
| 310 | Fcgr1a    | 2.16 |
| 311 | Gpr132    | 2.16 |
| 312 | Ebi3      | 2.16 |
| 313 | Rassf5    | 2.16 |
| 314 | Mir3561   | 2.15 |
| 315 | Crem      | 2.15 |
| 316 | Unc13d    | 2.14 |
| 317 | LOC652956 | 2.13 |
| 318 | Ccn1      | 2.13 |
| 319 | Rnf19b    | 2.13 |
| 320 | Crem      | 2.13 |
| 321 | Ccl6      | 2.12 |
| 322 | Crem      | 2.12 |
| 323 | Ptges     | 2.11 |

|     |            |      |
|-----|------------|------|
| 324 | Sgms2      | 2.11 |
| 325 | Alox15     | 2.11 |
| 326 | Hck        | 2.1  |
| 327 | Cd101      | 2.1  |
| 328 | Tnc        | 2.1  |
| 329 | Ly6g6c     | 2.09 |
| 330 | Ampd3      | 2.09 |
| 331 | Mkrn1      | 2.09 |
| 332 | LOC24906   | 2.09 |
| 333 | Trim72     | 2.08 |
| 334 | Nr4a1      | 2.08 |
| 335 | Dck        | 2.08 |
| 336 | Cd247      | 2.07 |
| 337 | Ramp3      | 2.07 |
| 338 | Sep-01     | 2.06 |
| 339 | Serinc2    | 2.06 |
| 340 | Gk         | 2.06 |
| 341 | Gmpr       | 2.06 |
| 342 | Slc7a5     | 2.06 |
| 343 | Hbegf      | 2.06 |
| 344 | Ier3       | 2.05 |
| 345 | Nkg7       | 2.05 |
| 346 | Sdcbp2     | 2.05 |
| 347 | P2ry10     | 2.05 |
| 348 | F5         | 2.05 |
| 349 | Syk        | 2.05 |
| 350 | Pik3r5     | 2.04 |
| 351 | Cd247      | 2.04 |
| 352 | Rab24      | 2.04 |
| 353 | Bin2       | 2.03 |
| 354 | Hbz        | 2.02 |
| 355 | Stxbp2     | 2.02 |
| 356 | Slamf6     | 2.01 |
| 357 | RGD2301395 | 2    |
| 358 | Ier5       | 2    |
| 359 | Lmnb1      | 2    |
| 360 | Cdc25b     | 1.99 |
| 361 | Ngf        | 1.99 |
| 362 | Myo1f      | 1.99 |
| 363 | Crem       | 1.99 |
| 364 | PVR        | 1.98 |

|     |          |      |
|-----|----------|------|
| 365 | Ifitm1   | 1.98 |
| 366 | Exo5     | 1.98 |
| 367 | Retnlb   | 1.98 |
| 368 | Arhgap30 | 1.98 |
| 369 | Txk      | 1.98 |
| 370 | Lck      | 1.97 |
| 371 | Itgb7    | 1.97 |
| 372 | Mefv     | 1.97 |
| 373 | Bst1     | 1.97 |
| 374 | Tlr6     | 1.97 |
| 375 | Fosb     | 1.96 |
| 376 | Parvg    | 1.96 |
| 377 | Crem     | 1.96 |
| 378 | Cd19     | 1.95 |
| 379 | Igsf6    | 1.95 |
| 380 | Def6     | 1.94 |
| 381 | Hbe1     | 1.94 |
| 382 | Cd2      | 1.94 |
| 383 | Gch1     | 1.94 |
| 384 | Csf2ra   | 1.94 |
| 385 | Fes      | 1.93 |
| 386 | Ncr3     | 1.92 |
| 387 | Ctsw     | 1.92 |
| 388 | Lat      | 1.92 |
| 389 | Tmem71   | 1.92 |
| 390 | Pik3cd   | 1.9  |
| 391 | Clec4a2  | 1.9  |
| 392 | Bpgm     | 1.9  |
| 393 | R3hdm4   | 1.9  |
| 394 | Serpib11 | 1.9  |
| 395 | Il10     | 1.9  |
| 396 | Srgn     | 1.89 |
| 397 | Gpr4     | 1.89 |
| 398 | Klr1a    | 1.89 |
| 399 | Grap2    | 1.89 |
| 400 | Car4     | 1.89 |
| 401 | Rara     | 1.89 |
| 402 | Fcer1g   | 1.89 |
| 403 | Cd226    | 1.89 |
| 404 | Gpsm3    | 1.88 |
| 405 | Rrm2     | 1.88 |

|     |          |      |
|-----|----------|------|
| 406 | Zap70    | 1.88 |
| 407 | Cryab    | 1.88 |
| 408 | Art2b    | 1.86 |
| 409 | Ptger2   | 1.86 |
| 410 | Lsp1     | 1.85 |
| 411 | Epb42    | 1.85 |
| 412 | Stfa3    | 1.85 |
| 413 | Oas1h    | 1.85 |
| 414 | Ncf1     | 1.85 |
| 415 | Cd44     | 1.84 |
| 416 | Txnrd1   | 1.84 |
| 417 | Zdhhc18  | 1.83 |
| 418 | Plk3     | 1.83 |
| 419 | Ptpn6    | 1.83 |
| 420 | Il10ra   | 1.83 |
| 421 | Patz1    | 1.83 |
| 422 | Rasgrp4  | 1.82 |
| 423 | C1rl     | 1.82 |
| 424 | Apobr    | 1.81 |
| 425 | Arhgap15 | 1.81 |
| 426 | Ripk3    | 1.81 |
| 427 | Hpse     | 1.81 |
| 428 | Ifit1    | 1.8  |
| 429 | Ccrn4l   | 1.8  |
| 430 | Sstr3    | 1.8  |
| 431 | Skap1    | 1.8  |
| 432 | Slc39a14 | 1.8  |
| 433 | Prf1     | 1.79 |
| 434 | Ucp2     | 1.79 |
| 435 | Akna     | 1.79 |
| 436 | Gimap7   | 1.79 |
| 437 | Il2rb    | 1.79 |
| 438 | Tmem156  | 1.79 |
| 439 | Ptpn1    | 1.78 |
| 440 | Vav1     | 1.78 |
| 441 | Gata1    | 1.78 |
| 442 | Gata1    | 1.78 |
| 443 | Gfap     | 1.78 |
| 444 | Spry1    | 1.77 |
| 445 | Coq10b   | 1.77 |
| 446 | Il7r     | 1.77 |

|     |            |      |
|-----|------------|------|
| 447 | Phospho1   | 1.77 |
| 448 | Myo1g      | 1.77 |
| 449 | Map3k8     | 1.77 |
| 450 | Pdk3       | 1.76 |
| 451 | Runx1      | 1.76 |
| 452 | Chrne      | 1.76 |
| 453 | Lgals5     | 1.76 |
| 454 | Itgb3      | 1.76 |
| 455 | Hopx       | 1.76 |
| 456 | RGD1306058 | 1.76 |
| 457 | Itgal      | 1.75 |
| 458 | Was        | 1.75 |
| 459 | Cd83       | 1.75 |
| 460 | Lcn2       | 1.74 |
| 461 | Car2       | 1.74 |
| 462 | Pla1a      | 1.74 |
| 463 | Klrd1      | 1.73 |
| 464 | Prg4       | 1.73 |
| 465 | Bcar1      | 1.73 |
| 466 | Cd6        | 1.72 |
| 467 | Midn       | 1.72 |
| 468 | Hist1h2ail | 1.72 |
| 469 | Muc20      | 1.71 |
| 470 | Rgs18      | 1.71 |
| 471 | Gzmb       | 1.71 |
| 472 | Gdf15      | 1.71 |
| 473 | Egr2       | 1.7  |
| 474 | Dapp1      | 1.7  |
| 475 | Slc4a1     | 1.7  |
| 476 | Lcp2       | 1.7  |
| 477 | Klf1       | 1.7  |
| 478 | Ahsp       | 1.69 |
| 479 | Bcl2l11    | 1.69 |
| 480 | Bcl2l11    | 1.69 |
| 481 | Fyb        | 1.69 |
| 482 | Cnr2       | 1.69 |
| 483 | Rab11fip1  | 1.69 |
| 484 | Gca        | 1.68 |
| 485 | Myc        | 1.68 |
| 486 | Tmem86b    | 1.66 |
| 487 | Clcf1      | 1.66 |

|     |            |      |
|-----|------------|------|
| 488 | Tnfrsf1b   | 1.66 |
| 489 | RGD1304595 | 1.66 |
| 490 | Btg1       | 1.66 |
| 491 | Ybx3       | 1.65 |
| 492 | Abtb1      | 1.65 |
| 493 | Myd88      | 1.65 |
| 494 | H3f3b      | 1.65 |
| 495 | Orai1      | 1.65 |
| 496 | Arhgap8    | 1.64 |
| 497 | Icam1      | 1.64 |
| 498 | Prkcq      | 1.64 |
| 499 | Gadd45g    | 1.64 |
| 500 | Fjx1       | 1.63 |
| 501 | Mir126     | 1.63 |
| 502 | Lgals2     | 1.63 |
| 503 | Mpeg1      | 1.62 |
| 504 | Trat1      | 1.62 |
| 505 | Cd300lf    | 1.62 |
| 506 | Trib3      | 1.61 |
| 507 | Rhbdf2     | 1.61 |
| 508 | Vps37b     | 1.61 |
| 509 | Id1        | 1.6  |
| 510 | Il1rap     | 1.6  |
| 511 | Rhbdf2     | 1.6  |
| 512 | Hist1h2ba  | 1.6  |
| 513 | Fbxo27     | 1.59 |
| 514 | Plcb2      | 1.59 |
| 515 | Vcan       | 1.59 |
| 516 | Hk2        | 1.59 |
| 517 | Tgif1      | 1.58 |
| 518 | Prdx5      | 1.57 |
| 519 | Chst11     | 1.57 |
| 520 | Rasal3     | 1.57 |
| 521 | Pfkfb4     | 1.57 |
| 522 | Cd14       | 1.57 |
| 523 | LOC308990  | 1.56 |
| 524 | Slc15a3    | 1.56 |
| 525 | Sla        | 1.56 |
| 526 | Ptgs2      | 1.56 |
| 527 | Jak3       | 1.56 |
| 528 | Ass1       | 1.55 |

|     |            |      |
|-----|------------|------|
| 529 | LOC367975  | 1.55 |
| 530 | Gmip       | 1.55 |
| 531 | Sik1       | 1.54 |
| 532 | Ezr        | 1.54 |
| 533 | Srxn1      | 1.54 |
| 534 | Snx18      | 1.54 |
| 535 | Epha1      | 1.54 |
| 536 | Inpp5d     | 1.54 |
| 537 | Bmx        | 1.54 |
| 538 | Fbxl5      | 1.54 |
| 539 | Rab11fip1  | 1.54 |
| 540 | Slc23a2    | 1.53 |
| 541 | Maff       | 1.53 |
| 542 | Il1rap     | 1.53 |
| 543 | Ctse       | 1.53 |
| 544 | Neurl3     | 1.52 |
| 545 | Arrb2      | 1.52 |
| 546 | Relt       | 1.51 |
| 547 | Map4k1     | 1.51 |
| 548 | Hdc        | 1.51 |
| 549 | Ppp1r3d    | 1.51 |
| 550 | LOC500300  | 1.51 |
| 551 | Dgka       | 1.51 |
| 552 | Cyth4      | 1.51 |
| 553 | Dusp1      | 1.51 |
| 554 | Evi2a      | 1.51 |
| 555 | Ikzf1      | 1.51 |
| 556 | Aoah       | 1.51 |
| 557 | Pik3ap1    | 1.5  |
| 558 | Ceacam1    | 1.5  |
| 559 | Tnfrsf9    | 1.5  |
| 560 | Zyx        | 1.5  |
| 561 | Slc40a1    | 1.5  |
| 562 | RGD1562136 | 1.5  |
| 563 | Psd4       | 1.49 |
| 564 | Smap2      | 1.49 |
| 565 | Hemgn      | 1.49 |
| 566 | Sorl1      | 1.49 |
| 567 | Trpm2      | 1.48 |
| 568 | Pkib       | 1.48 |
| 569 | Pde4b      | 1.48 |



|     |            |      |
|-----|------------|------|
| 570 | Slc38a5    | 1.48 |
| 571 | Plat       | 1.48 |
| 572 | Cd37       | 1.47 |
| 573 | Lbr        | 1.47 |
| 574 | Osgin1     | 1.47 |
| 575 | Tax1bp1    | 1.46 |
| 576 | Batf       | 1.46 |
| 577 | Fcho1      | 1.46 |
| 578 | Riok3      | 1.46 |
| 579 | Pkib       | 1.45 |
| 580 | Pkib       | 1.45 |
| 581 | Ifngr1     | 1.45 |
| 582 | Vcan       | 1.45 |
| 583 | Dio2       | 1.44 |
| 584 | Adam19     | 1.44 |
| 585 | Ptgir      | 1.43 |
| 586 | Dhrs9      | 1.43 |
| 587 | Arid3a     | 1.43 |
| 588 | Ceacam1    | 1.42 |
| 589 | Stom       | 1.42 |
| 590 | Fos        | 1.42 |
| 591 | St8sia4    | 1.42 |
| 592 | Ceacam1    | 1.41 |
| 593 | Klrk1      | 1.41 |
| 594 | Gprc5a     | 1.41 |
| 595 | Rassf1     | 1.41 |
| 596 | Osmr       | 1.4  |
| 597 | Steap4     | 1.4  |
| 598 | Max        | 1.4  |
| 599 | Bcl2a1     | 1.4  |
| 600 | Ppif       | 1.4  |
| 601 | Tmem2      | 1.39 |
| 602 | Baz1a      | 1.39 |
| 603 | Tf         | 1.39 |
| 604 | RGD1563888 | 1.39 |
| 605 | Fam43a     | 1.37 |
| 606 | Tk1        | 1.37 |
| 607 | Pdlim1     | 1.36 |
| 608 | Bcl6       | 1.36 |
| 609 | Cd200r1    | 1.36 |
| 610 | Ppp1r15a   | 1.35 |

|     |           |      |
|-----|-----------|------|
| 611 | Ceacam1   | 1.35 |
| 612 | Ankrd1    | 1.35 |
| 613 | Retnla    | 1.35 |
| 614 | Hist1h2bk | 1.35 |
| 615 | Adck4     | 1.34 |
| 616 | Dot1l     | 1.33 |
| 617 | Bcl2l1    | 1.32 |
| 618 | Il1rl1    | 1.32 |
| 619 | Vcan      | 1.31 |
| 620 | Lef1      | 1.31 |
| 621 | Diaph1    | 1.31 |
| 622 | Mboat7    | 1.3  |
| 623 | Mboat7    | 1.3  |
| 624 | Rhd       | 1.3  |
| 625 | Flnc      | 1.3  |
| 626 | Rabgef1   | 1.3  |
| 627 | Zfand2a   | 1.3  |
| 628 | Ago2      | 1.29 |
| 629 | Nfkbia    | 1.29 |
| 630 | Limd2     | 1.29 |
| 631 | Ptprcap   | 1.28 |
| 632 | Utd1      | 1.28 |
| 633 | Bcl2l1    | 1.28 |
| 634 | Grem1     | 1.28 |
| 635 | Alpl      | 1.28 |
| 636 | Clec12a   | 1.28 |
| 637 | H2afj     | 1.28 |
| 638 | H2afj     | 1.28 |
| 639 | Ifrd1     | 1.28 |
| 640 | Fam107b   | 1.28 |
| 641 | Rassf1    | 1.27 |
| 642 | Phf11     | 1.27 |
| 643 | Rgs19     | 1.26 |
| 644 | Tifa      | 1.26 |
| 645 | Stk10     | 1.26 |
| 646 | Cd84      | 1.26 |
| 647 | Prr7      | 1.26 |
| 648 | Nfkbie    | 1.25 |
| 649 | Trpt1     | 1.24 |
| 650 | Nckap1l   | 1.24 |
| 651 | Evi2b     | 1.24 |

|     |           |      |
|-----|-----------|------|
| 652 | Hist1h2af | 1.24 |
| 653 | P2ry2     | 1.23 |
| 654 | Vcan      | 1.23 |
| 655 | Arrdc3    | 1.23 |
| 656 | Lmbr1l    | 1.23 |
| 657 | Vps54     | 1.23 |
| 658 | Grk6      | 1.23 |
| 659 | Grk6      | 1.23 |
| 660 | Grk6      | 1.23 |
| 661 | Lyn       | 1.22 |
| 662 | Lyn       | 1.22 |
| 663 | Sash3     | 1.22 |
| 664 | Slc25a39  | 1.22 |
| 665 | Eil       | 1.22 |
| 666 | Lpcat2    | 1.22 |
| 667 | Angptl4   | 1.19 |
| 668 | Donson    | 1.19 |
| 669 | Map2k3    | 1.19 |
| 670 | Map2k3    | 1.19 |
| 671 | Spry2     | 1.19 |
| 672 | Iffo1     | 1.18 |
| 673 | Rnf10     | 1.18 |
| 674 | Irak2     | 1.17 |
| 675 | Sptb      | 1.17 |
| 676 | C3        | 1.17 |
| 677 | Il1r1     | 1.17 |
| 678 | Sep-05    | 1.17 |
| 679 | Wsb1      | 1.17 |
| 680 | Cyp2s1    | 1.16 |
| 681 | Soat1     | 1.16 |
| 682 | Arpc1b    | 1.16 |
| 683 | Trpv4     | 1.16 |
| 684 | Pde4d     | 1.15 |
| 685 | Hspb7     | 1.15 |
| 686 | Odc1      | 1.15 |
| 687 | Akap2     | 1.14 |
| 688 | Agap2     | 1.14 |
| 689 | Rrp9      | 1.14 |
| 690 | Rlim      | 1.14 |
| 691 | Rlim      | 1.14 |
| 692 | Grap      | 1.14 |

|     |           |      |
|-----|-----------|------|
| 693 | Il6r      | 1.13 |
| 694 | Gzmm      | 1.13 |
| 695 | Prkab1    | 1.13 |
| 696 | Slc25a37  | 1.13 |
| 697 | Bhlhe40   | 1.12 |
| 698 | Mgrn1     | 1.12 |
| 699 | Hist1h4b  | 1.12 |
| 700 | Pde4d     | 1.11 |
| 701 | Pde4d     | 1.11 |
| 702 | Cpne8     | 1.11 |
| 703 | Tspo      | 1.11 |
| 704 | Nabp1     | 1.11 |
| 705 | Nudt9     | 1.11 |
| 706 | Hist1h2bl | 1.11 |
| 707 | Nipa2     | 1.1  |
| 708 | Samhd1    | 1.1  |
| 709 | Ets1      | 1.1  |
| 710 | Arl5c     | 1.1  |
| 711 | Dnajb1    | 1.1  |
| 712 | Adora2a   | 1.09 |
| 713 | Pde4d     | 1.09 |
| 714 | Mar-03    | 1.09 |
| 715 | Pmaip1    | 1.09 |
| 716 | Rasgrp2   | 1.08 |
| 717 | Rcl1      | 1.08 |
| 718 | Rassf2    | 1.08 |
| 719 | Rbm3      | 1.08 |
| 720 | Tmem252   | 1.07 |
| 721 | Pde4d     | 1.07 |
| 722 | Cxcr5     | 1.07 |
| 723 | Gfpt2     | 1.07 |
| 724 | Uap1      | 1.07 |
| 725 | Sh3bp2    | 1.07 |
| 726 | Tmem173   | 1.07 |
| 727 | Rhog      | 1.06 |
| 728 | Gpr171    | 1.06 |
| 729 | LOC689574 | 1.06 |
| 730 | LOC689574 | 1.06 |
| 731 | Ppan      | 1.06 |
| 732 | Tinf2     | 1.06 |
| 733 | Npy       | 1.05 |

|     |           |      |
|-----|-----------|------|
| 734 | Npy       | 1.05 |
| 735 | Hist1h2bh | 1.05 |
| 736 | Ctu2      | 1.05 |
| 737 | Hps5      | 1.04 |
| 738 | Hamp      | 1.04 |
| 739 | Zc3h12d   | 1.04 |
| 740 | Cd274     | 1.04 |
| 741 | Ankrd33b  | 1.04 |
| 742 | Gem       | 1.04 |
| 743 | St3gal4   | 1.04 |
| 744 | Fth1      | 1.03 |
| 745 | Il2rg     | 1.03 |
| 746 | Sifn2     | 1.03 |
| 747 | Mafk      | 1.03 |
| 748 | Phf11b    | 1.03 |
| 749 | Tnip2     | 1.03 |
| 750 | Jund      | 1.03 |
| 751 | Jund      | 1.03 |
| 752 | Sipa1     | 1.02 |
| 753 | Thbd      | 1.02 |
| 754 | Ifngr2    | 1.02 |
| 755 | Actg1     | 1.02 |
| 756 | Traf7     | 1.02 |
| 757 | LOC257642 | 1.02 |
| 758 | Hist1h2bo | 1.02 |
| 759 | Itga5     | 1.01 |
| 760 | Oas1a     | 1.01 |
| 761 | Edn1      | 1.01 |
| 762 | Hmgb2     | 1.01 |
| 763 | Ptpn2     | 1.01 |
| 764 | Tubb6     | 1.01 |
| 765 | Fgf2      | 1    |
| 766 | Efhd2     | 1    |
| 767 | Hif1a     | 1    |
| 768 | Birc2     | 1    |
| 769 | Niacr1    | 1    |
| 770 | Gpr183    | 1    |
| 771 | Zfp523    | -1   |
| 772 | Tfam      | -1   |
| 773 | Rpp30     | -1   |
| 774 | Ap2a1     | -1   |

|     |              |    |
|-----|--------------|----|
| 775 | LOC100125364 | -1 |
| 776 | Swap70       | -1 |
| 777 | Pstk         | -1 |
| 778 | Cd81         | -1 |
| 779 | Efemp2       | -1 |
| 780 | Jag1         | -1 |
| 781 | Cpxm1        | -1 |
| 782 | Dclk1        | -1 |
| 783 | Ssr2         | -1 |
| 784 | Gdap2        | -1 |
| 785 | Tceanc2      | -1 |
| 786 | Stau2        | -1 |
| 787 | Stau2        | -1 |
| 788 | Slc44a1      | -1 |
| 789 | Isy1         | -1 |
| 790 | Slc25a3      | -1 |
| 791 | Adamtsl5     | -1 |
| 792 | Ptp4a3       | -1 |
| 793 | Gpn1         | -1 |
| 794 | Ppp2r5c      | -1 |
| 795 | Trip12       | -1 |
| 796 | Rbm6         | -1 |
| 797 | Pts          | -1 |
| 798 | Pdcd7        | -1 |
| 799 | Tuba1b       | -1 |
| 800 | Rps4x        | -1 |
| 801 | Zfx          | -1 |
| 802 | Zbtb11       | -1 |
| 803 | Mina         | -1 |
| 804 | LOC304131    | -1 |
| 805 | Wipi1        | -1 |
| 806 | Stub1        | -1 |
| 807 | Hmox2        | -1 |
| 808 | Pdxdc1       | -1 |
| 809 | RGD1310352   | -1 |
| 810 | Hist3h2a     | -1 |
| 811 | RGD1304587   | -1 |
| 812 | Trpv2        | -1 |
| 813 | Ufc1         | -1 |
| 814 | Xpr1         | -1 |

|     |         |       |
|-----|---------|-------|
| 815 | Timm17a | -1    |
| 816 | Acacb   | -1    |
| 817 | Gpn3    | -1    |
| 818 | Anxa3   | -1    |
| 819 | Ppat    | -1    |
| 820 | Cul2    | -1    |
| 821 | Sptlc1  | -1    |
| 822 | Tmco3   | -1    |
| 823 | Erich1  | -1    |
| 824 | Pdp2    | -1    |
| 825 | Ctcf    | -1    |
| 826 | Txn1    | -1    |
| 827 | Ndufa2  | -1    |
| 828 | Impa2   | -1    |
| 829 | Hdac2   | -1.01 |
| 830 | Vps26a  | -1.01 |
| 831 | Ring1   | -1.01 |
| 832 | Cisd1   | -1.01 |
| 833 | Ube2d1  | -1.01 |
| 834 | Mrpl43  | -1.01 |
| 835 | Igf2    | -1.01 |
| 836 | Map3k10 | -1.01 |
| 837 | Cd151   | -1.01 |
| 838 | Cd151   | -1.01 |
| 839 | Mrpl21  | -1.01 |
| 840 | Efemp2  | -1.01 |
| 841 | Vti1a   | -1.01 |
| 842 | Psmb7   | -1.01 |
| 843 | Blvra   | -1.01 |
| 844 | Sclt1   | -1.01 |
| 845 | Vcp     | -1.01 |
| 846 | Scmh1   | -1.01 |
| 847 | Emc1    | -1.01 |
| 848 | Fbxl6   | -1.01 |
| 849 | Them6   | -1.01 |
| 850 | Npc2    | -1.01 |
| 851 | Siva1   | -1.01 |
| 852 | Per2    | -1.01 |
| 853 | Stt3b   | -1.01 |
| 854 | Tbx18   | -1.01 |
| 855 | Ptpn9   | -1.01 |

|     |            |       |
|-----|------------|-------|
| 856 | Wdr48      | -1.01 |
| 857 | Zmym3      | -1.01 |
| 858 | Osbpl11    | -1.01 |
| 859 | Itsn1      | -1.01 |
| 860 | Ogfod3     | -1.01 |
| 861 | Hmox2      | -1.01 |
| 862 | LOC652955  | -1.01 |
| 863 | Asgr2      | -1.01 |
| 864 | Mink1      | -1.01 |
| 865 | Dhrs1      | -1.01 |
| 866 | Cmtm5      | -1.01 |
| 867 | Srp72      | -1.01 |
| 868 | Lrrc8b     | -1.01 |
| 869 | Coq2       | -1.01 |
| 870 | Fbxw17     | -1.01 |
| 871 | Ssr1       | -1.01 |
| 872 | Dkk4       | -1.01 |
| 873 | Cdk10      | -1.01 |
| 874 | Afg3l1     | -1.01 |
| 875 | Afg3l2     | -1.01 |
| 876 | Skiv2l     | -1.02 |
| 877 | Nfkbil1    | -1.02 |
| 878 | Poll       | -1.02 |
| 879 | Dnajc4     | -1.02 |
| 880 | Ndufv1     | -1.02 |
| 881 | Gde1       | -1.02 |
| 882 | Rab6a      | -1.02 |
| 883 | Atg13      | -1.02 |
| 884 | Ehmt1      | -1.02 |
| 885 | Epc2       | -1.02 |
| 886 | RGD1305045 | -1.02 |
| 887 | Serp1      | -1.02 |
| 888 | Mfsd8      | -1.02 |
| 889 | Hps3       | -1.02 |
| 890 | Zbed3      | -1.02 |
| 891 | Vps13d     | -1.02 |
| 892 | Rbbp4      | -1.02 |
| 893 | Cops5      | -1.02 |
| 894 | Ntf3       | -1.02 |
| 895 | Cecr5      | -1.02 |
| 896 | Podxl      | -1.02 |



|     |          |       |
|-----|----------|-------|
| 897 | St3gal5  | -1.02 |
| 898 | Smagp    | -1.02 |
| 899 | Rad21    | -1.02 |
| 900 | Cox6c    | -1.02 |
| 901 | Ndufa12  | -1.02 |
| 902 | Tomm22   | -1.02 |
| 903 | Dnajb9   | -1.02 |
| 904 | Rhoq     | -1.02 |
| 905 | Eif2b4   | -1.02 |
| 906 | Cdc5l    | -1.02 |
| 907 | Gls      | -1.02 |
| 908 | Pafah1b2 | -1.02 |
| 909 | Nlrx1    | -1.02 |
| 910 | Dpy19l1  | -1.02 |
| 911 | Cwc15    | -1.02 |
| 912 | Armcx3   | -1.02 |
| 913 | Tmem41a  | -1.02 |
| 914 | Ube2v2   | -1.02 |
| 915 | Kat7     | -1.02 |
| 916 | Pigw     | -1.02 |
| 917 | Cnot8    | -1.02 |
| 918 | Mrpl12   | -1.02 |
| 919 | Brox     | -1.02 |
| 920 | Ipo9     | -1.02 |
| 921 | Zc3h11a  | -1.02 |
| 922 | Atp5j2   | -1.02 |
| 923 | Tpcn1    | -1.02 |
| 924 | Chd8     | -1.02 |
| 925 | Mrpl1    | -1.02 |
| 926 | Pcgf3    | -1.02 |
| 927 | Psmg4    | -1.02 |
| 928 | Babam1   | -1.02 |
| 929 | Cox4i1   | -1.02 |
| 930 | Hdac3    | -1.02 |
| 931 | Trappc8  | -1.02 |
| 932 | Hk1      | -1.03 |
| 933 | Gnl1     | -1.03 |
| 934 | Nelfe    | -1.03 |
| 935 | Marcksl1 | -1.03 |
| 936 | Exoc3    | -1.03 |
| 937 | Fuz      | -1.03 |

|     |            |       |
|-----|------------|-------|
| 938 | Bub3       | -1.03 |
| 939 | Fbxl15     | -1.03 |
| 940 | Ncoa5      | -1.03 |
| 941 | Tm9sf4     | -1.03 |
| 942 | Rmdn3      | -1.03 |
| 943 | Hipk3      | -1.03 |
| 944 | Rexo4      | -1.03 |
| 945 | Fbxw5      | -1.03 |
| 946 | Scnm1      | -1.03 |
| 947 | Bbs7       | -1.03 |
| 948 | Exosc9     | -1.03 |
| 949 | Ufl1       | -1.03 |
| 950 | Vcpip1     | -1.03 |
| 951 | Tmod1      | -1.03 |
| 952 | Akap9      | -1.03 |
| 953 | Adck2      | -1.03 |
| 954 | Loxl3      | -1.03 |
| 955 | Naga       | -1.03 |
| 956 | Vps28      | -1.03 |
| 957 | Mar-09     | -1.03 |
| 958 | Bsg        | -1.03 |
| 959 | Esyt1      | -1.03 |
| 960 | Slc48a1    | -1.03 |
| 961 | Dcaf5      | -1.03 |
| 962 | Hbp1       | -1.03 |
| 963 | Mpv17l     | -1.03 |
| 964 | Dnpep      | -1.03 |
| 965 | Txnkc9     | -1.03 |
| 966 | Alkbh7     | -1.03 |
| 967 | Sh3bp4     | -1.03 |
| 968 | Hmgn3      | -1.03 |
| 969 | Mpi        | -1.03 |
| 970 | Tuba1a     | -1.03 |
| 971 | RGD1566265 | -1.03 |
| 972 | Usp9x      | -1.03 |
| 973 | Hccs       | -1.03 |
| 974 | Yeats2     | -1.03 |
| 975 | Itsn1      | -1.03 |
| 976 | Cacnb1     | -1.03 |
| 977 | Pitpna     | -1.03 |
| 978 | Mlx        | -1.03 |

|      |            |       |
|------|------------|-------|
| 979  | Mnda       | -1.03 |
| 980  | Setd8      | -1.03 |
| 981  | Slc15a4    | -1.03 |
| 982  | Slc1a4     | -1.03 |
| 983  | Sfrp1      | -1.03 |
| 984  | Tacc1      | -1.03 |
| 985  | Tmed7      | -1.03 |
| 986  | F8         | -1.03 |
| 987  | LOC317165  | -1.03 |
| 988  | LOC294154  | -1.04 |
| 989  | Ppp1r11    | -1.04 |
| 990  | Nelfe      | -1.04 |
| 991  | Prep       | -1.04 |
| 992  | Smc5       | -1.04 |
| 993  | Taz        | -1.04 |
| 994  | Pafah1b3   | -1.04 |
| 995  | Pomt1      | -1.04 |
| 996  | Ctdspl2    | -1.04 |
| 997  | Tp53inp2   | -1.04 |
| 998  | Ahcyl1     | -1.04 |
| 999  | Chtop      | -1.04 |
| 1000 | Pear1      | -1.04 |
| 1001 | Slc1a3     | -1.04 |
| 1002 | Shc1       | -1.04 |
| 1003 | S100a6     | -1.04 |
| 1004 | Casp9      | -1.04 |
| 1005 | Csgalnact2 | -1.04 |
| 1006 | Phtf2      | -1.04 |
| 1007 | Arl6ip5    | -1.04 |
| 1008 | Bloc1s1    | -1.04 |
| 1009 | Ptprr      | -1.04 |
| 1010 | Klf11      | -1.04 |
| 1011 | Zbtb1      | -1.04 |
| 1012 | Churc1     | -1.04 |
| 1013 | Pex6       | -1.04 |
| 1014 | Trip10     | -1.04 |
| 1015 | Inpp4a     | -1.04 |
| 1016 | Mfsd6      | -1.04 |
| 1017 | Pnkd       | -1.04 |
| 1018 | Srprb      | -1.04 |
| 1019 | Parp6      | -1.04 |

|      |          |       |
|------|----------|-------|
| 1020 | Smarcc1  | -1.04 |
| 1021 | Acap2    | -1.04 |
| 1022 | Nme1     | -1.04 |
| 1023 | Ncstn    | -1.04 |
| 1024 | Pogk     | -1.04 |
| 1025 | Csrp1    | -1.04 |
| 1026 | Pitpnb   | -1.04 |
| 1027 | Ppp1r35  | -1.04 |
| 1028 | Ppp1r35  | -1.04 |
| 1029 | Lfng     | -1.04 |
| 1030 | Tnrc18   | -1.04 |
| 1031 | Gtf2ird1 | -1.04 |
| 1032 | Pdhb     | -1.04 |
| 1033 | Zc3h13   | -1.04 |
| 1034 | Polm     | -1.04 |
| 1035 | Zfp644   | -1.04 |
| 1036 | Cdk20    | -1.04 |
| 1037 | Star     | -1.04 |
| 1038 | Pla2g15  | -1.04 |
| 1039 | Me2      | -1.04 |
| 1040 | Fam207a  | -1.05 |
| 1041 | Acta2    | -1.05 |
| 1042 | Ermp1    | -1.05 |
| 1043 | Igf2     | -1.05 |
| 1044 | Alkbh6   | -1.05 |
| 1045 | Rabac1   | -1.05 |
| 1046 | Meis3    | -1.05 |
| 1047 | Alkbh6   | -1.05 |
| 1048 | Idh3g    | -1.05 |
| 1049 | Elmo2    | -1.05 |
| 1050 | Celf1    | -1.05 |
| 1051 | Usp8     | -1.05 |
| 1052 | Atrn     | -1.05 |
| 1053 | Acss2    | -1.05 |
| 1054 | Pigt     | -1.05 |
| 1055 | Ctsa     | -1.05 |
| 1056 | Larp7    | -1.05 |
| 1057 | Atp5f1   | -1.05 |
| 1058 | Atp5f1   | -1.05 |
| 1059 | Ndufs4   | -1.05 |
| 1060 | Mfsd1    | -1.05 |

|      |              |       |
|------|--------------|-------|
| 1061 | Scamp3       | -1.05 |
| 1062 | RGD1560065   | -1.05 |
| 1063 | Nmnat1       | -1.05 |
| 1064 | Tpm2         | -1.05 |
| 1065 | Tdrd7        | -1.05 |
| 1066 | Zfp251       | -1.05 |
| 1067 | Bsg          | -1.05 |
| 1068 | Hmg20b       | -1.05 |
| 1069 | Dctn2        | -1.05 |
| 1070 | Nov          | -1.05 |
| 1071 | Kifc2        | -1.05 |
| 1072 | Gpt          | -1.05 |
| 1073 | Eif4b        | -1.05 |
| 1074 | Akt1         | -1.05 |
| 1075 | Cad          | -1.05 |
| 1076 | Twist1       | -1.05 |
| 1077 | Klf7         | -1.05 |
| 1078 | Cul5         | -1.05 |
| 1079 | Olfm2        | -1.05 |
| 1080 | Ddx6         | -1.05 |
| 1081 | Mrpl1        | -1.05 |
| 1082 | Cul4b        | -1.05 |
| 1083 | LOC100363531 | -1.05 |
| 1084 | Parp14       | -1.05 |
| 1085 | Mzt2b        | -1.05 |
| 1086 | Cluap1       | -1.05 |
| 1087 | Fxr2         | -1.05 |
| 1088 | Gdpd1        | -1.05 |
| 1089 | Nit1         | -1.05 |
| 1090 | Nit1         | -1.05 |
| 1091 | Acdbd3       | -1.05 |
| 1092 | Pycr2        | -1.05 |
| 1093 | Trrap        | -1.05 |
| 1094 | Nupl1        | -1.05 |
| 1095 | C1d          | -1.05 |
| 1096 | Art3         | -1.05 |
| 1097 | Abcg3l4      | -1.05 |
| 1098 | Pdlim3       | -1.05 |
| 1099 | RGD1566239   | -1.05 |
| 1100 | RGD1308706   | -1.05 |

|      |            |       |
|------|------------|-------|
| 1101 | MGC116121  | -1.05 |
| 1102 | Tspan15    | -1.06 |
| 1103 | Sgpl1      | -1.06 |
| 1104 | Pdss2      | -1.06 |
| 1105 | Sgms1      | -1.06 |
| 1106 | Dak        | -1.06 |
| 1107 | Igf2       | -1.06 |
| 1108 | Clptm1l    | -1.06 |
| 1109 | Qk         | -1.06 |
| 1110 | Mrpl16     | -1.06 |
| 1111 | Casp7      | -1.06 |
| 1112 | Ahcy       | -1.06 |
| 1113 | Chchd5     | -1.06 |
| 1114 | Spg11      | -1.06 |
| 1115 | Edf1       | -1.06 |
| 1116 | Ptges2     | -1.06 |
| 1117 | RGD1566320 | -1.06 |
| 1118 | Prcc       | -1.06 |
| 1119 | Zmat3      | -1.06 |
| 1120 | Hdgf       | -1.06 |
| 1121 | Mtmr11     | -1.06 |
| 1122 | Zzz3       | -1.06 |
| 1123 | Col16a1    | -1.06 |
| 1124 | Chchd3     | -1.06 |
| 1125 | Tomm7      | -1.06 |
| 1126 | Agk        | -1.06 |
| 1127 | Il17re     | -1.06 |
| 1128 | Gls2       | -1.06 |
| 1129 | Ptpr       | -1.06 |
| 1130 | Ttc7b      | -1.06 |
| 1131 | Eif3h      | -1.06 |
| 1132 | Hes6       | -1.06 |
| 1133 | Cggbp1     | -1.06 |
| 1134 | Gtpbp8     | -1.06 |
| 1135 | Txndc17    | -1.06 |
| 1136 | LOC317456  | -1.06 |
| 1137 | Baz1b      | -1.06 |
| 1138 | Ugp2       | -1.06 |
| 1139 | Tmem150c   | -1.06 |
| 1140 | Rab1a      | -1.06 |
| 1141 | Cmah       | -1.06 |

|      |            |       |
|------|------------|-------|
| 1142 | Pitrm1     | -1.06 |
| 1143 | Selk       | -1.06 |
| 1144 | Col4a1     | -1.06 |
| 1145 | Dse        | -1.07 |
| 1146 | Adarb1     | -1.07 |
| 1147 | Reep3      | -1.07 |
| 1148 | Tmem138    | -1.07 |
| 1149 | Polr2g     | -1.07 |
| 1150 | Gtf3c1     | -1.07 |
| 1151 | Hbs1l      | -1.07 |
| 1152 | Irgq       | -1.07 |
| 1153 | Ric8a      | -1.07 |
| 1154 | Klf9       | -1.07 |
| 1155 | Ptpmt1     | -1.07 |
| 1156 | Dpm2       | -1.07 |
| 1157 | Tbca       | -1.07 |
| 1158 | Ppm1l      | -1.07 |
| 1159 | Dpm3       | -1.07 |
| 1160 | Lrif1      | -1.07 |
| 1161 | Vamp3      | -1.07 |
| 1162 | Mtfr1l     | -1.07 |
| 1163 | Akr1a1     | -1.07 |
| 1164 | Rmdn1      | -1.07 |
| 1165 | Slc44a1    | -1.07 |
| 1166 | Smim12     | -1.07 |
| 1167 | Gys2       | -1.07 |
| 1168 | Lrrc61     | -1.07 |
| 1169 | Mlf2       | -1.07 |
| 1170 | Rabl2a     | -1.07 |
| 1171 | Asap1      | -1.07 |
| 1172 | Fam91a1    | -1.07 |
| 1173 | RGD1305089 | -1.07 |
| 1174 | Eef1a1     | -1.07 |
| 1175 | Herpud2    | -1.07 |
| 1176 | Mrpl3      | -1.07 |
| 1177 | Uba1       | -1.07 |
| 1178 | Elk1       | -1.07 |
| 1179 | Crkl       | -1.07 |
| 1180 | Tfg        | -1.07 |
| 1181 | Pigx       | -1.07 |
| 1182 | St6gal1    | -1.07 |

|      |         |       |
|------|---------|-------|
| 1183 | Dgcr8   | -1.07 |
| 1184 | Med24   | -1.07 |
| 1185 | Mat2b   | -1.07 |
| 1186 | Psm6    | -1.07 |
| 1187 | Synrg   | -1.07 |
| 1188 | Stard3  | -1.07 |
| 1189 | Nat9    | -1.07 |
| 1190 | Oxsm    | -1.07 |
| 1191 | Naa30   | -1.07 |
| 1192 | Naaa    | -1.07 |
| 1193 | Wfs1    | -1.07 |
| 1194 | Svil    | -1.07 |
| 1195 | Optn    | -1.07 |
| 1196 | Sugp2   | -1.07 |
| 1197 | Hmgb1   | -1.07 |
| 1198 | Cdk10   | -1.07 |
| 1199 | Fundc2  | -1.07 |
| 1200 | Ercc3   | -1.07 |
| 1201 | Adnp2   | -1.07 |
| 1202 | Adarb1  | -1.08 |
| 1203 | Adarb1  | -1.08 |
| 1204 | Adarb1  | -1.08 |
| 1205 | Cdk19   | -1.08 |
| 1206 | Cdc40   | -1.08 |
| 1207 | Bnip3   | -1.08 |
| 1208 | Pdcd5   | -1.08 |
| 1209 | Pdcd5   | -1.08 |
| 1210 | Mtrf11  | -1.08 |
| 1211 | Trmt11  | -1.08 |
| 1212 | Stx4    | -1.08 |
| 1213 | Minpp1  | -1.08 |
| 1214 | Spata2  | -1.08 |
| 1215 | Znfx1   | -1.08 |
| 1216 | Vps39   | -1.08 |
| 1217 | Creb3l1 | -1.08 |
| 1218 | Dnlz    | -1.08 |
| 1219 | Usp53   | -1.08 |
| 1220 | Scamp1  | -1.08 |
| 1221 | Xrcc4   | -1.08 |
| 1222 | Wdr41   | -1.08 |
| 1223 | Shc1    | -1.08 |



|      |          |       |
|------|----------|-------|
| 1224 | Acp6     | -1.08 |
| 1225 | Clcc1    | -1.08 |
| 1226 | Ccdc23   | -1.08 |
| 1227 | Meaf6    | -1.08 |
| 1228 | Ntf3     | -1.08 |
| 1229 | Apobec1  | -1.08 |
| 1230 | Ap1f     | -1.08 |
| 1231 | Ing3     | -1.08 |
| 1232 | Oplah    | -1.08 |
| 1233 | Gls2     | -1.08 |
| 1234 | Lrrc14   | -1.08 |
| 1235 | Seli     | -1.08 |
| 1236 | Ctsh     | -1.08 |
| 1237 | Slc9a9   | -1.08 |
| 1238 | Glb1     | -1.08 |
| 1239 | Ndufb11  | -1.08 |
| 1240 | Syap1    | -1.08 |
| 1241 | Smim11   | -1.08 |
| 1242 | Dtx3l    | -1.08 |
| 1243 | Mpg      | -1.08 |
| 1244 | Jmjd8    | -1.08 |
| 1245 | Abr      | -1.08 |
| 1246 | Tmem106a | -1.08 |
| 1247 | Acox1    | -1.08 |
| 1248 | Hn1      | -1.08 |
| 1249 | Ten1     | -1.08 |
| 1250 | Ppp2r5a  | -1.08 |
| 1251 | Ppox     | -1.08 |
| 1252 | Cfhr1    | -1.08 |
| 1253 | Kctd6    | -1.08 |
| 1254 | Mrfap1   | -1.08 |
| 1255 | Pdgfrb   | -1.08 |
| 1256 | Col6a2   | -1.09 |
| 1257 | Xpnpep1  | -1.09 |
| 1258 | Bbs1     | -1.09 |
| 1259 | Hras     | -1.09 |
| 1260 | Zfand6   | -1.09 |
| 1261 | Trpm4    | -1.09 |
| 1262 | Nomo1    | -1.09 |
| 1263 | Prkirr   | -1.09 |
| 1264 | Kat8     | -1.09 |

|      |           |       |
|------|-----------|-------|
| 1265 | Pigu      | -1.09 |
| 1266 | Ppp6c     | -1.09 |
| 1267 | Gle1      | -1.09 |
| 1268 | Ciz1      | -1.09 |
| 1269 | Cstf3     | -1.09 |
| 1270 | Mal       | -1.09 |
| 1271 | Ankef1    | -1.09 |
| 1272 | Dbndd2    | -1.09 |
| 1273 | Atg10     | -1.09 |
| 1274 | Rasa1     | -1.09 |
| 1275 | Col4a3bp  | -1.09 |
| 1276 | Rnf13     | -1.09 |
| 1277 | Ctsk      | -1.09 |
| 1278 | Agl       | -1.09 |
| 1279 | Mrpl37    | -1.09 |
| 1280 | Atg4c     | -1.09 |
| 1281 | Rpa3      | -1.09 |
| 1282 | Mrps35    | -1.09 |
| 1283 | Polr3h    | -1.09 |
| 1284 | MGC94207  | -1.09 |
| 1285 | Actr6     | -1.09 |
| 1286 | Cfd       | -1.09 |
| 1287 | Zfp347    | -1.09 |
| 1288 | LOC690617 | -1.09 |
| 1289 | Copz1     | -1.09 |
| 1290 | Vipas39   | -1.09 |
| 1291 | Med6      | -1.09 |
| 1292 | Ddx1      | -1.09 |
| 1293 | Pdia6     | -1.09 |
| 1294 | Tmem18    | -1.09 |
| 1295 | Zdhhc3    | -1.09 |
| 1296 | Tmed1     | -1.09 |
| 1297 | Prkcsh    | -1.09 |
| 1298 | Ppp2r1b   | -1.09 |
| 1299 | Scarf2    | -1.09 |
| 1300 | Kpnb1     | -1.09 |
| 1301 | Epn2      | -1.09 |
| 1302 | Eif2d     | -1.09 |
| 1303 | LOC687565 | -1.09 |
| 1304 | Plod3     | -1.09 |
| 1305 | Tecpr1    | -1.09 |

|      |            |       |
|------|------------|-------|
| 1306 | Kctd9      | -1.09 |
| 1307 | Slc22a17   | -1.09 |
| 1308 | Oxa1l      | -1.09 |
| 1309 | Morc2      | -1.09 |
| 1310 | Cln8       | -1.09 |
| 1311 | Ap3m2      | -1.09 |
| 1312 | Rxbp1      | -1.1  |
| 1313 | RGD1303003 | -1.1  |
| 1314 | Mob2       | -1.1  |
| 1315 | C1H6orf35  | -1.1  |
| 1316 | Hcfc1      | -1.1  |
| 1317 | Ipo7       | -1.1  |
| 1318 | Pik3c2a    | -1.1  |
| 1319 | Orai3      | -1.1  |
| 1320 | Zdhhc16    | -1.1  |
| 1321 | Myef2      | -1.1  |
| 1322 | RGD1306215 | -1.1  |
| 1323 | Mrpl41     | -1.1  |
| 1324 | Cks1b      | -1.1  |
| 1325 | Basp1      | -1.1  |
| 1326 | Sep-15     | -1.1  |
| 1327 | Nans       | -1.1  |
| 1328 | Hp1bp3     | -1.1  |
| 1329 | Adipor2    | -1.1  |
| 1330 | Tmem168    | -1.1  |
| 1331 | Calu       | -1.1  |
| 1332 | Calcoco1   | -1.1  |
| 1333 | Calcoco1   | -1.1  |
| 1334 | Gls2       | -1.1  |
| 1335 | Acot3      | -1.1  |
| 1336 | Aars2      | -1.1  |
| 1337 | Unc50      | -1.1  |
| 1338 | Psmc1      | -1.1  |
| 1339 | Fam46a     | -1.1  |
| 1340 | Hmgn3      | -1.1  |
| 1341 | Araf       | -1.1  |
| 1342 | Rab9a      | -1.1  |
| 1343 | Cox7b      | -1.1  |
| 1344 | Cldnd1     | -1.1  |
| 1345 | LOC688925  | -1.1  |
| 1346 | Epn2       | -1.1  |

|      |            |       |
|------|------------|-------|
| 1347 | Pigq       | -1.1  |
| 1348 | RGD1564614 | -1.1  |
| 1349 | Polr2j     | -1.1  |
| 1350 | Taf6       | -1.1  |
| 1351 | Gtf3a      | -1.1  |
| 1352 | Mbnl2      | -1.1  |
| 1353 | Prtfdc1    | -1.1  |
| 1354 | Ptpla      | -1.1  |
| 1355 | Serpinb6   | -1.1  |
| 1356 | Gpt2       | -1.1  |
| 1357 | Arl2bp     | -1.1  |
| 1358 | Fam210a    | -1.1  |
| 1359 | Gypc       | -1.1  |
| 1360 | Tmem151a   | -1.11 |
| 1361 | Tmem151a   | -1.11 |
| 1362 | Lmo1       | -1.11 |
| 1363 | Spcs2      | -1.11 |
| 1364 | Bgn        | -1.11 |
| 1365 | Fxyd3      | -1.11 |
| 1366 | Bmf        | -1.11 |
| 1367 | Mvb12b     | -1.11 |
| 1368 | Ube2e3     | -1.11 |
| 1369 | Tmem127    | -1.11 |
| 1370 | Ptgr1      | -1.11 |
| 1371 | Luzp1      | -1.11 |
| 1372 | Usp48      | -1.11 |
| 1373 | Ntf3       | -1.11 |
| 1374 | Eif4e3     | -1.11 |
| 1375 | Nup107     | -1.11 |
| 1376 | Ap3d1      | -1.11 |
| 1377 | Tmcc3      | -1.11 |
| 1378 | Rnf144a    | -1.11 |
| 1379 | Galm       | -1.11 |
| 1380 | Plin5      | -1.11 |
| 1381 | Pdcl3      | -1.11 |
| 1382 | RGD1310553 | -1.11 |
| 1383 | Sp100      | -1.11 |
| 1384 | Oxsr1      | -1.11 |
| 1385 | Arpp19     | -1.11 |
| 1386 | Abhd5      | -1.11 |
| 1387 | Ogt        | -1.11 |

|      |          |       |
|------|----------|-------|
| 1388 | Trim47   | -1.11 |
| 1389 | Psen2    | -1.11 |
| 1390 | Copa     | -1.11 |
| 1391 | Dcaf8    | -1.11 |
| 1392 | Wsb2     | -1.11 |
| 1393 | Vps33a   | -1.11 |
| 1394 | Nf2      | -1.11 |
| 1395 | Grpel1   | -1.11 |
| 1396 | Ppia     | -1.11 |
| 1397 | Nkd1     | -1.11 |
| 1398 | Tnpo2    | -1.11 |
| 1399 | Spg7     | -1.11 |
| 1400 | Rab4a    | -1.11 |
| 1401 | Usp14    | -1.11 |
| 1402 | Chchd10  | -1.12 |
| 1403 | Fxyd7    | -1.12 |
| 1404 | Atf2     | -1.12 |
| 1405 | Dnlz     | -1.12 |
| 1406 | Pdia3    | -1.12 |
| 1407 | Plcb1    | -1.12 |
| 1408 | Pmf1     | -1.12 |
| 1409 | Pi4kb    | -1.12 |
| 1410 | Extl2    | -1.12 |
| 1411 | Wdtdc1   | -1.12 |
| 1412 | Urod     | -1.12 |
| 1413 | Car8     | -1.12 |
| 1414 | Fggy     | -1.12 |
| 1415 | Leprot   | -1.12 |
| 1416 | Calu     | -1.12 |
| 1417 | Usp18    | -1.12 |
| 1418 | Cdc42ep1 | -1.12 |
| 1419 | Foxn3    | -1.12 |
| 1420 | Prkd1    | -1.12 |
| 1421 | Hdlbp    | -1.12 |
| 1422 | Nab1     | -1.12 |
| 1423 | D2hgdh   | -1.12 |
| 1424 | Hmgn3    | -1.12 |
| 1425 | Ppib     | -1.12 |
| 1426 | Polr2m   | -1.12 |
| 1427 | Myo5a    | -1.12 |
| 1428 | Scap     | -1.12 |

|      |            |       |
|------|------------|-------|
| 1429 | Fgf13      | -1.12 |
| 1430 | Chm        | -1.12 |
| 1431 | Cdk16      | -1.12 |
| 1432 | Clcn4      | -1.12 |
| 1433 | Gtf2e1     | -1.12 |
| 1434 | Pecam1     | -1.12 |
| 1435 | Mmd        | -1.12 |
| 1436 | Tor1aip2   | -1.12 |
| 1437 | Mrps14     | -1.12 |
| 1438 | Atp6v0a2   | -1.12 |
| 1439 | Extl3      | -1.12 |
| 1440 | Tmem128    | -1.12 |
| 1441 | Klhl8      | -1.12 |
| 1442 | Ctsl1      | -1.12 |
| 1443 | Ppp2cb     | -1.12 |
| 1444 | Cabin1     | -1.13 |
| 1445 | Tmem41b    | -1.13 |
| 1446 | Pex11a     | -1.13 |
| 1447 | Ubfd1      | -1.13 |
| 1448 | Ccdc101    | -1.13 |
| 1449 | Fibp       | -1.13 |
| 1450 | Stau1      | -1.13 |
| 1451 | Stau1      | -1.13 |
| 1452 | RGD1566052 | -1.13 |
| 1453 | Ism1       | -1.13 |
| 1454 | Gnas       | -1.13 |
| 1455 | Dap        | -1.13 |
| 1456 | Pmvk       | -1.13 |
| 1457 | LOC361985  | -1.13 |
| 1458 | mrpl9      | -1.13 |
| 1459 | Zmym4      | -1.13 |
| 1460 | Rassf4     | -1.13 |
| 1461 | Mrpl19     | -1.13 |
| 1462 | Tgoln2     | -1.13 |
| 1463 | Galnt11    | -1.13 |
| 1464 | Gng12      | -1.13 |
| 1465 | Prickle1   | -1.13 |
| 1466 | Josd1      | -1.13 |
| 1467 | RGD1562114 | -1.13 |
| 1468 | Laptm4b    | -1.13 |
| 1469 | Tarbp2     | -1.13 |

|      |              |       |
|------|--------------|-------|
| 1470 | LOC301124    | -1.13 |
| 1471 | Plcl1        | -1.13 |
| 1472 | Snx1         | -1.13 |
| 1473 | Sc5d         | -1.13 |
| 1474 | Rps27l       | -1.13 |
| 1475 | Elovl5       | -1.13 |
| 1476 | Rbbp7        | -1.13 |
| 1477 | Trim25       | -1.13 |
| 1478 | Serpinf1     | -1.13 |
| 1479 | Slc2a4       | -1.13 |
| 1480 | Phb          | -1.13 |
| 1481 | Ifi35        | -1.13 |
| 1482 | Mrpl38       | -1.13 |
| 1483 | Foxk2        | -1.13 |
| 1484 | Grem2        | -1.13 |
| 1485 | Cd48         | -1.13 |
| 1486 | Mospd3       | -1.13 |
| 1487 | Uqcr10       | -1.13 |
| 1488 | LOC100366030 | -1.13 |
| 1489 | Zrsr1        | -1.13 |
| 1490 | Tmem161a     | -1.13 |
| 1491 | Gipc1        | -1.13 |
| 1492 | Gadd45gip1   | -1.13 |
| 1493 | Cdk10        | -1.13 |
| 1494 | Rbm14        | -1.14 |
| 1495 | Hras         | -1.14 |
| 1496 | Thumpd1      | -1.14 |
| 1497 | Rasip1       | -1.14 |
| 1498 | Idh3B        | -1.14 |
| 1499 | Dph6         | -1.14 |
| 1500 | Tfpi         | -1.14 |
| 1501 | Usp20        | -1.14 |
| 1502 | Ssfa2        | -1.14 |
| 1503 | Gnas         | -1.14 |
| 1504 | Nln          | -1.14 |
| 1505 | Mlf1         | -1.14 |
| 1506 | B4galt2      | -1.14 |
| 1507 | Megf9        | -1.14 |
| 1508 | Tceb1        | -1.14 |
| 1509 | Tceb1        | -1.14 |

|      |          |       |
|------|----------|-------|
| 1510 | Creb3    | -1.14 |
| 1511 | Hspb11   | -1.14 |
| 1512 | Lzic     | -1.14 |
| 1513 | Galnt11  | -1.14 |
| 1514 | Atp2b1   | -1.14 |
| 1515 | Camkmt   | -1.14 |
| 1516 | Abcb6    | -1.14 |
| 1517 | S1pr2    | -1.14 |
| 1518 | Snupn    | -1.14 |
| 1519 | Xylt2    | -1.14 |
| 1520 | Ttc19    | -1.14 |
| 1521 | Srp9     | -1.14 |
| 1522 | Gusb     | -1.14 |
| 1523 | Chchd1   | -1.14 |
| 1524 | Vdac2    | -1.14 |
| 1525 | Mob1b    | -1.14 |
| 1526 | Thap6    | -1.14 |
| 1527 | Rab28    | -1.14 |
| 1528 | Fars2    | -1.14 |
| 1529 | Ly86     | -1.14 |
| 1530 | Grtp1    | -1.14 |
| 1531 | Trappc2l | -1.14 |
| 1532 | P4ha1    | -1.15 |
| 1533 | Vegfb    | -1.15 |
| 1534 | Ndufs8   | -1.15 |
| 1535 | Dhx32    | -1.15 |
| 1536 | Eif4g2   | -1.15 |
| 1537 | Tbcb     | -1.15 |
| 1538 | Hspb6    | -1.15 |
| 1539 | Lgi4     | -1.15 |
| 1540 | Lamtor1  | -1.15 |
| 1541 | Eef2k    | -1.15 |
| 1542 | Gtpbp5   | -1.15 |
| 1543 | Atp5e    | -1.15 |
| 1544 | Ciao1    | -1.15 |
| 1545 | Arl14ep  | -1.15 |
| 1546 | Mapkap1  | -1.15 |
| 1547 | Gnas     | -1.15 |
| 1548 | Prkaa1   | -1.15 |
| 1549 | Sec22b   | -1.15 |
| 1550 | Atp6v1h  | -1.15 |



|      |              |       |
|------|--------------|-------|
| 1551 | Tceb1        | -1.15 |
| 1552 | Tceb1        | -1.15 |
| 1553 | Wasf2        | -1.15 |
| 1554 | Pthlh        | -1.15 |
| 1555 | Lsm5         | -1.15 |
| 1556 | Txnrd3       | -1.15 |
| 1557 | Parp3        | -1.15 |
| 1558 | Chordc1      | -1.15 |
| 1559 | Tusc2        | -1.15 |
| 1560 | Zfp105       | -1.15 |
| 1561 | Nkap         | -1.15 |
| 1562 | Rhot1        | -1.15 |
| 1563 | Rcor3        | -1.15 |
| 1564 | Mpzl1        | -1.15 |
| 1565 | Tmem120a     | -1.15 |
| 1566 | Clip1        | -1.15 |
| 1567 | Rbm26        | -1.15 |
| 1568 | Bmp1         | -1.15 |
| 1569 | Cenpj        | -1.15 |
| 1570 | Lpar6        | -1.15 |
| 1571 | Dr1          | -1.15 |
| 1572 | Dr1          | -1.15 |
| 1573 | Tmem129      | -1.15 |
| 1574 | Uimc1        | -1.15 |
| 1575 | Mef2bnb      | -1.15 |
| 1576 | LOC100911483 | -1.15 |
| 1577 | Grtp1        | -1.15 |
| 1578 | Cfdp1        | -1.15 |
| 1579 | LOC361346    | -1.15 |
| 1580 | Lars         | -1.15 |
| 1581 | Esco1        | -1.15 |
| 1582 | Fkbpl        | -1.16 |
| 1583 | Arl3         | -1.16 |
| 1584 | Cbwd1        | -1.16 |
| 1585 | Rbm14        | -1.16 |
| 1586 | Stx1b        | -1.16 |
| 1587 | Yif1b        | -1.16 |
| 1588 | Tbcb         | -1.16 |
| 1589 | Men1         | -1.16 |
| 1590 | Nfs1         | -1.16 |

|      |          |       |
|------|----------|-------|
| 1591 | Cdk5rap1 | -1.16 |
| 1592 | Mettl5   | -1.16 |
| 1593 | Nmi      | -1.16 |
| 1594 | Phospho2 | -1.16 |
| 1595 | Nfs1     | -1.16 |
| 1596 | Pdlim5   | -1.16 |
| 1597 | Man1a2   | -1.16 |
| 1598 | Il6st    | -1.16 |
| 1599 | Tle1     | -1.16 |
| 1600 | Orc3     | -1.16 |
| 1601 | Mkln1    | -1.16 |
| 1602 | Nfu1     | -1.16 |
| 1603 | Txnrd3   | -1.16 |
| 1604 | Stk3     | -1.16 |
| 1605 | Apba3    | -1.16 |
| 1606 | Acp1     | -1.16 |
| 1607 | Cmc1     | -1.16 |
| 1608 | Apeh     | -1.16 |
| 1609 | Mras     | -1.16 |
| 1610 | Hmgn3    | -1.16 |
| 1611 | Arhgef12 | -1.16 |
| 1612 | Vps26b   | -1.16 |
| 1613 | Anapc13  | -1.16 |
| 1614 | Usp11    | -1.16 |
| 1615 | Mapk1    | -1.16 |
| 1616 | Mylk     | -1.16 |
| 1617 | Erg      | -1.16 |
| 1618 | Cygb     | -1.16 |
| 1619 | Sdf2     | -1.16 |
| 1620 | Trap1    | -1.16 |
| 1621 | Nenf     | -1.16 |
| 1622 | Stx6     | -1.16 |
| 1623 | Mad111   | -1.16 |
| 1624 | Zfp503   | -1.16 |
| 1625 | Pgm2     | -1.16 |
| 1626 | Thoc5    | -1.16 |
| 1627 | Fbxo8    | -1.16 |
| 1628 | Nr2f6    | -1.16 |
| 1629 | Zmiz1    | -1.16 |
| 1630 | Sema3g   | -1.16 |
| 1631 | Ap1g1    | -1.16 |

|      |            |       |
|------|------------|-------|
| 1632 | Anks1a     | -1.17 |
| 1633 | Actr1a     | -1.17 |
| 1634 | Galnt18    | -1.17 |
| 1635 | Lrrk1      | -1.17 |
| 1636 | Kctd15     | -1.17 |
| 1637 | Fam3a      | -1.17 |
| 1638 | Coro1b     | -1.17 |
| 1639 | Mavs       | -1.17 |
| 1640 | Lphn2      | -1.17 |
| 1641 | Lphn2      | -1.17 |
| 1642 | Igsf10     | -1.17 |
| 1643 | Zfr        | -1.17 |
| 1644 | Cryz       | -1.17 |
| 1645 | Kpna6      | -1.17 |
| 1646 | Ccdc23     | -1.17 |
| 1647 | Exoc6b     | -1.17 |
| 1648 | Hdac10     | -1.17 |
| 1649 | Ric8b      | -1.17 |
| 1650 | Moap1      | -1.17 |
| 1651 | Map4k5     | -1.17 |
| 1652 | Strn       | -1.17 |
| 1653 | Ift43      | -1.17 |
| 1654 | Ubr2       | -1.17 |
| 1655 | Wash       | -1.17 |
| 1656 | Tmsbl1     | -1.17 |
| 1657 | Eif2b5     | -1.17 |
| 1658 | Pi4ka      | -1.17 |
| 1659 | Taok1      | -1.17 |
| 1660 | Spop       | -1.17 |
| 1661 | Engase     | -1.17 |
| 1662 | Pcp4l1     | -1.17 |
| 1663 | Acbd6      | -1.17 |
| 1664 | Zfp238     | -1.17 |
| 1665 | Ap4m1      | -1.17 |
| 1666 | Erp29      | -1.17 |
| 1667 | Haus4      | -1.17 |
| 1668 | Fam107a    | -1.17 |
| 1669 | Cgrf1      | -1.17 |
| 1670 | RGD1309676 | -1.17 |
| 1671 | Qrs1       | -1.18 |
| 1672 | Rwdd1      | -1.18 |

|      |          |       |
|------|----------|-------|
| 1673 | Ppp1r3c  | -1.18 |
| 1674 | Ppp1r3c  | -1.18 |
| 1675 | Bcl7c    | -1.18 |
| 1676 | Yif1b    | -1.18 |
| 1677 | Usp47    | -1.18 |
| 1678 | Rxra     | -1.18 |
| 1679 | Cds2     | -1.18 |
| 1680 | Ndufb6   | -1.18 |
| 1681 | Tada3    | -1.18 |
| 1682 | Ptcd3    | -1.18 |
| 1683 | Retsat   | -1.18 |
| 1684 | Tia1     | -1.18 |
| 1685 | Slc25a17 | -1.18 |
| 1686 | Trip11   | -1.18 |
| 1687 | Stat1    | -1.18 |
| 1688 | Uxs1     | -1.18 |
| 1689 | Myo1b    | -1.18 |
| 1690 | Sema3b   | -1.18 |
| 1691 | Sdhd     | -1.18 |
| 1692 | Mtmr2    | -1.18 |
| 1693 | Arhgef6  | -1.18 |
| 1694 | Strada   | -1.18 |
| 1695 | Rprml    | -1.18 |
| 1696 | Golga3   | -1.18 |
| 1697 | Zfp958   | -1.18 |
| 1698 | Aldh2    | -1.18 |
| 1699 | Top2b    | -1.18 |
| 1700 | Nid2     | -1.18 |
| 1701 | Fam120a  | -1.18 |
| 1702 | Ttc13    | -1.18 |
| 1703 | Cc2d1a   | -1.18 |
| 1704 | Ogfod1   | -1.18 |
| 1705 | Dus2     | -1.18 |
| 1706 | Cox15    | -1.19 |
| 1707 | Nadsyn1  | -1.19 |
| 1708 | Mef2a    | -1.19 |
| 1709 | Akt1s1   | -1.19 |
| 1710 | Ubl4a    | -1.19 |
| 1711 | Fchsd2   | -1.19 |
| 1712 | Commd7   | -1.19 |
| 1713 | Agps     | -1.19 |

|      |            |       |
|------|------------|-------|
| 1714 | Ergic3     | -1.19 |
| 1715 | Gnas       | -1.19 |
| 1716 | Phtf1      | -1.19 |
| 1717 | Casp6      | -1.19 |
| 1718 | Tmem57     | -1.19 |
| 1719 | RGD1559904 | -1.19 |
| 1720 | Anp32b     | -1.19 |
| 1721 | Slc31a2    | -1.19 |
| 1722 | Ctnnbip1   | -1.19 |
| 1723 | Cd4        | -1.19 |
| 1724 | Tll12      | -1.19 |
| 1725 | Pla2g6     | -1.19 |
| 1726 | Pla2g6     | -1.19 |
| 1727 | Apopt1     | -1.19 |
| 1728 | Ptgr2      | -1.19 |
| 1729 | Dhx57      | -1.19 |
| 1730 | Papola     | -1.19 |
| 1731 | Mocs1      | -1.19 |
| 1732 | Atn1       | -1.19 |
| 1733 | Pms1       | -1.19 |
| 1734 | Layn       | -1.19 |
| 1735 | Arcn1      | -1.19 |
| 1736 | Sacm1l     | -1.19 |
| 1737 | Stag2      | -1.19 |
| 1738 | Apod       | -1.19 |
| 1739 | Pcyt2      | -1.19 |
| 1740 | Sumo2      | -1.19 |
| 1741 | Pla2g4a    | -1.19 |
| 1742 | Cfh        | -1.19 |
| 1743 | Vamp4      | -1.19 |
| 1744 | Pnp        | -1.19 |
| 1745 | Mrpl52     | -1.19 |
| 1746 | Yme1l1     | -1.19 |
| 1747 | Yme1l1     | -1.19 |
| 1748 | Frmd4a     | -1.19 |
| 1749 | Hsd1l      | -1.19 |
| 1750 | Maf        | -1.19 |
| 1751 | LOC288913  | -1.19 |
| 1752 | Gnpat      | -1.19 |
| 1753 | Dnajc18    | -1.19 |
| 1754 | Specc1l    | -1.2  |

|      |            |      |
|------|------------|------|
| 1755 | Cpxm2      | -1.2 |
| 1756 | Herc2      | -1.2 |
| 1757 | Cog7       | -1.2 |
| 1758 | Fam45a     | -1.2 |
| 1759 | Rcn1       | -1.2 |
| 1760 | Zbtb6      | -1.2 |
| 1761 | Rtel1      | -1.2 |
| 1762 | Fdps       | -1.2 |
| 1763 | Larp1b     | -1.2 |
| 1764 | Exosc8     | -1.2 |
| 1765 | Mib2       | -1.2 |
| 1766 | Stx12      | -1.2 |
| 1767 | RGD1559786 | -1.2 |
| 1768 | Ddost      | -1.2 |
| 1769 | LOC246295  | -1.2 |
| 1770 | RGD1308923 | -1.2 |
| 1771 | Atn1       | -1.2 |
| 1772 | Podxl2     | -1.2 |
| 1773 | St13       | -1.2 |
| 1774 | RGD1307947 | -1.2 |
| 1775 | Acp1       | -1.2 |
| 1776 | Stat1      | -1.2 |
| 1777 | Tbc1d5     | -1.2 |
| 1778 | Dis3l2     | -1.2 |
| 1779 | Mlh1       | -1.2 |
| 1780 | Tma7       | -1.2 |
| 1781 | Tma7       | -1.2 |
| 1782 | Yipf2      | -1.2 |
| 1783 | Zw10       | -1.2 |
| 1784 | Man2c1     | -1.2 |
| 1785 | Fam219b    | -1.2 |
| 1786 | Nono       | -1.2 |
| 1787 | Rbmx2      | -1.2 |
| 1788 | Cant1      | -1.2 |
| 1789 | Pcgf2      | -1.2 |
| 1790 | Prpsap2    | -1.2 |
| 1791 | Smcr8      | -1.2 |
| 1792 | Tbx2       | -1.2 |
| 1793 | Eif2ak1    | -1.2 |
| 1794 | Pcolce     | -1.2 |
| 1795 | Grsf1      | -1.2 |

|      |            |       |
|------|------------|-------|
| 1796 | Cenpc      | -1.2  |
| 1797 | Xbp1       | -1.2  |
| 1798 | Rala       | -1.2  |
| 1799 | Lamp1      | -1.2  |
| 1800 | Mrps31     | -1.2  |
| 1801 | Cep44      | -1.2  |
| 1802 | Ankrd10    | -1.2  |
| 1803 | Exoc8      | -1.2  |
| 1804 | Slc10a7    | -1.2  |
| 1805 | Atp9b      | -1.2  |
| 1806 | Fads2      | -1.21 |
| 1807 | Acsm5      | -1.21 |
| 1808 | Tufm       | -1.21 |
| 1809 | Adnp       | -1.21 |
| 1810 | Rpn2       | -1.21 |
| 1811 | Slc39a13   | -1.21 |
| 1812 | Ccbl1      | -1.21 |
| 1813 | Pcmt2      | -1.21 |
| 1814 | Hs2st1     | -1.21 |
| 1815 | Rhbg       | -1.21 |
| 1816 | Fxr1       | -1.21 |
| 1817 | Ap3b1      | -1.21 |
| 1818 | RGD1565641 | -1.21 |
| 1819 | Ndufs5     | -1.21 |
| 1820 | St3gal3    | -1.21 |
| 1821 | Tm2d1      | -1.21 |
| 1822 | Eya3       | -1.21 |
| 1823 | Rarres2    | -1.21 |
| 1824 | Slc35b4    | -1.21 |
| 1825 | Trnt1      | -1.21 |
| 1826 | Atp5g2     | -1.21 |
| 1827 | Cthrc1     | -1.21 |
| 1828 | Gsdmd      | -1.21 |
| 1829 | Ndufaf7    | -1.21 |
| 1830 | Plekha2    | -1.21 |
| 1831 | Dis3l2     | -1.21 |
| 1832 | Pgm3       | -1.21 |
| 1833 | Trip4      | -1.21 |
| 1834 | RGD1309779 | -1.21 |
| 1835 | Abcg4      | -1.21 |
| 1836 | LOC683077  | -1.21 |

|      |            |       |
|------|------------|-------|
| 1837 | Aatk       | -1.21 |
| 1838 | Ict1       | -1.21 |
| 1839 | Chmp6      | -1.21 |
| 1840 | Sdhc       | -1.21 |
| 1841 | P2rx2      | -1.21 |
| 1842 | RGD1562018 | -1.21 |
| 1843 | Smtn       | -1.21 |
| 1844 | Sec31a     | -1.21 |
| 1845 | Agtr1a     | -1.21 |
| 1846 | Fbxo25     | -1.21 |
| 1847 | Cdh5       | -1.21 |
| 1848 | Gab1       | -1.21 |
| 1849 | Ppt2       | -1.22 |
| 1850 | Gabbr1     | -1.22 |
| 1851 | Ndufv3     | -1.22 |
| 1852 | Pdzd8      | -1.22 |
| 1853 | Obfc1      | -1.22 |
| 1854 | Dkk3       | -1.22 |
| 1855 | Bscl2      | -1.22 |
| 1856 | Matn4      | -1.22 |
| 1857 | Hexb       | -1.22 |
| 1858 | Rtcd1      | -1.22 |
| 1859 | LOC691807  | -1.22 |
| 1860 | Trmt10a    | -1.22 |
| 1861 | Mmachc     | -1.22 |
| 1862 | Mycbp      | -1.22 |
| 1863 | MGC94282   | -1.22 |
| 1864 | Phf14      | -1.22 |
| 1865 | Timp3      | -1.22 |
| 1866 | Mbd3       | -1.22 |
| 1867 | Mroh1      | -1.22 |
| 1868 | Rbx1       | -1.22 |
| 1869 | Sel1l      | -1.22 |
| 1870 | Atp6v1d    | -1.22 |
| 1871 | Stk25      | -1.22 |
| 1872 | Rpe        | -1.22 |
| 1873 | Mrps10     | -1.22 |
| 1874 | Tgfbr2     | -1.22 |
| 1875 | Lingo1     | -1.22 |
| 1876 | Ube4a      | -1.22 |
| 1877 | Thyn1      | -1.22 |



|      |          |       |
|------|----------|-------|
| 1878 | Snx19    | -1.22 |
| 1879 | Gpc4     | -1.22 |
| 1880 | Gemin8   | -1.22 |
| 1881 | Rad51d   | -1.22 |
| 1882 | Tax1bp3  | -1.22 |
| 1883 | Scpep1   | -1.22 |
| 1884 | Snx8     | -1.22 |
| 1885 | Slc7a8   | -1.22 |
| 1886 | Psmb5    | -1.22 |
| 1887 | Mphosph8 | -1.22 |
| 1888 | Hr       | -1.22 |
| 1889 | Ppp3r1   | -1.22 |
| 1890 | Med28    | -1.22 |
| 1891 | Pds5a    | -1.22 |
| 1892 | Xbp1     | -1.22 |
| 1893 | Nmt2     | -1.22 |
| 1894 | Ntrk2    | -1.22 |
| 1895 | Msrb2    | -1.22 |
| 1896 | Lsm1     | -1.22 |
| 1897 | Thap1    | -1.22 |
| 1898 | Fam213a  | -1.22 |
| 1899 | Sfrp5    | -1.23 |
| 1900 | Akt2     | -1.23 |
| 1901 | Atp5g3   | -1.23 |
| 1902 | Mmadhc   | -1.23 |
| 1903 | Uck1     | -1.23 |
| 1904 | Rabl6    | -1.23 |
| 1905 | Grin1    | -1.23 |
| 1906 | Grin1    | -1.23 |
| 1907 | Dynlrb1  | -1.23 |
| 1908 | Eya2     | -1.23 |
| 1909 | Magi3    | -1.23 |
| 1910 | Ndufs6   | -1.23 |
| 1911 | Serpini1 | -1.23 |
| 1912 | Casp6    | -1.23 |
| 1913 | Tmem69   | -1.23 |
| 1914 | Gne      | -1.23 |
| 1915 | Ipp      | -1.23 |
| 1916 | Rap1gap  | -1.23 |
| 1917 | Ankrd54  | -1.23 |
| 1918 | Cthrc1   | -1.23 |

|      |           |       |
|------|-----------|-------|
| 1919 | Mterfd1   | -1.23 |
| 1920 | Shc2      | -1.23 |
| 1921 | Aco2      | -1.23 |
| 1922 | Nek9      | -1.23 |
| 1923 | Ptprm     | -1.23 |
| 1924 | Mrpl14    | -1.23 |
| 1925 | Porcn     | -1.23 |
| 1926 | Mospd2    | -1.23 |
| 1927 | Htatsf1   | -1.23 |
| 1928 | Snap29    | -1.23 |
| 1929 | Tbccd1    | -1.23 |
| 1930 | Cdc42ep4  | -1.23 |
| 1931 | Coa3      | -1.23 |
| 1932 | Luc7l3    | -1.23 |
| 1933 | Hic1      | -1.23 |
| 1934 | Tpsab1    | -1.23 |
| 1935 | Parn      | -1.23 |
| 1936 | Hcfc1r1   | -1.23 |
| 1937 | Ankfy1    | -1.23 |
| 1938 | Lpgat1    | -1.23 |
| 1939 | Usp12     | -1.23 |
| 1940 | Dynll1    | -1.23 |
| 1941 | Pkd2      | -1.23 |
| 1942 | G3bp2     | -1.23 |
| 1943 | Asb3      | -1.23 |
| 1944 | Vegfc     | -1.23 |
| 1945 | Mustn1    | -1.23 |
| 1946 | Terf2ip   | -1.23 |
| 1947 | LOC499331 | -1.24 |
| 1948 | Arl6ip1   | -1.24 |
| 1949 | Mpc1      | -1.24 |
| 1950 | Perp      | -1.24 |
| 1951 | Eml2      | -1.24 |
| 1952 | Mical2    | -1.24 |
| 1953 | mrpl11    | -1.24 |
| 1954 | Ehd1      | -1.24 |
| 1955 | Exoc6     | -1.24 |
| 1956 | Adra1d    | -1.24 |
| 1957 | Ppip5k1   | -1.24 |
| 1958 | Fkbp7     | -1.24 |
| 1959 | Grin1     | -1.24 |

|      |            |       |
|------|------------|-------|
| 1960 | Fam73b     | -1.24 |
| 1961 | Pdk1       | -1.24 |
| 1962 | Dtwd1      | -1.24 |
| 1963 | Anapc1     | -1.24 |
| 1964 | Wwtr1      | -1.24 |
| 1965 | Lysmd3     | -1.24 |
| 1966 | Dnajb14    | -1.24 |
| 1967 | Rer1       | -1.24 |
| 1968 | Klh21      | -1.24 |
| 1969 | Nr2c2      | -1.24 |
| 1970 | Ndufa5     | -1.24 |
| 1971 | Fam3c      | -1.24 |
| 1972 | Rpn1       | -1.24 |
| 1973 | Mtdh       | -1.24 |
| 1974 | Wdr60      | -1.24 |
| 1975 | Ylpm1      | -1.24 |
| 1976 | Ncoa1      | -1.24 |
| 1977 | Iah1       | -1.24 |
| 1978 | Ptprs      | -1.24 |
| 1979 | Mcam       | -1.24 |
| 1980 | Snx12      | -1.24 |
| 1981 | Ccdc65     | -1.24 |
| 1982 | Atp5o      | -1.24 |
| 1983 | Ywhae      | -1.24 |
| 1984 | Pafah1b1   | -1.24 |
| 1985 | Nth1       | -1.24 |
| 1986 | Ube3b      | -1.24 |
| 1987 | Rnf216     | -1.24 |
| 1988 | Cops6      | -1.24 |
| 1989 | RGD1304704 | -1.24 |
| 1990 | Cpne6      | -1.24 |
| 1991 | Ccdc104    | -1.24 |
| 1992 | Hmgb3      | -1.24 |
| 1993 | Uba6       | -1.24 |
| 1994 | Letm1      | -1.24 |
| 1995 | Usp34      | -1.24 |
| 1996 | Hmgb3      | -1.24 |
| 1997 | Hand2      | -1.24 |
| 1998 | Tecr       | -1.24 |
| 1999 | Pskh1      | -1.24 |
| 2000 | Atmin      | -1.24 |

|      |            |       |
|------|------------|-------|
| 2001 | Acaa2      | -1.24 |
| 2002 | RGD1562987 | -1.24 |
| 2003 | Sapcd1     | -1.25 |
| 2004 | Cyp21a1    | -1.25 |
| 2005 | Micu1      | -1.25 |
| 2006 | Rfk        | -1.25 |
| 2007 | Serpinh1   | -1.25 |
| 2008 | Thrsp      | -1.25 |
| 2009 | Mfge8      | -1.25 |
| 2010 | Phf10      | -1.25 |
| 2011 | Ptprk      | -1.25 |
| 2012 | Enpp1      | -1.25 |
| 2013 | Hrc        | -1.25 |
| 2014 | Ctf1       | -1.25 |
| 2015 | Tgfb1i1    | -1.25 |
| 2016 | Ppp1r14b   | -1.25 |
| 2017 | Fam178a    | -1.25 |
| 2018 | Dpm1       | -1.25 |
| 2019 | Cd302      | -1.25 |
| 2020 | Grin1      | -1.25 |
| 2021 | Dolpp1     | -1.25 |
| 2022 | Galk2      | -1.25 |
| 2023 | Gpr89b     | -1.25 |
| 2024 | Smim15     | -1.25 |
| 2025 | Ash1l      | -1.25 |
| 2026 | Taf13      | -1.25 |
| 2027 | C1qc       | -1.25 |
| 2028 | Fam219a    | -1.25 |
| 2029 | Pdp1       | -1.25 |
| 2030 | Pdp1       | -1.25 |
| 2031 | Nudt2      | -1.25 |
| 2032 | Tnpo3      | -1.25 |
| 2033 | Yaf2       | -1.25 |
| 2034 | RGD1359634 | -1.25 |
| 2035 | Nup37      | -1.25 |
| 2036 | Arl1       | -1.25 |
| 2037 | Ptdss1     | -1.25 |
| 2038 | Mbip       | -1.25 |
| 2039 | Mthfd1     | -1.25 |
| 2040 | Gphn       | -1.25 |
| 2041 | Mrpl14     | -1.25 |

|      |            |       |
|------|------------|-------|
| 2042 | Brcc3      | -1.25 |
| 2043 | Acsi3      | -1.25 |
| 2044 | RGD1310507 | -1.25 |
| 2045 | Rnf26      | -1.25 |
| 2046 | Kbtbd3     | -1.25 |
| 2047 | Mcam       | -1.25 |
| 2048 | Hdac8      | -1.25 |
| 2049 | Msl3       | -1.25 |
| 2050 | Atg4a1     | -1.25 |
| 2051 | Ltn1       | -1.25 |
| 2052 | Med9       | -1.25 |
| 2053 | Llg1       | -1.25 |
| 2054 | Mmgt2      | -1.25 |
| 2055 | Fh         | -1.25 |
| 2056 | RGD1309104 | -1.25 |
| 2057 | Fbxo21     | -1.25 |
| 2058 | Tyw1       | -1.25 |
| 2059 | Zdhhc4     | -1.25 |
| 2060 | Mycbp2     | -1.25 |
| 2061 | Sgcg       | -1.25 |
| 2062 | Jph4       | -1.25 |
| 2063 | Rnaseh2b   | -1.25 |
| 2064 | Add1       | -1.25 |
| 2065 | Commd8     | -1.25 |
| 2066 | Alg11      | -1.25 |
| 2067 | Prosc      | -1.25 |
| 2068 | Spcs3      | -1.25 |
| 2069 | RGD1559896 | -1.25 |
| 2070 | Tradd      | -1.25 |
| 2071 | Elmod2     | -1.25 |
| 2072 | Arsi       | -1.25 |
| 2073 | Gpr137     | -1.26 |
| 2074 | Ctbp2      | -1.26 |
| 2075 | Inpp1      | -1.26 |
| 2076 | Mfge8      | -1.26 |
| 2077 | Slc1a5     | -1.26 |
| 2078 | Rras       | -1.26 |
| 2079 | Mafb       | -1.26 |
| 2080 | Ndufa8     | -1.26 |
| 2081 | Rab14      | -1.26 |
| 2082 | Phpt1      | -1.26 |

|      |           |       |
|------|-----------|-------|
| 2083 | Ppp2r4    | -1.26 |
| 2084 | Fkbp1a    | -1.26 |
| 2085 | Ppdpf     | -1.26 |
| 2086 | Tcea2     | -1.26 |
| 2087 | P2ry14    | -1.26 |
| 2088 | Alg5      | -1.26 |
| 2089 | Krtcap2   | -1.26 |
| 2090 | Slc25a24  | -1.26 |
| 2091 | Itgb3bp   | -1.26 |
| 2092 | Pole3     | -1.26 |
| 2093 | Impad1    | -1.26 |
| 2094 | Ahdc1     | -1.26 |
| 2095 | Ergic2    | -1.26 |
| 2096 | Zfp422    | -1.26 |
| 2097 | Agap3     | -1.26 |
| 2098 | Klhdc10   | -1.26 |
| 2099 | Smarcad1  | -1.26 |
| 2100 | Zdhhc17   | -1.26 |
| 2101 | Med30     | -1.26 |
| 2102 | Cdk5r2    | -1.26 |
| 2103 | Uba7      | -1.26 |
| 2104 | Tmem45a   | -1.26 |
| 2105 | Acadvl    | -1.26 |
| 2106 | Hcfc1r1   | -1.26 |
| 2107 | Gosr1     | -1.26 |
| 2108 | LOC680254 | -1.26 |
| 2109 | Mrps17    | -1.26 |
| 2110 | Slc25a30  | -1.26 |
| 2111 | Nsd1      | -1.26 |
| 2112 | Habp4     | -1.26 |
| 2113 | LOC306766 | -1.26 |
| 2114 | Fat1      | -1.26 |
| 2115 | Colgalt1  | -1.26 |
| 2116 | Nae1      | -1.26 |
| 2117 | Smad2     | -1.26 |
| 2118 | Man1a1    | -1.27 |
| 2119 | Frmd8     | -1.27 |
| 2120 | Stk32c    | -1.27 |
| 2121 | Ndufab1   | -1.27 |
| 2122 | Cebpg     | -1.27 |
| 2123 | Mtrr      | -1.27 |

|      |          |       |
|------|----------|-------|
| 2124 | Irf2bp1  | -1.27 |
| 2125 | Numa1    | -1.27 |
| 2126 | Pc       | -1.27 |
| 2127 | As3mt    | -1.27 |
| 2128 | Tmem87b  | -1.27 |
| 2129 | Casc4    | -1.27 |
| 2130 | Dnajc19  | -1.27 |
| 2131 | Tcea3    | -1.27 |
| 2132 | Zfp46    | -1.27 |
| 2133 | Sdhd     | -1.27 |
| 2134 | Tlx2     | -1.27 |
| 2135 | Hoxa6    | -1.27 |
| 2136 | Hoxa6    | -1.27 |
| 2137 | Akr1b1   | -1.27 |
| 2138 | Wasl     | -1.27 |
| 2139 | Gfpt1    | -1.27 |
| 2140 | Frs2     | -1.27 |
| 2141 | Pcbp2    | -1.27 |
| 2142 | Ralgapa1 | -1.27 |
| 2143 | Cox7a2l  | -1.27 |
| 2144 | Heatr5b  | -1.27 |
| 2145 | Fez2     | -1.27 |
| 2146 | Gpatch11 | -1.27 |
| 2147 | Sdc1     | -1.27 |
| 2148 | Slc25a23 | -1.27 |
| 2149 | Parp16   | -1.27 |
| 2150 | Leo1     | -1.27 |
| 2151 | Hoxa6    | -1.27 |
| 2152 | Itm2a    | -1.27 |
| 2153 | Maged1   | -1.27 |
| 2154 | Dcxr     | -1.27 |
| 2155 | Ubtf     | -1.27 |
| 2156 | Proca1   | -1.27 |
| 2157 | Mpdu1    | -1.27 |
| 2158 | Tmem88   | -1.27 |
| 2159 | Crebrf   | -1.27 |
| 2160 | Gfer     | -1.27 |
| 2161 | Gm2a     | -1.27 |
| 2162 | Dars     | -1.27 |
| 2163 | Ap1s1    | -1.27 |
| 2164 | Efs      | -1.27 |

|      |           |       |
|------|-----------|-------|
| 2165 | Mettl3    | -1.27 |
| 2166 | Entpd4    | -1.27 |
| 2167 | Loxl2     | -1.27 |
| 2168 | Atp5i     | -1.27 |
| 2169 | Impad1    | -1.27 |
| 2170 | Hfe       | -1.27 |
| 2171 | Tmem59l   | -1.27 |
| 2172 | Smad2     | -1.27 |
| 2173 | Prrt1     | -1.28 |
| 2174 | Zfp91     | -1.28 |
| 2175 | Rcn3      | -1.28 |
| 2176 | Ptov1     | -1.28 |
| 2177 | Map3k4    | -1.28 |
| 2178 | Sympk     | -1.28 |
| 2179 | Bckdk     | -1.28 |
| 2180 | Cdc42bpg  | -1.28 |
| 2181 | Phf20     | -1.28 |
| 2182 | Manbal    | -1.28 |
| 2183 | Ndufaf1   | -1.28 |
| 2184 | Gtf3c5    | -1.28 |
| 2185 | Camsap1   | -1.28 |
| 2186 | Ndufaf5   | -1.28 |
| 2187 | Atp1a1    | -1.28 |
| 2188 | Arsk      | -1.28 |
| 2189 | Casq2     | -1.28 |
| 2190 | C1qb      | -1.28 |
| 2191 | LOC682988 | -1.28 |
| 2192 | Tstd2     | -1.28 |
| 2193 | Prdx1     | -1.28 |
| 2194 | Lepre1    | -1.28 |
| 2195 | Ptms      | -1.28 |
| 2196 | Pdk4      | -1.28 |
| 2197 | Snd1      | -1.28 |
| 2198 | Immt      | -1.28 |
| 2199 | Zfp638    | -1.28 |
| 2200 | Ccdc41    | -1.28 |
| 2201 | Ppp1r16a  | -1.28 |
| 2202 | Fam118a   | -1.28 |
| 2203 | Ltbp1     | -1.28 |
| 2204 | Map4k3    | -1.28 |
| 2205 | Tmx1      | -1.28 |



|      |            |       |
|------|------------|-------|
| 2206 | Ctdsp1     | -1.28 |
| 2207 | Pccb       | -1.28 |
| 2208 | Tbcel      | -1.28 |
| 2209 | Jrkl       | -1.28 |
| 2210 | Hyou1      | -1.28 |
| 2211 | Bckdhb     | -1.28 |
| 2212 | Copb2      | -1.28 |
| 2213 | Dalrd3     | -1.28 |
| 2214 | Cdk16      | -1.28 |
| 2215 | RGD1565685 | -1.28 |
| 2216 | Pls3       | -1.28 |
| 2217 | Mcts1      | -1.28 |
| 2218 | Dlg1       | -1.28 |
| 2219 | Ubtf       | -1.28 |
| 2220 | Mfap4      | -1.28 |
| 2221 | Mfap4      | -1.28 |
| 2222 | C1qtnf1    | -1.28 |
| 2223 | Shisa4     | -1.28 |
| 2224 | Sctr       | -1.28 |
| 2225 | RGD1311899 | -1.28 |
| 2226 | Cyth3      | -1.28 |
| 2227 | Cox19      | -1.28 |
| 2228 | Fbxw8      | -1.28 |
| 2229 | Cars2      | -1.28 |
| 2230 | Banp       | -1.28 |
| 2231 | Pard3      | -1.28 |
| 2232 | Sec11c     | -1.28 |
| 2233 | Sirt3      | -1.29 |
| 2234 | Mrvi1      | -1.29 |
| 2235 | Tsku       | -1.29 |
| 2236 | Slc6a8     | -1.29 |
| 2237 | RGD1308428 | -1.29 |
| 2238 | Bcam       | -1.29 |
| 2239 | Gtf2h5     | -1.29 |
| 2240 | Zfp180     | -1.29 |
| 2241 | Fbxl19     | -1.29 |
| 2242 | Kif3b      | -1.29 |
| 2243 | Flrt3      | -1.29 |
| 2244 | Pkig       | -1.29 |
| 2245 | Pex2       | -1.29 |
| 2246 | Sike1      | -1.29 |

|      |           |       |
|------|-----------|-------|
| 2247 | Ssx2ip    | -1.29 |
| 2248 | Ak2       | -1.29 |
| 2249 | Mical3    | -1.29 |
| 2250 | Wnk1      | -1.29 |
| 2251 | Wnk1      | -1.29 |
| 2252 | Lsm3      | -1.29 |
| 2253 | Mtpn      | -1.29 |
| 2254 | Atp6v1b1  | -1.29 |
| 2255 | Nagk      | -1.29 |
| 2256 | Nptxr     | -1.29 |
| 2257 | Tmem229b  | -1.29 |
| 2258 | Exd2      | -1.29 |
| 2259 | Scly      | -1.29 |
| 2260 | Zbtb38    | -1.29 |
| 2261 | LOC689959 | -1.29 |
| 2262 | Hyou1     | -1.29 |
| 2263 | Sod1      | -1.29 |
| 2264 | Ccng1     | -1.29 |
| 2265 | Rhot2     | -1.29 |
| 2266 | Abcc1     | -1.29 |
| 2267 | Nudt16l1  | -1.29 |
| 2268 | Dbi       | -1.29 |
| 2269 | Kdsr      | -1.29 |
| 2270 | F11r      | -1.29 |
| 2271 | Parp1     | -1.29 |
| 2272 | Fam149b1  | -1.29 |
| 2273 | Thtpa     | -1.29 |
| 2274 | Ociad1    | -1.29 |
| 2275 | Sephs1    | -1.29 |
| 2276 | Atp5c1    | -1.29 |
| 2277 | Dctn6     | -1.29 |
| 2278 | Hsbp1     | -1.29 |
| 2279 | Zfp532    | -1.29 |
| 2280 | Hsf2      | -1.3  |
| 2281 | Arf3      | -1.3  |
| 2282 | H19       | -1.3  |
| 2283 | Mrv1      | -1.3  |
| 2284 | Inpp1     | -1.3  |
| 2285 | Dact3     | -1.3  |
| 2286 | Zfp180    | -1.3  |
| 2287 | F8a1      | -1.3  |

|      |           |      |
|------|-----------|------|
| 2288 | Clns1a    | -1.3 |
| 2289 | Secisbp2l | -1.3 |
| 2290 | Lpcat4    | -1.3 |
| 2291 | Plcg1     | -1.3 |
| 2292 | Mrps21    | -1.3 |
| 2293 | Mecom     | -1.3 |
| 2294 | Cast      | -1.3 |
| 2295 | Golph3l   | -1.3 |
| 2296 | Vwa1      | -1.3 |
| 2297 | Rere      | -1.3 |
| 2298 | LOC685391 | -1.3 |
| 2299 | Oxr1      | -1.3 |
| 2300 | Ehd3      | -1.3 |
| 2301 | Ppp1r36   | -1.3 |
| 2302 | Mpp5      | -1.3 |
| 2303 | Fert2     | -1.3 |
| 2304 | Nudt16    | -1.3 |
| 2305 | Eepd1     | -1.3 |
| 2306 | Ccdc51    | -1.3 |
| 2307 | Elp6      | -1.3 |
| 2308 | Arf3      | -1.3 |
| 2309 | Tnk2      | -1.3 |
| 2310 | Comt      | -1.3 |
| 2311 | Smarcd2   | -1.3 |
| 2312 | Ccdc43    | -1.3 |
| 2313 | Sgca      | -1.3 |
| 2314 | Myo1d     | -1.3 |
| 2315 | Tefm      | -1.3 |
| 2316 | Ulk2      | -1.3 |
| 2317 | Fahd1     | -1.3 |
| 2318 | Mapk9     | -1.3 |
| 2319 | Skp1      | -1.3 |
| 2320 | Tubg1     | -1.3 |
| 2321 | Ccdc181   | -1.3 |
| 2322 | Mepce     | -1.3 |
| 2323 | Mepce     | -1.3 |
| 2324 | Pebp1     | -1.3 |
| 2325 | Selm      | -1.3 |
| 2326 | Mrpl32    | -1.3 |
| 2327 | Zfp709    | -1.3 |
| 2328 | Fnta      | -1.3 |

|      |           |       |
|------|-----------|-------|
| 2329 | Fra10ac1  | -1.31 |
| 2330 | Rps6ka4   | -1.31 |
| 2331 | Pgap2     | -1.31 |
| 2332 | Lym1      | -1.31 |
| 2333 | Shoc2     | -1.31 |
| 2334 | Pltp      | -1.31 |
| 2335 | Jph2      | -1.31 |
| 2336 | Meis2     | -1.31 |
| 2337 | Ssna1     | -1.31 |
| 2338 | Lgr4      | -1.31 |
| 2339 | Tti1      | -1.31 |
| 2340 | Kcnc4     | -1.31 |
| 2341 | Ecm1      | -1.31 |
| 2342 | Ift80     | -1.31 |
| 2343 | Rarres1   | -1.31 |
| 2344 | Cast      | -1.31 |
| 2345 | Mllt3     | -1.31 |
| 2346 | Lypla1    | -1.31 |
| 2347 | Tm7sf3    | -1.31 |
| 2348 | Wnk1      | -1.31 |
| 2349 | Ndufa4    | -1.31 |
| 2350 | Tmem60    | -1.31 |
| 2351 | Tmem150a  | -1.31 |
| 2352 | Arl8b     | -1.31 |
| 2353 | Ndufa9    | -1.31 |
| 2354 | Ndufa6    | -1.31 |
| 2355 | Sep-03    | -1.31 |
| 2356 | Creb1     | -1.31 |
| 2357 | Mitd1     | -1.31 |
| 2358 | Cd2ap     | -1.31 |
| 2359 | LOC367117 | -1.31 |
| 2360 | Lppr2     | -1.31 |
| 2361 | Bcl9l     | -1.31 |
| 2362 | M6pr      | -1.31 |
| 2363 | Cadm2     | -1.31 |
| 2364 | Mlst8     | -1.31 |
| 2365 | B9d1      | -1.31 |
| 2366 | B9d1      | -1.31 |
| 2367 | Akt3      | -1.31 |
| 2368 | Lamc1     | -1.31 |
| 2369 | Daglb     | -1.31 |

|      |            |       |
|------|------------|-------|
| 2370 | Eln        | -1.31 |
| 2371 | Fam69a     | -1.31 |
| 2372 | Rhbdd3     | -1.31 |
| 2373 | Lgals8     | -1.31 |
| 2374 | Pcm1       | -1.31 |
| 2375 | Fam116a    | -1.31 |
| 2376 | LOC679149  | -1.31 |
| 2377 | Dctn4      | -1.31 |
| 2378 | Plekha4    | -1.32 |
| 2379 | Ganab      | -1.32 |
| 2380 | Tnks2      | -1.32 |
| 2381 | Tnks2      | -1.32 |
| 2382 | Cast       | -1.32 |
| 2383 | Smim15     | -1.32 |
| 2384 | Xpa        | -1.32 |
| 2385 | Eva1b      | -1.32 |
| 2386 | Spryd3     | -1.32 |
| 2387 | Cpt1b      | -1.32 |
| 2388 | Mapk11     | -1.32 |
| 2389 | Txn2       | -1.32 |
| 2390 | R3hdm2     | -1.32 |
| 2391 | Oxr1       | -1.32 |
| 2392 | Samm50     | -1.32 |
| 2393 | Ttc38      | -1.32 |
| 2394 | Snx17      | -1.32 |
| 2395 | Adcy3      | -1.32 |
| 2396 | Snx13      | -1.32 |
| 2397 | Creb1      | -1.32 |
| 2398 | RGD1311745 | -1.32 |
| 2399 | Cyb561d2   | -1.32 |
| 2400 | Glyctk     | -1.32 |
| 2401 | Yap1       | -1.32 |
| 2402 | Swsap1     | -1.32 |
| 2403 | Pcbp4      | -1.32 |
| 2404 | Tmem45a    | -1.32 |
| 2405 | Fam162a    | -1.32 |
| 2406 | Abcc5      | -1.32 |
| 2407 | Npepps     | -1.32 |
| 2408 | Poldip2    | -1.32 |
| 2409 | Slc25a11   | -1.32 |
| 2410 | Pfas       | -1.32 |

|      |          |       |
|------|----------|-------|
| 2411 | Fln      | -1.32 |
| 2412 | Nmral1   | -1.32 |
| 2413 | Rpusd1   | -1.32 |
| 2414 | Ap2b1    | -1.32 |
| 2415 | Tubg2    | -1.32 |
| 2416 | Nbr1     | -1.32 |
| 2417 | Kctd3    | -1.32 |
| 2418 | Smyd2    | -1.32 |
| 2419 | Kctd10   | -1.32 |
| 2420 | Kif13b   | -1.32 |
| 2421 | Wdr82    | -1.32 |
| 2422 | Eci2     | -1.32 |
| 2423 | Pfkfb3   | -1.32 |
| 2424 | Npy1r    | -1.32 |
| 2425 | Spcs1    | -1.32 |
| 2426 | Gcsh     | -1.32 |
| 2427 | Tmem231  | -1.32 |
| 2428 | Rnaseh2a | -1.32 |
| 2429 | Ablim3   | -1.32 |
| 2430 | Pias2    | -1.32 |
| 2431 | Tubb5    | -1.33 |
| 2432 | Banf1    | -1.33 |
| 2433 | Nsmce4a  | -1.33 |
| 2434 | Plekhf1  | -1.33 |
| 2435 | Grik5    | -1.33 |
| 2436 | Mgmt     | -1.33 |
| 2437 | Prpf19   | -1.33 |
| 2438 | Sfr1     | -1.33 |
| 2439 | Dpp7     | -1.33 |
| 2440 | Pacsin3  | -1.33 |
| 2441 | Tyro3    | -1.33 |
| 2442 | Fam173b  | -1.33 |
| 2443 | Ndufb5   | -1.33 |
| 2444 | Acad9    | -1.33 |
| 2445 | Gfm1     | -1.33 |
| 2446 | Gnb1     | -1.33 |
| 2447 | Recql    | -1.33 |
| 2448 | Uba3     | -1.33 |
| 2449 | Pon2     | -1.33 |
| 2450 | Scube1   | -1.33 |
| 2451 | Top1mt   | -1.33 |

|      |           |       |
|------|-----------|-------|
| 2452 | Ccdc176   | -1.33 |
| 2453 | Wdr35l    | -1.33 |
| 2454 | Mnat1     | -1.33 |
| 2455 | Ralbp1    | -1.33 |
| 2456 | Thap4     | -1.33 |
| 2457 | Mrpl2     | -1.33 |
| 2458 | Acy1      | -1.33 |
| 2459 | Alg9      | -1.33 |
| 2460 | Hmg20a    | -1.33 |
| 2461 | Lysmd2    | -1.33 |
| 2462 | Armcx6    | -1.33 |
| 2463 | Cask      | -1.33 |
| 2464 | Opa1      | -1.33 |
| 2465 | Rnf168    | -1.33 |
| 2466 | Hmgn1     | -1.33 |
| 2467 | Hmgn1     | -1.33 |
| 2468 | Fam86a    | -1.33 |
| 2469 | Ace       | -1.33 |
| 2470 | Tipr1     | -1.33 |
| 2471 | Tmco1     | -1.33 |
| 2472 | Tmco1     | -1.33 |
| 2473 | Gal3st4   | -1.33 |
| 2474 | Fut11     | -1.33 |
| 2475 | Gfra2     | -1.33 |
| 2476 | Polr2b    | -1.33 |
| 2477 | Sparcl1   | -1.33 |
| 2478 | LOC680039 | -1.33 |
| 2479 | Rtn4      | -1.33 |
| 2480 | Nat1      | -1.33 |
| 2481 | Capn7     | -1.33 |
| 2482 | Mlycd     | -1.33 |
| 2483 | Celf4     | -1.33 |
| 2484 | Nudt3     | -1.34 |
| 2485 | Agpat1    | -1.34 |
| 2486 | Bicc1     | -1.34 |
| 2487 | Ank3      | -1.34 |
| 2488 | Fkbp2     | -1.34 |
| 2489 | Tpp1      | -1.34 |
| 2490 | Mrpl18    | -1.34 |
| 2491 | Lix1      | -1.34 |
| 2492 | Ssc5d     | -1.34 |

|      |            |       |
|------|------------|-------|
| 2493 | Map6       | -1.34 |
| 2494 | Timm10b    | -1.34 |
| 2495 | Hirip3     | -1.34 |
| 2496 | Tacc2      | -1.34 |
| 2497 | Bloc1s6    | -1.34 |
| 2498 | Mrps21     | -1.34 |
| 2499 | Rapgef2    | -1.34 |
| 2500 | Gyg1       | -1.34 |
| 2501 | Cox7c      | -1.34 |
| 2502 | RGD1561149 | -1.34 |
| 2503 | Zfyve9     | -1.34 |
| 2504 | Aldh4a1    | -1.34 |
| 2505 | Atp6v1e1   | -1.34 |
| 2506 | Gstk1      | -1.34 |
| 2507 | Yeats4     | -1.34 |
| 2508 | Mum1       | -1.34 |
| 2509 | Pip5k1c    | -1.34 |
| 2510 | Pip5k1c    | -1.34 |
| 2511 | Lum        | -1.34 |
| 2512 | Oxr1       | -1.34 |
| 2513 | Tab1       | -1.34 |
| 2514 | Btbd7      | -1.34 |
| 2515 | Pigh       | -1.34 |
| 2516 | Lrpprc     | -1.34 |
| 2517 | Mrps18a    | -1.34 |
| 2518 | Trem2      | -1.34 |
| 2519 | Ndufb3     | -1.34 |
| 2520 | Mrpl44     | -1.34 |
| 2521 | Vps11      | -1.34 |
| 2522 | Gsta4      | -1.34 |
| 2523 | Taf9b      | -1.34 |
| 2524 | Smc1a      | -1.34 |
| 2525 | Sst        | -1.34 |
| 2526 | Mrpl40     | -1.34 |
| 2527 | Rhbdf1     | -1.34 |
| 2528 | Mapk9      | -1.34 |
| 2529 | Vamp2      | -1.34 |
| 2530 | Tmem199    | -1.34 |
| 2531 | Nkiras2    | -1.34 |
| 2532 | Dcaf7      | -1.34 |
| 2533 | Zfp68      | -1.34 |



|      |            |       |
|------|------------|-------|
| 2534 | Mrps18c    | -1.34 |
| 2535 | Dusp22     | -1.34 |
| 2536 | Cdc123     | -1.34 |
| 2537 | Ces1       | -1.34 |
| 2538 | Ces1f      | -1.34 |
| 2539 | Ppic       | -1.34 |
| 2540 | Ndfip1     | -1.34 |
| 2541 | Atp5a1     | -1.34 |
| 2542 | Fam204a    | -1.35 |
| 2543 | Aip        | -1.35 |
| 2544 | Fam53b     | -1.35 |
| 2545 | Oat        | -1.35 |
| 2546 | Brd9       | -1.35 |
| 2547 | Josd2      | -1.35 |
| 2548 | Nrxn2      | -1.35 |
| 2549 | LOC690349  | -1.35 |
| 2550 | Gsto1      | -1.35 |
| 2551 | Ddrk1      | -1.35 |
| 2552 | Duoxa1     | -1.35 |
| 2553 | Ndufs3     | -1.35 |
| 2554 | Dab2ip     | -1.35 |
| 2555 | Aplnr      | -1.35 |
| 2556 | Gstm4      | -1.35 |
| 2557 | Ankh       | -1.35 |
| 2558 | Ppcs       | -1.35 |
| 2559 | Cachd1     | -1.35 |
| 2560 | RGD1310313 | -1.35 |
| 2561 | Ak2        | -1.35 |
| 2562 | Pole4      | -1.35 |
| 2563 | Bcl2l13    | -1.35 |
| 2564 | Cmas       | -1.35 |
| 2565 | Uqcrb      | -1.35 |
| 2566 | Uqcr11     | -1.35 |
| 2567 | Uqcr11     | -1.35 |
| 2568 | Zfp955a    | -1.35 |
| 2569 | Slc6a15    | -1.35 |
| 2570 | Spast      | -1.35 |
| 2571 | Mta1       | -1.35 |
| 2572 | Ndufv2     | -1.35 |
| 2573 | Tspan3     | -1.35 |
| 2574 | Col5a3     | -1.35 |

|      |            |       |
|------|------------|-------|
| 2575 | Rpusd4     | -1.35 |
| 2576 | Fam214a    | -1.35 |
| 2577 | Stag1      | -1.35 |
| 2578 | Golga4     | -1.35 |
| 2579 | Pdzd11     | -1.35 |
| 2580 | Rab33a     | -1.35 |
| 2581 | Poglut1    | -1.35 |
| 2582 | Atp5j      | -1.35 |
| 2583 | Vtn        | -1.35 |
| 2584 | Fam195a    | -1.35 |
| 2585 | Tsc2       | -1.35 |
| 2586 | Pld2       | -1.35 |
| 2587 | Cacybp     | -1.35 |
| 2588 | Arl8a      | -1.35 |
| 2589 | Zfp68      | -1.35 |
| 2590 | Mrps16     | -1.35 |
| 2591 | Nudcd3     | -1.35 |
| 2592 | Zmynd11    | -1.35 |
| 2593 | Zfp346     | -1.35 |
| 2594 | Dip2c      | -1.35 |
| 2595 | RGD1311747 | -1.35 |
| 2596 | Dcun1d2    | -1.35 |
| 2597 | Mbtps1     | -1.35 |
| 2598 | Ctxn3      | -1.35 |
| 2599 | Ranbp6     | -1.36 |
| 2600 | Fkbp2      | -1.36 |
| 2601 | Hmgn5      | -1.36 |
| 2602 | Hmgn5b     | -1.36 |
| 2603 | Ints4      | -1.36 |
| 2604 | Slc2a10    | -1.36 |
| 2605 | Tars2      | -1.36 |
| 2606 | F2r        | -1.36 |
| 2607 | Fgf10      | -1.36 |
| 2608 | Paip1      | -1.36 |
| 2609 | Park7      | -1.36 |
| 2610 | Col15a1    | -1.36 |
| 2611 | Vezt       | -1.36 |
| 2612 | Tpgs1      | -1.36 |
| 2613 | Igfbp6     | -1.36 |
| 2614 | Pnkd       | -1.36 |
| 2615 | LOC500948  | -1.36 |

|      |           |       |
|------|-----------|-------|
| 2616 | Cilp      | -1.36 |
| 2617 | Fam96a    | -1.36 |
| 2618 | Mst1      | -1.36 |
| 2619 | Hmgn5     | -1.36 |
| 2620 | Eif1ax    | -1.36 |
| 2621 | Cryzl1    | -1.36 |
| 2622 | Nr1d1     | -1.36 |
| 2623 | Aspa      | -1.36 |
| 2624 | Tnfsf13   | -1.36 |
| 2625 | Adamts2   | -1.36 |
| 2626 | Myo18a    | -1.36 |
| 2627 | Snf8      | -1.36 |
| 2628 | Gaa       | -1.36 |
| 2629 | Micu2     | -1.36 |
| 2630 | Ptprg     | -1.36 |
| 2631 | Jakmip1   | -1.36 |
| 2632 | Stim2     | -1.36 |
| 2633 | Zmynd11   | -1.36 |
| 2634 | Cap2      | -1.36 |
| 2635 | LOC500028 | -1.36 |
| 2636 | Ldb3      | -1.36 |
| 2637 | Aldh7a1   | -1.36 |
| 2638 | Camk2a    | -1.36 |
| 2639 | Gda       | -1.37 |
| 2640 | Polg      | -1.37 |
| 2641 | Zfp111    | -1.37 |
| 2642 | Fuca2     | -1.37 |
| 2643 | Renbp     | -1.37 |
| 2644 | Pde3b     | -1.37 |
| 2645 | Rbbp9     | -1.37 |
| 2646 | Fibin     | -1.37 |
| 2647 | Tcp11l1   | -1.37 |
| 2648 | Stam2     | -1.37 |
| 2649 | Spopl     | -1.37 |
| 2650 | Zranb2    | -1.37 |
| 2651 | Kif2c     | -1.37 |
| 2652 | Chmp5     | -1.37 |
| 2653 | Mtor      | -1.37 |
| 2654 | Eogt      | -1.37 |
| 2655 | Pigy      | -1.37 |
| 2656 | Ggcx      | -1.37 |

|      |            |       |
|------|------------|-------|
| 2657 | Pde3a      | -1.37 |
| 2658 | Ankrd52    | -1.37 |
| 2659 | Cdk4       | -1.37 |
| 2660 | Stap2      | -1.37 |
| 2661 | Mrps9      | -1.37 |
| 2662 | Pknox2     | -1.37 |
| 2663 | Elof1      | -1.37 |
| 2664 | Praf2      | -1.37 |
| 2665 | Pvrl3      | -1.37 |
| 2666 | Dirc2      | -1.37 |
| 2667 | Pkd1       | -1.37 |
| 2668 | Glrx2      | -1.37 |
| 2669 | Slamf9     | -1.37 |
| 2670 | Mdh1       | -1.37 |
| 2671 | Ykt6       | -1.37 |
| 2672 | Rsu1       | -1.37 |
| 2673 | Pfcp       | -1.37 |
| 2674 | Zmynd11    | -1.37 |
| 2675 | Gdf1       | -1.37 |
| 2676 | Vdac3      | -1.37 |
| 2677 | Cmtm3      | -1.37 |
| 2678 | Slc25a46   | -1.37 |
| 2679 | Elp2       | -1.37 |
| 2680 | Ndufv3     | -1.38 |
| 2681 | Pcbp3      | -1.38 |
| 2682 | Gstt3      | -1.38 |
| 2683 | Vps13a     | -1.38 |
| 2684 | Tmem147    | -1.38 |
| 2685 | Hsd3b7     | -1.38 |
| 2686 | Psm5       | -1.38 |
| 2687 | Cacfd1     | -1.38 |
| 2688 | RGD1359508 | -1.38 |
| 2689 | Manba      | -1.38 |
| 2690 | Hint2      | -1.38 |
| 2691 | Pex10      | -1.38 |
| 2692 | MGC94282   | -1.38 |
| 2693 | Erc1       | -1.38 |
| 2694 | Necap1     | -1.38 |
| 2695 | Desi1      | -1.38 |
| 2696 | Zfp706     | -1.38 |
| 2697 | Lrp1       | -1.38 |

|      |         |       |
|------|---------|-------|
| 2698 | Rbms2   | -1.38 |
| 2699 | Bbs10   | -1.38 |
| 2700 | Efr3a   | -1.38 |
| 2701 | Lgals1  | -1.38 |
| 2702 | Slc5a6  | -1.38 |
| 2703 | Slc39a9 | -1.38 |
| 2704 | Pknox2  | -1.38 |
| 2705 | Slc37a4 | -1.38 |
| 2706 | Zcchc12 | -1.38 |
| 2707 | Cpped1  | -1.38 |
| 2708 | Mapk9   | -1.38 |
| 2709 | Capn2   | -1.38 |
| 2710 | Msra    | -1.38 |
| 2711 | N6amt2  | -1.38 |
| 2712 | Slain2  | -1.38 |
| 2713 | Tmem110 | -1.38 |
| 2714 | Polb    | -1.38 |
| 2715 | Fam65a  | -1.38 |
| 2716 | Pfdn1   | -1.38 |
| 2717 | Snx2    | -1.38 |
| 2718 | Fmr1    | -1.39 |
| 2719 | Ppfibp2 | -1.39 |
| 2720 | Efcab4a | -1.39 |
| 2721 | Efcab4a | -1.39 |
| 2722 | Dpp4    | -1.39 |
| 2723 | Rbm45   | -1.39 |
| 2724 | Angpt4  | -1.39 |
| 2725 | Ostc    | -1.39 |
| 2726 | Ttc14   | -1.39 |
| 2727 | Zmym6   | -1.39 |
| 2728 | Asb8    | -1.39 |
| 2729 | Nrbp2   | -1.39 |
| 2730 | Fbln1   | -1.39 |
| 2731 | Entpd5  | -1.39 |
| 2732 | Kdelc1  | -1.39 |
| 2733 | Lmbrd1  | -1.39 |
| 2734 | Asnsd1  | -1.39 |
| 2735 | Sep-02  | -1.39 |
| 2736 | Acpl2   | -1.39 |
| 2737 | Ptplad1 | -1.39 |
| 2738 | Rab3d   | -1.39 |

|      |          |       |
|------|----------|-------|
| 2739 | Aasdhppt | -1.39 |
| 2740 | Hyal1    | -1.39 |
| 2741 | Slc25a20 | -1.39 |
| 2742 | Spink8   | -1.39 |
| 2743 | Cpox     | -1.39 |
| 2744 | St3gal6  | -1.39 |
| 2745 | Nr1d1    | -1.39 |
| 2746 | Atpaf2   | -1.39 |
| 2747 | Tbc1d9b  | -1.39 |
| 2748 | Rpain    | -1.39 |
| 2749 | Tob1     | -1.39 |
| 2750 | Higd1b   | -1.39 |
| 2751 | Atp1a4   | -1.39 |
| 2752 | Atp1a4   | -1.39 |
| 2753 | Dars2    | -1.39 |
| 2754 | Usp30    | -1.39 |
| 2755 | Exoc5    | -1.39 |
| 2756 | Zfp385d  | -1.39 |
| 2757 | Smim20   | -1.39 |
| 2758 | Zmynd11  | -1.39 |
| 2759 | Id4      | -1.39 |
| 2760 | Hsf4     | -1.39 |
| 2761 | Timm21   | -1.39 |
| 2762 | Cdh2     | -1.39 |
| 2763 | Mib1     | -1.39 |
| 2764 | Pcbd1    | -1.4  |
| 2765 | Ms4a2    | -1.4  |
| 2766 | Cyfip1   | -1.4  |
| 2767 | Nars2    | -1.4  |
| 2768 | Ctr9     | -1.4  |
| 2769 | Inpp5f   | -1.4  |
| 2770 | Stx16    | -1.4  |
| 2771 | Vps45    | -1.4  |
| 2772 | Mmp23    | -1.4  |
| 2773 | Kif2c    | -1.4  |
| 2774 | Stx17    | -1.4  |
| 2775 | Leprel2  | -1.4  |
| 2776 | Rassf8   | -1.4  |
| 2777 | Arsa     | -1.4  |
| 2778 | Hrsp12   | -1.4  |
| 2779 | Atp5b    | -1.4  |

|      |            |       |
|------|------------|-------|
| 2780 | Nsmce2     | -1.4  |
| 2781 | Wdfy1      | -1.4  |
| 2782 | Cnnm3      | -1.4  |
| 2783 | Pomgnt2    | -1.4  |
| 2784 | Tmem185a   | -1.4  |
| 2785 | Trappc4    | -1.4  |
| 2786 | Nsf        | -1.4  |
| 2787 | Pam16      | -1.4  |
| 2788 | RGD1307155 | -1.4  |
| 2789 | Dhx9       | -1.4  |
| 2790 | Timm44     | -1.4  |
| 2791 | Rnf215     | -1.4  |
| 2792 | Naa35      | -1.4  |
| 2793 | Txndc5     | -1.4  |
| 2794 | Ufsp2      | -1.4  |
| 2795 | Mvd        | -1.4  |
| 2796 | Got2       | -1.4  |
| 2797 | Galnt2     | -1.4  |
| 2798 | Sdha       | -1.41 |
| 2799 | Adcy2      | -1.41 |
| 2800 | Rps6ka2    | -1.41 |
| 2801 | Alg8       | -1.41 |
| 2802 | Paox       | -1.41 |
| 2803 | Plce1      | -1.41 |
| 2804 | Dolk       | -1.41 |
| 2805 | Bicap      | -1.41 |
| 2806 | Cse1l      | -1.41 |
| 2807 | Hax1       | -1.41 |
| 2808 | Hey1       | -1.41 |
| 2809 | Eif2a      | -1.41 |
| 2810 | Kat3       | -1.41 |
| 2811 | Man1c1     | -1.41 |
| 2812 | Fabp3      | -1.41 |
| 2813 | Akr7a2     | -1.41 |
| 2814 | RGD1311164 | -1.41 |
| 2815 | Gtpbp10    | -1.41 |
| 2816 | Mrpl51     | -1.41 |
| 2817 | Tspan31    | -1.41 |
| 2818 | Ilvbl      | -1.41 |
| 2819 | Dcaf4      | -1.41 |
| 2820 | Prkd3      | -1.41 |

|      |          |       |
|------|----------|-------|
| 2821 | Smoc1    | -1.41 |
| 2822 | Tmem237  | -1.41 |
| 2823 | Tmem182  | -1.41 |
| 2824 | Cyp20a1  | -1.41 |
| 2825 | Armc9    | -1.41 |
| 2826 | Etfa     | -1.41 |
| 2827 | Rexo2    | -1.41 |
| 2828 | Keap1    | -1.41 |
| 2829 | Jade2    | -1.41 |
| 2830 | Tbcd     | -1.41 |
| 2831 | Rnf34    | -1.41 |
| 2832 | Gmfb     | -1.41 |
| 2833 | Dnase1l3 | -1.41 |
| 2834 | Mipep    | -1.41 |
| 2835 | Zfp395   | -1.41 |
| 2836 | Farp1    | -1.41 |
| 2837 | Aebp1    | -1.41 |
| 2838 | Commd3   | -1.41 |
| 2839 | Vps36    | -1.41 |
| 2840 | Rwdd4    | -1.41 |
| 2841 | Tusc3    | -1.41 |
| 2842 | Efnb2    | -1.41 |
| 2843 | St3gal2  | -1.41 |
| 2844 | Vps4a    | -1.41 |
| 2845 | Matr3    | -1.41 |
| 2846 | Pcdha8   | -1.41 |
| 2847 | Pcdha10  | -1.41 |
| 2848 | Ssh3     | -1.42 |
| 2849 | Slx1b    | -1.42 |
| 2850 | Btd1     | -1.42 |
| 2851 | Megf8    | -1.42 |
| 2852 | Gys1     | -1.42 |
| 2853 | Tmem143  | -1.42 |
| 2854 | Dctn5    | -1.42 |
| 2855 | Plekha1  | -1.42 |
| 2856 | Ralgapb  | -1.42 |
| 2857 | Mtch2    | -1.42 |
| 2858 | Npepl1   | -1.42 |
| 2859 | Fabp4    | -1.42 |
| 2860 | Celf3    | -1.42 |
| 2861 | Prkab2   | -1.42 |



|      |            |       |
|------|------------|-------|
| 2862 | Dram2      | -1.42 |
| 2863 | RGD1564804 | -1.42 |
| 2864 | Cops7a     | -1.42 |
| 2865 | Suclg2     | -1.42 |
| 2866 | Amigo2     | -1.42 |
| 2867 | Mrpl42     | -1.42 |
| 2868 | Laptm4a    | -1.42 |
| 2869 | Brms1l     | -1.42 |
| 2870 | Chga       | -1.42 |
| 2871 | Il18       | -1.42 |
| 2872 | Nprl2      | -1.42 |
| 2873 | Zdhhc9     | -1.42 |
| 2874 | Tceal8     | -1.42 |
| 2875 | Zdhhc8     | -1.42 |
| 2876 | Nde1       | -1.42 |
| 2877 | Mfsd11     | -1.42 |
| 2878 | Dnm3       | -1.42 |
| 2879 | Mcpt1      | -1.42 |
| 2880 | Usp46      | -1.42 |
| 2881 | Rfc1       | -1.42 |
| 2882 | Slc27a1    | -1.42 |
| 2883 | Phkb       | -1.42 |
| 2884 | Pcdha11    | -1.42 |
| 2885 | Serinc1    | -1.43 |
| 2886 | Zdhhc6     | -1.43 |
| 2887 | Ebf3       | -1.43 |
| 2888 | RGD1559442 | -1.43 |
| 2889 | Prkcdbp    | -1.43 |
| 2890 | Man2a2     | -1.43 |
| 2891 | Ube3a      | -1.43 |
| 2892 | Aldh1a1    | -1.43 |
| 2893 | Ctnnd1     | -1.43 |
| 2894 | Nckap1     | -1.43 |
| 2895 | Ola1       | -1.43 |
| 2896 | Arfp1      | -1.43 |
| 2897 | Rsrc1      | -1.43 |
| 2898 | Smc2       | -1.43 |
| 2899 | Dffa       | -1.43 |
| 2900 | Col1a2     | -1.43 |
| 2901 | Col1a2     | -1.43 |
| 2902 | Acss3      | -1.43 |

|      |            |       |
|------|------------|-------|
| 2903 | Dnajc14    | -1.43 |
| 2904 | H1f0       | -1.43 |
| 2905 | Syngr1     | -1.43 |
| 2906 | Ift172     | -1.43 |
| 2907 | Atp5s      | -1.43 |
| 2908 | Bok        | -1.43 |
| 2909 | Timm8b     | -1.43 |
| 2910 | Dpp8       | -1.43 |
| 2911 | Mmgt1      | -1.43 |
| 2912 | Faim2      | -1.43 |
| 2913 | Rgn        | -1.43 |
| 2914 | Ocl        | -1.43 |
| 2915 | Snai2      | -1.43 |
| 2916 | Dscr3      | -1.43 |
| 2917 | Exoc7      | -1.43 |
| 2918 | Exoc7      | -1.43 |
| 2919 | Tmem101    | -1.43 |
| 2920 | Snap47     | -1.43 |
| 2921 | Fam173a    | -1.43 |
| 2922 | Mrip       | -1.43 |
| 2923 | Tmem97     | -1.43 |
| 2924 | RGD1304982 | -1.43 |
| 2925 | Vps29      | -1.43 |
| 2926 | Comtd1     | -1.43 |
| 2927 | Tmem175    | -1.43 |
| 2928 | Scgn       | -1.43 |
| 2929 | Glud1      | -1.43 |
| 2930 | Ldhd       | -1.43 |
| 2931 | Nr3c2      | -1.43 |
| 2932 | Ctif       | -1.43 |
| 2933 | Apc        | -1.43 |
| 2934 | Pcdha1     | -1.43 |
| 2935 | Pcdha6     | -1.43 |
| 2936 | Pcdha9     | -1.43 |
| 2937 | Pcdha13    | -1.43 |
| 2938 | Ddt        | -1.44 |
| 2939 | Capn1      | -1.44 |
| 2940 | Vkorc1     | -1.44 |
| 2941 | Pvrl2      | -1.44 |
| 2942 | Atp5sl     | -1.44 |
| 2943 | Slc7a10    | -1.44 |

|      |         |       |
|------|---------|-------|
| 2944 | Kctd13  | -1.44 |
| 2945 | Dhcr7   | -1.44 |
| 2946 | Zhx3    | -1.44 |
| 2947 | Srp14   | -1.44 |
| 2948 | Cercam  | -1.44 |
| 2949 | Morn5   | -1.44 |
| 2950 | Fpgt    | -1.44 |
| 2951 | Snx7    | -1.44 |
| 2952 | Armc1   | -1.44 |
| 2953 | Ensa    | -1.44 |
| 2954 | Pigk    | -1.44 |
| 2955 | Park7   | -1.44 |
| 2956 | Park7   | -1.44 |
| 2957 | Park7   | -1.44 |
| 2958 | Pex14   | -1.44 |
| 2959 | Astn2   | -1.44 |
| 2960 | Npr2    | -1.44 |
| 2961 | Grcc10  | -1.44 |
| 2962 | Sumf1   | -1.44 |
| 2963 | Gmcl1   | -1.44 |
| 2964 | Ahcyl2  | -1.44 |
| 2965 | Hadha   | -1.44 |
| 2966 | Jkamp   | -1.44 |
| 2967 | Acyp1   | -1.44 |
| 2968 | Ifi27   | -1.44 |
| 2969 | Grcc10  | -1.44 |
| 2970 | Prdx4   | -1.44 |
| 2971 | Cldn5   | -1.44 |
| 2972 | Atp1b2  | -1.44 |
| 2973 | Rnf187  | -1.44 |
| 2974 | Mrpl55  | -1.44 |
| 2975 | Mripip  | -1.44 |
| 2976 | Rundc3a | -1.44 |
| 2977 | Rgl1    | -1.44 |
| 2978 | Pop7    | -1.44 |
| 2979 | Rilpl1  | -1.44 |
| 2980 | Ang     | -1.44 |
| 2981 | Dek     | -1.44 |
| 2982 | Dusp4   | -1.44 |
| 2983 | Pcdha3  | -1.44 |
| 2984 | Pcdha5  | -1.44 |

|      |              |       |
|------|--------------|-------|
| 2985 | RGD1312005   | -1.44 |
| 2986 | Dnajc12      | -1.45 |
| 2987 | Rbp4         | -1.45 |
| 2988 | RGD1359158   | -1.45 |
| 2989 | Ubr1         | -1.45 |
| 2990 | Fcn1         | -1.45 |
| 2991 | Polr3gl      | -1.45 |
| 2992 | Trim23       | -1.45 |
| 2993 | Cp           | -1.45 |
| 2994 | Park7        | -1.45 |
| 2995 | Park7        | -1.45 |
| 2996 | Ikbkap       | -1.45 |
| 2997 | Adhfe1       | -1.45 |
| 2998 | Ssbp3        | -1.45 |
| 2999 | Camk1        | -1.45 |
| 3000 | Sema3d       | -1.45 |
| 3001 | RGD1306151   | -1.45 |
| 3002 | Pip4k2c      | -1.45 |
| 3003 | Crim1        | -1.45 |
| 3004 | Ptpn         | -1.45 |
| 3005 | Nif3l1       | -1.45 |
| 3006 | Abi2         | -1.45 |
| 3007 | B3gnt7       | -1.45 |
| 3008 | Map2k5       | -1.45 |
| 3009 | Map2k5       | -1.45 |
| 3010 | Wdr61        | -1.45 |
| 3011 | Clmp         | -1.45 |
| 3012 | RGD1563941   | -1.45 |
| 3013 | Nptn         | -1.45 |
| 3014 | Prkar2a      | -1.45 |
| 3015 | Lsamp        | -1.45 |
| 3016 | Plcd3        | -1.45 |
| 3017 | Tmem37       | -1.45 |
| 3018 | LOC100125367 | -1.45 |
| 3019 | Mvk          | -1.45 |
| 3020 | Bri3         | -1.45 |
| 3021 | Gtf2i        | -1.45 |
| 3022 | Styx         | -1.45 |
| 3023 | Tdrd3        | -1.45 |
| 3024 | Sod3         | -1.45 |

|      |              |       |
|------|--------------|-------|
| 3025 | Exoc1        | -1.45 |
| 3026 | Exoc2        | -1.45 |
| 3027 | Nrsn1        | -1.45 |
| 3028 | Plxdc2       | -1.45 |
| 3029 | Tll1         | -1.45 |
| 3030 | Lphn1        | -1.45 |
| 3031 | Sil1         | -1.45 |
| 3032 | Rock1        | -1.45 |
| 3033 | Pcdha2       | -1.45 |
| 3034 | Pacsin1      | -1.46 |
| 3035 | Got1         | -1.46 |
| 3036 | Plgrkt       | -1.46 |
| 3037 | RGD1305592   | -1.46 |
| 3038 | Folr2        | -1.46 |
| 3039 | Fam50a       | -1.46 |
| 3040 | Sv2b         | -1.46 |
| 3041 | Lig1         | -1.46 |
| 3042 | Snta1        | -1.46 |
| 3043 | Tmx4         | -1.46 |
| 3044 | Zeb2         | -1.46 |
| 3045 | Vav2         | -1.46 |
| 3046 | St6galnac6   | -1.46 |
| 3047 | Msto1        | -1.46 |
| 3048 | Gucy1b3      | -1.46 |
| 3049 | Cp           | -1.46 |
| 3050 | mrpl24       | -1.46 |
| 3051 | Elt1         | -1.46 |
| 3052 | Fbxo6        | -1.46 |
| 3053 | Tmem70       | -1.46 |
| 3054 | LOC100294508 | -1.46 |
| 3055 | Cops7a       | -1.46 |
| 3056 | Tmem209      | -1.46 |
| 3057 | Krcc1        | -1.46 |
| 3058 | Ogg1         | -1.46 |
| 3059 | Ddx17        | -1.46 |
| 3060 | Zfp124       | -1.46 |
| 3061 | Khdrbs3      | -1.46 |
| 3062 | Sgsm3        | -1.46 |
| 3063 | Eapp         | -1.46 |
| 3064 | Slc4a3       | -1.46 |

|      |            |       |
|------|------------|-------|
| 3065 | Cib2       | -1.46 |
| 3066 | Zfp266     | -1.46 |
| 3067 | Atp5g1     | -1.46 |
| 3068 | Rogdi      | -1.46 |
| 3069 | Nxn        | -1.46 |
| 3070 | Rph3al     | -1.46 |
| 3071 | Col1a1     | -1.46 |
| 3072 | Ppp1r9b    | -1.46 |
| 3073 | Scrn2      | -1.46 |
| 3074 | Lrrc45     | -1.46 |
| 3075 | Rabgap1l   | -1.46 |
| 3076 | Cnih4      | -1.46 |
| 3077 | Fscn1      | -1.46 |
| 3078 | Anapc5     | -1.46 |
| 3079 | Acads      | -1.46 |
| 3080 | Anxa7      | -1.46 |
| 3081 | Pck2       | -1.46 |
| 3082 | Sec14l2    | -1.46 |
| 3083 | Ablim2     | -1.46 |
| 3084 | Man2b2     | -1.46 |
| 3085 | Fzd8       | -1.46 |
| 3086 | Fzd8       | -1.46 |
| 3087 | RGD1311847 | -1.46 |
| 3088 | Ldb3       | -1.46 |
| 3089 | Pcdhac1    | -1.46 |
| 3090 | Cuta       | -1.47 |
| 3091 | Cuta       | -1.47 |
| 3092 | Arl2       | -1.47 |
| 3093 | Rgd1310049 | -1.47 |
| 3094 | Vnn1       | -1.47 |
| 3095 | Acy3       | -1.47 |
| 3096 | Hif1an     | -1.47 |
| 3097 | Trub2      | -1.47 |
| 3098 | Mrrf       | -1.47 |
| 3099 | Bbs5       | -1.47 |
| 3100 | Sv2a       | -1.47 |
| 3101 | Mpdz       | -1.47 |
| 3102 | Tmem261    | -1.47 |
| 3103 | Slc1a7     | -1.47 |
| 3104 | Sdc3       | -1.47 |
| 3105 | lcmt       | -1.47 |

|      |            |       |
|------|------------|-------|
| 3106 | Chchd6     | -1.47 |
| 3107 | Herc3      | -1.47 |
| 3108 | Fam50a     | -1.47 |
| 3109 | Nudcd1     | -1.47 |
| 3110 | Ttc8       | -1.47 |
| 3111 | Tyms       | -1.47 |
| 3112 | Dis3l      | -1.47 |
| 3113 | Gpc3       | -1.47 |
| 3114 | Ece2       | -1.47 |
| 3115 | Mrps23     | -1.47 |
| 3116 | RGD1310429 | -1.47 |
| 3117 | Sparc      | -1.47 |
| 3118 | Camkk1     | -1.47 |
| 3119 | Mrpl10     | -1.47 |
| 3120 | Syt2       | -1.47 |
| 3121 | Anapc4     | -1.47 |
| 3122 | Mapk10     | -1.47 |
| 3123 | Rpp40      | -1.47 |
| 3124 | Slmap      | -1.47 |
| 3125 | Asah1      | -1.47 |
| 3126 | Acta1      | -1.47 |
| 3127 | Bbs2       | -1.47 |
| 3128 | MGC105567  | -1.47 |
| 3129 | Homer2     | -1.48 |
| 3130 | Fxyd1      | -1.48 |
| 3131 | Stx7       | -1.48 |
| 3132 | Yif1a      | -1.48 |
| 3133 | Vldlr      | -1.48 |
| 3134 | Acvr2a     | -1.48 |
| 3135 | Nphp1      | -1.48 |
| 3136 | Gdap1l1    | -1.48 |
| 3137 | Acadm      | -1.48 |
| 3138 | Etfdh      | -1.48 |
| 3139 | Anxa5      | -1.48 |
| 3140 | Rad1       | -1.48 |
| 3141 | Selt       | -1.48 |
| 3142 | Ctbs       | -1.48 |
| 3143 | Ldhb       | -1.48 |
| 3144 | Cdk14      | -1.48 |
| 3145 | Sox10      | -1.48 |
| 3146 | Pdpx       | -1.48 |

|      |            |       |
|------|------------|-------|
| 3147 | Cfl2       | -1.48 |
| 3148 | Dpy30      | -1.48 |
| 3149 | Gstz1      | -1.48 |
| 3150 | MGC94335   | -1.48 |
| 3151 | Klhdc8b    | -1.48 |
| 3152 | Acat1      | -1.48 |
| 3153 | Ddx25      | -1.48 |
| 3154 | Map7d3     | -1.48 |
| 3155 | Nap1l2     | -1.48 |
| 3156 | Phka1      | -1.48 |
| 3157 | Igbp1      | -1.48 |
| 3158 | Ezh1       | -1.48 |
| 3159 | Mtmr4      | -1.48 |
| 3160 | Irf3       | -1.48 |
| 3161 | Rbfox1     | -1.48 |
| 3162 | Cdkn2aipnl | -1.48 |
| 3163 | Cltc       | -1.48 |
| 3164 | Dstyk      | -1.48 |
| 3165 | Rabif      | -1.48 |
| 3166 | Sumf2      | -1.48 |
| 3167 | Dnajc9     | -1.48 |
| 3168 | Commd1     | -1.48 |
| 3169 | Maea       | -1.48 |
| 3170 | Ablim2     | -1.48 |
| 3171 | Mapk10     | -1.48 |
| 3172 | Stard3nl   | -1.48 |
| 3173 | Sfxn1      | -1.48 |
| 3174 | Bmi1       | -1.48 |
| 3175 | Jph3       | -1.48 |
| 3176 | Epb41l4a   | -1.48 |
| 3177 | Abhd3      | -1.48 |
| 3178 | Pcdha4     | -1.48 |
| 3179 | Pcdha12    | -1.48 |
| 3180 | Ppa1       | -1.49 |
| 3181 | Akap7      | -1.49 |
| 3182 | RGD1305235 | -1.49 |
| 3183 | Tubgcp5    | -1.49 |
| 3184 | Lcmt1      | -1.49 |
| 3185 | Pdcd4      | -1.49 |
| 3186 | Fitm2      | -1.49 |
| 3187 | Snhg11     | -1.49 |



|      |         |       |
|------|---------|-------|
| 3188 | Commd9  | -1.49 |
| 3189 | Cd59    | -1.49 |
| 3190 | Polr3k  | -1.49 |
| 3191 | Sigmar1 | -1.49 |
| 3192 | Slc35a1 | -1.49 |
| 3193 | Nbn     | -1.49 |
| 3194 | Echdc2  | -1.49 |
| 3195 | Faf1    | -1.49 |
| 3196 | Gmcl1   | -1.49 |
| 3197 | Snrnp27 | -1.49 |
| 3198 | Srpk2   | -1.49 |
| 3199 | Thumpd3 | -1.49 |
| 3200 | Thumpd3 | -1.49 |
| 3201 | Mar-08  | -1.49 |
| 3202 | Tspan9  | -1.49 |
| 3203 | Fbxo32  | -1.49 |
| 3204 | Fbln5   | -1.49 |
| 3205 | Fkbp3   | -1.49 |
| 3206 | Dld     | -1.49 |
| 3207 | Acyp1   | -1.49 |
| 3208 | Myeov2  | -1.49 |
| 3209 | Yipf6   | -1.49 |
| 3210 | Psmg1   | -1.49 |
| 3211 | Gbe1    | -1.49 |
| 3212 | Cdc27   | -1.49 |
| 3213 | Rab34   | -1.49 |
| 3214 | Lym7    | -1.49 |
| 3215 | Ltc4s   | -1.49 |
| 3216 | Arhgdig | -1.49 |
| 3217 | Dnaja3  | -1.49 |
| 3218 | Bpnt1   | -1.49 |
| 3219 | Gbas    | -1.49 |
| 3220 | Tmed4   | -1.49 |
| 3221 | Bicd2   | -1.49 |
| 3222 | Dapk1   | -1.49 |
| 3223 | Tpgs2   | -1.49 |
| 3224 | Pcdha7  | -1.49 |
| 3225 | Cuta    | -1.5  |
| 3226 | Dip2a   | -1.5  |
| 3227 | Erlin1  | -1.5  |
| 3228 | Tmem216 | -1.5  |

|      |            |       |
|------|------------|-------|
| 3229 | Mesdc2     | -1.5  |
| 3230 | Tmem126a   | -1.5  |
| 3231 | Prcp       | -1.5  |
| 3232 | Apoa1bp    | -1.5  |
| 3233 | Dhfr       | -1.5  |
| 3234 | S100a13    | -1.5  |
| 3235 | Them4      | -1.5  |
| 3236 | Agtrap     | -1.5  |
| 3237 | Nipsnap3b  | -1.5  |
| 3238 | Usp5       | -1.5  |
| 3239 | Crbn       | -1.5  |
| 3240 | Cldn12     | -1.5  |
| 3241 | Clec2l     | -1.5  |
| 3242 | Thumpd3    | -1.5  |
| 3243 | RGD1561328 | -1.5  |
| 3244 | Slc35e3    | -1.5  |
| 3245 | Ywhaq      | -1.5  |
| 3246 | Galnt16    | -1.5  |
| 3247 | Dtymk      | -1.5  |
| 3248 | Fam134a    | -1.5  |
| 3249 | Man2a1     | -1.5  |
| 3250 | Tcta       | -1.5  |
| 3251 | Pik3r4     | -1.5  |
| 3252 | Wdr13      | -1.5  |
| 3253 | Eif4a2     | -1.5  |
| 3254 | Cldn1      | -1.5  |
| 3255 | Mmp28      | -1.5  |
| 3256 | Mmp28      | -1.5  |
| 3257 | Sgsm2      | -1.5  |
| 3258 | Dhrs7b     | -1.5  |
| 3259 | Aldh9a1    | -1.5  |
| 3260 | Plbd2      | -1.5  |
| 3261 | Adrbk2     | -1.5  |
| 3262 | Cnih1      | -1.5  |
| 3263 | C1qtnf7    | -1.5  |
| 3264 | Abcg3      | -1.5  |
| 3265 | Hfe        | -1.5  |
| 3266 | Ldb3       | -1.5  |
| 3267 | Wwc2       | -1.5  |
| 3268 | Wdr73      | -1.51 |
| 3269 | Isoc2b     | -1.51 |

|      |              |       |
|------|--------------|-------|
| 3270 | Pgm211       | -1.51 |
| 3271 | Ddb1         | -1.51 |
| 3272 | Uqcc1        | -1.51 |
| 3273 | Caprin1      | -1.51 |
| 3274 | Fap          | -1.51 |
| 3275 | Slc2a8       | -1.51 |
| 3276 | Fam102b      | -1.51 |
| 3277 | Kirrel       | -1.51 |
| 3278 | Pcdh18       | -1.51 |
| 3279 | Sec62        | -1.51 |
| 3280 | Plk2         | -1.51 |
| 3281 | Ensa         | -1.51 |
| 3282 | Zmpste24     | -1.51 |
| 3283 | Cdc26        | -1.51 |
| 3284 | Tmem53       | -1.51 |
| 3285 | Kcnh2        | -1.51 |
| 3286 | LOC100910996 | -1.51 |
| 3287 | Ngb          | -1.51 |
| 3288 | Dpy30        | -1.51 |
| 3289 | Pnkd         | -1.51 |
| 3290 | Yes1         | -1.51 |
| 3291 | Dcps         | -1.51 |
| 3292 | Rcn2         | -1.51 |
| 3293 | Ccdc71       | -1.51 |
| 3294 | Ndufb10      | -1.51 |
| 3295 | Tnfaip1      | -1.51 |
| 3296 | Aoc2-ps1     | -1.51 |
| 3297 | Brinp2       | -1.51 |
| 3298 | Rnpep        | -1.51 |
| 3299 | Astn1        | -1.51 |
| 3300 | Lias         | -1.51 |
| 3301 | Tbc1d7       | -1.51 |
| 3302 | Ldb3         | -1.51 |
| 3303 | Tsnax        | -1.51 |
| 3304 | Pex19        | -1.51 |
| 3305 | Tcf4         | -1.51 |
| 3306 | Tmlhe        | -1.52 |
| 3307 | Usmg5        | -1.52 |
| 3308 | Pih1d1       | -1.52 |
| 3309 | Glrx3        | -1.52 |

|      |            |       |
|------|------------|-------|
| 3310 | Tcf7l2     | -1.52 |
| 3311 | Bmp7       | -1.52 |
| 3312 | RGD1564379 | -1.52 |
| 3313 | Nelfb      | -1.52 |
| 3314 | Anp32a     | -1.52 |
| 3315 | Lamtor2    | -1.52 |
| 3316 | Fam189b    | -1.52 |
| 3317 | Cdc26      | -1.52 |
| 3318 | Ndufb2     | -1.52 |
| 3319 | Atf7       | -1.52 |
| 3320 | Cgref1     | -1.52 |
| 3321 | Dlat       | -1.52 |
| 3322 | Sep-07     | -1.52 |
| 3323 | Sep-07     | -1.52 |
| 3324 | Slc16a2    | -1.52 |
| 3325 | St6galnac2 | -1.52 |
| 3326 | Scarf1     | -1.52 |
| 3327 | Gnptg      | -1.52 |
| 3328 | Dhx40      | -1.52 |
| 3329 | Trove2     | -1.52 |
| 3330 | Tsn        | -1.52 |
| 3331 | Pex19      | -1.52 |
| 3332 | Fry        | -1.52 |
| 3333 | Sucla2     | -1.52 |
| 3334 | Sugt1      | -1.52 |
| 3335 | Lmo7       | -1.52 |
| 3336 | Ldb3       | -1.52 |
| 3337 | Gcdh       | -1.52 |
| 3338 | Fhod3      | -1.52 |
| 3339 | Hsd17b4    | -1.52 |
| 3340 | Pank1      | -1.53 |
| 3341 | Mir675     | -1.53 |
| 3342 | RGD1310127 | -1.53 |
| 3343 | Bckdha     | -1.53 |
| 3344 | Clpb       | -1.53 |
| 3345 | Sez6l2     | -1.53 |
| 3346 | Grb14      | -1.53 |
| 3347 | Chp1       | -1.53 |
| 3348 | Rnpc3      | -1.53 |
| 3349 | Rabif      | -1.53 |
| 3350 | Tram1l1    | -1.53 |

|      |           |       |
|------|-----------|-------|
| 3351 | Prkcz     | -1.53 |
| 3352 | Dock7     | -1.53 |
| 3353 | Alad      | -1.53 |
| 3354 | Cdc26     | -1.53 |
| 3355 | Ankrd6    | -1.53 |
| 3356 | Coq3      | -1.53 |
| 3357 | Pex1      | -1.53 |
| 3358 | LOC502894 | -1.53 |
| 3359 | Cs        | -1.53 |
| 3360 | Apol3     | -1.53 |
| 3361 | Apol3     | -1.53 |
| 3362 | Fkbp1b    | -1.53 |
| 3363 | Yipf4     | -1.53 |
| 3364 | Zc3h14    | -1.53 |
| 3365 | Zc3h14    | -1.53 |
| 3366 | Farsb     | -1.53 |
| 3367 | Col5a2    | -1.53 |
| 3368 | Idh3a     | -1.53 |
| 3369 | Gpd1      | -1.53 |
| 3370 | Klhl24    | -1.53 |
| 3371 | Timmdc1   | -1.53 |
| 3372 | Tango2    | -1.53 |
| 3373 | Azi1      | -1.53 |
| 3374 | Decr2     | -1.53 |
| 3375 | Dpt       | -1.53 |
| 3376 | Pex19     | -1.53 |
| 3377 | Snrnp35   | -1.53 |
| 3378 | Dnajc15   | -1.53 |
| 3379 | Rhobtb2   | -1.53 |
| 3380 | Tm9sf1    | -1.53 |
| 3381 | Camk2b    | -1.53 |
| 3382 | Camk2b    | -1.53 |
| 3383 | Itga8     | -1.53 |
| 3384 | Tspan17   | -1.53 |
| 3385 | Mvb12a    | -1.53 |
| 3386 | Slc26a2   | -1.53 |
| 3387 | Mtch1     | -1.54 |
| 3388 | Pde9a     | -1.54 |
| 3389 | Prmt2     | -1.54 |
| 3390 | Aifm2     | -1.54 |
| 3391 | Pln       | -1.54 |

|      |            |       |
|------|------------|-------|
| 3392 | Smoc2      | -1.54 |
| 3393 | Dyrk1b     | -1.54 |
| 3394 | Rab30      | -1.54 |
| 3395 | Coa4       | -1.54 |
| 3396 | Cdipt      | -1.54 |
| 3397 | Dock1      | -1.54 |
| 3398 | Bad        | -1.54 |
| 3399 | Mkks       | -1.54 |
| 3400 | Csnk2a1    | -1.54 |
| 3401 | Mccc1      | -1.54 |
| 3402 | Adamts12   | -1.54 |
| 3403 | RGD1305938 | -1.54 |
| 3404 | Mccc2      | -1.54 |
| 3405 | Rab33b     | -1.54 |
| 3406 | Usp33      | -1.54 |
| 3407 | Plod1      | -1.54 |
| 3408 | Lancl2     | -1.54 |
| 3409 | Tmem176a   | -1.54 |
| 3410 | Kcnmb4     | -1.54 |
| 3411 | Pfdn5      | -1.54 |
| 3412 | Slc8a1     | -1.54 |
| 3413 | Acyp1      | -1.54 |
| 3414 | Ltbp2      | -1.54 |
| 3415 | Spata7     | -1.54 |
| 3416 | Ckb        | -1.54 |
| 3417 | Ppp2r3a    | -1.54 |
| 3418 | Tpm1       | -1.54 |
| 3419 | Slc25a1    | -1.54 |
| 3420 | Cuedc1     | -1.54 |
| 3421 | Myo1c      | -1.54 |
| 3422 | Naa60      | -1.54 |
| 3423 | Coasy      | -1.54 |
| 3424 | Fn3k       | -1.54 |
| 3425 | Klhl20     | -1.54 |
| 3426 | Fam163a    | -1.54 |
| 3427 | Pm20d1     | -1.54 |
| 3428 | Ppp3cc     | -1.54 |
| 3429 | Chmp7      | -1.54 |
| 3430 | Paics      | -1.54 |
| 3431 | Slc4a4     | -1.54 |
| 3432 | Bicd2      | -1.54 |

|      |            |       |
|------|------------|-------|
| 3433 | Coq9       | -1.54 |
| 3434 | Pcdhga9    | -1.54 |
| 3435 | Pcdhga10   | -1.54 |
| 3436 | Pcdhga12   | -1.54 |
| 3437 | Scd1       | -1.55 |
| 3438 | Aamdc      | -1.55 |
| 3439 | Myh14      | -1.55 |
| 3440 | Lage3      | -1.55 |
| 3441 | Ccdc90b    | -1.55 |
| 3442 | MacroD1    | -1.55 |
| 3443 | Trim44     | -1.55 |
| 3444 | Pde4dip    | -1.55 |
| 3445 | Dclk1      | -1.55 |
| 3446 | Macf1      | -1.55 |
| 3447 | Decr1      | -1.55 |
| 3448 | Il11ra1    | -1.55 |
| 3449 | Fbxo2      | -1.55 |
| 3450 | Dysf       | -1.55 |
| 3451 | Slc8a1     | -1.55 |
| 3452 | Slc8a1     | -1.55 |
| 3453 | Slc8a1     | -1.55 |
| 3454 | Slc8a1     | -1.55 |
| 3455 | Slc8a1     | -1.55 |
| 3456 | Slc8a1     | -1.55 |
| 3457 | Slc8a1     | -1.55 |
| 3458 | Lman2l     | -1.55 |
| 3459 | Tpm1       | -1.55 |
| 3460 | Adam10     | -1.55 |
| 3461 | Amotl2     | -1.55 |
| 3462 | Tbl1x      | -1.55 |
| 3463 | Golgb1     | -1.55 |
| 3464 | Emp2       | -1.55 |
| 3465 | Rabep1     | -1.55 |
| 3466 | Slc25a10   | -1.55 |
| 3467 | Sft2d2     | -1.55 |
| 3468 | Stx1a      | -1.55 |
| 3469 | Camk2b     | -1.55 |
| 3470 | Lap3       | -1.55 |
| 3471 | Tgfbr3     | -1.55 |
| 3472 | Hsd17b11   | -1.55 |
| 3473 | RGD1307325 | -1.55 |

|      |            |       |
|------|------------|-------|
| 3474 | Gnpda1     | -1.55 |
| 3475 | Pcdhac2    | -1.55 |
| 3476 | Pcdhga8    | -1.55 |
| 3477 | Gcc2       | -1.56 |
| 3478 | Plcb3      | -1.56 |
| 3479 | Mrpl36     | -1.56 |
| 3480 | Mrpl36     | -1.56 |
| 3481 | Pak1       | -1.56 |
| 3482 | Lhpp       | -1.56 |
| 3483 | Pnpla2     | -1.56 |
| 3484 | Pnpla2     | -1.56 |
| 3485 | RGD1560108 | -1.56 |
| 3486 | Ttc30a1    | -1.56 |
| 3487 | Abca2      | -1.56 |
| 3488 | Prrx2      | -1.56 |
| 3489 | Ube2l6     | -1.56 |
| 3490 | Jade1      | -1.56 |
| 3491 | Lhfp       | -1.56 |
| 3492 | Tdrkh      | -1.56 |
| 3493 | Coro2a     | -1.56 |
| 3494 | Fam110b    | -1.56 |
| 3495 | Rspo1      | -1.56 |
| 3496 | Lsm10      | -1.56 |
| 3497 | Tamm41     | -1.56 |
| 3498 | Vamp5      | -1.56 |
| 3499 | Impdh1     | -1.56 |
| 3500 | Ptk2       | -1.56 |
| 3501 | Chrac1     | -1.56 |
| 3502 | Mfsd3      | -1.56 |
| 3503 | Zc3h7b     | -1.56 |
| 3504 | Letmd1     | -1.56 |
| 3505 | Atraid     | -1.56 |
| 3506 | Slc8a1     | -1.56 |
| 3507 | RGD1311756 | -1.56 |
| 3508 | Zfp386     | -1.56 |
| 3509 | Bend6      | -1.56 |
| 3510 | Gmppa      | -1.56 |
| 3511 | Tpm1       | -1.56 |
| 3512 | Dixdc1     | -1.56 |
| 3513 | Jam3       | -1.56 |
| 3514 | Efnb1      | -1.56 |



|      |         |       |
|------|---------|-------|
| 3515 | App     | -1.56 |
| 3516 | Ndufb4  | -1.56 |
| 3517 | Prkca   | -1.56 |
| 3518 | Ctns    | -1.56 |
| 3519 | Rad50   | -1.56 |
| 3520 | Ptpn4   | -1.56 |
| 3521 | Sun1    | -1.56 |
| 3522 | Mlec    | -1.56 |
| 3523 | Emc9    | -1.56 |
| 3524 | Nacad   | -1.56 |
| 3525 | Btd     | -1.56 |
| 3526 | Haus1   | -1.56 |
| 3527 | Haus1   | -1.56 |
| 3528 | Lims2   | -1.56 |
| 3529 | Pcdhga1 | -1.56 |
| 3530 | Pcdhga7 | -1.56 |
| 3531 | Pcdhga5 | -1.56 |
| 3532 | Pcdhgb8 | -1.56 |
| 3533 | Idh2    | -1.57 |
| 3534 | Slco3a1 | -1.57 |
| 3535 | Mllt4   | -1.57 |
| 3536 | Pex7    | -1.57 |
| 3537 | Pcsk6   | -1.57 |
| 3538 | Lrrc57  | -1.57 |
| 3539 | Nacc2   | -1.57 |
| 3540 | Dync1i2 | -1.57 |
| 3541 | Dync1i2 | -1.57 |
| 3542 | Dync1i2 | -1.57 |
| 3543 | Itch    | -1.57 |
| 3544 | Nexn    | -1.57 |
| 3545 | Hadh    | -1.57 |
| 3546 | Amacr   | -1.57 |
| 3547 | Erp44   | -1.57 |
| 3548 | C2cd5   | -1.57 |
| 3549 | Fkbp4   | -1.57 |
| 3550 | Fam126a | -1.57 |
| 3551 | Lep     | -1.57 |
| 3552 | Rtkn    | -1.57 |
| 3553 | Fam21c  | -1.57 |
| 3554 | Tob2    | -1.57 |
| 3555 | Mrpl13  | -1.57 |

|      |          |       |
|------|----------|-------|
| 3556 | Nxph4    | -1.57 |
| 3557 | Gamt     | -1.57 |
| 3558 | Dgcr2    | -1.57 |
| 3559 | Rdh11    | -1.57 |
| 3560 | Rab15    | -1.57 |
| 3561 | Frmd6    | -1.57 |
| 3562 | Casp12   | -1.57 |
| 3563 | Tcf12    | -1.57 |
| 3564 | Iqsec2   | -1.57 |
| 3565 | Ebp      | -1.57 |
| 3566 | Fgd1     | -1.57 |
| 3567 | Senp7    | -1.57 |
| 3568 | Pdia5    | -1.57 |
| 3569 | Acly     | -1.57 |
| 3570 | Nlgn2    | -1.57 |
| 3571 | Dnaja3   | -1.57 |
| 3572 | Stx8     | -1.57 |
| 3573 | Pigc     | -1.57 |
| 3574 | Ywhag    | -1.57 |
| 3575 | Phkg1    | -1.57 |
| 3576 | Wdpcp    | -1.57 |
| 3577 | Tmem17   | -1.57 |
| 3578 | Aga      | -1.57 |
| 3579 | Trappc11 | -1.57 |
| 3580 | Ntpcr    | -1.57 |
| 3581 | Ctnna1   | -1.57 |
| 3582 | Pcdhga2  | -1.57 |
| 3583 | Pcdhga3  | -1.57 |
| 3584 | Pcdhga11 | -1.57 |
| 3585 | Eif4ebp2 | -1.58 |
| 3586 | Scube3   | -1.58 |
| 3587 | Cox8b    | -1.58 |
| 3588 | Aig1     | -1.58 |
| 3589 | Tmem86a  | -1.58 |
| 3590 | Gnaq     | -1.58 |
| 3591 | Pbx3     | -1.58 |
| 3592 | Entpd2   | -1.58 |
| 3593 | Chst14   | -1.58 |
| 3594 | Nexn     | -1.58 |
| 3595 | Cept1    | -1.58 |
| 3596 | Fbxo4    | -1.58 |

|      |              |       |
|------|--------------|-------|
| 3597 | Smim8        | -1.58 |
| 3598 | Galt         | -1.58 |
| 3599 | Vgll4        | -1.58 |
| 3600 | Armc10       | -1.58 |
| 3601 | Mkrn2        | -1.58 |
| 3602 | Lmf2         | -1.58 |
| 3603 | Suox         | -1.58 |
| 3604 | Ndufa4l2     | -1.58 |
| 3605 | Pqlc3        | -1.58 |
| 3606 | Fam49a       | -1.58 |
| 3607 | Cd276        | -1.58 |
| 3608 | Aagab        | -1.58 |
| 3609 | Plp1         | -1.58 |
| 3610 | Lztr1        | -1.58 |
| 3611 | Timp2        | -1.58 |
| 3612 | Acly         | -1.58 |
| 3613 | LOC100910318 | -1.58 |
| 3614 | LOC100910318 | -1.58 |
| 3615 | Vdac1        | -1.58 |
| 3616 | Ypel2        | -1.58 |
| 3617 | Amz2         | -1.58 |
| 3618 | Camsap2      | -1.58 |
| 3619 | Irs3         | -1.58 |
| 3620 | Thrb         | -1.58 |
| 3621 | Plau         | -1.58 |
| 3622 | Ntrk2        | -1.58 |
| 3623 | Ash2l        | -1.58 |
| 3624 | Mir143       | -1.58 |
| 3625 | Napg         | -1.58 |
| 3626 | Syt17        | -1.59 |
| 3627 | Zfp61        | -1.59 |
| 3628 | Lrp11        | -1.59 |
| 3629 | Pde8a        | -1.59 |
| 3630 | Cpt1a        | -1.59 |
| 3631 | Ltbp3        | -1.59 |
| 3632 | Sardh        | -1.59 |
| 3633 | Hoxd9        | -1.59 |
| 3634 | Acp2         | -1.59 |
| 3635 | Fbxo3        | -1.59 |

|      |              |       |
|------|--------------|-------|
| 3636 | Ifi44        | -1.59 |
| 3637 | Mrps36       | -1.59 |
| 3638 | Fam212b      | -1.59 |
| 3639 | S100pbp      | -1.59 |
| 3640 | Ncdn         | -1.59 |
| 3641 | Ndufaf6      | -1.59 |
| 3642 | Clstn1       | -1.59 |
| 3643 | Spr          | -1.59 |
| 3644 | Gnai1        | -1.59 |
| 3645 | Dnal4        | -1.59 |
| 3646 | Stxbp6       | -1.59 |
| 3647 | Cys1         | -1.59 |
| 3648 | Atp2c1       | -1.59 |
| 3649 | Tpm1         | -1.59 |
| 3650 | Prrg1        | -1.59 |
| 3651 | Hspa13       | -1.59 |
| 3652 | Rtp4         | -1.59 |
| 3653 | Anxa6        | -1.59 |
| 3654 | LOC100910318 | -1.59 |
| 3655 | LOC100910318 | -1.59 |
| 3656 | Nme3         | -1.59 |
| 3657 | Insig2       | -1.59 |
| 3658 | Slc7a7       | -1.59 |
| 3659 | Thrb         | -1.59 |
| 3660 | Sh3bp5       | -1.59 |
| 3661 | Slc25a4      | -1.59 |
| 3662 | Dok4         | -1.59 |
| 3663 | Pyroxd2      | -1.6  |
| 3664 | Brsk1        | -1.6  |
| 3665 | Stard5       | -1.6  |
| 3666 | Nsdhl        | -1.6  |
| 3667 | Pxmp4        | -1.6  |
| 3668 | Snx16        | -1.6  |
| 3669 | Spg20        | -1.6  |
| 3670 | Anxa4        | -1.6  |
| 3671 | Orc5         | -1.6  |
| 3672 | Rab5b        | -1.6  |
| 3673 | Kctd17       | -1.6  |
| 3674 | Atxn10       | -1.6  |

|      |            |       |
|------|------------|-------|
| 3675 | Tgfb3      | -1.6  |
| 3676 | Dync2li1   | -1.6  |
| 3677 | Fam135a    | -1.6  |
| 3678 | Bmpr2      | -1.6  |
| 3679 | Tmed3      | -1.6  |
| 3680 | Tpm1       | -1.6  |
| 3681 | Nap1l3     | -1.6  |
| 3682 | Mageh1     | -1.6  |
| 3683 | Apoo       | -1.6  |
| 3684 | Sh3bgrl    | -1.6  |
| 3685 | Tceal1     | -1.6  |
| 3686 | Pigz       | -1.6  |
| 3687 | Pigz       | -1.6  |
| 3688 | Eral1      | -1.6  |
| 3689 | Canx       | -1.6  |
| 3690 | Metrn      | -1.6  |
| 3691 | RGD1565784 | -1.6  |
| 3692 | Map2k6     | -1.6  |
| 3693 | Akap11     | -1.6  |
| 3694 | Ttc5       | -1.6  |
| 3695 | Mrps24     | -1.6  |
| 3696 | Bmp6       | -1.6  |
| 3697 | Nfatc3     | -1.6  |
| 3698 | Pcdhgb7    | -1.6  |
| 3699 | Cidea      | -1.6  |
| 3700 | Nmrk1      | -1.61 |
| 3701 | Rtn3       | -1.61 |
| 3702 | Ccdc127    | -1.61 |
| 3703 | Ankrd27    | -1.61 |
| 3704 | Tacc2      | -1.61 |
| 3705 | Tmem80     | -1.61 |
| 3706 | Snapin     | -1.61 |
| 3707 | Trim2      | -1.61 |
| 3708 | Arsb       | -1.61 |
| 3709 | Mrpl15     | -1.61 |
| 3710 | Efcab7     | -1.61 |
| 3711 | Heyl       | -1.61 |
| 3712 | Rragc      | -1.61 |
| 3713 | Cacna2d1   | -1.61 |
| 3714 | Mgst1      | -1.61 |
| 3715 | Rarg       | -1.61 |

|      |          |       |
|------|----------|-------|
| 3716 | Tll1     | -1.61 |
| 3717 | Mgat3    | -1.61 |
| 3718 | Dnajc27  | -1.61 |
| 3719 | Cpsf3    | -1.61 |
| 3720 | Enpp4    | -1.61 |
| 3721 | Ryk      | -1.61 |
| 3722 | Hsd17b10 | -1.61 |
| 3723 | Slit3    | -1.61 |
| 3724 | Tmem9    | -1.61 |
| 3725 | Gpr146   | -1.61 |
| 3726 | Lats2    | -1.61 |
| 3727 | Tns3     | -1.61 |
| 3728 | Kdr      | -1.61 |
| 3729 | Nudt5    | -1.61 |
| 3730 | Kif13a   | -1.61 |
| 3731 | Arl10    | -1.61 |
| 3732 | Bst2     | -1.61 |
| 3733 | Plac9    | -1.61 |
| 3734 | Msmo1    | -1.61 |
| 3735 | Clcn3    | -1.61 |
| 3736 | Reep5    | -1.61 |
| 3737 | Commd10  | -1.61 |
| 3738 | Rtn3     | -1.62 |
| 3739 | Nrip3    | -1.62 |
| 3740 | Mrpl48   | -1.62 |
| 3741 | Atf5     | -1.62 |
| 3742 | Pld3     | -1.62 |
| 3743 | Zfp524   | -1.62 |
| 3744 | B3gnt8   | -1.62 |
| 3745 | Uqcrc2   | -1.62 |
| 3746 | Dpcd     | -1.62 |
| 3747 | Tsc22d3  | -1.62 |
| 3748 | Mtx2     | -1.62 |
| 3749 | Kbtbd4   | -1.62 |
| 3750 | Vwa5a    | -1.62 |
| 3751 | Smim8    | -1.62 |
| 3752 | Manea    | -1.62 |
| 3753 | Yipf1    | -1.62 |
| 3754 | Ppt1     | -1.62 |
| 3755 | Hpcal4   | -1.62 |
| 3756 | Cacna2d1 | -1.62 |

|      |          |       |
|------|----------|-------|
| 3757 | Smo      | -1.62 |
| 3758 | Exoc4    | -1.62 |
| 3759 | Atxn7l3b | -1.62 |
| 3760 | Adamts10 | -1.62 |
| 3761 | Kif3c    | -1.62 |
| 3762 | Aox1     | -1.62 |
| 3763 | Ei24     | -1.62 |
| 3764 | Tmem205  | -1.62 |
| 3765 | Vwa5a    | -1.62 |
| 3766 | Zc4h2    | -1.62 |
| 3767 | Tsen15   | -1.62 |
| 3768 | Cdh19    | -1.62 |
| 3769 | Tmem9    | -1.62 |
| 3770 | Edem3    | -1.62 |
| 3771 | Chac2    | -1.62 |
| 3772 | Clock    | -1.62 |
| 3773 | Afap1l1  | -1.62 |
| 3774 | Ndst1    | -1.62 |
| 3775 | Cdc23    | -1.62 |
| 3776 | Fig4     | -1.63 |
| 3777 | Zwint    | -1.63 |
| 3778 | Ascc1    | -1.63 |
| 3779 | Prdx3    | -1.63 |
| 3780 | Apoe     | -1.63 |
| 3781 | Apoe     | -1.63 |
| 3782 | Apoe     | -1.63 |
| 3783 | Apoe     | -1.63 |
| 3784 | Igf2r    | -1.63 |
| 3785 | Tulp4    | -1.63 |
| 3786 | Pnmal2   | -1.63 |
| 3787 | Gnb4     | -1.63 |
| 3788 | Ptcd2    | -1.63 |
| 3789 | Lrrc40   | -1.63 |
| 3790 | Lrrc42   | -1.63 |
| 3791 | Smim8    | -1.63 |
| 3792 | Sgce     | -1.63 |
| 3793 | Cacna2d1 | -1.63 |
| 3794 | Dctn1    | -1.63 |
| 3795 | Gna11    | -1.63 |
| 3796 | Xrcc6    | -1.63 |
| 3797 | Tc2n     | -1.63 |

|      |            |       |
|------|------------|-------|
| 3798 | Akap6      | -1.63 |
| 3799 | Cdc42bpb   | -1.63 |
| 3800 | Cyp39a1    | -1.63 |
| 3801 | Inpp1      | -1.63 |
| 3802 | Drd2       | -1.63 |
| 3803 | Ick        | -1.63 |
| 3804 | Iqsec2     | -1.63 |
| 3805 | Tmem164    | -1.63 |
| 3806 | Cbr1       | -1.63 |
| 3807 | Cbr1       | -1.63 |
| 3808 | Rhbdd2     | -1.63 |
| 3809 | Retn       | -1.63 |
| 3810 | Grifin     | -1.63 |
| 3811 | RGD1310110 | -1.63 |
| 3812 | Rarb       | -1.63 |
| 3813 | Bcl2l2     | -1.63 |
| 3814 | C1qtnf9    | -1.63 |
| 3815 | Clybl      | -1.63 |
| 3816 | Pcdh7      | -1.63 |
| 3817 | Stbd1      | -1.63 |
| 3818 | Evi5       | -1.63 |
| 3819 | Sgcb       | -1.63 |
| 3820 | Pdgfrl     | -1.63 |
| 3821 | Irfg1      | -1.63 |
| 3822 | Cdh13      | -1.63 |
| 3823 | Bex4       | -1.63 |
| 3824 | LOC606294  | -1.64 |
| 3825 | C2         | -1.64 |
| 3826 | Clic2      | -1.64 |
| 3827 | Tm7sf2     | -1.64 |
| 3828 | Osbpl5     | -1.64 |
| 3829 | Trim3      | -1.64 |
| 3830 | Apoe       | -1.64 |
| 3831 | Sepw1      | -1.64 |
| 3832 | Sepw1      | -1.64 |
| 3833 | Pla2g16    | -1.64 |
| 3834 | Kazald1    | -1.64 |
| 3835 | Smc3       | -1.64 |
| 3836 | Ext2       | -1.64 |
| 3837 | Zfyve16    | -1.64 |
| 3838 | Erap1      | -1.64 |



|      |           |       |
|------|-----------|-------|
| 3839 | Sucnr1    | -1.64 |
| 3840 | Paqr6     | -1.64 |
| 3841 | Dpyd      | -1.64 |
| 3842 | Fbxo44    | -1.64 |
| 3843 | Maged2    | -1.64 |
| 3844 | Eno2      | -1.64 |
| 3845 | Fkbp14    | -1.64 |
| 3846 | Plxnb2    | -1.64 |
| 3847 | Ormdl2    | -1.64 |
| 3848 | Ptpn21    | -1.64 |
| 3849 | Synj2bp   | -1.64 |
| 3850 | Dtd2      | -1.64 |
| 3851 | Adi1      | -1.64 |
| 3852 | Dync1h1   | -1.64 |
| 3853 | Mterfd2   | -1.64 |
| 3854 | LOC501110 | -1.64 |
| 3855 | Eno2      | -1.64 |
| 3856 | Nck1      | -1.64 |
| 3857 | Ecsit     | -1.64 |
| 3858 | Zfp426    | -1.64 |
| 3859 | Vkorc1l1  | -1.64 |
| 3860 | Snpc5     | -1.64 |
| 3861 | Epm2aip1  | -1.64 |
| 3862 | Ngfrap1   | -1.64 |
| 3863 | Cbr1      | -1.64 |
| 3864 | Trim37    | -1.64 |
| 3865 | Marf1     | -1.64 |
| 3866 | Slc45a3   | -1.64 |
| 3867 | Tpst1     | -1.64 |
| 3868 | Cab39l    | -1.64 |
| 3869 | Spon2     | -1.64 |
| 3870 | Nipsnap1  | -1.64 |
| 3871 | Elovl2    | -1.64 |
| 3872 | Vps35     | -1.64 |
| 3873 | Lhfpl5    | -1.65 |
| 3874 | Agpat3    | -1.65 |
| 3875 | Gprc5b    | -1.65 |
| 3876 | Sfxn3     | -1.65 |
| 3877 | Gpsm2     | -1.65 |
| 3878 | Ccdc28b   | -1.65 |
| 3879 | Maged2    | -1.65 |

|      |            |       |
|------|------------|-------|
| 3880 | Maged2     | -1.65 |
| 3881 | Clstn3     | -1.65 |
| 3882 | Ctnna2     | -1.65 |
| 3883 | Ccdc132    | -1.65 |
| 3884 | Cav2       | -1.65 |
| 3885 | Lynx1      | -1.65 |
| 3886 | Nubpl      | -1.65 |
| 3887 | Tex264     | -1.65 |
| 3888 | Tpm1       | -1.65 |
| 3889 | Tpm1       | -1.65 |
| 3890 | C1qtnf5    | -1.65 |
| 3891 | Hexa       | -1.65 |
| 3892 | Dusp3      | -1.65 |
| 3893 | Marf1      | -1.65 |
| 3894 | Mrc2       | -1.65 |
| 3895 | Pds5b      | -1.65 |
| 3896 | Pds5b      | -1.65 |
| 3897 | Fhit       | -1.65 |
| 3898 | Nudt18     | -1.65 |
| 3899 | Esd        | -1.65 |
| 3900 | Sncg       | -1.65 |
| 3901 | Spata24    | -1.65 |
| 3902 | RGD1302996 | -1.66 |
| 3903 | Apba2      | -1.66 |
| 3904 | Bola1      | -1.66 |
| 3905 | Snapin     | -1.66 |
| 3906 | Amigo1     | -1.66 |
| 3907 | Mcart1     | -1.66 |
| 3908 | Grhpr      | -1.66 |
| 3909 | Chn2       | -1.66 |
| 3910 | Ppfibp1    | -1.66 |
| 3911 | LOC691921  | -1.66 |
| 3912 | Ndufa10l1  | -1.66 |
| 3913 | Ndufa10    | -1.66 |
| 3914 | Chrn4      | -1.66 |
| 3915 | Tep1       | -1.66 |
| 3916 | Rnase1l2   | -1.66 |
| 3917 | Esd        | -1.66 |
| 3918 | Xpo1       | -1.66 |
| 3919 | Cxxc5      | -1.66 |
| 3920 | Tmem132a   | -1.67 |

|      |            |       |
|------|------------|-------|
| 3921 | Ppp2r5b    | -1.67 |
| 3922 | Ppp2r5b    | -1.67 |
| 3923 | Etfb       | -1.67 |
| 3924 | Calm3      | -1.67 |
| 3925 | Kdelr1     | -1.67 |
| 3926 | Ndufc2     | -1.67 |
| 3927 | Tmem80     | -1.67 |
| 3928 | Col5a1     | -1.67 |
| 3929 | Vapb       | -1.67 |
| 3930 | Arhgef28   | -1.67 |
| 3931 | Mfn2       | -1.67 |
| 3932 | Wdr54      | -1.67 |
| 3933 | Cdk5       | -1.67 |
| 3934 | Fzd1       | -1.67 |
| 3935 | Mfap5      | -1.67 |
| 3936 | Arhgef25   | -1.67 |
| 3937 | Kcnk3      | -1.67 |
| 3938 | Prepl      | -1.67 |
| 3939 | Tmem42     | -1.67 |
| 3940 | Ap1s2      | -1.67 |
| 3941 | Trappc2    | -1.67 |
| 3942 | Flt4       | -1.67 |
| 3943 | Hsd11b1    | -1.67 |
| 3944 | Stmn4      | -1.67 |
| 3945 | Dhrs4      | -1.67 |
| 3946 | Scara3     | -1.67 |
| 3947 | Slc30a9    | -1.67 |
| 3948 | Ogdh       | -1.67 |
| 3949 | Efemp1     | -1.67 |
| 3950 | Mpp7       | -1.67 |
| 3951 | Hacl1      | -1.67 |
| 3952 | Rbl2       | -1.67 |
| 3953 | Rufy2      | -1.68 |
| 3954 | RGD1309594 | -1.68 |
| 3955 | Gfra1      | -1.68 |
| 3956 | LOC690344  | -1.68 |
| 3957 | Dact2      | -1.68 |
| 3958 | Hddc3      | -1.68 |
| 3959 | Pdcl       | -1.68 |
| 3960 | Ivd        | -1.68 |
| 3961 | Gnas       | -1.68 |

|      |            |       |
|------|------------|-------|
| 3962 | Mab21l1    | -1.68 |
| 3963 | Aqp7       | -1.68 |
| 3964 | Smim8      | -1.68 |
| 3965 | Gdap1      | -1.68 |
| 3966 | MGC94199   | -1.68 |
| 3967 | MGC94199   | -1.68 |
| 3968 | Aco1       | -1.68 |
| 3969 | Suclg1     | -1.68 |
| 3970 | Zfp385a    | -1.68 |
| 3971 | Cnpy2      | -1.68 |
| 3972 | Hadhb      | -1.68 |
| 3973 | Rab12      | -1.68 |
| 3974 | Htr2b      | -1.68 |
| 3975 | Gls        | -1.68 |
| 3976 | Spats2l    | -1.68 |
| 3977 | Ramp1      | -1.68 |
| 3978 | Tpm1       | -1.68 |
| 3979 | Nnmt       | -1.68 |
| 3980 | B4galt4    | -1.68 |
| 3981 | Tada2a     | -1.68 |
| 3982 | RGD1305733 | -1.68 |
| 3983 | Rxrg       | -1.68 |
| 3984 | Stmn4      | -1.68 |
| 3985 | Esd        | -1.68 |
| 3986 | Cln5       | -1.68 |
| 3987 | Erlec1     | -1.68 |
| 3988 | Crmp1      | -1.68 |
| 3989 | Hfe        | -1.68 |
| 3990 | Uqcc2      | -1.69 |
| 3991 | Tmem109    | -1.69 |
| 3992 | Anpep      | -1.69 |
| 3993 | Cpt1c      | -1.69 |
| 3994 | Rmnd1      | -1.69 |
| 3995 | Echdc1     | -1.69 |
| 3996 | RGD1565059 | -1.69 |
| 3997 | Hspa4l     | -1.69 |
| 3998 | Gba        | -1.69 |
| 3999 | Per3       | -1.69 |
| 4000 | Pm20d2     | -1.69 |
| 4001 | Trappc3    | -1.69 |
| 4002 | Plekhg5    | -1.69 |

|      |           |       |
|------|-----------|-------|
| 4003 | Mansc1    | -1.69 |
| 4004 | Thns12    | -1.69 |
| 4005 | Mest      | -1.69 |
| 4006 | Rarg      | -1.69 |
| 4007 | Erb3      | -1.69 |
| 4008 | Ifi2712b  | -1.69 |
| 4009 | Prima1    | -1.69 |
| 4010 | Dnal1     | -1.69 |
| 4011 | Gorasp1   | -1.69 |
| 4012 | Tpm1      | -1.69 |
| 4013 | LOC679038 | -1.69 |
| 4014 | Magee1    | -1.69 |
| 4015 | Bex2      | -1.69 |
| 4016 | Fstl1     | -1.69 |
| 4017 | Ccdc47    | -1.69 |
| 4018 | Med31     | -1.69 |
| 4019 | Steap3    | -1.69 |
| 4020 | Fam129a   | -1.69 |
| 4021 | Stmn4     | -1.69 |
| 4022 | Kpna3     | -1.69 |
| 4023 | Cdad1     | -1.69 |
| 4024 | Rcbt2     | -1.69 |
| 4025 | Nucb2     | -1.7  |
| 4026 | Ech1      | -1.7  |
| 4027 | Hsd17b12  | -1.7  |
| 4028 | Tmx2      | -1.7  |
| 4029 | Slc4a10   | -1.7  |
| 4030 | Aven      | -1.7  |
| 4031 | Prnp      | -1.7  |
| 4032 | Ift52     | -1.7  |
| 4033 | Olfml3    | -1.7  |
| 4034 | Snx27     | -1.7  |
| 4035 | Snx27     | -1.7  |
| 4036 | Cntfr     | -1.7  |
| 4037 | Lym2      | -1.7  |
| 4038 | Tex261    | -1.7  |
| 4039 | Itpr1     | -1.7  |
| 4040 | Zfp385a   | -1.7  |
| 4041 | Mapk12    | -1.7  |
| 4042 | Tmtc3     | -1.7  |
| 4043 | Trappc6b  | -1.7  |

|      |            |       |
|------|------------|-------|
| 4044 | RGD1562284 | -1.7  |
| 4045 | Tmem178a   | -1.7  |
| 4046 | Nrcam      | -1.7  |
| 4047 | Btbd6      | -1.7  |
| 4048 | Mrpl30     | -1.7  |
| 4049 | Irak1bp1   | -1.7  |
| 4050 | Cish       | -1.7  |
| 4051 | Car5b      | -1.7  |
| 4052 | Pigp       | -1.7  |
| 4053 | Rufy1      | -1.7  |
| 4054 | Irf6       | -1.7  |
| 4055 | Rc3tb1     | -1.7  |
| 4056 | Acyp2      | -1.7  |
| 4057 | Abcg311    | -1.7  |
| 4058 | Nqo2       | -1.7  |
| 4059 | Arhgap12   | -1.7  |
| 4060 | Mrpl34     | -1.7  |
| 4061 | Cog4       | -1.7  |
| 4062 | RGD735029  | -1.7  |
| 4063 | Myof       | -1.71 |
| 4064 | Serping1   | -1.71 |
| 4065 | Ptger3     | -1.71 |
| 4066 | Slc27a3    | -1.71 |
| 4067 | Elovl7     | -1.71 |
| 4068 | Sgtb       | -1.71 |
| 4069 | Gpx7       | -1.71 |
| 4070 | Smim8      | -1.71 |
| 4071 | Clvs1      | -1.71 |
| 4072 | Slc31a1    | -1.71 |
| 4073 | Cyp51      | -1.71 |
| 4074 | Itpr1      | -1.71 |
| 4075 | Itpr1      | -1.71 |
| 4076 | Zfp385a    | -1.71 |
| 4077 | Itgb1bp1   | -1.71 |
| 4078 | Fbxl17     | -1.71 |
| 4079 | Ndufs1     | -1.71 |
| 4080 | Emr1       | -1.71 |
| 4081 | Nrp2       | -1.71 |
| 4082 | Hmbs       | -1.71 |
| 4083 | Lima1      | -1.71 |
| 4084 | Maob       | -1.71 |

|      |           |       |
|------|-----------|-------|
| 4085 | Xiap      | -1.71 |
| 4086 | Cep19     | -1.71 |
| 4087 | Nit2      | -1.71 |
| 4088 | Dcakd     | -1.71 |
| 4089 | Kcnmb1    | -1.71 |
| 4090 | Stmn4     | -1.71 |
| 4091 | Nkiras1   | -1.71 |
| 4092 | Prorsd1   | -1.71 |
| 4093 | Sult5a1   | -1.71 |
| 4094 | Chtf8     | -1.71 |
| 4095 | Wdr7      | -1.71 |
| 4096 | Rufy2     | -1.72 |
| 4097 | Glo1      | -1.72 |
| 4098 | Cacng7    | -1.72 |
| 4099 | Ttyh1     | -1.72 |
| 4100 | Pias3     | -1.72 |
| 4101 | Gata2     | -1.72 |
| 4102 | Vwf       | -1.72 |
| 4103 | Ppp1r1a   | -1.72 |
| 4104 | Mfsd12    | -1.72 |
| 4105 | Nabp2     | -1.72 |
| 4106 | Cpq       | -1.72 |
| 4107 | Mtm1      | -1.72 |
| 4108 | Hibch     | -1.72 |
| 4109 | Mrpl30    | -1.72 |
| 4110 | Acadl     | -1.72 |
| 4111 | Il20rb    | -1.72 |
| 4112 | Itga11    | -1.72 |
| 4113 | Aldh3a2   | -1.72 |
| 4114 | Cpd       | -1.72 |
| 4115 | Nme7      | -1.72 |
| 4116 | Vsig10    | -1.72 |
| 4117 | Fdft1     | -1.72 |
| 4118 | Cytl1     | -1.72 |
| 4119 | Acbd5     | -1.72 |
| 4120 | Camlg     | -1.72 |
| 4121 | Dhtkd1    | -1.72 |
| 4122 | Cul4a     | -1.72 |
| 4123 | Kiaa0895l | -1.72 |
| 4124 | Nrep      | -1.72 |
| 4125 | Ddr1      | -1.73 |

|      |            |       |
|------|------------|-------|
| 4126 | Cebpa      | -1.73 |
| 4127 | Cebpa      | -1.73 |
| 4128 | Cebpa      | -1.73 |
| 4129 | Rab38      | -1.73 |
| 4130 | Marveld1   | -1.73 |
| 4131 | Phactr3    | -1.73 |
| 4132 | Scg5       | -1.73 |
| 4133 | Dtd1       | -1.73 |
| 4134 | Cdh6       | -1.73 |
| 4135 | Arhgap29   | -1.73 |
| 4136 | Ppa2       | -1.73 |
| 4137 | Agrn       | -1.73 |
| 4138 | Bet1       | -1.73 |
| 4139 | C1r        | -1.73 |
| 4140 | Cbx5       | -1.73 |
| 4141 | Cyp2d4     | -1.73 |
| 4142 | Cmc1       | -1.73 |
| 4143 | Aplp2      | -1.73 |
| 4144 | Mre11a     | -1.73 |
| 4145 | Tspan6     | -1.73 |
| 4146 | Pir        | -1.73 |
| 4147 | Fundc1     | -1.73 |
| 4148 | RGD1565033 | -1.73 |
| 4149 | Myoc       | -1.73 |
| 4150 | Stmn4      | -1.73 |
| 4151 | Tm9sf2     | -1.73 |
| 4152 | Alb        | -1.73 |
| 4153 | Arhgap21   | -1.73 |
| 4154 | Echdc3     | -1.73 |
| 4155 | Plvap      | -1.73 |
| 4156 | Sult5a1    | -1.73 |
| 4157 | Lman1      | -1.73 |
| 4158 | Ankrd29    | -1.73 |
| 4159 | Dym        | -1.73 |
| 4160 | Rbfa       | -1.73 |
| 4161 | Ddr1       | -1.74 |
| 4162 | Dpp3       | -1.74 |
| 4163 | Mapk3      | -1.74 |
| 4164 | Pwwp2b     | -1.74 |
| 4165 | Fbn1       | -1.74 |
| 4166 | Cat        | -1.74 |



|      |            |       |
|------|------------|-------|
| 4167 | RGD1309540 | -1.74 |
| 4168 | Npr1       | -1.74 |
| 4169 | Cldn11     | -1.74 |
| 4170 | Ttc33      | -1.74 |
| 4171 | Wdr47      | -1.74 |
| 4172 | Adh5       | -1.74 |
| 4173 | Elk3       | -1.74 |
| 4174 | Itga7      | -1.74 |
| 4175 | Snx6       | -1.74 |
| 4176 | Trak2      | -1.74 |
| 4177 | Slc29a1    | -1.74 |
| 4178 | Acsbg1     | -1.74 |
| 4179 | Aplp2      | -1.74 |
| 4180 | Ubqln2     | -1.74 |
| 4181 | Leprel1    | -1.74 |
| 4182 | Jam2       | -1.74 |
| 4183 | LOC691995  | -1.74 |
| 4184 | Nudcd2     | -1.74 |
| 4185 | Slc36a1    | -1.74 |
| 4186 | Nfatc4     | -1.74 |
| 4187 | Mtmr6      | -1.74 |
| 4188 | Erlin2     | -1.74 |
| 4189 | Nat1       | -1.74 |
| 4190 | Cyp4v3     | -1.74 |
| 4191 | LOC363337  | -1.74 |
| 4192 | Mmp2       | -1.74 |
| 4193 | Cdh11      | -1.74 |
| 4194 | Cdo1       | -1.74 |
| 4195 | Morn4      | -1.75 |
| 4196 | Ttc23      | -1.75 |
| 4197 | Ak1        | -1.75 |
| 4198 | Mocs2      | -1.75 |
| 4199 | Kcnn3      | -1.75 |
| 4200 | Scp2       | -1.75 |
| 4201 | Trim32     | -1.75 |
| 4202 | Pmm1       | -1.75 |
| 4203 | Tst        | -1.75 |
| 4204 | Agr2       | -1.75 |
| 4205 | Wdr6       | -1.75 |
| 4206 | Map4       | -1.75 |
| 4207 | Foxo4      | -1.75 |

|      |          |       |
|------|----------|-------|
| 4208 | Jup      | -1.75 |
| 4209 | Prelp    | -1.75 |
| 4210 | Zfp358   | -1.75 |
| 4211 | Xpo7     | -1.75 |
| 4212 | Stmn4    | -1.75 |
| 4213 | Cryl1    | -1.75 |
| 4214 | Abcg3l3  | -1.75 |
| 4215 | Epha5    | -1.75 |
| 4216 | Mxd4     | -1.75 |
| 4217 | Slc35f1  | -1.76 |
| 4218 | Tmem135  | -1.76 |
| 4219 | Fah      | -1.76 |
| 4220 | Plin1    | -1.76 |
| 4221 | Cebpa    | -1.76 |
| 4222 | Fads1    | -1.76 |
| 4223 | Syt7     | -1.76 |
| 4224 | Btrc     | -1.76 |
| 4225 | Agpat2   | -1.76 |
| 4226 | Hrh3     | -1.76 |
| 4227 | Rfesd    | -1.76 |
| 4228 | Psip1    | -1.76 |
| 4229 | Pon3     | -1.76 |
| 4230 | Wipf3    | -1.76 |
| 4231 | Zfp637   | -1.76 |
| 4232 | Zhx1     | -1.76 |
| 4233 | Nabp2    | -1.76 |
| 4234 | Tmem106c | -1.76 |
| 4235 | Lpin1    | -1.76 |
| 4236 | Col3a1   | -1.76 |
| 4237 | Efhd1    | -1.76 |
| 4238 | Rai2     | -1.76 |
| 4239 | Mfap3    | -1.76 |
| 4240 | Slc25a35 | -1.76 |
| 4241 | Lgi3     | -1.76 |
| 4242 | Amph     | -1.76 |
| 4243 | Sncb     | -1.76 |
| 4244 | Nat1     | -1.76 |
| 4245 | Ces1c    | -1.76 |
| 4246 | Pcdhgc3  | -1.76 |
| 4247 | Polr2i   | -1.77 |
| 4248 | Zfp40    | -1.77 |

|      |            |       |
|------|------------|-------|
| 4249 | Polr2i     | -1.77 |
| 4250 | Bcat2      | -1.77 |
| 4251 | Ptdss2     | -1.77 |
| 4252 | Add3       | -1.77 |
| 4253 | Kif16b     | -1.77 |
| 4254 | Tspan18    | -1.77 |
| 4255 | Zfp467     | -1.77 |
| 4256 | Copg1      | -1.77 |
| 4257 | Creld1     | -1.77 |
| 4258 | Ift27      | -1.77 |
| 4259 | Mknk2      | -1.77 |
| 4260 | Atp7a      | -1.77 |
| 4261 | Dlg4       | -1.77 |
| 4262 | Cyb5r1     | -1.77 |
| 4263 | RGD1305110 | -1.77 |
| 4264 | Cxcl13     | -1.77 |
| 4265 | Dusp26     | -1.77 |
| 4266 | Rhobtb1    | -1.78 |
| 4267 | Tnxa-ps1   | -1.78 |
| 4268 | Pddc1      | -1.78 |
| 4269 | Pddc1      | -1.78 |
| 4270 | Uros       | -1.78 |
| 4271 | Sae1       | -1.78 |
| 4272 | Car11      | -1.78 |
| 4273 | Ndn        | -1.78 |
| 4274 | Tmem159    | -1.78 |
| 4275 | Cops2      | -1.78 |
| 4276 | Enpep      | -1.78 |
| 4277 | Drosha     | -1.78 |
| 4278 | Tmem246    | -1.78 |
| 4279 | C1qtnf6    | -1.78 |
| 4280 | LOC691849  | -1.78 |
| 4281 | Faim       | -1.78 |
| 4282 | Faim       | -1.78 |
| 4283 | Dmd        | -1.78 |
| 4284 | Mgat4b     | -1.78 |
| 4285 | Mgst3      | -1.78 |
| 4286 | Lmod1      | -1.78 |
| 4287 | Aida       | -1.78 |
| 4288 | Sccpdh     | -1.78 |
| 4289 | Sccpdh     | -1.78 |

|      |              |       |
|------|--------------|-------|
| 4290 | Mcoln1       | -1.78 |
| 4291 | Aaed1        | -1.78 |
| 4292 | Tdrp         | -1.78 |
| 4293 | Smpd3        | -1.78 |
| 4294 | Cnep1r1      | -1.78 |
| 4295 | Lrp5         | -1.79 |
| 4296 | Abhd12       | -1.79 |
| 4297 | Strbp        | -1.79 |
| 4298 | Cog6         | -1.79 |
| 4299 | Pik3r1       | -1.79 |
| 4300 | Impa1        | -1.79 |
| 4301 | Alg14        | -1.79 |
| 4302 | Nbl1         | -1.79 |
| 4303 | Eps15        | -1.79 |
| 4304 | Pros1        | -1.79 |
| 4305 | Cox16        | -1.79 |
| 4306 | Glb1l        | -1.79 |
| 4307 | LOC100360552 | -1.79 |
| 4308 | Dag1         | -1.79 |
| 4309 | Cdon         | -1.79 |
| 4310 | RGD1562618   | -1.79 |
| 4311 | Gprasp1      | -1.79 |
| 4312 | Dmd          | -1.79 |
| 4313 | Mpp2         | -1.79 |
| 4314 | Pdk2         | -1.79 |
| 4315 | Rilp         | -1.79 |
| 4316 | Zfp354a      | -1.79 |
| 4317 | Kif1c        | -1.79 |
| 4318 | Parp2        | -1.79 |
| 4319 | Akr1c14      | -1.79 |
| 4320 | Txndc15      | -1.79 |
| 4321 | Pard6g       | -1.79 |
| 4322 | Tcf19        | -1.8  |
| 4323 | I7Rn6        | -1.8  |
| 4324 | Lrrc4b       | -1.8  |
| 4325 | Phox2a       | -1.8  |
| 4326 | LOC361635    | -1.8  |
| 4327 | Sptbn2       | -1.8  |
| 4328 | Ggt7         | -1.8  |
| 4329 | Dusp19       | -1.8  |

|      |          |       |
|------|----------|-------|
| 4330 | Milt11   | -1.8  |
| 4331 | Sulf1    | -1.8  |
| 4332 | Fktn     | -1.8  |
| 4333 | Cav1     | -1.8  |
| 4334 | Cyb5r3   | -1.8  |
| 4335 | Myg1     | -1.8  |
| 4336 | Vsnl1    | -1.8  |
| 4337 | Rdh14    | -1.8  |
| 4338 | Ncam1    | -1.8  |
| 4339 | Adcy6    | -1.8  |
| 4340 | Gnl3l    | -1.8  |
| 4341 | Tmem47   | -1.8  |
| 4342 | C2cd2    | -1.8  |
| 4343 | Ppl      | -1.8  |
| 4344 | Ctxn1    | -1.8  |
| 4345 | Lrpap1   | -1.8  |
| 4346 | Tmem184c | -1.8  |
| 4347 | Cpeb1    | -1.81 |
| 4348 | Bex1     | -1.81 |
| 4349 | Zfp260   | -1.81 |
| 4350 | Zfp260   | -1.81 |
| 4351 | Add3     | -1.81 |
| 4352 | Ywhab    | -1.81 |
| 4353 | S100a16  | -1.81 |
| 4354 | Clcn6    | -1.81 |
| 4355 | Hdac11   | -1.81 |
| 4356 | Dcn      | -1.81 |
| 4357 | Ly6e     | -1.81 |
| 4358 | Adcy6    | -1.81 |
| 4359 | Atp6v1a  | -1.81 |
| 4360 | Syng3    | -1.81 |
| 4361 | Rgs7     | -1.81 |
| 4362 | Cnpy4    | -1.81 |
| 4363 | Ift81    | -1.81 |
| 4364 | Ang1     | -1.81 |
| 4365 | Tbc1d19  | -1.81 |
| 4366 | Psat1    | -1.82 |
| 4367 | Arhgap35 | -1.82 |
| 4368 | Syt9     | -1.82 |
| 4369 | Ina      | -1.82 |
| 4370 | Ptgfr    | -1.82 |

|      |           |       |
|------|-----------|-------|
| 4371 | Pla2g5    | -1.82 |
| 4372 | Mrpl50    | -1.82 |
| 4373 | Sh3gl2    | -1.82 |
| 4374 | Sema3c    | -1.82 |
| 4375 | Acn9      | -1.82 |
| 4376 | Rassf9    | -1.82 |
| 4377 | Ankmy2    | -1.82 |
| 4378 | Rapgef5   | -1.82 |
| 4379 | Pde6d     | -1.82 |
| 4380 | Dmd       | -1.82 |
| 4381 | Pgrmc1    | -1.82 |
| 4382 | LOC360228 | -1.82 |
| 4383 | Thra      | -1.82 |
| 4384 | Acbd4     | -1.82 |
| 4385 | Pea15     | -1.82 |
| 4386 | Uhmk1     | -1.82 |
| 4387 | Fam20c    | -1.82 |
| 4388 | Ppp3cb    | -1.82 |
| 4389 | Cd99l2    | -1.82 |
| 4390 | Zeb1      | -1.82 |
| 4391 | Tmem255b  | -1.82 |
| 4392 | Ddo       | -1.83 |
| 4393 | Ap1p1     | -1.83 |
| 4394 | Fam168a   | -1.83 |
| 4395 | Cd1d1     | -1.83 |
| 4396 | Itga1     | -1.83 |
| 4397 | Arhgef11  | -1.83 |
| 4398 | Mxra8     | -1.83 |
| 4399 | Cav1      | -1.83 |
| 4400 | Adcyap1r1 | -1.83 |
| 4401 | Adcyap1r1 | -1.83 |
| 4402 | Adcyap1r1 | -1.83 |
| 4403 | Adcyap1r1 | -1.83 |
| 4404 | Adcyap1r1 | -1.83 |
| 4405 | Tmpo      | -1.83 |
| 4406 | Lztfl1    | -1.83 |
| 4407 | Pth1r     | -1.83 |
| 4408 | Fxyd6     | -1.83 |
| 4409 | Cln6      | -1.83 |
| 4410 | Tcaim     | -1.83 |
| 4411 | Syn1      | -1.83 |

|      |            |       |
|------|------------|-------|
| 4412 | Sms        | -1.83 |
| 4413 | Bace2      | -1.83 |
| 4414 | C1qtnf2    | -1.83 |
| 4415 | Ctc1       | -1.83 |
| 4416 | Slc29a4    | -1.83 |
| 4417 | Pcca       | -1.83 |
| 4418 | Cplx1      | -1.83 |
| 4419 | Epdr1      | -1.83 |
| 4420 | Net1       | -1.83 |
| 4421 | Abhd8      | -1.83 |
| 4422 | Mt3        | -1.83 |
| 4423 | Lrrtm3     | -1.84 |
| 4424 | Mcee       | -1.84 |
| 4425 | Pygb       | -1.84 |
| 4426 | Ampd2      | -1.84 |
| 4427 | Adcyap1r1  | -1.84 |
| 4428 | Shank3     | -1.84 |
| 4429 | Abhd14a    | -1.84 |
| 4430 | Msantd4    | -1.84 |
| 4431 | Celf6      | -1.84 |
| 4432 | Nme6       | -1.84 |
| 4433 | Figf       | -1.84 |
| 4434 | Dynlt3     | -1.84 |
| 4435 | Syn1       | -1.84 |
| 4436 | Sep-04     | -1.84 |
| 4437 | Acad10     | -1.84 |
| 4438 | Ap3m1      | -1.84 |
| 4439 | Klhl5      | -1.84 |
| 4440 | Bloc1s5    | -1.84 |
| 4441 | Tubb3      | -1.84 |
| 4442 | Gng3       | -1.85 |
| 4443 | RGD1311021 | -1.85 |
| 4444 | Mapk8ip1   | -1.85 |
| 4445 | Thap3      | -1.85 |
| 4446 | Lactb2     | -1.85 |
| 4447 | Pla2g2d    | -1.85 |
| 4448 | Abcc9      | -1.85 |
| 4449 | Ptn        | -1.85 |
| 4450 | Ica1       | -1.85 |
| 4451 | Ccdc91     | -1.85 |
| 4452 | Notch3     | -1.85 |

|      |         |       |
|------|---------|-------|
| 4453 | Arhgap5 | -1.85 |
| 4454 | Pdffd   | -1.85 |
| 4455 | RragB   | -1.85 |
| 4456 | RragB   | -1.85 |
| 4457 | Adipoq  | -1.85 |
| 4458 | Mx1     | -1.85 |
| 4459 | Mx1     | -1.85 |
| 4460 | Mx1     | -1.85 |
| 4461 | Mx1     | -1.85 |
| 4462 | Mx1     | -1.85 |
| 4463 | Tnfsf12 | -1.85 |
| 4464 | Tom1l2  | -1.85 |
| 4465 | Plscr3  | -1.85 |
| 4466 | Mblac1  | -1.85 |
| 4467 | Cd99l2  | -1.85 |
| 4468 | Scarb2  | -1.85 |
| 4469 | Vstm4   | -1.85 |
| 4470 | Gstt1   | -1.86 |
| 4471 | Pofut1  | -1.86 |
| 4472 | Stxbp1  | -1.86 |
| 4473 | B3galt1 | -1.86 |
| 4474 | Zfp133  | -1.86 |
| 4475 | Fam151b | -1.86 |
| 4476 | Lurap1l | -1.86 |
| 4477 | Tcf7l1  | -1.86 |
| 4478 | Mrps33  | -1.86 |
| 4479 | Ikbip   | -1.86 |
| 4480 | Tshr    | -1.86 |
| 4481 | Ppil3   | -1.86 |
| 4482 | Vmac    | -1.86 |
| 4483 | Bcs1l   | -1.86 |
| 4484 | Bace1   | -1.86 |
| 4485 | Srpx    | -1.86 |
| 4486 | Mx1     | -1.86 |
| 4487 | Ccdc50  | -1.86 |
| 4488 | Aldoc   | -1.86 |
| 4489 | Myh11   | -1.86 |
| 4490 | Cntn2   | -1.86 |
| 4491 | Rab2b   | -1.86 |
| 4492 | Afap1   | -1.86 |
| 4493 | Pik3r2  | -1.86 |



|      |          |       |
|------|----------|-------|
| 4494 | Mc2r     | -1.86 |
| 4495 | Pcyox1l  | -1.86 |
| 4496 | Cables1  | -1.86 |
| 4497 | Ak3      | -1.87 |
| 4498 | Ltbp4    | -1.87 |
| 4499 | Dlg2     | -1.87 |
| 4500 | Arrb1    | -1.87 |
| 4501 | Smarca2  | -1.87 |
| 4502 | Apmmap   | -1.87 |
| 4503 | Mocs2    | -1.87 |
| 4504 | Tmeff1   | -1.87 |
| 4505 | Stmn1    | -1.87 |
| 4506 | C1s      | -1.87 |
| 4507 | Cbx3     | -1.87 |
| 4508 | Sqle     | -1.87 |
| 4509 | Hoxc9    | -1.87 |
| 4510 | Rab23    | -1.87 |
| 4511 | Rdx      | -1.87 |
| 4512 | Tmem204  | -1.87 |
| 4513 | Myh3     | -1.87 |
| 4514 | Dynll2   | -1.87 |
| 4515 | Fmo4     | -1.87 |
| 4516 | Dock9    | -1.87 |
| 4517 | Mtmr9    | -1.87 |
| 4518 | Mmp14    | -1.87 |
| 4519 | Slc25a42 | -1.87 |
| 4520 | Lonp2    | -1.87 |
| 4521 | Dpep1    | -1.87 |
| 4522 | Atp6v1g2 | -1.88 |
| 4523 | Tspyl4   | -1.88 |
| 4524 | Echs1    | -1.88 |
| 4525 | St5      | -1.88 |
| 4526 | Echs1    | -1.88 |
| 4527 | Prkci    | -1.88 |
| 4528 | Fam172a  | -1.88 |
| 4529 | Zfp691   | -1.88 |
| 4530 | Lepr     | -1.88 |
| 4531 | Oscp1    | -1.88 |
| 4532 | Hibadh   | -1.88 |
| 4533 | Dpp6     | -1.88 |
| 4534 | Snx10    | -1.88 |

|      |            |       |
|------|------------|-------|
| 4535 | Ccdc53     | -1.88 |
| 4536 | Eml1       | -1.88 |
| 4537 | Copz2      | -1.88 |
| 4538 | Sertad4    | -1.88 |
| 4539 | Nmnat2     | -1.88 |
| 4540 | Gng2       | -1.88 |
| 4541 | Mk1        | -1.88 |
| 4542 | Lrrn4cl    | -1.89 |
| 4543 | Dut        | -1.89 |
| 4544 | Pfn2       | -1.89 |
| 4545 | Triqk      | -1.89 |
| 4546 | Clec14a    | -1.89 |
| 4547 | Phldb1     | -1.89 |
| 4548 | RGD1306954 | -1.89 |
| 4549 | Spns2      | -1.89 |
| 4550 | Paqr4      | -1.89 |
| 4551 | Aoc3       | -1.89 |
| 4552 | Gng2       | -1.89 |
| 4553 | Limch1     | -1.89 |
| 4554 | Slc10a4    | -1.89 |
| 4555 | Pdgfra     | -1.89 |
| 4556 | Rab11fip2  | -1.9  |
| 4557 | Synm       | -1.9  |
| 4558 | Pdhx       | -1.9  |
| 4559 | Sh3glb2    | -1.9  |
| 4560 | Phgdh      | -1.9  |
| 4561 | Pfn2       | -1.9  |
| 4562 | Gpx8       | -1.9  |
| 4563 | Mme        | -1.9  |
| 4564 | Sfrp2      | -1.9  |
| 4565 | Hsdl2      | -1.9  |
| 4566 | Prkag2     | -1.9  |
| 4567 | Crebl2     | -1.9  |
| 4568 | Xrcc6bp1   | -1.9  |
| 4569 | RGD1309534 | -1.9  |
| 4570 | Ppm1f      | -1.9  |
| 4571 | Klhl22     | -1.9  |
| 4572 | Rangrf     | -1.9  |
| 4573 | Fcer1a     | -1.9  |
| 4574 | Prkar1b    | -1.9  |
| 4575 | Glt8d1     | -1.9  |

|      |          |       |
|------|----------|-------|
| 4576 | Dnase2   | -1.9  |
| 4577 | Ap3s2    | -1.91 |
| 4578 | L1cam    | -1.91 |
| 4579 | Sptan1   | -1.91 |
| 4580 | Psmc10   | -1.91 |
| 4581 | Eid1     | -1.91 |
| 4582 | Fahd2a   | -1.91 |
| 4583 | Hrh3     | -1.91 |
| 4584 | Pdgfc    | -1.91 |
| 4585 | Rab13    | -1.91 |
| 4586 | Nova1    | -1.91 |
| 4587 | Klc1     | -1.91 |
| 4588 | Klc1     | -1.91 |
| 4589 | Coa5     | -1.91 |
| 4590 | Vat1     | -1.91 |
| 4591 | Glod4    | -1.91 |
| 4592 | Ebpl     | -1.91 |
| 4593 | Ddc      | -1.91 |
| 4594 | Ddc      | -1.91 |
| 4595 | Gas6     | -1.91 |
| 4596 | Scoc     | -1.91 |
| 4597 | Zfp423   | -1.91 |
| 4598 | S100b    | -1.92 |
| 4599 | Clec11a  | -1.92 |
| 4600 | Ggta1p   | -1.92 |
| 4601 | Crat     | -1.92 |
| 4602 | Angptl2  | -1.92 |
| 4603 | Hrh3     | -1.92 |
| 4604 | Hrh3     | -1.92 |
| 4605 | Cetn3    | -1.92 |
| 4606 | Cetn3    | -1.92 |
| 4607 | Wls      | -1.92 |
| 4608 | Mfap2    | -1.92 |
| 4609 | Copg2    | -1.92 |
| 4610 | Mturn    | -1.92 |
| 4611 | Sntb1    | -1.92 |
| 4612 | Mapre3   | -1.92 |
| 4613 | Klc1     | -1.92 |
| 4614 | Tspan7   | -1.92 |
| 4615 | Slc25a19 | -1.92 |
| 4616 | Cdc42bpa | -1.92 |

|      |         |       |
|------|---------|-------|
| 4617 | Agtpbp1 | -1.92 |
| 4618 | Rab3a   | -1.92 |
| 4619 | Slc38a7 | -1.92 |
| 4620 | Ppp2r2b | -1.92 |
| 4621 | Pald1   | -1.93 |
| 4622 | Ide     | -1.93 |
| 4623 | Caly    | -1.93 |
| 4624 | Mettl10 | -1.93 |
| 4625 | Axl     | -1.93 |
| 4626 | Axl     | -1.93 |
| 4627 | Tspan4  | -1.93 |
| 4628 | Tspan4  | -1.93 |
| 4629 | Olfml2a | -1.93 |
| 4630 | Hrh3    | -1.93 |
| 4631 | Abcd3   | -1.93 |
| 4632 | Gns     | -1.93 |
| 4633 | Gns     | -1.93 |
| 4634 | Kdelr3  | -1.93 |
| 4635 | Six1    | -1.93 |
| 4636 | Gsta3   | -1.93 |
| 4637 | Tmem107 | -1.93 |
| 4638 | Grb10   | -1.93 |
| 4639 | Ddc     | -1.93 |
| 4640 | Qdpr    | -1.93 |
| 4641 | Pgpep1  | -1.93 |
| 4642 | Mmp15   | -1.93 |
| 4643 | Tjp1    | -1.94 |
| 4644 | Map1b   | -1.94 |
| 4645 | Lix1l   | -1.94 |
| 4646 | Cald1   | -1.94 |
| 4647 | Csad    | -1.94 |
| 4648 | Csad    | -1.94 |
| 4649 | Dpysl5  | -1.94 |
| 4650 | Gsta3   | -1.94 |
| 4651 | Elovl4  | -1.94 |
| 4652 | Armcx2  | -1.94 |
| 4653 | Heph    | -1.94 |
| 4654 | Prph    | -1.94 |
| 4655 | Arl6    | -1.94 |
| 4656 | Cdip1   | -1.94 |
| 4657 | Zdhhc2  | -1.94 |

|      |          |       |
|------|----------|-------|
| 4658 | Tppp     | -1.95 |
| 4659 | Rabgap1  | -1.95 |
| 4660 | Ndr3     | -1.95 |
| 4661 | Fhl5     | -1.95 |
| 4662 | Nap1l5   | -1.95 |
| 4663 | Dync1i1  | -1.95 |
| 4664 | Dgkb     | -1.95 |
| 4665 | Gsta3    | -1.95 |
| 4666 | Cacnb3   | -1.95 |
| 4667 | Plekhh3  | -1.95 |
| 4668 | Gas7     | -1.95 |
| 4669 | Trappc1  | -1.95 |
| 4670 | Fzd2     | -1.95 |
| 4671 | Sh3pxd2a | -1.96 |
| 4672 | Nudt22   | -1.96 |
| 4673 | Cdc42ep5 | -1.96 |
| 4674 | Dut      | -1.96 |
| 4675 | Elovl6   | -1.96 |
| 4676 | Nnt      | -1.96 |
| 4677 | F3       | -1.96 |
| 4678 | Elovl6   | -1.96 |
| 4679 | Wls      | -1.96 |
| 4680 | Alg2     | -1.96 |
| 4681 | Ddx58    | -1.96 |
| 4682 | Fbxl4    | -1.96 |
| 4683 | Mb       | -1.96 |
| 4684 | Acvr1l   | -1.96 |
| 4685 | Magt1    | -1.96 |
| 4686 | Nsg2     | -1.96 |
| 4687 | Tpsb2    | -1.96 |
| 4688 | Rdm1     | -1.96 |
| 4689 | Glg1     | -1.96 |
| 4690 | Cend1    | -1.97 |
| 4691 | Cend1    | -1.97 |
| 4692 | Nipa1    | -1.97 |
| 4693 | Rtn2     | -1.97 |
| 4694 | Acvr1c   | -1.97 |
| 4695 | Gstm2    | -1.97 |
| 4696 | Ston1    | -1.97 |
| 4697 | Tubb4a   | -1.97 |
| 4698 | lft46    | -1.97 |

|      |           |       |
|------|-----------|-------|
| 4699 | Col8a1    | -1.97 |
| 4700 | Abca8a    | -1.97 |
| 4701 | Ebf1      | -1.97 |
| 4702 | Mmd2      | -1.97 |
| 4703 | Sorbs3    | -1.97 |
| 4704 | Nt5dc2    | -1.97 |
| 4705 | Nr3c1     | -1.97 |
| 4706 | Rnf14     | -1.97 |
| 4707 | Caly      | -1.98 |
| 4708 | Fam69b    | -1.98 |
| 4709 | Ptpa      | -1.98 |
| 4710 | Ddah1     | -1.98 |
| 4711 | Fkbp9     | -1.98 |
| 4712 | Nudt12    | -1.98 |
| 4713 | Kdelc2    | -1.98 |
| 4714 | Dnm1l     | -1.98 |
| 4715 | Fn3krp    | -1.98 |
| 4716 | Tomm40l   | -1.98 |
| 4717 | Fmo4      | -1.98 |
| 4718 | Gatsl3    | -1.98 |
| 4719 | Ushbp1    | -1.98 |
| 4720 | Ehd2      | -1.99 |
| 4721 | Sbsn      | -1.99 |
| 4722 | Adamtsl4  | -1.99 |
| 4723 | C1qa      | -1.99 |
| 4724 | Lpar1     | -1.99 |
| 4725 | Wwp1      | -1.99 |
| 4726 | Serpina12 | -1.99 |
| 4727 | Smc6      | -1.99 |
| 4728 | Pam       | -1.99 |
| 4729 | Scg3      | -1.99 |
| 4730 | Scn3b     | -1.99 |
| 4731 | Gnb5      | -1.99 |
| 4732 | C1galt1c1 | -1.99 |
| 4733 | Ctps2     | -1.99 |
| 4734 | Gpm6b     | -1.99 |
| 4735 | Armcx1    | -1.99 |
| 4736 | Armcx1    | -1.99 |
| 4737 | Fopnl     | -1.99 |
| 4738 | Thsd1     | -1.99 |
| 4739 | Acat2     | -2    |

|      |            |       |
|------|------------|-------|
| 4740 | Tmem223    | -2    |
| 4741 | Stmn3      | -2    |
| 4742 | Sulf2      | -2    |
| 4743 | Cyp2j4     | -2    |
| 4744 | Ccl21      | -2    |
| 4745 | Mir3577    | -2    |
| 4746 | Pip4k2b    | -2    |
| 4747 | Ska2       | -2    |
| 4748 | Fbxl16     | -2    |
| 4749 | Pdlim2     | -2    |
| 4750 | Meis1      | -2    |
| 4751 | Cdkl2      | -2    |
| 4752 | Akr1c19    | -2    |
| 4753 | Tlr3       | -2    |
| 4754 | Dync1li2   | -2    |
| 4755 | Ntrk1      | -2.01 |
| 4756 | Isl1       | -2.01 |
| 4757 | Gltpd1     | -2.01 |
| 4758 | Nfib       | -2.01 |
| 4759 | Rergl      | -2.01 |
| 4760 | RGD1565355 | -2.01 |
| 4761 | Prkar2b    | -2.01 |
| 4762 | Ptprn2     | -2.01 |
| 4763 | Acaca      | -2.01 |
| 4764 | Hoxb7      | -2.01 |
| 4765 | Cers4      | -2.01 |
| 4766 | Sh2d4a     | -2.01 |
| 4767 | Bmpr1a     | -2.01 |
| 4768 | Slc29a3    | -2.02 |
| 4769 | Fam26e     | -2.02 |
| 4770 | Tysnd1     | -2.02 |
| 4771 | Asrgl1     | -2.02 |
| 4772 | Utrn       | -2.02 |
| 4773 | Ttc30b     | -2.02 |
| 4774 | Pgrmc2     | -2.02 |
| 4775 | Rrm2b      | -2.02 |
| 4776 | Atcay      | -2.02 |
| 4777 | Clic5      | -2.02 |
| 4778 | Nicn1      | -2.02 |
| 4779 | Ophn1      | -2.02 |
| 4780 | Lrrc58     | -2.02 |

|      |            |       |
|------|------------|-------|
| 4781 | Ache       | -2.02 |
| 4782 | Ephx2      | -2.02 |
| 4783 | Ppp2r2c    | -2.02 |
| 4784 | Nsg1       | -2.02 |
| 4785 | Zadh2      | -2.02 |
| 4786 | Aldh1a7    | -2.03 |
| 4787 | Tmem126b   | -2.03 |
| 4788 | Rab3il1    | -2.03 |
| 4789 | Hrh3       | -2.03 |
| 4790 | Hrh3       | -2.03 |
| 4791 | Ptgfrn     | -2.03 |
| 4792 | Oxct1      | -2.03 |
| 4793 | Gpihbp1    | -2.03 |
| 4794 | RGD1310769 | -2.03 |
| 4795 | Kidins220  | -2.03 |
| 4796 | Pja2       | -2.03 |
| 4797 | Adam23     | -2.03 |
| 4798 | Zfp846     | -2.03 |
| 4799 | Cadm1      | -2.03 |
| 4800 | Clasp2     | -2.03 |
| 4801 | Apool      | -2.03 |
| 4802 | Mir568     | -2.03 |
| 4803 | Myh10      | -2.03 |
| 4804 | Sat2       | -2.03 |
| 4805 | Tmem130    | -2.03 |
| 4806 | Zdhhc1     | -2.03 |
| 4807 | Cyb5b      | -2.03 |
| 4808 | Ppp2r2b    | -2.03 |
| 4809 | Sdhaf2     | -2.04 |
| 4810 | Papss2     | -2.04 |
| 4811 | Chn1       | -2.04 |
| 4812 | Olfm1      | -2.04 |
| 4813 | Hrh3       | -2.04 |
| 4814 | Cpa3       | -2.04 |
| 4815 | Tspan12    | -2.04 |
| 4816 | RGD1565355 | -2.04 |
| 4817 | Tmem106b   | -2.04 |
| 4818 | Nipal2     | -2.04 |
| 4819 | Appl2      | -2.04 |
| 4820 | Tmem179    | -2.04 |
| 4821 | Sostdc1    | -2.04 |



|      |            |       |
|------|------------|-------|
| 4822 | Pja2       | -2.04 |
| 4823 | Snx33      | -2.04 |
| 4824 | Omd        | -2.04 |
| 4825 | Omd        | -2.04 |
| 4826 | Adrb3      | -2.04 |
| 4827 | Mri1       | -2.04 |
| 4828 | Pepd       | -2.05 |
| 4829 | Dmbt1      | -2.05 |
| 4830 | Plcb4      | -2.05 |
| 4831 | Gstm5      | -2.05 |
| 4832 | Gstm5      | -2.05 |
| 4833 | Ccnd2      | -2.05 |
| 4834 | Tns1       | -2.05 |
| 4835 | Gpc1       | -2.05 |
| 4836 | Wrb        | -2.05 |
| 4837 | Rab15      | -2.05 |
| 4838 | RGD1308147 | -2.05 |
| 4839 | Aspn       | -2.05 |
| 4840 | Aspn       | -2.05 |
| 4841 | Lipe       | -2.06 |
| 4842 | Slc22a18   | -2.06 |
| 4843 | Acvr1      | -2.06 |
| 4844 | Dbh        | -2.06 |
| 4845 | Ckmt1b     | -2.06 |
| 4846 | Klhl9      | -2.06 |
| 4847 | Lrp6       | -2.06 |
| 4848 | Kitlg      | -2.06 |
| 4849 | L3hypdh    | -2.06 |
| 4850 | Zfyve21    | -2.06 |
| 4851 | Enpp5      | -2.06 |
| 4852 | Cyp27a1    | -2.06 |
| 4853 | Thy1       | -2.06 |
| 4854 | RGD1561157 | -2.06 |
| 4855 | Trim35     | -2.06 |
| 4856 | Nr1d2      | -2.06 |
| 4857 | Tmem38a    | -2.06 |
| 4858 | Zcchc24    | -2.06 |
| 4859 | Th         | -2.07 |
| 4860 | Fcgrt      | -2.07 |
| 4861 | Vip        | -2.07 |
| 4862 | Mrgprf     | -2.07 |

|      |            |       |
|------|------------|-------|
| 4863 | Apip       | -2.07 |
| 4864 | Disp2      | -2.07 |
| 4865 | Camk2d     | -2.07 |
| 4866 | Ankrd46    | -2.07 |
| 4867 | Tmeff2     | -2.07 |
| 4868 | Dock6      | -2.07 |
| 4869 | Dbn1       | -2.07 |
| 4870 | Gstm7      | -2.08 |
| 4871 | Atp6v0e2   | -2.08 |
| 4872 | Kitlg      | -2.08 |
| 4873 | Sdc2       | -2.08 |
| 4874 | Rtn1       | -2.08 |
| 4875 | Snap91     | -2.08 |
| 4876 | Zbtb16     | -2.08 |
| 4877 | Tusc5      | -2.08 |
| 4878 | Glis2      | -2.08 |
| 4879 | Ccl11      | -2.08 |
| 4880 | Thra       | -2.08 |
| 4881 | Rnd2       | -2.08 |
| 4882 | Prrx1      | -2.08 |
| 4883 | RGD1306772 | -2.08 |
| 4884 | Vps41      | -2.08 |
| 4885 | Ogn        | -2.08 |
| 4886 | Ogn        | -2.08 |
| 4887 | Ii34       | -2.08 |
| 4888 | Scn9a      | -2.09 |
| 4889 | Gstm1      | -2.09 |
| 4890 | Nr2f1      | -2.09 |
| 4891 | Fam180a    | -2.09 |
| 4892 | Scg2       | -2.09 |
| 4893 | Maoa       | -2.09 |
| 4894 | Ttc3       | -2.09 |
| 4895 | Tmem98     | -2.09 |
| 4896 | Adck3      | -2.09 |
| 4897 | Mcpt111    | -2.09 |
| 4898 | Snrpn      | -2.1  |
| 4899 | Cdk2ap2    | -2.1  |
| 4900 | Slc18a2    | -2.1  |
| 4901 | Stk39      | -2.1  |
| 4902 | Gstm6      | -2.1  |
| 4903 | Prex2      | -2.1  |

|      |            |       |
|------|------------|-------|
| 4904 | Rab3b      | -2.1  |
| 4905 | Tprkb      | -2.1  |
| 4906 | Cyb561     | -2.1  |
| 4907 | Pank3      | -2.1  |
| 4908 | Kif3a      | -2.1  |
| 4909 | Ankrd40    | -2.1  |
| 4910 | Fmo3       | -2.1  |
| 4911 | Susd4      | -2.1  |
| 4912 | Itgb1      | -2.1  |
| 4913 | Wdr92      | -2.1  |
| 4914 | Uchl1      | -2.1  |
| 4915 | Mcf2l      | -2.1  |
| 4916 | Colec12    | -2.1  |
| 4917 | LOC683897  | -2.11 |
| 4918 | Sbsn       | -2.11 |
| 4919 | Nr1h3      | -2.11 |
| 4920 | Aif1l      | -2.11 |
| 4921 | Prkacb     | -2.11 |
| 4922 | Ghr        | -2.11 |
| 4923 | Dnajc6     | -2.11 |
| 4924 | Cd36       | -2.11 |
| 4925 | Sspn       | -2.11 |
| 4926 | Mybpc1     | -2.11 |
| 4927 | Pxdn       | -2.11 |
| 4928 | Gsta1      | -2.11 |
| 4929 | Bphl       | -2.11 |
| 4930 | Sirt5      | -2.11 |
| 4931 | Gpm6a      | -2.11 |
| 4932 | Prkaca     | -2.11 |
| 4933 | Kif5c      | -2.12 |
| 4934 | Golim4     | -2.12 |
| 4935 | Eif5a2     | -2.12 |
| 4936 | Cdkn2c     | -2.12 |
| 4937 | Pcyox1     | -2.12 |
| 4938 | Creb3l2    | -2.12 |
| 4939 | RGD1566243 | -2.12 |
| 4940 | Lyplal1    | -2.12 |
| 4941 | Ppp1r12b   | -2.12 |
| 4942 | Dcun1d4    | -2.12 |
| 4943 | Nrn1       | -2.12 |
| 4944 | Nol3       | -2.12 |

|      |           |       |
|------|-----------|-------|
| 4945 | C4a       | -2.13 |
| 4946 | Pi16      | -2.13 |
| 4947 | Hspa12a   | -2.13 |
| 4948 | Setd7     | -2.13 |
| 4949 | Cmb1      | -2.13 |
| 4950 | Postn     | -2.13 |
| 4951 | Ncald     | -2.13 |
| 4952 | L2hgdh    | -2.13 |
| 4953 | Gulp1     | -2.13 |
| 4954 | Lrrc49    | -2.13 |
| 4955 | Chrna3    | -2.13 |
| 4956 | Larp6     | -2.13 |
| 4957 | Sfrp4     | -2.13 |
| 4958 | Aktip     | -2.13 |
| 4959 | Mybpc2    | -2.14 |
| 4960 | Cyp2e1    | -2.14 |
| 4961 | Crabp2    | -2.14 |
| 4962 | Tprkb     | -2.14 |
| 4963 | Resp18    | -2.14 |
| 4964 | Chrdl1    | -2.14 |
| 4965 | Bhlhb9    | -2.14 |
| 4966 | Klhl4     | -2.14 |
| 4967 | Mpo       | -2.14 |
| 4968 | Cisd3     | -2.14 |
| 4969 | C4b       | -2.15 |
| 4970 | Fndc1     | -2.15 |
| 4971 | Scd       | -2.15 |
| 4972 | Sv2c      | -2.15 |
| 4973 | Tm4sf4    | -2.15 |
| 4974 | Nuak1     | -2.15 |
| 4975 | Hoxc8     | -2.15 |
| 4976 | Sec23a    | -2.15 |
| 4977 | Itgb5     | -2.15 |
| 4978 | Tmem50b   | -2.15 |
| 4979 | Cadps     | -2.15 |
| 4980 | MGC108823 | -2.15 |
| 4981 | Hace1     | -2.16 |
| 4982 | Pgm5      | -2.16 |
| 4983 | Apbb1     | -2.16 |
| 4984 | Olfml1    | -2.16 |
| 4985 | Acadsb    | -2.16 |

|      |              |       |
|------|--------------|-------|
| 4986 | Nnat         | -2.16 |
| 4987 | Hrh3         | -2.16 |
| 4988 | Reck         | -2.16 |
| 4989 | Fut8         | -2.16 |
| 4990 | Aldh6a1      | -2.16 |
| 4991 | Gpr116       | -2.16 |
| 4992 | Rcan2        | -2.16 |
| 4993 | Twsg1        | -2.16 |
| 4994 | Abhd14b      | -2.16 |
| 4995 | Ptrf         | -2.16 |
| 4996 | Cnrip1       | -2.16 |
| 4997 | Kif5b        | -2.16 |
| 4998 | Isoc1        | -2.16 |
| 4999 | Cyb5a        | -2.16 |
| 5000 | Cd24         | -2.17 |
| 5001 | B3gnt1       | -2.17 |
| 5002 | B3gnt1       | -2.17 |
| 5003 | Gsn          | -2.17 |
| 5004 | Pkia         | -2.17 |
| 5005 | Klf15        | -2.17 |
| 5006 | Vamp1        | -2.17 |
| 5007 | Apc2         | -2.17 |
| 5008 | Crip2        | -2.17 |
| 5009 | Rbp1         | -2.17 |
| 5010 | Itgb4        | -2.17 |
| 5011 | Srebf1       | -2.17 |
| 5012 | Mar-02       | -2.17 |
| 5013 | Stx2         | -2.17 |
| 5014 | Coprs        | -2.17 |
| 5015 | Fto          | -2.17 |
| 5016 | Susd2        | -2.18 |
| 5017 | Cdkn1c       | -2.18 |
| 5018 | Hspa12b      | -2.18 |
| 5019 | Chrm2        | -2.18 |
| 5020 | Fez1         | -2.18 |
| 5021 | MGC109340    | -2.18 |
| 5022 | Tmem35       | -2.18 |
| 5023 | Srebf1       | -2.18 |
| 5024 | LOC100366054 | -2.18 |
| 5025 | Fzd4         | -2.19 |

|      |            |       |
|------|------------|-------|
| 5026 | Nkain4     | -2.19 |
| 5027 | Wdsub1     | -2.19 |
| 5028 | Crot       | -2.19 |
| 5029 | Coq10a     | -2.19 |
| 5030 | Nefh       | -2.19 |
| 5031 | Mrpl49     | -2.2  |
| 5032 | Cdkn1c     | -2.2  |
| 5033 | Snurf      | -2.2  |
| 5034 | Dnajc10    | -2.2  |
| 5035 | Gcom1      | -2.2  |
| 5036 | Pfkfb1     | -2.2  |
| 5037 | Cypr1      | -2.2  |
| 5038 | Alcam      | -2.2  |
| 5039 | Mapt       | -2.2  |
| 5040 | RGD1310587 | -2.2  |
| 5041 | Spock1     | -2.2  |
| 5042 | Ndr4       | -2.2  |
| 5043 | Fgf1       | -2.2  |
| 5044 | Cdkn1c     | -2.21 |
| 5045 | Snurf      | -2.21 |
| 5046 | Nr2f2      | -2.21 |
| 5047 | Nnat       | -2.21 |
| 5048 | Chgb       | -2.21 |
| 5049 | Bdh2       | -2.21 |
| 5050 | Cidec      | -2.21 |
| 5051 | Scn2b      | -2.21 |
| 5052 | Acad11     | -2.21 |
| 5053 | RGD1306063 | -2.21 |
| 5054 | Arhgef40   | -2.21 |
| 5055 | Ndr4       | -2.21 |
| 5056 | Ndr4       | -2.21 |
| 5057 | Ddah2      | -2.22 |
| 5058 | Nnat       | -2.22 |
| 5059 | Pgm1       | -2.22 |
| 5060 | Cidec      | -2.22 |
| 5061 | Cidec      | -2.22 |
| 5062 | RGD1563325 | -2.22 |
| 5063 | Nfic       | -2.22 |
| 5064 | Sycp3      | -2.22 |
| 5065 | Sptssa     | -2.22 |
| 5066 | Pid1       | -2.22 |

|      |              |       |
|------|--------------|-------|
| 5067 | Epb41l3      | -2.22 |
| 5068 | Tmem255a     | -2.22 |
| 5069 | Sec14l1      | -2.22 |
| 5070 | Pbx1         | -2.22 |
| 5071 | Ndr4         | -2.22 |
| 5072 | Ndr4         | -2.22 |
| 5073 | Ccnd1        | -2.23 |
| 5074 | Nnat         | -2.23 |
| 5075 | Synpo2       | -2.23 |
| 5076 | Bche         | -2.23 |
| 5077 | Cpt2         | -2.23 |
| 5078 | Eapp         | -2.23 |
| 5079 | Meox2        | -2.23 |
| 5080 | At1          | -2.23 |
| 5081 | Ankrd23      | -2.23 |
| 5082 | Fasn         | -2.23 |
| 5083 | Ndr2         | -2.23 |
| 5084 | Ndr2         | -2.23 |
| 5085 | Ndr2         | -2.23 |
| 5086 | Ndr4         | -2.23 |
| 5087 | MGC108823    | -2.23 |
| 5088 | Ddah2        | -2.24 |
| 5089 | Olr63        | -2.24 |
| 5090 | Stmn2        | -2.24 |
| 5091 | C6           | -2.24 |
| 5092 | LOC100912292 | -2.24 |
| 5093 | Krt2         | -2.24 |
| 5094 | Sult4a1      | -2.24 |
| 5095 | MGC116197    | -2.24 |
| 5096 | Htr3a        | -2.24 |
| 5097 | Cadm3        | -2.24 |
| 5098 | Pbx1         | -2.24 |
| 5099 | Tmem120b     | -2.24 |
| 5100 | Ndr2         | -2.24 |
| 5101 | Prkg2        | -2.24 |
| 5102 | Hint3        | -2.25 |
| 5103 | Epb41l1      | -2.25 |
| 5104 | Oxtr         | -2.25 |
| 5105 | Dguok        | -2.25 |
| 5106 | Pfkfb1       | -2.25 |

|      |              |       |
|------|--------------|-------|
| 5107 | Arvcf        | -2.25 |
| 5108 | Eci1         | -2.25 |
| 5109 | Rgs5         | -2.25 |
| 5110 | Pgam2        | -2.25 |
| 5111 | Acot13       | -2.25 |
| 5112 | Epb4111      | -2.26 |
| 5113 | RGD1565616   | -2.26 |
| 5114 | Car3         | -2.26 |
| 5115 | Htr3b        | -2.26 |
| 5116 | Nek7         | -2.26 |
| 5117 | Dmtn         | -2.26 |
| 5118 | Dnm1         | -2.27 |
| 5119 | Map1a        | -2.27 |
| 5120 | Hmgcs1       | -2.27 |
| 5121 | Pdia4        | -2.27 |
| 5122 | Mgll         | -2.27 |
| 5123 | Avil         | -2.27 |
| 5124 | Tmem14a      | -2.27 |
| 5125 | Ctdspl       | -2.27 |
| 5126 | Pfkfb1       | -2.27 |
| 5127 | Atp1a2       | -2.27 |
| 5128 | Fmo1         | -2.27 |
| 5129 | Dpysl2       | -2.27 |
| 5130 | Cbr4         | -2.27 |
| 5131 | Scn1b        | -2.28 |
| 5132 | LOC100363112 | -2.28 |
| 5133 | Snap25       | -2.28 |
| 5134 | Palmd        | -2.28 |
| 5135 | Enpp2        | -2.28 |
| 5136 | Kank3        | -2.28 |
| 5137 | Tmod2        | -2.28 |
| 5138 | Atp1b1       | -2.28 |
| 5139 | Shisa3       | -2.28 |
| 5140 | Rit2         | -2.28 |
| 5141 | Scn1b        | -2.29 |
| 5142 | Prkra        | -2.29 |
| 5143 | Ncs1         | -2.29 |
| 5144 | Pfkm         | -2.29 |
| 5145 | Phyh         | -2.29 |
| 5146 | Scn1b        | -2.3  |



|      |         |       |
|------|---------|-------|
| 5147 | Bmyc    | -2.3  |
| 5148 | Snap25  | -2.3  |
| 5149 | Snap25  | -2.3  |
| 5150 | Lifr    | -2.3  |
| 5151 | Kif1b   | -2.3  |
| 5152 | Col14a1 | -2.3  |
| 5153 | Rab6b   | -2.3  |
| 5154 | Tagln3  | -2.3  |
| 5155 | Gnao1   | -2.3  |
| 5156 | Calhm2  | -2.31 |
| 5157 | Atl3    | -2.31 |
| 5158 | Il33    | -2.31 |
| 5159 | Tek     | -2.31 |
| 5160 | Arhgef9 | -2.31 |
| 5161 | Gkap1   | -2.31 |
| 5162 | Sorbs2  | -2.31 |
| 5163 | Zc2hc1a | -2.32 |
| 5164 | Tie1    | -2.32 |
| 5165 | Cxcl12  | -2.32 |
| 5166 | Tspan8  | -2.32 |
| 5167 | Lancl1  | -2.32 |
| 5168 | Pcp4    | -2.32 |
| 5169 | Wnt5a   | -2.32 |
| 5170 | Rbfox2  | -2.33 |
| 5171 | Ngfr    | -2.33 |
| 5172 | Sep-08  | -2.33 |
| 5173 | Akr1e2  | -2.33 |
| 5174 | Cyp2t1  | -2.34 |
| 5175 | Gstm3   | -2.34 |
| 5176 | Tmem218 | -2.34 |
| 5177 | Tagln3  | -2.34 |
| 5178 | Phlda3  | -2.34 |
| 5179 | Eci3    | -2.34 |
| 5180 | Tppp3   | -2.34 |
| 5181 | Uap1l1  | -2.35 |
| 5182 | Pkhd1l1 | -2.35 |
| 5183 | Pcp4    | -2.35 |
| 5184 | Gap43   | -2.35 |
| 5185 | Mar-01  | -2.35 |
| 5186 | Ces1d   | -2.35 |
| 5187 | Hint3   | -2.36 |

|      |            |       |
|------|------------|-------|
| 5188 | Chpt1      | -2.36 |
| 5189 | Cgnl1      | -2.36 |
| 5190 | Fgfr1      | -2.36 |
| 5191 | Scn7a      | -2.37 |
| 5192 | Fcrl2      | -2.37 |
| 5193 | Fxyd2      | -2.37 |
| 5194 | Gpx3       | -2.37 |
| 5195 | Pxmp2      | -2.37 |
| 5196 | LOC291863  | -2.37 |
| 5197 | Sep-10     | -2.38 |
| 5198 | Clip3      | -2.38 |
| 5199 | Clip3      | -2.38 |
| 5200 | Apba1      | -2.38 |
| 5201 | Tmem176b   | -2.38 |
| 5202 | Tmem176b   | -2.38 |
| 5203 | Tmem176b   | -2.38 |
| 5204 | Rnase4     | -2.38 |
| 5205 | Tmem55a    | -2.39 |
| 5206 | Tmem176b   | -2.39 |
| 5207 | Tmem176b   | -2.39 |
| 5208 | Reep1      | -2.39 |
| 5209 | Pecr       | -2.39 |
| 5210 | Fxyd2      | -2.39 |
| 5211 | Syt4       | -2.39 |
| 5212 | Lxn        | -2.4  |
| 5213 | Gja5       | -2.4  |
| 5214 | RGD1309821 | -2.4  |
| 5215 | Ebf2       | -2.4  |
| 5216 | RGD1309730 | -2.41 |
| 5217 | Tmem176b   | -2.41 |
| 5218 | Tmem176b   | -2.41 |
| 5219 | Ramp2      | -2.41 |
| 5220 | Ttl        | -2.42 |
| 5221 | Lrrc17     | -2.42 |
| 5222 | Ntn4       | -2.42 |
| 5223 | Ccdc80     | -2.42 |
| 5224 | Nat8l      | -2.42 |
| 5225 | Sult1a1    | -2.43 |
| 5226 | Parva      | -2.43 |
| 5227 | Igf1       | -2.43 |
| 5228 | Igf1       | -2.43 |

|      |         |       |
|------|---------|-------|
| 5229 | Islr    | -2.43 |
| 5230 | Chrna7  | -2.44 |
| 5231 | Sox18   | -2.44 |
| 5232 | Cbx6    | -2.44 |
| 5233 | Palm    | -2.44 |
| 5234 | Slc36a2 | -2.44 |
| 5235 | Rufy3   | -2.44 |
| 5236 | Cxcl12  | -2.45 |
| 5237 | Nfix    | -2.45 |
| 5238 | Nox4    | -2.46 |
| 5239 | Antxr1  | -2.46 |
| 5240 | Spock2  | -2.47 |
| 5241 | Tef     | -2.47 |
| 5242 | Map2    | -2.47 |
| 5243 | Aox3    | -2.47 |
| 5244 | Ntn1    | -2.47 |
| 5245 | Eef1a2  | -2.48 |
| 5246 | Igf1    | -2.48 |
| 5247 | Igf1    | -2.48 |
| 5248 | Rgs4    | -2.48 |
| 5249 | Atp2b4  | -2.48 |
| 5250 | Calml3  | -2.48 |
| 5251 | Gpam    | -2.49 |
| 5252 | Gstm6l  | -2.49 |
| 5253 | Dhcr24  | -2.49 |
| 5254 | Dhrs3   | -2.49 |
| 5255 | Klhl7   | -2.49 |
| 5256 | Fam13a  | -2.5  |
| 5257 | Pirt    | -2.5  |
| 5258 | Slc22a3 | -2.51 |
| 5259 | Smim1   | -2.51 |
| 5260 | Inmt    | -2.51 |
| 5261 | Scrn1   | -2.51 |
| 5262 | Nefl    | -2.51 |
| 5263 | Tub     | -2.52 |
| 5264 | Adh1    | -2.52 |
| 5265 | Cd320   | -2.52 |
| 5266 | Myrip   | -2.52 |
| 5267 | Mtss1l  | -2.52 |
| 5268 | Zfp521  | -2.52 |
| 5269 | Capn5   | -2.53 |

|      |            |       |
|------|------------|-------|
| 5270 | Sord       | -2.53 |
| 5271 | Timp4      | -2.53 |
| 5272 | Sbsn       | -2.54 |
| 5273 | Edn3       | -2.54 |
| 5274 | Emcn       | -2.55 |
| 5275 | RGD1563072 | -2.55 |
| 5276 | RGD1563072 | -2.55 |
| 5277 | Hand1      | -2.55 |
| 5278 | Aldh3a1    | -2.55 |
| 5279 | Kifap3     | -2.55 |
| 5280 | Nfia       | -2.56 |
| 5281 | Evc        | -2.56 |
| 5282 | Syn2       | -2.57 |
| 5283 | Pparg      | -2.57 |
| 5284 | Pparg      | -2.57 |
| 5285 | Lpl        | -2.57 |
| 5286 | Ctnnal1    | -2.58 |
| 5287 | Caskin2    | -2.58 |
| 5288 | Syp        | -2.59 |
| 5289 | Sptbn1     | -2.59 |
| 5290 | Pygm       | -2.6  |
| 5291 | Rtn4r      | -2.6  |
| 5292 | Acsl1      | -2.6  |
| 5293 | Sepp1      | -2.61 |
| 5294 | Sepp1      | -2.61 |
| 5295 | Pparg      | -2.61 |
| 5296 | Nedd4      | -2.61 |
| 5297 | Ccdc8      | -2.63 |
| 5298 | Plscr4     | -2.63 |
| 5299 | Mis12      | -2.63 |
| 5300 | Angptl1    | -2.63 |
| 5301 | Cby1       | -2.64 |
| 5302 | Pnpla3     | -2.64 |
| 5303 | Cbr3       | -2.64 |
| 5304 | Abcd2      | -2.65 |
| 5305 | Ddr2       | -2.65 |
| 5306 | Fam198b    | -2.66 |
| 5307 | Rab3c      | -2.67 |
| 5308 | Agmo       | -2.67 |
| 5309 | Gpr81      | -2.67 |
| 5310 | Cox6a2     | -2.68 |

|      |            |       |
|------|------------|-------|
| 5311 | Plxnd1     | -2.69 |
| 5312 | Elavl2     | -2.7  |
| 5313 | Napb       | -2.71 |
| 5314 | Camk2n1    | -2.71 |
| 5315 | Gpd1l      | -2.71 |
| 5316 | Cma1       | -2.71 |
| 5317 | Kif5a      | -2.72 |
| 5318 | Nefm       | -2.72 |
| 5319 | Syt11      | -2.73 |
| 5320 | Cxcl12     | -2.73 |
| 5321 | PCOLCE2    | -2.75 |
| 5322 | Slc9a3r2   | -2.75 |
| 5323 | Gdf10      | -2.75 |
| 5324 | Cd248      | -2.76 |
| 5325 | Cd248      | -2.76 |
| 5326 | Cd248      | -2.76 |
| 5327 | Doc2b      | -2.76 |
| 5328 | Stk32a     | -2.76 |
| 5329 | Syn2       | -2.77 |
| 5330 | Ephx1      | -2.77 |
| 5331 | Ephx1      | -2.77 |
| 5332 | Ldb2       | -2.77 |
| 5333 | Nrp1       | -2.77 |
| 5334 | Arl4d      | -2.78 |
| 5335 | Hmgcs2     | -2.79 |
| 5336 | Idh1       | -2.79 |
| 5337 | Kank2      | -2.79 |
| 5338 | Cox6a2     | -2.8  |
| 5339 | Dkk2       | -2.81 |
| 5340 | Mrgprg     | -2.83 |
| 5341 | Fmo2       | -2.83 |
| 5342 | Lgals12    | -2.85 |
| 5343 | Calcrl     | -2.85 |
| 5344 | Scara5     | -2.86 |
| 5345 | Slc6a2     | -2.86 |
| 5346 | RGD1309362 | -2.86 |
| 5347 | Mx2        | -2.89 |
| 5348 | Syt1       | -2.9  |
| 5349 | Myoz1      | -2.9  |
| 5350 | Cplx2      | -2.91 |
| 5351 | Mir6321    | -2.93 |

|      |           |       |
|------|-----------|-------|
| 5352 | Slc27a6   | -2.95 |
| 5353 | Myh2      | -2.97 |
| 5354 | Dbp       | -2.98 |
| 5355 | Slco2b1   | -3    |
| 5356 | Eno3      | -3    |
| 5357 | Aldh1a3   | -3.01 |
| 5358 | Gucy1a3   | -3.02 |
| 5359 | Tril      | -3.02 |
| 5360 | Ahnak     | -3.08 |
| 5361 | Myh8      | -3.09 |
| 5362 | Dpysl3    | -3.11 |
| 5363 | Igfbp5    | -3.12 |
| 5364 | Sult1d1   | -3.16 |
| 5365 | Sdpr      | -3.23 |
| 5366 | Cd34      | -3.26 |
| 5367 | Myh1      | -3.27 |
| 5368 | Tnfsf10   | -3.28 |
| 5369 | Cd34      | -3.28 |
| 5370 | Wisp2     | -3.29 |
| 5371 | Casq1     | -3.3  |
| 5372 | Chp2      | -3.38 |
| 5373 | Mettl7a   | -3.43 |
| 5374 | Actn3     | -3.44 |
| 5375 | Fabp9     | -3.49 |
| 5376 | Calml4    | -3.5  |
| 5377 | Tnnt3     | -3.51 |
| 5378 | Tnnt3     | -3.51 |
| 5379 | Tnnt3     | -3.51 |
| 5380 | Tnnt3     | -3.51 |
| 5381 | Tnnt3     | -3.52 |
| 5382 | Tnnt3     | -3.52 |
| 5383 | Tnnt3     | -3.52 |
| 5384 | Tnnt3     | -3.52 |
| 5385 | Tnnt3     | -3.53 |
| 5386 | Tnnt3     | -3.53 |
| 5387 | Tnnt3     | -3.53 |
| 5388 | Tnnt3     | -3.53 |
| 5389 | Tnnt3     | -3.53 |
| 5390 | LOC259245 | -3.55 |
| 5391 | Mup5      | -3.57 |
| 5392 | LOC259244 | -3.57 |

|      |            |       |
|------|------------|-------|
| 5393 | RGD1566134 | -3.67 |
| 5394 | LOC298116  | -3.67 |
| 5395 | LOC259246  | -3.68 |
| 5396 | Obp3       | -3.73 |
| 5397 | Obp3       | -3.73 |
| 5398 | Obp3       | -3.74 |
| 5399 | Mup4       | -3.8  |
| 5400 | Rbp7       | -3.82 |
| 5401 | Mup4       | -3.85 |
| 5402 | Ckm        | -4    |
| 5403 | Mylpf      | -4.03 |
| 5404 | LOC298111  | -4.08 |
| 5405 | Atp2a1     | -4.11 |
| 5406 | Tnnc2      | -4.16 |
| 5407 | Pvalb      | -4.17 |
| 5408 | Myl1       | -4.23 |
| 5409 | Myl1       | -4.29 |
| 5410 | Myh4       | -4.36 |
| 5411 | Tnni2      | -4.45 |
| 5412 | Pck1       | -4.72 |

**SUPPLEMENTAL TABLE 3: HYPOXIA THROMBOTIC**

| <b>S.No.</b> | <b>Gene_symbol</b> | <b>Log fold change</b> |
|--------------|--------------------|------------------------|
| 1            | Il1r2              | 7.46                   |
| 2            | Mt1a               | 6.32                   |
| 3            | Mt2A               | 6.29                   |
| 4            | Trem1              | 6.04                   |
| 5            | Il6                | 6.03                   |
| 6            | Ccl2               | 6.02                   |
| 7            | S100a8             | 5.97                   |
| 8            | S100a9             | 5.9                    |
| 9            | Hp                 | 5.89                   |
| 10           | Cxcl2              | 5.87                   |
| 11           | Ptx3               | 5.85                   |
| 12           | Slpil2             | 5.81                   |
| 13           | Pglyrp1            | 5.7                    |
| 14           | Osm                | 5.68                   |
| 15           | Nos2               | 5.67                   |
| 16           | Slpi               | 5.56                   |
| 17           | Ccl7               | 5.55                   |
| 18           | Lilrb4             | 5.48                   |
| 19           | RGD1565374         | 5.17                   |
| 20           | Cxcl1              | 5.16                   |
| 21           | Trem1              | 5.04                   |
| 22           | Mir147             | 4.93                   |
| 23           | Il1b               | 4.91                   |
| 24           | Prok2              | 4.91                   |
| 25           | Gp1bb              | 4.88                   |
| 26           | Clec4e             | 4.79                   |
| 27           | Mir223             | 4.72                   |
| 28           | Prok2              | 4.69                   |
| 29           | MGC105649          | 4.64                   |
| 30           | Mmp8               | 4.63                   |
| 31           | Csf3               | 4.57                   |
| 32           | Hmox1              | 4.54                   |
| 33           | Tnfaip6            | 4.48                   |
| 34           | Spp1               | 4.47                   |
| 35           | Slc16a3            | 4.46                   |
| 36           | Tfpi2              | 4.42                   |
| 37           | Csf3r              | 4.41                   |



|    |           |      |
|----|-----------|------|
| 38 | Gzmk      | 4.36 |
| 39 | Plaur     | 4.2  |
| 40 | Plaur     | 4.19 |
| 41 | Sphk1     | 4.14 |
| 42 | Cxcl3     | 4.14 |
| 43 | Serpine1  | 4.13 |
| 44 | Rnd1      | 4.12 |
| 45 | Samsn1    | 4.11 |
| 46 | Sphk1     | 4.11 |
| 47 | Ceacam10  | 4.1  |
| 48 | Ceacam10  | 4.1  |
| 49 | Sphk1     | 4.1  |
| 50 | Csrp3     | 4.08 |
| 51 | Gp9       | 4.07 |
| 52 | Has1      | 4.03 |
| 53 | Slpil3    | 4    |
| 54 | Sphk1     | 4    |
| 55 | Fcnb      | 3.99 |
| 56 | Socs3     | 3.98 |
| 57 | F2rl2     | 3.95 |
| 58 | Cxcr2     | 3.92 |
| 59 | Tlr2      | 3.91 |
| 60 | Sphk1     | 3.91 |
| 61 | Sphk1     | 3.91 |
| 62 | Napsa     | 3.9  |
| 63 | Serpinb1a | 3.9  |
| 64 | Clec7a    | 3.88 |
| 65 | Nfe2      | 3.88 |
| 66 | Mb        | 3.88 |
| 67 | LOC498276 | 3.85 |
| 68 | Camp      | 3.84 |
| 69 | Rgs1      | 3.84 |
| 70 | Alox5ap   | 3.84 |
| 71 | Cxcl5     | 3.82 |
| 72 | Pf4       | 3.81 |
| 73 | Alox12    | 3.8  |
| 74 | LOC498276 | 3.78 |
| 75 | Nrgn      | 3.77 |
| 76 | Tnfrsf12a | 3.77 |
| 77 | Cox6a2    | 3.75 |
| 78 | Cox6a2    | 3.75 |

|     |           |      |
|-----|-----------|------|
| 79  | Fcgr2a    | 3.75 |
| 80  | Ppbp      | 3.75 |
| 81  | Hspa1a    | 3.74 |
| 82  | Pla2g7    | 3.74 |
| 83  | Sell      | 3.71 |
| 84  | Fcar      | 3.7  |
| 85  | Trim63    | 3.69 |
| 86  | Fosl1     | 3.65 |
| 87  | Olr1      | 3.64 |
| 88  | Clec4d    | 3.63 |
| 89  | Phlda1    | 3.61 |
| 90  | Ccl17     | 3.58 |
| 91  | Clec1b    | 3.56 |
| 92  | Ly6g6f    | 3.54 |
| 93  | Cebpb     | 3.54 |
| 94  | Thbs1     | 3.52 |
| 95  | Ccl3      | 3.51 |
| 96  | Hspa1b    | 3.49 |
| 97  | Dusp2     | 3.49 |
| 98  | Timp1     | 3.46 |
| 99  | Plek      | 3.46 |
| 100 | Fgl2      | 3.45 |
| 101 | Elane     | 3.45 |
| 102 | Serpinb11 | 3.45 |
| 103 | Tnnc1     | 3.44 |
| 104 | Lilrb3    | 3.41 |
| 105 | Ccl5      | 3.41 |
| 106 | Tgm1      | 3.4  |
| 107 | Ankrd1    | 3.39 |
| 108 | Oas1k     | 3.38 |
| 109 | Hspa1l    | 3.36 |
| 110 | Adamts4   | 3.36 |
| 111 | Ch25h     | 3.31 |
| 112 | Rrad      | 3.31 |
| 113 | Tyrobp    | 3.29 |
| 114 | Clec4b2   | 3.29 |
| 115 | Sbno2     | 3.29 |
| 116 | Acta1     | 3.28 |
| 117 | Gadd45a   | 3.25 |
| 118 | Apold1    | 3.25 |
| 119 | Gzma      | 3.24 |

|     |            |      |
|-----|------------|------|
| 120 | Csf2rb     | 3.22 |
| 121 | Pvalb      | 3.21 |
| 122 | Mxd1       | 3.2  |
| 123 | Arid5a     | 3.2  |
| 124 | Ccl4       | 3.2  |
| 125 | Myoz1      | 3.2  |
| 126 | C5ar1      | 3.19 |
| 127 | Tnni2      | 3.19 |
| 128 | Trim54     | 3.19 |
| 129 | Pstpip1    | 3.19 |
| 130 | Ckm        | 3.18 |
| 131 | Junb       | 3.16 |
| 132 | Tnnc2      | 3.15 |
| 133 | Olfm4      | 3.15 |
| 134 | Bcl3       | 3.14 |
| 135 | Hspb1      | 3.14 |
| 136 | Nkg7       | 3.13 |
| 137 | RGD1564664 | 3.13 |
| 138 | Degs2      | 3.13 |
| 139 | Gp5        | 3.13 |
| 140 | Mmp9       | 3.12 |
| 141 | Chi3l1     | 3.12 |
| 142 | Ccr7       | 3.09 |
| 143 | Nfkbiz     | 3.08 |
| 144 | Fcgr2b     | 3.08 |
| 145 | Hk3        | 3.07 |
| 146 | Nfil3      | 3.06 |
| 147 | Myf6       | 3.04 |
| 148 | LOC691141  | 3.03 |
| 149 | Lst1       | 3.02 |
| 150 | Myh1       | 3.02 |
| 151 | Dusp5      | 3.01 |
| 152 | Tnnt3      | 2.99 |
| 153 | Il1rn      | 2.99 |
| 154 | Serpib10   | 2.99 |
| 155 | Tnnt3      | 2.98 |
| 156 | Tnnt3      | 2.98 |
| 157 | Tnnt3      | 2.98 |
| 158 | Tnnt3      | 2.98 |
| 159 | Tnnt3      | 2.98 |
| 160 | Myh2       | 2.98 |

|     |           |      |
|-----|-----------|------|
| 161 | Atp2a1    | 2.95 |
| 162 | Tnnt3     | 2.94 |
| 163 | Tnnt3     | 2.94 |
| 164 | Tnnt3     | 2.94 |
| 165 | Tnnt3     | 2.94 |
| 166 | Tnnt3     | 2.94 |
| 167 | Tnnt3     | 2.94 |
| 168 | Tnnt3     | 2.94 |
| 169 | Ncf4      | 2.93 |
| 170 | Dusp13    | 2.93 |
| 171 | Dusp13    | 2.93 |
| 172 | Atf3      | 2.92 |
| 173 | Klhl41    | 2.91 |
| 174 | Myl1      | 2.91 |
| 175 | Csrnp1    | 2.91 |
| 176 | Myh3      | 2.91 |
| 177 | Gadd45b   | 2.9  |
| 178 | Dok3      | 2.9  |
| 179 | Ccr1      | 2.88 |
| 180 | Nuak2     | 2.88 |
| 181 | Ltb4r     | 2.88 |
| 182 | Fetub     | 2.87 |
| 183 | Stx11     | 2.86 |
| 184 | Sod2      | 2.86 |
| 185 | Myl1      | 2.86 |
| 186 | Actn3     | 2.84 |
| 187 | Glrx      | 2.84 |
| 188 | Cd53      | 2.83 |
| 189 | Adm       | 2.82 |
| 190 | Serpina3n | 2.82 |
| 191 | Sat1      | 2.82 |
| 192 | Cd69      | 2.8  |
| 193 | Cebpd     | 2.8  |
| 194 | Smpx      | 2.79 |
| 195 | Ramp3     | 2.79 |
| 196 | Nlrp12    | 2.78 |
| 197 | Zfp36     | 2.78 |
| 198 | Pygm      | 2.78 |
| 199 | Sdc4      | 2.78 |
| 200 | Zc3h12a   | 2.78 |
| 201 | Gdf15     | 2.77 |

|     |           |      |
|-----|-----------|------|
| 202 | Ltb       | 2.76 |
| 203 | Ctrb1     | 2.76 |
| 204 | Sdcbp2    | 2.75 |
| 205 | Cdkn1a    | 2.74 |
| 206 | Ankrd2    | 2.74 |
| 207 | Litaf     | 2.74 |
| 208 | Selp      | 2.74 |
| 209 | Clec4a2   | 2.73 |
| 210 | Ifit3     | 2.71 |
| 211 | Pim1      | 2.7  |
| 212 | Jsrp1     | 2.7  |
| 213 | Fgr       | 2.69 |
| 214 | Ldb3      | 2.69 |
| 215 | Ldb3      | 2.69 |
| 216 | Spi1      | 2.68 |
| 217 | S1pr4     | 2.68 |
| 218 | Lyc2      | 2.68 |
| 219 | Ldb3      | 2.68 |
| 220 | Cryab     | 2.67 |
| 221 | Rpl3l     | 2.67 |
| 222 | Mir675    | 2.65 |
| 223 | Myc       | 2.65 |
| 224 | LOC299282 | 2.65 |
| 225 | Mir24-1   | 2.65 |
| 226 | Lyz2      | 2.64 |
| 227 | Selpg     | 2.64 |
| 228 | Egr2      | 2.63 |
| 229 | Mylpf     | 2.63 |
| 230 | Rbm38     | 2.63 |
| 231 | Tmod4     | 2.63 |
| 232 | Tmod4     | 2.63 |
| 233 | Tmod4     | 2.63 |
| 234 | Clec4f    | 2.63 |
| 235 | Adams1    | 2.63 |
| 236 | Tmod4     | 2.62 |
| 237 | Tmod4     | 2.62 |
| 238 | Arhgap25  | 2.62 |
| 239 | Slc11a1   | 2.62 |
| 240 | Gna15     | 2.61 |
| 241 | Cd300a    | 2.61 |
| 242 | Pgam2     | 2.61 |

|     |              |      |
|-----|--------------|------|
| 243 | Ugdh         | 2.61 |
| 244 | Ly6g6c       | 2.59 |
| 245 | Ngp          | 2.59 |
| 246 | Srgn         | 2.58 |
| 247 | Sema4a       | 2.58 |
| 248 | Eno3         | 2.58 |
| 249 | Gmpr         | 2.57 |
| 250 | Trim72       | 2.56 |
| 251 | Tnfrsf18     | 2.56 |
| 252 | Ankrd23      | 2.56 |
| 253 | Ncf2         | 2.56 |
| 254 | Rab20        | 2.56 |
| 255 | Lrg1         | 2.55 |
| 256 | Plk3         | 2.54 |
| 257 | P2ry13       | 2.53 |
| 258 | Emb          | 2.53 |
| 259 | Themis2      | 2.53 |
| 260 | Tacc3        | 2.53 |
| 261 | Hbb-b1       | 2.52 |
| 262 | Mylk2        | 2.51 |
| 263 | Mir21        | 2.51 |
| 264 | LOC305806    | 2.51 |
| 265 | PVR          | 2.5  |
| 266 | Chac1        | 2.5  |
| 267 | Smox         | 2.5  |
| 268 | LOC100134871 | 2.49 |
| 269 | LOC287167    | 2.49 |
| 270 | Gp1ba        | 2.49 |
| 271 | LOC689064    | 2.48 |
| 272 | Pacrg        | 2.48 |
| 273 | Sh2d2a       | 2.48 |
| 274 | Hbb          | 2.46 |
| 275 | Oscar        | 2.46 |
| 276 | Ckmt2        | 2.45 |
| 277 | Hbe1         | 2.44 |
| 278 | Cyp4f18      | 2.44 |
| 279 | Cd14         | 2.44 |
| 280 | Tnfrsf14     | 2.43 |
| 281 | Nr4a1        | 2.43 |
| 282 | Upp1         | 2.43 |
| 283 | Ier2         | 2.43 |

|     |          |      |
|-----|----------|------|
| 284 | Hba1     | 2.42 |
| 285 | Dhrs7c   | 2.42 |
| 286 | Tlr1     | 2.42 |
| 287 | Hamp     | 2.41 |
| 288 | Art1     | 2.41 |
| 289 | Ccl6     | 2.41 |
| 290 | Socs1    | 2.41 |
| 291 | Aqp9     | 2.4  |
| 292 | Tmem154  | 2.39 |
| 293 | Gpr4     | 2.38 |
| 294 | Cd2      | 2.38 |
| 295 | Slc2a1   | 2.37 |
| 296 | Muc20    | 2.37 |
| 297 | Casq1    | 2.37 |
| 298 | Mybpc2   | 2.36 |
| 299 | Wfdc15b  | 2.36 |
| 300 | Plin2    | 2.36 |
| 301 | Susd3    | 2.36 |
| 302 | Ptafr    | 2.34 |
| 303 | Hba2     | 2.34 |
| 304 | Dhrs7c   | 2.34 |
| 305 | Oas1d    | 2.34 |
| 306 | Oas1d    | 2.34 |
| 307 | Npy      | 2.33 |
| 308 | Myot     | 2.33 |
| 309 | Cxcr4    | 2.33 |
| 310 | Rhoh     | 2.33 |
| 311 | Myot     | 2.33 |
| 312 | Myot     | 2.33 |
| 313 | Tbc1d10c | 2.32 |
| 314 | H19      | 2.32 |
| 315 | Il4r     | 2.32 |
| 316 | Ampd1    | 2.32 |
| 317 | Abra     | 2.32 |
| 318 | Zfand2a  | 2.32 |
| 319 | Coro1a   | 2.31 |
| 320 | Hbegf    | 2.31 |
| 321 | Npy      | 2.3  |
| 322 | Arhgap9  | 2.3  |
| 323 | Snx20    | 2.3  |
| 324 | Rhov     | 2.29 |

|     |           |      |
|-----|-----------|------|
| 325 | Retnlg    | 2.29 |
| 326 | LOC685157 | 2.29 |
| 327 | Fermt3    | 2.28 |
| 328 | Ccnl1     | 2.28 |
| 329 | Dusp13    | 2.26 |
| 330 | Dusp13    | 2.26 |
| 331 | Ogfrl1    | 2.25 |
| 332 | Pla1a     | 2.25 |
| 333 | Crem      | 2.25 |
| 334 | Gmfg      | 2.24 |
| 335 | Birc3     | 2.24 |
| 336 | Il10      | 2.24 |
| 337 | Crem      | 2.24 |
| 338 | Alas2     | 2.23 |
| 339 | Cacng1    | 2.23 |
| 340 | Lcp1      | 2.23 |
| 341 | Mybpc1    | 2.22 |
| 342 | Crem      | 2.22 |
| 343 | Slc7a5    | 2.22 |
| 344 | Egr1      | 2.22 |
| 345 | Ier3      | 2.21 |
| 346 | Il17ra    | 2.21 |
| 347 | Acap1     | 2.21 |
| 348 | Fcer1g    | 2.21 |
| 349 | Myh4      | 2.2  |
| 350 | Fmn11     | 2.2  |
| 351 | Prg4      | 2.2  |
| 352 | Slc39a14  | 2.19 |
| 353 | Crem      | 2.19 |
| 354 | Klrb1b    | 2.18 |
| 355 | Cd52      | 2.17 |
| 356 | Il2rb     | 2.17 |
| 357 | Crem      | 2.17 |
| 358 | Crem      | 2.16 |
| 359 | Fosb      | 2.15 |
| 360 | Fbxo27    | 2.15 |
| 361 | Phospho1  | 2.15 |
| 362 | Actn2     | 2.15 |
| 363 | Glipr1    | 2.14 |
| 364 | Gldn      | 2.14 |
| 365 | Fitm1     | 2.14 |



|     |           |      |
|-----|-----------|------|
| 366 | G6b       | 2.13 |
| 367 | Lilrc2    | 2.13 |
| 368 | Gata1     | 2.13 |
| 369 | Gata1     | 2.13 |
| 370 | Sectm1b   | 2.13 |
| 371 | Spry1     | 2.12 |
| 372 | Arhgap9   | 2.12 |
| 373 | Hhatl     | 2.12 |
| 374 | Ier5      | 2.12 |
| 375 | Clec5a    | 2.11 |
| 376 | Stac3     | 2.11 |
| 377 | Mov10     | 2.1  |
| 378 | Rassf1    | 2.1  |
| 379 | Mir295-2  | 2.09 |
| 380 | Mir295-1  | 2.09 |
| 381 | Mir295-2  | 2.09 |
| 382 | Mir295-1  | 2.09 |
| 383 | Ifitm1    | 2.09 |
| 384 | Trib3     | 2.09 |
| 385 | LOC689574 | 2.09 |
| 386 | LOC689574 | 2.09 |
| 387 | Ebi3      | 2.09 |
| 388 | Cd3e      | 2.09 |
| 389 | Nrap      | 2.08 |
| 390 | Bin2      | 2.08 |
| 391 | H3f3b     | 2.07 |
| 392 | Btg2      | 2.07 |
| 393 | Patz1     | 2.07 |
| 394 | Fcgr1a    | 2.06 |
| 395 | Cd3d      | 2.06 |
| 396 | Srxn1     | 2.05 |
| 397 | Serinc2   | 2.05 |
| 398 | Tuba8     | 2.05 |
| 399 | Hmha1     | 2.05 |
| 400 | Nrap      | 2.04 |
| 401 | Prdx5     | 2.04 |
| 402 | Itgam     | 2.04 |
| 403 | Osgin1    | 2.04 |
| 404 | Lcn2      | 2.03 |
| 405 | Runx1     | 2.03 |
| 406 | Serpib2   | 2.03 |

|     |           |      |
|-----|-----------|------|
| 407 | Bst1      | 2.03 |
| 408 | Crem      | 2.03 |
| 409 | Dusp1     | 2.02 |
| 410 | Hpse      | 2.02 |
| 411 | Tmem156   | 2.02 |
| 412 | Tlr6      | 2.02 |
| 413 | Pdim1     | 2.01 |
| 414 | Mybph     | 2.01 |
| 415 | Mir3074   | 2.01 |
| 416 | Crem      | 2.01 |
| 417 | Bcar1     | 2.01 |
| 418 | Tnfrsf9   | 2    |
| 419 | Clec10a   | 2    |
| 420 | Hist1h2ba | 2    |
| 421 | Ctsw      | 1.99 |
| 422 | Cd27      | 1.99 |
| 423 | Mlf1      | 1.98 |
| 424 | Nkr-p1c   | 1.98 |
| 425 | Rac2      | 1.98 |
| 426 | Retnlb    | 1.98 |
| 427 | Ccrn4l    | 1.97 |
| 428 | Gk        | 1.97 |
| 429 | Sep-05    | 1.97 |
| 430 | Itgb2     | 1.96 |
| 431 | Lilrb3l   | 1.96 |
| 432 | Hspb7     | 1.96 |
| 433 | Ptprc     | 1.96 |
| 434 | Csf2ra    | 1.96 |
| 435 | Lat       | 1.95 |
| 436 | Actc1     | 1.95 |
| 437 | Gfi1b     | 1.95 |
| 438 | Ybx3      | 1.95 |
| 439 | Ptprc     | 1.95 |
| 440 | Ptprc     | 1.95 |
| 441 | Ptprc     | 1.95 |
| 442 | Gzmb      | 1.95 |
| 443 | Gpsm3     | 1.94 |
| 444 | Tax1bp1   | 1.94 |
| 445 | Fosl2     | 1.94 |
| 446 | Slfn3     | 1.94 |
| 447 | Ptprc     | 1.94 |

|     |          |      |
|-----|----------|------|
| 448 | Popdc3   | 1.93 |
| 449 | Fjx1     | 1.93 |
| 450 | Btg1     | 1.92 |
| 451 | Dennd1c  | 1.92 |
| 452 | Coq10b   | 1.92 |
| 453 | Plat     | 1.92 |
| 454 | Arhgap8  | 1.91 |
| 455 | Orai1    | 1.91 |
| 456 | Cd97     | 1.91 |
| 457 | Oas1h    | 1.9  |
| 458 | Rnf19b   | 1.89 |
| 459 | Sh3bgr   | 1.89 |
| 460 | Gfap     | 1.89 |
| 461 | Ass1     | 1.88 |
| 462 | Rbm3     | 1.88 |
| 463 | Myh8     | 1.88 |
| 464 | Akr1b8   | 1.87 |
| 465 | Cd8a     | 1.87 |
| 466 | Gpr132   | 1.87 |
| 467 | Tgif1    | 1.87 |
| 468 | Ppp1r15a | 1.86 |
| 469 | Xirp2    | 1.86 |
| 470 | Vcan     | 1.86 |
| 471 | Padi4    | 1.86 |
| 472 | Rn5-8s   | 1.86 |
| 473 | Cnr2     | 1.85 |
| 474 | Icam1    | 1.85 |
| 475 | Itk      | 1.85 |
| 476 | Lax1     | 1.85 |
| 477 | Odc1     | 1.84 |
| 478 | Ptpn18   | 1.84 |
| 479 | Oasl     | 1.84 |
| 480 | Hck      | 1.83 |
| 481 | Fosl2    | 1.83 |
| 482 | Batf     | 1.83 |
| 483 | Laptm5   | 1.82 |
| 484 | Runx3    | 1.82 |
| 485 | Ets2     | 1.82 |
| 486 | Cacna1s  | 1.82 |
| 487 | Ncr1     | 1.81 |
| 488 | Clcf1    | 1.81 |

|     |            |      |
|-----|------------|------|
| 489 | Ngf        | 1.81 |
| 490 | Fam150b    | 1.81 |
| 491 | Slc40a1    | 1.81 |
| 492 | Rcl1       | 1.8  |
| 493 | Ptpn22     | 1.8  |
| 494 | RGD2301395 | 1.8  |
| 495 | Gprc5a     | 1.8  |
| 496 | Myh7       | 1.8  |
| 497 | Ptpn6      | 1.79 |
| 498 | Tnfsf9     | 1.79 |
| 499 | Cd3g       | 1.79 |
| 500 | Rrp9       | 1.79 |
| 501 | Ccl22      | 1.79 |
| 502 | Id1        | 1.78 |
| 503 | Apobec2    | 1.78 |
| 504 | LOC367975  | 1.78 |
| 505 | Ripk3      | 1.78 |
| 506 | Ptpn2      | 1.78 |
| 507 | Hcls1      | 1.77 |
| 508 | Myh6       | 1.77 |
| 509 | Ppif       | 1.77 |
| 510 | Itpkc      | 1.76 |
| 511 | Hfe2       | 1.76 |
| 512 | Pak1ip1    | 1.76 |
| 513 | Rtn4rl2    | 1.74 |
| 514 | Maff       | 1.74 |
| 515 | lfrd1      | 1.74 |
| 516 | Rassf1     | 1.74 |
| 517 | Rn5-8s     | 1.73 |
| 518 | Rn5-8s     | 1.73 |
| 519 | Cyr61      | 1.73 |
| 520 | Rn5-8s     | 1.73 |
| 521 | Rn5-8s     | 1.73 |
| 522 | LOC500300  | 1.73 |
| 523 | Rn5-8s     | 1.73 |
| 524 | LOC24906   | 1.73 |
| 525 | Rn5-8s     | 1.73 |
| 526 | Rrm2       | 1.71 |
| 527 | Tifa       | 1.7  |
| 528 | Myd88      | 1.7  |
| 529 | Klhl40     | 1.7  |

|     |            |      |
|-----|------------|------|
| 530 | Rgs18      | 1.7  |
| 531 | Gch1       | 1.7  |
| 532 | R3hdm4     | 1.69 |
| 533 | Arrb2      | 1.69 |
| 534 | Adck4      | 1.68 |
| 535 | Cst7       | 1.68 |
| 536 | Ppan       | 1.68 |
| 537 | Kdm6b      | 1.68 |
| 538 | Rassf5     | 1.68 |
| 539 | Mir7a-1    | 1.68 |
| 540 | Zap70      | 1.67 |
| 541 | Spry2      | 1.67 |
| 542 | Fth1       | 1.66 |
| 543 | Vcan       | 1.66 |
| 544 | Tnc        | 1.66 |
| 545 | Tmc8       | 1.66 |
| 546 | Prkcq      | 1.66 |
| 547 | Cytip      | 1.65 |
| 548 | Gpr171     | 1.65 |
| 549 | Hist1h2ail | 1.65 |
| 550 | Ii21r      | 1.64 |
| 551 | Trpt1      | 1.64 |
| 552 | Hist1h2bk  | 1.64 |
| 553 | Ucp2       | 1.63 |
| 554 | Klrb1a     | 1.63 |
| 555 | Asb11      | 1.63 |
| 556 | Cd247      | 1.63 |
| 557 | Mss51      | 1.63 |
| 558 | Lsp1       | 1.62 |
| 559 | Bglap      | 1.62 |
| 560 | Mktn1      | 1.62 |
| 561 | Bcl2a1     | 1.62 |
| 562 | Cd247      | 1.62 |
| 563 | Hopx       | 1.62 |
| 564 | Fmo5       | 1.61 |
| 565 | Txnrd1     | 1.61 |
| 566 | Rhd        | 1.6  |
| 567 | Unc13d     | 1.6  |
| 568 | Rab24      | 1.6  |
| 569 | Sema4d     | 1.6  |
| 570 | Slc15a3    | 1.59 |

|     |            |      |
|-----|------------|------|
| 571 | Bcl2l1     | 1.59 |
| 572 | Steap4     | 1.59 |
| 573 | Trib1      | 1.59 |
| 574 | Hbz        | 1.59 |
| 575 | Mir24-2    | 1.59 |
| 576 | RT1-DMa    | 1.58 |
| 577 | RT1-DMa    | 1.58 |
| 578 | Zdhhc18    | 1.57 |
| 579 | Was        | 1.57 |
| 580 | Trat1      | 1.57 |
| 581 | Evi2a      | 1.57 |
| 582 | Dnajb1     | 1.57 |
| 583 | Hist2h4    | 1.56 |
| 584 | Nrtn       | 1.56 |
| 585 | Mefv       | 1.56 |
| 586 | Gadd45g    | 1.56 |
| 587 | RGD1306058 | 1.56 |
| 588 | Myom2      | 1.56 |
| 589 | Atf4       | 1.55 |
| 590 | Nfkbia     | 1.55 |
| 591 | Cd19       | 1.54 |
| 592 | Gzmm       | 1.54 |
| 593 | Fam43a     | 1.54 |
| 594 | Hist1h2bh  | 1.54 |
| 595 | Tubb6      | 1.54 |
| 596 | Zyx        | 1.53 |
| 597 | Tmem158    | 1.53 |
| 598 | Ptger2     | 1.53 |
| 599 | Hist1h2bo  | 1.53 |
| 600 | Tmem86b    | 1.52 |
| 601 | Sgms2      | 1.52 |
| 602 | Abtb1      | 1.52 |
| 603 | Klrd1      | 1.52 |
| 604 | Lgals2     | 1.52 |
| 605 | Nabp1      | 1.52 |
| 606 | Prf1       | 1.51 |
| 607 | F5         | 1.51 |
| 608 | Fes        | 1.5  |
| 609 | Snrpa      | 1.5  |
| 610 | Bpgm       | 1.5  |
| 611 | Parvg      | 1.5  |

|     |            |      |
|-----|------------|------|
| 612 | Serpina3c  | 1.5  |
| 613 | Map3k8     | 1.5  |
| 614 | Enpp3      | 1.49 |
| 615 | Mir29c     | 1.49 |
| 616 | Egfl7      | 1.49 |
| 617 | Mir29c     | 1.49 |
| 618 | Myo1g      | 1.49 |
| 619 | Sep-01     | 1.48 |
| 620 | Bcl2l1     | 1.48 |
| 621 | Epb42      | 1.48 |
| 622 | Neurl3     | 1.48 |
| 623 | Vps37b     | 1.48 |
| 624 | Cd83       | 1.48 |
| 625 | Haus8      | 1.48 |
| 626 | LOC652956  | 1.47 |
| 627 | LOC252890  | 1.47 |
| 628 | Exo5       | 1.47 |
| 629 | RGD1304595 | 1.47 |
| 630 | Nlrp3      | 1.47 |
| 631 | Stxbp2     | 1.47 |
| 632 | Ncf1       | 1.47 |
| 633 | Crlf2      | 1.47 |
| 634 | Ctu2       | 1.47 |
| 635 | Relt       | 1.46 |
| 636 | Arhgap15   | 1.46 |
| 637 | Sypl2      | 1.46 |
| 638 | Lcp2       | 1.46 |
| 639 | Lck        | 1.45 |
| 640 | Mgp        | 1.45 |
| 641 | Emp1       | 1.45 |
| 642 | Fos        | 1.45 |
| 643 | Il7r       | 1.44 |
| 644 | P2ry10     | 1.44 |
| 645 | Cd44       | 1.43 |
| 646 | Cdc25b     | 1.43 |
| 647 | Dapp1      | 1.43 |
| 648 | Tal1       | 1.43 |
| 649 | RGD1559482 | 1.43 |
| 650 | Ctla2a     | 1.43 |
| 651 | Taf1d      | 1.42 |
| 652 | RGD1561778 | 1.41 |

|     |           |      |
|-----|-----------|------|
| 653 | Evi2b     | 1.41 |
| 654 | Map4k1    | 1.4  |
| 655 | Adora2a   | 1.39 |
| 656 | Pkib      | 1.38 |
| 657 | Hist1h2bd | 1.38 |
| 658 | Gnl3      | 1.38 |
| 659 | Ifngr1    | 1.37 |
| 660 | Cd84      | 1.37 |
| 661 | Cxcl14    | 1.37 |
| 662 | Rara      | 1.36 |
| 663 | Uap1      | 1.36 |
| 664 | Hist1h2bl | 1.36 |
| 665 | Ddx39a    | 1.36 |
| 666 | Cbln2     | 1.36 |
| 667 | Pkib      | 1.35 |
| 668 | Car2      | 1.34 |
| 669 | Cav3      | 1.34 |
| 670 | Slc38a5   | 1.34 |
| 671 | Lgals5    | 1.34 |
| 672 | Noc4l     | 1.34 |
| 673 | Pkib      | 1.33 |
| 674 | Igsf6     | 1.33 |
| 675 | Trdn      | 1.32 |
| 676 | Actg1     | 1.32 |
| 677 | Trpv4     | 1.32 |
| 678 | Lmnb1     | 1.32 |
| 679 | Hspb6     | 1.31 |
| 680 | Bag3      | 1.31 |
| 681 | Vcan      | 1.31 |
| 682 | Ceacam1   | 1.3  |
| 683 | Gpr183    | 1.3  |
| 684 | Ldb3      | 1.3  |
| 685 | Riok3     | 1.3  |
| 686 | Smpdl3b   | 1.29 |
| 687 | Cited4    | 1.29 |
| 688 | Satb1     | 1.29 |
| 689 | Skap1     | 1.29 |
| 690 | Def6      | 1.28 |
| 691 | Ampd3     | 1.28 |
| 692 | Pdpn      | 1.28 |
| 693 | Wsb1      | 1.28 |



|     |         |      |
|-----|---------|------|
| 694 | Katnal1 | 1.28 |
| 695 | Fam65b  | 1.28 |
| 696 | Syk     | 1.28 |
| 697 | Hrc     | 1.27 |
| 698 | P2ry12  | 1.27 |
| 699 | Rasal3  | 1.27 |
| 700 | Rcan1   | 1.27 |
| 701 | Gas5    | 1.27 |
| 702 | Kcnab1  | 1.26 |
| 703 | Map3k6  | 1.26 |
| 704 | Zfp36l2 | 1.26 |
| 705 | Katnal1 | 1.26 |
| 706 | Ftl     | 1.25 |
| 707 | Ptges   | 1.25 |
| 708 | Gimap7  | 1.25 |
| 709 | Itgb7   | 1.25 |
| 710 | Zfp36l2 | 1.25 |
| 711 | Rhbdf2  | 1.25 |
| 712 | Aoah    | 1.25 |
| 713 | Ptprcap | 1.24 |
| 714 | Vav1    | 1.24 |
| 715 | Rhbdf2  | 1.24 |
| 716 | Fgd3    | 1.24 |
| 717 | Ceacam1 | 1.23 |
| 718 | Mboat7  | 1.23 |
| 719 | Mboat7  | 1.23 |
| 720 | Slc17a7 | 1.23 |
| 721 | B4galt5 | 1.23 |
| 722 | Gfpt2   | 1.23 |
| 723 | G0s2    | 1.23 |
| 724 | Fbxl5   | 1.23 |
| 725 | Cited2  | 1.22 |
| 726 | Procr   | 1.22 |
| 727 | Zfp593  | 1.22 |
| 728 | Stk17b  | 1.22 |
| 729 | Tmem38a | 1.22 |
| 730 | Ceacam1 | 1.21 |
| 731 | Tcf21   | 1.21 |
| 732 | Vcan    | 1.21 |
| 733 | Tmem71  | 1.21 |
| 734 | Chst11  | 1.21 |

|     |              |      |
|-----|--------------|------|
| 735 | Ctse         | 1.21 |
| 736 | Hsph1        | 1.21 |
| 737 | Nudt9        | 1.21 |
| 738 | Rgs19        | 1.2  |
| 739 | Gapdh-ps1    | 1.2  |
| 740 | H2afj        | 1.2  |
| 741 | H2afj        | 1.2  |
| 742 | Tuba4a       | 1.2  |
| 743 | Pdk3         | 1.2  |
| 744 | LOC100360619 | 1.2  |
| 745 | Mar-03       | 1.2  |
| 746 | Lpxn         | 1.19 |
| 747 | Ifit1        | 1.19 |
| 748 | Snai1        | 1.19 |
| 749 | Nop58        | 1.19 |
| 750 | RGD1563888   | 1.19 |
| 751 | Slc23a2      | 1.18 |
| 752 | Midn         | 1.18 |
| 753 | Ccl11        | 1.18 |
| 754 | Cd226        | 1.18 |
| 755 | Smap2        | 1.17 |
| 756 | Sla          | 1.17 |
| 757 | Inpp5d       | 1.17 |
| 758 | Cks2         | 1.17 |
| 759 | Tmem252      | 1.16 |
| 760 | Car4         | 1.15 |
| 761 | Wbscr22      | 1.15 |
| 762 | Hist1h2an    | 1.15 |
| 763 | Ldha         | 1.14 |
| 764 | Snx18        | 1.14 |
| 765 | Gapdh        | 1.14 |
| 766 | LOC303448    | 1.14 |
| 767 | Hist1h4b     | 1.14 |
| 768 | Ceacam1      | 1.13 |
| 769 | Fv1          | 1.13 |
| 770 | Hspa5        | 1.13 |
| 771 | RGD1563365   | 1.13 |
| 772 | Pdlim3       | 1.13 |
| 773 | Rasgrp4      | 1.12 |
| 774 | Ahsp         | 1.12 |
| 775 | Siah2        | 1.12 |

|     |            |      |
|-----|------------|------|
| 776 | Fln        | 1.12 |
| 777 | Irak2      | 1.12 |
| 778 | RGD1562136 | 1.12 |
| 779 | Rnf10      | 1.12 |
| 780 | Edn1       | 1.12 |
| 781 | Vasp       | 1.11 |
| 782 | Ubtd1      | 1.11 |
| 783 | Itga5      | 1.11 |
| 784 | Arl5c      | 1.11 |
| 785 | Lgals3     | 1.11 |
| 786 | Hmgb2      | 1.11 |
| 787 | Reg3g      | 1.1  |
| 788 | Myo1f      | 1.1  |
| 789 | Tspo       | 1.1  |
| 790 | Fam107b    | 1.1  |
| 791 | Lyl1       | 1.1  |
| 792 | Mir3556b   | 1.09 |
| 793 | Fbl        | 1.09 |
| 794 | Snrpa1     | 1.09 |
| 795 | Eif6       | 1.09 |
| 796 | Stk4       | 1.09 |
| 797 | Mir3556b   | 1.09 |
| 798 | Prkab1     | 1.09 |
| 799 | Isg20      | 1.08 |
| 800 | Gem        | 1.08 |
| 801 | Srm        | 1.08 |
| 802 | Trpc6      | 1.08 |
| 803 | Inhbb      | 1.08 |
| 804 | Tnip2      | 1.08 |
| 805 | Ninj1      | 1.08 |
| 806 | U2af1      | 1.07 |
| 807 | Srm        | 1.07 |
| 808 | Polr1e     | 1.07 |
| 809 | Pgf        | 1.07 |
| 810 | Bcl6       | 1.07 |
| 811 | Slc7a1     | 1.07 |
| 812 | Hmga1      | 1.06 |
| 813 | Sgk1       | 1.06 |
| 814 | Fyb        | 1.06 |
| 815 | Tpm3       | 1.06 |
| 816 | Yrdc       | 1.06 |

|     |          |      |
|-----|----------|------|
| 817 | Cyth4    | 1.06 |
| 818 | Srsf2    | 1.06 |
| 819 | Creg1    | 1.06 |
| 820 | Dck      | 1.06 |
| 821 | Sgk1     | 1.05 |
| 822 | Ptpn1    | 1.05 |
| 823 | Akna     | 1.05 |
| 824 | Cpne8    | 1.05 |
| 825 | Il1rap   | 1.05 |
| 826 | Clic1    | 1.04 |
| 827 | Sgk1     | 1.04 |
| 828 | Fpgs     | 1.04 |
| 829 | Ube2c    | 1.04 |
| 830 | Klri1    | 1.04 |
| 831 | Ptp4a3   | 1.04 |
| 832 | Baz1a    | 1.04 |
| 833 | Itgb1bp2 | 1.04 |
| 834 | Eif4a1   | 1.04 |
| 835 | Tmem2    | 1.03 |
| 836 | Jun      | 1.03 |
| 837 | Cdc34    | 1.03 |
| 838 | Esam     | 1.03 |
| 839 | Pinx1    | 1.03 |
| 840 | Prr7     | 1.03 |
| 841 | Diaph1   | 1.03 |
| 842 | Rasgrp2  | 1.02 |
| 843 | Pcna     | 1.02 |
| 844 | Gca      | 1.02 |
| 845 | Max      | 1.02 |
| 846 | Arhgap30 | 1.02 |
| 847 | Mafk     | 1.02 |
| 848 | Il18bp   | 1.01 |
| 849 | Thbd     | 1.01 |
| 850 | Kcnj8    | 1.01 |
| 851 | Plscr1   | 1.01 |
| 852 | Hyal2    | 1.01 |
| 853 | Il1rap   | 1.01 |
| 854 | Ldb3     | 1.01 |
| 855 | Stom     | 1    |
| 856 | Gar1     | 1    |
| 857 | Akr1b7   | 1    |

|     |           |    |
|-----|-----------|----|
| 858 | Bzw2      | 1  |
| 859 | Jmjd6     | 1  |
| 860 | Rgs16     | 1  |
| 861 | Nip7      | 1  |
| 862 | Lss       | -1 |
| 863 | Mettl10   | -1 |
| 864 | I7Rn6     | -1 |
| 865 | Fxyd1     | -1 |
| 866 | Pld3      | -1 |
| 867 | Apoe      | -1 |
| 868 | Wtap      | -1 |
| 869 | Wtap      | -1 |
| 870 | Irf2bp1   | -1 |
| 871 | Yif1b     | -1 |
| 872 | Bcat2     | -1 |
| 873 | Prkrir    | -1 |
| 874 | Coa4      | -1 |
| 875 | Ipo7      | -1 |
| 876 | Cd151     | -1 |
| 877 | Cd151     | -1 |
| 878 | Chchd5    | -1 |
| 879 | Ssna1     | -1 |
| 880 | Ehmt1     | -1 |
| 881 | Mtx2      | -1 |
| 882 | Arhgap1   | -1 |
| 883 | Zc3h8     | -1 |
| 884 | Rnf114    | -1 |
| 885 | Zmat3     | -1 |
| 886 | Lrrcc1    | -1 |
| 887 | Ncdn      | -1 |
| 888 | Pole3     | -1 |
| 889 | Ufl1      | -1 |
| 890 | Rnf20     | -1 |
| 891 | Ergic2    | -1 |
| 892 | Rassf4    | -1 |
| 893 | Ptd3      | -1 |
| 894 | Retsat    | -1 |
| 895 | Hdac10    | -1 |
| 896 | Alkbh7    | -1 |
| 897 | Ndufb3    | -1 |
| 898 | LOC367117 | -1 |

|     |            |       |
|-----|------------|-------|
| 899 | Prkcsb     | -1    |
| 900 | Crkl       | -1    |
| 901 | Dvl3       | -1    |
| 902 | Comt       | -1    |
| 903 | Dcxr       | -1    |
| 904 | Pigs       | -1    |
| 905 | Spns2      | -1    |
| 906 | RGD1309104 | -1    |
| 907 | Zfp238     | -1    |
| 908 | Cpne6      | -1    |
| 909 | Commd1     | -1    |
| 910 | Wrnip1     | -1    |
| 911 | Cmtr1      | -1.01 |
| 912 | Apoe       | -1.01 |
| 913 | Apoe       | -1.01 |
| 914 | Apoe       | -1.01 |
| 915 | Blvrb      | -1.01 |
| 916 | Ctsf       | -1.01 |
| 917 | Cdc37l1    | -1.01 |
| 918 | Stau1      | -1.01 |
| 919 | Stau1      | -1.01 |
| 920 | Manbal     | -1.01 |
| 921 | Usp20      | -1.01 |
| 922 | Tyro3      | -1.01 |
| 923 | Pigt       | -1.01 |
| 924 | Tpd52l2    | -1.01 |
| 925 | Rnpc3      | -1.01 |
| 926 | Fcho2      | -1.01 |
| 927 | Pusl1      | -1.01 |
| 928 | Mmp23      | -1.01 |
| 929 | Rb1cc1     | -1.01 |
| 930 | Lzic       | -1.01 |
| 931 | Pdzrn3     | -1.01 |
| 932 | St3gal5    | -1.01 |
| 933 | Rnf19a     | -1.01 |
| 934 | Dpy19l1    | -1.01 |
| 935 | Cep57      | -1.01 |
| 936 | Aasdhpt    | -1.01 |
| 937 | Ppp2r1b    | -1.01 |
| 938 | Elp6       | -1.01 |
| 939 | Sep-06     | -1.01 |

|     |            |       |
|-----|------------|-------|
| 940 | Ngfrap1    | -1.01 |
| 941 | Tmem101    | -1.01 |
| 942 | Mmgt2      | -1.01 |
| 943 | Slc30a1    | -1.01 |
| 944 | Wsb2       | -1.01 |
| 945 | Tm9sf1     | -1.01 |
| 946 | Supt16h    | -1.01 |
| 947 | Pnp        | -1.01 |
| 948 | Sncb       | -1.01 |
| 949 | Commd3     | -1.01 |
| 950 | Rab4a      | -1.01 |
| 951 | Fchsd1     | -1.01 |
| 952 | RGD1311805 | -1.01 |
| 953 | Tnxa-ps1   | -1.02 |
| 954 | Sec63      | -1.02 |
| 955 | Apoe       | -1.02 |
| 956 | RGD1305235 | -1.02 |
| 957 | Ngrn       | -1.02 |
| 958 | Serinc4    | -1.02 |
| 959 | Mal        | -1.02 |
| 960 | Skiv2l2    | -1.02 |
| 961 | Pex2       | -1.02 |
| 962 | RGD1564804 | -1.02 |
| 963 | Atp6v1h    | -1.02 |
| 964 | LOC500034  | -1.02 |
| 965 | Zdhhc3     | -1.02 |
| 966 | Tbc1d2b    | -1.02 |
| 967 | Apod       | -1.02 |
| 968 | Rnf2       | -1.02 |
| 969 | Zfp358     | -1.02 |
| 970 | Lrch1      | -1.02 |
| 971 | Zrsr1      | -1.02 |
| 972 | Armc6      | -1.02 |
| 973 | Apbb3      | -1.02 |
| 974 | Pdgfrb     | -1.02 |
| 975 | Lipa       | -1.03 |
| 976 | Coq7       | -1.03 |
| 977 | Dennd5a    | -1.03 |
| 978 | Myadm      | -1.03 |
| 979 | Xrcc1      | -1.03 |
| 980 | Cd81       | -1.03 |

|      |            |       |
|------|------------|-------|
| 981  | Zfp512b    | -1.03 |
| 982  | Nanp       | -1.03 |
| 983  | Tlk1       | -1.03 |
| 984  | Mapkap1    | -1.03 |
| 985  | Gnas       | -1.03 |
| 986  | Lphn2      | -1.03 |
| 987  | Lphn2      | -1.03 |
| 988  | Exosc9     | -1.03 |
| 989  | RGD1307100 | -1.03 |
| 990  | Fblim1     | -1.03 |
| 991  | Caap1      | -1.03 |
| 992  | Mrpl15     | -1.03 |
| 993  | Scmh1      | -1.03 |
| 994  | Emc1       | -1.03 |
| 995  | C1galt1    | -1.03 |
| 996  | Loxl3      | -1.03 |
| 997  | Zfyve20    | -1.03 |
| 998  | Il17re     | -1.03 |
| 999  | Fzd6       | -1.03 |
| 1000 | Dtd2       | -1.03 |
| 1001 | Mapre3     | -1.03 |
| 1002 | Pcbp4      | -1.03 |
| 1003 | Hsd17b10   | -1.03 |
| 1004 | RGD1565685 | -1.03 |
| 1005 | Scarf2     | -1.03 |
| 1006 | Rab40c     | -1.03 |
| 1007 | RGD1308139 | -1.03 |
| 1008 | Synrg      | -1.03 |
| 1009 | Mepce      | -1.03 |
| 1010 | Mepce      | -1.03 |
| 1011 | Dnajc15    | -1.03 |
| 1012 | Oxa1l      | -1.03 |
| 1013 | Stbd1      | -1.03 |
| 1014 | Klhl8      | -1.03 |
| 1015 | Nol3       | -1.03 |
| 1016 | Hk1        | -1.04 |
| 1017 | Ptov1      | -1.04 |
| 1018 | Ppp6r1     | -1.04 |
| 1019 | Tsen34     | -1.04 |
| 1020 | Tsen34     | -1.04 |
| 1021 | Aig1       | -1.04 |



|      |           |       |
|------|-----------|-------|
| 1022 | Trappc6a  | -1.04 |
| 1023 | Suv420h1  | -1.04 |
| 1024 | Lzts2     | -1.04 |
| 1025 | Aar2      | -1.04 |
| 1026 | Ddrgk1    | -1.04 |
| 1027 | Ehd4      | -1.04 |
| 1028 | Dbt       | -1.04 |
| 1029 | Fdps      | -1.04 |
| 1030 | Hltf      | -1.04 |
| 1031 | Tbl1xr1   | -1.04 |
| 1032 | Papss1    | -1.04 |
| 1033 | Sdhd      | -1.04 |
| 1034 | LOC497796 | -1.04 |
| 1035 | LOC497796 | -1.04 |
| 1036 | Slc6a6    | -1.04 |
| 1037 | Rabl2a    | -1.04 |
| 1038 | Frs2      | -1.04 |
| 1039 | Kifc2     | -1.04 |
| 1040 | Ano6      | -1.04 |
| 1041 | Tarbp2    | -1.04 |
| 1042 | Dync2li1  | -1.04 |
| 1043 | Ckb       | -1.04 |
| 1044 | Usp40     | -1.04 |
| 1045 | Klc4      | -1.04 |
| 1046 | Pnkd      | -1.04 |
| 1047 | Sdhd      | -1.04 |
| 1048 | Pts       | -1.04 |
| 1049 | Tyk2      | -1.04 |
| 1050 | Mtmr2     | -1.04 |
| 1051 | Dalrd3    | -1.04 |
| 1052 | Porcn     | -1.04 |
| 1053 | Tctex1d2  | -1.04 |
| 1054 | Osbpl11   | -1.04 |
| 1055 | Neurl4    | -1.04 |
| 1056 | Cd48      | -1.04 |
| 1057 | Zscan21   | -1.04 |
| 1058 | Cmtm5     | -1.04 |
| 1059 | Whsc1     | -1.04 |
| 1060 | Habp4     | -1.04 |
| 1061 | Hsbp1     | -1.04 |
| 1062 | Pard3     | -1.04 |

|      |          |       |
|------|----------|-------|
| 1063 | Gtf3c6   | -1.05 |
| 1064 | Gys1     | -1.05 |
| 1065 | Pstk     | -1.05 |
| 1066 | Ola1     | -1.05 |
| 1067 | Nmi      | -1.05 |
| 1068 | Cstf3    | -1.05 |
| 1069 | Arfgef2  | -1.05 |
| 1070 | Nelfcd   | -1.05 |
| 1071 | Zgpat    | -1.05 |
| 1072 | Zfr      | -1.05 |
| 1073 | Ubr4     | -1.05 |
| 1074 | Pex5     | -1.05 |
| 1075 | Pex5     | -1.05 |
| 1076 | Fam136a  | -1.05 |
| 1077 | Josd1    | -1.05 |
| 1078 | Arl1     | -1.05 |
| 1079 | Dctn2    | -1.05 |
| 1080 | Ltbp1    | -1.05 |
| 1081 | Cox7a2l  | -1.05 |
| 1082 | Rab12    | -1.05 |
| 1083 | Mterfd2  | -1.05 |
| 1084 | Gls      | -1.05 |
| 1085 | Sesn3    | -1.05 |
| 1086 | Ccdc12   | -1.05 |
| 1087 | Scarf1   | -1.05 |
| 1088 | Slc25a11 | -1.05 |
| 1089 | Bcas3    | -1.05 |
| 1090 | Rbbp5    | -1.05 |
| 1091 | Tmco1    | -1.05 |
| 1092 | Tmco1    | -1.05 |
| 1093 | Cog3     | -1.05 |
| 1094 | Pnma2    | -1.05 |
| 1095 | Ift88    | -1.05 |
| 1096 | Mbnl2    | -1.05 |
| 1097 | Hmgb3    | -1.05 |
| 1098 | Dgkq     | -1.05 |
| 1099 | Hmgb3    | -1.05 |
| 1100 | Gdf1     | -1.05 |
| 1101 | Dcun1d2  | -1.05 |
| 1102 | Egfl8    | -1.06 |
| 1103 | Plekhb1  | -1.06 |

|      |          |       |
|------|----------|-------|
| 1104 | Rcn3     | -1.06 |
| 1105 | Mrpl18   | -1.06 |
| 1106 | Zfp772   | -1.06 |
| 1107 | Fam3a    | -1.06 |
| 1108 | Coro1b   | -1.06 |
| 1109 | Jag1     | -1.06 |
| 1110 | Dpm2     | -1.06 |
| 1111 | Pmf1     | -1.06 |
| 1112 | Ndufs4   | -1.06 |
| 1113 | Dclk1    | -1.06 |
| 1114 | Acp6     | -1.06 |
| 1115 | Slc25a24 | -1.06 |
| 1116 | Pex14    | -1.06 |
| 1117 | Arfgef1  | -1.06 |
| 1118 | Nans     | -1.06 |
| 1119 | Ncaph2   | -1.06 |
| 1120 | Moap1    | -1.06 |
| 1121 | Pigh     | -1.06 |
| 1122 | Sdccag1  | -1.06 |
| 1123 | Cad      | -1.06 |
| 1124 | Fez2     | -1.06 |
| 1125 | Mrps9    | -1.06 |
| 1126 | Nlrx1    | -1.06 |
| 1127 | Elof1    | -1.06 |
| 1128 | Snupn    | -1.06 |
| 1129 | Zfx      | -1.06 |
| 1130 | Armxc3   | -1.06 |
| 1131 | Mien1    | -1.06 |
| 1132 | Blmh     | -1.06 |
| 1133 | Cnp      | -1.06 |
| 1134 | Nat9     | -1.06 |
| 1135 | Foxk2    | -1.06 |
| 1136 | Brox     | -1.06 |
| 1137 | Tada1    | -1.06 |
| 1138 | Copa     | -1.06 |
| 1139 | Lamtor4  | -1.06 |
| 1140 | Kctd9    | -1.06 |
| 1141 | Cgrrf1   | -1.06 |
| 1142 | Zc3h13   | -1.06 |
| 1143 | Ppp3r1   | -1.06 |
| 1144 | Lap3     | -1.06 |

|      |            |       |
|------|------------|-------|
| 1145 | Rsu1       | -1.06 |
| 1146 | Atp5c1     | -1.06 |
| 1147 | Lamp1      | -1.06 |
| 1148 | RGD1311847 | -1.06 |
| 1149 | Ctcf       | -1.06 |
| 1150 | LOC361346  | -1.06 |
| 1151 | Pcdhga9    | -1.06 |
| 1152 | Atp5a1     | -1.06 |
| 1153 | Scyl1      | -1.07 |
| 1154 | Gdi1       | -1.07 |
| 1155 | Mfge8      | -1.07 |
| 1156 | Mfge8      | -1.07 |
| 1157 | Bckdha     | -1.07 |
| 1158 | Pafah1b3   | -1.07 |
| 1159 | Atp5sl     | -1.07 |
| 1160 | Cep89      | -1.07 |
| 1161 | Bad        | -1.07 |
| 1162 | Bscl2      | -1.07 |
| 1163 | Pcsk1      | -1.07 |
| 1164 | Amacr      | -1.07 |
| 1165 | RGD1359508 | -1.07 |
| 1166 | Shc1       | -1.07 |
| 1167 | Ppcs       | -1.07 |
| 1168 | LOC246295  | -1.07 |
| 1169 | Amn1       | -1.07 |
| 1170 | Akap9      | -1.07 |
| 1171 | Iah1       | -1.07 |
| 1172 | Brcc3      | -1.07 |
| 1173 | Man2c1     | -1.07 |
| 1174 | Pdcd7      | -1.07 |
| 1175 | Anks3      | -1.07 |
| 1176 | Rimbp2     | -1.07 |
| 1177 | Hscb       | -1.07 |
| 1178 | Ngly1      | -1.07 |
| 1179 | Rwdd4      | -1.07 |
| 1180 | Nae1       | -1.07 |
| 1181 | RGD1308706 | -1.07 |
| 1182 | Afg3l1     | -1.07 |
| 1183 | Trappc8    | -1.07 |
| 1184 | Pcdhga8    | -1.07 |
| 1185 | Pcdhga11   | -1.07 |

|      |            |       |
|------|------------|-------|
| 1186 | Pcdhga12   | -1.07 |
| 1187 | Ndfip1     | -1.07 |
| 1188 | Hsf2       | -1.08 |
| 1189 | Hps1       | -1.08 |
| 1190 | Ctsd       | -1.08 |
| 1191 | Ctbp2      | -1.08 |
| 1192 | Ndufc2     | -1.08 |
| 1193 | mrpl11     | -1.08 |
| 1194 | Idh3B      | -1.08 |
| 1195 | Spg11      | -1.08 |
| 1196 | Blvra      | -1.08 |
| 1197 | Mrps27     | -1.08 |
| 1198 | Mfsd1      | -1.08 |
| 1199 | Scamp3     | -1.08 |
| 1200 | Casq2      | -1.08 |
| 1201 | Dhdds      | -1.08 |
| 1202 | Zfp362     | -1.08 |
| 1203 | Dmap1      | -1.08 |
| 1204 | Impad1     | -1.08 |
| 1205 | Eva1b      | -1.08 |
| 1206 | Calu       | -1.08 |
| 1207 | Dpy30      | -1.08 |
| 1208 | RGD1305089 | -1.08 |
| 1209 | Dnpep      | -1.08 |
| 1210 | Mlh1       | -1.08 |
| 1211 | Lppr2      | -1.08 |
| 1212 | Leo1       | -1.08 |
| 1213 | Lysmd2     | -1.08 |
| 1214 | Setd2      | -1.08 |
| 1215 | Slc2a4     | -1.08 |
| 1216 | Nagpa      | -1.08 |
| 1217 | Rai1       | -1.08 |
| 1218 | Pogk       | -1.08 |
| 1219 | Sbno1      | -1.08 |
| 1220 | Dhrs1      | -1.08 |
| 1221 | Polm       | -1.08 |
| 1222 | Impad1     | -1.08 |
| 1223 | Mon1b      | -1.08 |
| 1224 | Esco1      | -1.08 |
| 1225 | Matr3      | -1.08 |
| 1226 | Pcdhga1    | -1.08 |

|      |            |       |
|------|------------|-------|
| 1227 | Pcdhga7    | -1.08 |
| 1228 | Pcdhga5    | -1.08 |
| 1229 | Egfl8      | -1.09 |
| 1230 | Tbcb       | -1.09 |
| 1231 | Kcnk6      | -1.09 |
| 1232 | Kcnk6      | -1.09 |
| 1233 | LOC683722  | -1.09 |
| 1234 | Tbcb       | -1.09 |
| 1235 | Fibp       | -1.09 |
| 1236 | Ciao1      | -1.09 |
| 1237 | Tp53inp2   | -1.09 |
| 1238 | Nudt2      | -1.09 |
| 1239 | Kdm4c      | -1.09 |
| 1240 | Fggy       | -1.09 |
| 1241 | Ak2        | -1.09 |
| 1242 | Tada3      | -1.09 |
| 1243 | Snrnp27    | -1.09 |
| 1244 | Eif4b      | -1.09 |
| 1245 | Psen1      | -1.09 |
| 1246 | Dtymk      | -1.09 |
| 1247 | Zfp317     | -1.09 |
| 1248 | Ryk        | -1.09 |
| 1249 | Cul4b      | -1.09 |
| 1250 | LOC317456  | -1.09 |
| 1251 | Vasn       | -1.09 |
| 1252 | Snn        | -1.09 |
| 1253 | RGD1565784 | -1.09 |
| 1254 | Supt6h     | -1.09 |
| 1255 | Oasl2      | -1.09 |
| 1256 | Mcoln1     | -1.09 |
| 1257 | Msra       | -1.09 |
| 1258 | Kremen1    | -1.09 |
| 1259 | Atmin      | -1.09 |
| 1260 | Pcdhgb7    | -1.09 |
| 1261 | H2afy2     | -1.1  |
| 1262 | Tubb5      | -1.1  |
| 1263 | Pbx2       | -1.1  |
| 1264 | Eif3a      | -1.1  |
| 1265 | Fam204a    | -1.1  |
| 1266 | Mms19l     | -1.1  |
| 1267 | Sirt3      | -1.1  |

|      |            |      |
|------|------------|------|
| 1268 | Polr2i     | -1.1 |
| 1269 | Eml2       | -1.1 |
| 1270 | Polr2i     | -1.1 |
| 1271 | Dctn5      | -1.1 |
| 1272 | Nphp1      | -1.1 |
| 1273 | Stxbp3     | -1.1 |
| 1274 | Sclt1      | -1.1 |
| 1275 | Sigmar1    | -1.1 |
| 1276 | Topors     | -1.1 |
| 1277 | Ctnnbip1   | -1.1 |
| 1278 | Tmem65     | -1.1 |
| 1279 | Atp5b      | -1.1 |
| 1280 | Zhx2       | -1.1 |
| 1281 | Acot3      | -1.1 |
| 1282 | Sdc1       | -1.1 |
| 1283 | Spata7     | -1.1 |
| 1284 | Agap1      | -1.1 |
| 1285 | Rbm6       | -1.1 |
| 1286 | Siae       | -1.1 |
| 1287 | Prkag1     | -1.1 |
| 1288 | Sh3kbp1    | -1.1 |
| 1289 | Usp9x      | -1.1 |
| 1290 | Cggbp1     | -1.1 |
| 1291 | Icam2      | -1.1 |
| 1292 | Fxr2       | -1.1 |
| 1293 | Sep-09     | -1.1 |
| 1294 | Sep-09     | -1.1 |
| 1295 | Tsen15     | -1.1 |
| 1296 | RGD1564614 | -1.1 |
| 1297 | Arl8a      | -1.1 |
| 1298 | LOC680254  | -1.1 |
| 1299 | Tyw1       | -1.1 |
| 1300 | Pcp2       | -1.1 |
| 1301 | Anxa7      | -1.1 |
| 1302 | Smim20     | -1.1 |
| 1303 | Fam69a     | -1.1 |
| 1304 | Ankrd17    | -1.1 |
| 1305 | Wdr82      | -1.1 |
| 1306 | Rnf215     | -1.1 |
| 1307 | Acot13     | -1.1 |
| 1308 | Fbxo18     | -1.1 |

|      |            |       |
|------|------------|-------|
| 1309 | Abhd3      | -1.1  |
| 1310 | Pcdhga3    | -1.1  |
| 1311 | Pcdhgb8    | -1.1  |
| 1312 | Pcdhga10   | -1.1  |
| 1313 | Zfp523     | -1.11 |
| 1314 | Adcy2      | -1.11 |
| 1315 | Wnt11      | -1.11 |
| 1316 | Trpm7      | -1.11 |
| 1317 | Serping1   | -1.11 |
| 1318 | Usp53      | -1.11 |
| 1319 | Rsrc1      | -1.11 |
| 1320 | Erp44      | -1.11 |
| 1321 | RGD1559786 | -1.11 |
| 1322 | Cops7a     | -1.11 |
| 1323 | Ret        | -1.11 |
| 1324 | Nod1       | -1.11 |
| 1325 | Cdk2       | -1.11 |
| 1326 | Spast      | -1.11 |
| 1327 | Mpv17l     | -1.11 |
| 1328 | Rab31      | -1.11 |
| 1329 | Pgm3       | -1.11 |
| 1330 | Pls3       | -1.11 |
| 1331 | Mapk1      | -1.11 |
| 1332 | Zbtb11     | -1.11 |
| 1333 | Usp32      | -1.11 |
| 1334 | Abhd15     | -1.11 |
| 1335 | Mat2b      | -1.11 |
| 1336 | Abr        | -1.11 |
| 1337 | Tubg1      | -1.11 |
| 1338 | Pycr2      | -1.11 |
| 1339 | Parp2      | -1.11 |
| 1340 | Slain2     | -1.11 |
| 1341 | Grsf1      | -1.11 |
| 1342 | Fam120a    | -1.11 |
| 1343 | Ercc3      | -1.11 |
| 1344 | Pcdhga2    | -1.11 |
| 1345 | Tmem109    | -1.12 |
| 1346 | Ttc9c      | -1.12 |
| 1347 | Kdm2a      | -1.12 |
| 1348 | Hcfc1      | -1.12 |
| 1349 | Usp47      | -1.12 |



|      |            |       |
|------|------------|-------|
| 1350 | Kctd13     | -1.12 |
| 1351 | Srp14      | -1.12 |
| 1352 | Cacfd1     | -1.12 |
| 1353 | Lpcat4     | -1.12 |
| 1354 | Fpgt       | -1.12 |
| 1355 | Fabp4      | -1.12 |
| 1356 | Rnf13      | -1.12 |
| 1357 | Pigk       | -1.12 |
| 1358 | Vps13d     | -1.12 |
| 1359 | Nipsnap3b  | -1.12 |
| 1360 | Gpbp1l1    | -1.12 |
| 1361 | Csgalnact2 | -1.12 |
| 1362 | Tspan31    | -1.12 |
| 1363 | Msh2       | -1.12 |
| 1364 | Atp5s      | -1.12 |
| 1365 | Trappc4    | -1.12 |
| 1366 | Alg9       | -1.12 |
| 1367 | RGD1562618 | -1.12 |
| 1368 | Ctsh       | -1.12 |
| 1369 | Mageh1     | -1.12 |
| 1370 | Pcyt1a     | -1.12 |
| 1371 | Gtf2e1     | -1.12 |
| 1372 | Pigx       | -1.12 |
| 1373 | Psmc3ip    | -1.12 |
| 1374 | Fam86a     | -1.12 |
| 1375 | Vps25      | -1.12 |
| 1376 | Vamp4      | -1.12 |
| 1377 | Rab3gap2   | -1.12 |
| 1378 | Tpcn1      | -1.12 |
| 1379 | Oxsm       | -1.12 |
| 1380 | Lpar6      | -1.12 |
| 1381 | Rab5a      | -1.12 |
| 1382 | Fnta       | -1.12 |
| 1383 | Cc2d1a     | -1.12 |
| 1384 | Commd10    | -1.12 |
| 1385 | Adarb1     | -1.13 |
| 1386 | Rfk        | -1.13 |
| 1387 | Dhx32      | -1.13 |
| 1388 | Slc6a8     | -1.13 |
| 1389 | Ptpk       | -1.13 |
| 1390 | Lage3      | -1.13 |

|      |         |       |
|------|---------|-------|
| 1391 | Timm10b | -1.13 |
| 1392 | Tufm    | -1.13 |
| 1393 | Sox18   | -1.13 |
| 1394 | Cd93    | -1.13 |
| 1395 | Mavs    | -1.13 |
| 1396 | B4galt2 | -1.13 |
| 1397 | Tdrd7   | -1.13 |
| 1398 | Suclg2  | -1.13 |
| 1399 | Wasl    | -1.13 |
| 1400 | Calu    | -1.13 |
| 1401 | Mar-09  | -1.13 |
| 1402 | Mum1    | -1.13 |
| 1403 | Dpy30   | -1.13 |
| 1404 | Klf11   | -1.13 |
| 1405 | Arcn1   | -1.13 |
| 1406 | Hdac8   | -1.13 |
| 1407 | Dock11  | -1.13 |
| 1408 | Eif4a2  | -1.13 |
| 1409 | Poglut1 | -1.13 |
| 1410 | St6gal1 | -1.13 |
| 1411 | Ogfod3  | -1.13 |
| 1412 | Vamp2   | -1.13 |
| 1413 | Mfsd11  | -1.13 |
| 1414 | Pop5    | -1.13 |
| 1415 | Mrps17  | -1.13 |
| 1416 | Jph4    | -1.13 |
| 1417 | Rnf4    | -1.13 |
| 1418 | Irf2    | -1.13 |
| 1419 | Sugp2   | -1.13 |
| 1420 | Mlycd   | -1.13 |
| 1421 | Snx2    | -1.13 |
| 1422 | Adarb1  | -1.14 |
| 1423 | Adarb1  | -1.14 |
| 1424 | Adarb1  | -1.14 |
| 1425 | Tmem138 | -1.14 |
| 1426 | Oat     | -1.14 |
| 1427 | Gde1    | -1.14 |
| 1428 | Lmo1    | -1.14 |
| 1429 | Sptbn2  | -1.14 |
| 1430 | Nfs1    | -1.14 |
| 1431 | Psm5    | -1.14 |

|      |           |       |
|------|-----------|-------|
| 1432 | Odf2      | -1.14 |
| 1433 | Nfs1      | -1.14 |
| 1434 | Agtrap    | -1.14 |
| 1435 | St3gal3   | -1.14 |
| 1436 | Ptbp3     | -1.14 |
| 1437 | Lepre1    | -1.14 |
| 1438 | Cops7a    | -1.14 |
| 1439 | Atp6v1e1  | -1.14 |
| 1440 | Prickle1  | -1.14 |
| 1441 | Cpsf1     | -1.14 |
| 1442 | Nup37     | -1.14 |
| 1443 | Dcaf5     | -1.14 |
| 1444 | Ppp1r21   | -1.14 |
| 1445 | Acyp1     | -1.14 |
| 1446 | Ppil3     | -1.14 |
| 1447 | Ing5      | -1.14 |
| 1448 | Ldlr      | -1.14 |
| 1449 | Spink8    | -1.14 |
| 1450 | Pdzd11    | -1.14 |
| 1451 | Prdx4     | -1.14 |
| 1452 | Msn       | -1.14 |
| 1453 | Pvrl3     | -1.14 |
| 1454 | Tmem45a   | -1.14 |
| 1455 | Dirc2     | -1.14 |
| 1456 | Gnptg     | -1.14 |
| 1457 | Mlst8     | -1.14 |
| 1458 | Nmral1    | -1.14 |
| 1459 | Tbx2      | -1.14 |
| 1460 | Tpr       | -1.14 |
| 1461 | Abhd4     | -1.14 |
| 1462 | Mphosph8  | -1.14 |
| 1463 | Zfp644    | -1.14 |
| 1464 | Serpinb9  | -1.14 |
| 1465 | Flna      | -1.15 |
| 1466 | Rrm1      | -1.15 |
| 1467 | Gtpbp5    | -1.15 |
| 1468 | Hmox2-ps1 | -1.15 |
| 1469 | Armc1     | -1.15 |
| 1470 | Card6     | -1.15 |
| 1471 | Serinc5   | -1.15 |
| 1472 | Fam173b   | -1.15 |

|      |            |       |
|------|------------|-------|
| 1473 | Sucnr1     | -1.15 |
| 1474 | Abca1      | -1.15 |
| 1475 | Pcmd1      | -1.15 |
| 1476 | Faf1       | -1.15 |
| 1477 | Tspan11    | -1.15 |
| 1478 | Leprel2    | -1.15 |
| 1479 | Agap3      | -1.15 |
| 1480 | Rapgef3    | -1.15 |
| 1481 | Cnot2      | -1.15 |
| 1482 | RGD1309808 | -1.15 |
| 1483 | Mpst       | -1.15 |
| 1484 | Copz1      | -1.15 |
| 1485 | Trappc6b   | -1.15 |
| 1486 | Acyp1      | -1.15 |
| 1487 | Thap4      | -1.15 |
| 1488 | Hdgfrp2    | -1.15 |
| 1489 | Nptn       | -1.15 |
| 1490 | Nono       | -1.15 |
| 1491 | Ormdl3     | -1.15 |
| 1492 | Pigq       | -1.15 |
| 1493 | Mrpl55     | -1.15 |
| 1494 | Cnih4      | -1.15 |
| 1495 | Gnpda2     | -1.15 |
| 1496 | Wdfy3      | -1.15 |
| 1497 | Slc2a9     | -1.15 |
| 1498 | Pitrm1     | -1.15 |
| 1499 | Plac9      | -1.15 |
| 1500 | Otud4      | -1.15 |
| 1501 | RGD1308601 | -1.15 |
| 1502 | Cuta       | -1.16 |
| 1503 | Ascc3      | -1.16 |
| 1504 | Tbc1d17    | -1.16 |
| 1505 | Dact2      | -1.16 |
| 1506 | Tfpi       | -1.16 |
| 1507 | Odf2       | -1.16 |
| 1508 | Tmem167b   | -1.16 |
| 1509 | Fam110b    | -1.16 |
| 1510 | Rmdn1      | -1.16 |
| 1511 | Slc44a1    | -1.16 |
| 1512 | Dffa       | -1.16 |
| 1513 | Zfp422     | -1.16 |

|      |           |       |
|------|-----------|-------|
| 1514 | Uba3      | -1.16 |
| 1515 | Ndufa9    | -1.16 |
| 1516 | Top1mt    | -1.16 |
| 1517 | Mfsd6     | -1.16 |
| 1518 | Nab1      | -1.16 |
| 1519 | Ankrd12   | -1.16 |
| 1520 | Rbm5      | -1.16 |
| 1521 | Zfp609    | -1.16 |
| 1522 | Vkorc111  | -1.16 |
| 1523 | Anapc13   | -1.16 |
| 1524 | Slu7      | -1.16 |
| 1525 | Smyd3     | -1.16 |
| 1526 | Fh        | -1.16 |
| 1527 | LOC317456 | -1.16 |
| 1528 | Nupl1     | -1.16 |
| 1529 | Chd8      | -1.16 |
| 1530 | Fhit      | -1.16 |
| 1531 | Rbpj      | -1.16 |
| 1532 | Paics     | -1.16 |
| 1533 | Polr2b    | -1.16 |
| 1534 | Lrrc8b    | -1.16 |
| 1535 | Elmo1     | -1.16 |
| 1536 | Gpr137b   | -1.16 |
| 1537 | Cmtm3     | -1.16 |
| 1538 | Gnpda1    | -1.16 |
| 1539 | Cuta      | -1.17 |
| 1540 | Pdxk      | -1.17 |
| 1541 | Zfp91     | -1.17 |
| 1542 | Stx1b     | -1.17 |
| 1543 | Qprt      | -1.17 |
| 1544 | Uvrag     | -1.17 |
| 1545 | Ap2a1     | -1.17 |
| 1546 | Lig1      | -1.17 |
| 1547 | Renbp     | -1.17 |
| 1548 | Nars2     | -1.17 |
| 1549 | Tacc2     | -1.17 |
| 1550 | Dtd1      | -1.17 |
| 1551 | Mecom     | -1.17 |
| 1552 | Rabif     | -1.17 |
| 1553 | Otud7b    | -1.17 |
| 1554 | Smim8     | -1.17 |

|      |            |       |
|------|------------|-------|
| 1555 | Meaf6      | -1.17 |
| 1556 | Grcc10     | -1.17 |
| 1557 | Eif4e3     | -1.17 |
| 1558 | Stk3       | -1.17 |
| 1559 | RGD1309808 | -1.17 |
| 1560 | Vipas39    | -1.17 |
| 1561 | Birc6      | -1.17 |
| 1562 | Fntb       | -1.17 |
| 1563 | Trip12     | -1.17 |
| 1564 | Med20      | -1.17 |
| 1565 | Grcc10     | -1.17 |
| 1566 | Stk16      | -1.17 |
| 1567 | Mrpl44     | -1.17 |
| 1568 | Zfp445     | -1.17 |
| 1569 | Lamb2      | -1.17 |
| 1570 | Limd1      | -1.17 |
| 1571 | Praf2      | -1.17 |
| 1572 | Tmem106a   | -1.17 |
| 1573 | Gna13      | -1.17 |
| 1574 | Klhl12     | -1.17 |
| 1575 | Rabif      | -1.17 |
| 1576 | Arhgef18   | -1.17 |
| 1577 | Fbxw8      | -1.17 |
| 1578 | Bmp1       | -1.17 |
| 1579 | Efs        | -1.17 |
| 1580 | Fam149b1   | -1.17 |
| 1581 | Ablim2     | -1.17 |
| 1582 | Tmem255b   | -1.17 |
| 1583 | Psap       | -1.18 |
| 1584 | Psap       | -1.18 |
| 1585 | LOC499331  | -1.18 |
| 1586 | Prkcdbp    | -1.18 |
| 1587 | Hirip3     | -1.18 |
| 1588 | Anapc2     | -1.18 |
| 1589 | Cybrd1     | -1.18 |
| 1590 | Ahcyl1     | -1.18 |
| 1591 | Shc1       | -1.18 |
| 1592 | Rnf115     | -1.18 |
| 1593 | Casp9      | -1.18 |
| 1594 | Nub1       | -1.18 |
| 1595 | Orc5       | -1.18 |

|      |            |       |
|------|------------|-------|
| 1596 | Zfp637     | -1.18 |
| 1597 | Tcf20      | -1.18 |
| 1598 | Cand1      | -1.18 |
| 1599 | Rbms2      | -1.18 |
| 1600 | Gsdmd      | -1.18 |
| 1601 | Ppp2r5e    | -1.18 |
| 1602 | Snx17      | -1.18 |
| 1603 | Kdelc1     | -1.18 |
| 1604 | Mrpl2      | -1.18 |
| 1605 | Acsl3      | -1.18 |
| 1606 | Trip4      | -1.18 |
| 1607 | RGD1309779 | -1.18 |
| 1608 | Eif2b5     | -1.18 |
| 1609 | Rnf168     | -1.18 |
| 1610 | Mylk       | -1.18 |
| 1611 | Pcgf2      | -1.18 |
| 1612 | Sh3bp5l    | -1.18 |
| 1613 | Tatdn3     | -1.18 |
| 1614 | Dusp23     | -1.18 |
| 1615 | Ncstn      | -1.18 |
| 1616 | Usp30      | -1.18 |
| 1617 | Ube3b      | -1.18 |
| 1618 | N6amt2     | -1.18 |
| 1619 | Etaa1      | -1.18 |
| 1620 | Nf2        | -1.18 |
| 1621 | Asb3       | -1.18 |
| 1622 | Dek        | -1.18 |
| 1623 | Slc25a46   | -1.18 |
| 1624 | Elp2       | -1.18 |
| 1625 | Itpr3      | -1.19 |
| 1626 | Psap       | -1.19 |
| 1627 | Psap       | -1.19 |
| 1628 | Mrgprg     | -1.19 |
| 1629 | Cpxm2      | -1.19 |
| 1630 | Aamdc      | -1.19 |
| 1631 | Prrg2      | -1.19 |
| 1632 | Pvrl2      | -1.19 |
| 1633 | Zmynd8     | -1.19 |
| 1634 | Commd7     | -1.19 |
| 1635 | Tm9sf4     | -1.19 |
| 1636 | Meis2      | -1.19 |

|      |          |       |
|------|----------|-------|
| 1637 | Slc39a13 | -1.19 |
| 1638 | Rabl6    | -1.19 |
| 1639 | Dtwd1    | -1.19 |
| 1640 | Usp8     | -1.19 |
| 1641 | Slc2a10  | -1.19 |
| 1642 | S100a1   | -1.19 |
| 1643 | Rapgef2  | -1.19 |
| 1644 | Anxa5    | -1.19 |
| 1645 | Mynn     | -1.19 |
| 1646 | Cetn3    | -1.19 |
| 1647 | Cetn3    | -1.19 |
| 1648 | Snx16    | -1.19 |
| 1649 | Smc4     | -1.19 |
| 1650 | Nbn      | -1.19 |
| 1651 | Cldn12   | -1.19 |
| 1652 | Cdk14    | -1.19 |
| 1653 | Mkln1    | -1.19 |
| 1654 | Hbp1     | -1.19 |
| 1655 | Map4k3   | -1.19 |
| 1656 | Gphn     | -1.19 |
| 1657 | Acyp1    | -1.19 |
| 1658 | Snx14    | -1.19 |
| 1659 | Pknox2   | -1.19 |
| 1660 | Pknox2   | -1.19 |
| 1661 | Thoc2    | -1.19 |
| 1662 | Tspan7   | -1.19 |
| 1663 | Cdk16    | -1.19 |
| 1664 | Ebp      | -1.19 |
| 1665 | Wdr44    | -1.19 |
| 1666 | Vps29    | -1.19 |
| 1667 | Fam107a  | -1.19 |
| 1668 | Cmah     | -1.19 |
| 1669 | Ly86     | -1.19 |
| 1670 | Btd      | -1.19 |
| 1671 | Ttc13    | -1.19 |
| 1672 | Smpd3    | -1.19 |
| 1673 | Coq9     | -1.19 |
| 1674 | Tsnax    | -1.19 |
| 1675 | Clic2    | -1.2  |
| 1676 | Tars2    | -1.2  |
| 1677 | Srek1    | -1.2  |



|      |              |       |
|------|--------------|-------|
| 1678 | Ankh         | -1.2  |
| 1679 | Dram2        | -1.2  |
| 1680 | Zmym6        | -1.2  |
| 1681 | Zfp955a      | -1.2  |
| 1682 | Lrrc14       | -1.2  |
| 1683 | H1f0         | -1.2  |
| 1684 | Rpe          | -1.2  |
| 1685 | Tcta         | -1.2  |
| 1686 | Mras         | -1.2  |
| 1687 | Ecsit        | -1.2  |
| 1688 | Med12        | -1.2  |
| 1689 | Tmem45a      | -1.2  |
| 1690 | Cdc42ep4     | -1.2  |
| 1691 | LOC100302372 | -1.2  |
| 1692 | LOC100302372 | -1.2  |
| 1693 | Atp6v0a2     | -1.2  |
| 1694 | Mad111       | -1.2  |
| 1695 | Dnase1l3     | -1.2  |
| 1696 | Zmiz1        | -1.2  |
| 1697 | Atp8b1       | -1.2  |
| 1698 | P4ha1        | -1.21 |
| 1699 | Foxo3        | -1.21 |
| 1700 | Kctd15       | -1.21 |
| 1701 | Slc12a7      | -1.21 |
| 1702 | Hddc2        | -1.21 |
| 1703 | Ttyh1        | -1.21 |
| 1704 | Tnrc6a       | -1.21 |
| 1705 | Fam178a      | -1.21 |
| 1706 | Fam73b       | -1.21 |
| 1707 | Bbs5         | -1.21 |
| 1708 | Hs2st1       | -1.21 |
| 1709 | Bola1        | -1.21 |
| 1710 | Sv2a         | -1.21 |
| 1711 | Ppp3ca       | -1.21 |
| 1712 | Vamp3        | -1.21 |
| 1713 | Stx12        | -1.21 |
| 1714 | Lym2         | -1.21 |
| 1715 | Paqr7        | -1.21 |
| 1716 | Luzp1        | -1.21 |
| 1717 | Os9          | -1.21 |
| 1718 | Mdm1         | -1.21 |

|      |            |       |
|------|------------|-------|
| 1719 | Ptdss1     | -1.21 |
| 1720 | Dlst       | -1.21 |
| 1721 | M6pr       | -1.21 |
| 1722 | St6galnac2 | -1.21 |
| 1723 | Pecam1     | -1.21 |
| 1724 | Nme3       | -1.21 |
| 1725 | Tubg2      | -1.21 |
| 1726 | Psen2      | -1.21 |
| 1727 | Pitpnm2    | -1.21 |
| 1728 | Txndc5     | -1.21 |
| 1729 | Fat1       | -1.21 |
| 1730 | Maf        | -1.21 |
| 1731 | Ptger1     | -1.21 |
| 1732 | Hsf4       | -1.21 |
| 1733 | Cmip       | -1.21 |
| 1734 | Taz        | -1.22 |
| 1735 | Mtrr       | -1.22 |
| 1736 | Prkd2      | -1.22 |
| 1737 | Kdelr1     | -1.22 |
| 1738 | Pak1       | -1.22 |
| 1739 | Map6       | -1.22 |
| 1740 | Sez6l2     | -1.22 |
| 1741 | Vldlr      | -1.22 |
| 1742 | Fitm2      | -1.22 |
| 1743 | Cry2       | -1.22 |
| 1744 | Brd3       | -1.22 |
| 1745 | Med22      | -1.22 |
| 1746 | Med22      | -1.22 |
| 1747 | Ergic3     | -1.22 |
| 1748 | Cryz       | -1.22 |
| 1749 | Pex10      | -1.22 |
| 1750 | Aplf       | -1.22 |
| 1751 | Podxl      | -1.22 |
| 1752 | Tmem209    | -1.22 |
| 1753 | Etnk1      | -1.22 |
| 1754 | Gamt       | -1.22 |
| 1755 | Ywhaq      | -1.22 |
| 1756 | Itgb1bp1   | -1.22 |
| 1757 | Heatr5b    | -1.22 |
| 1758 | Oxsr1      | -1.22 |
| 1759 | Dpp8       | -1.22 |

|      |           |       |
|------|-----------|-------|
| 1760 | Ccdc51    | -1.22 |
| 1761 | Gemin8    | -1.22 |
| 1762 | Ndufb4    | -1.22 |
| 1763 | Ppil2     | -1.22 |
| 1764 | Acsf2     | -1.22 |
| 1765 | Nde1      | -1.22 |
| 1766 | Stat5a    | -1.22 |
| 1767 | Bpnt1     | -1.22 |
| 1768 | Flt1      | -1.22 |
| 1769 | Esd       | -1.22 |
| 1770 | Esd       | -1.22 |
| 1771 | Ablim2    | -1.22 |
| 1772 | Akr1c14   | -1.22 |
| 1773 | Stard3nl  | -1.22 |
| 1774 | Slc35d2   | -1.22 |
| 1775 | Zfp612    | -1.22 |
| 1776 | Nacc1     | -1.22 |
| 1777 | Gab1      | -1.22 |
| 1778 | Cdk10     | -1.22 |
| 1779 | Cuta      | -1.23 |
| 1780 | Pcbp3     | -1.23 |
| 1781 | LOC690344 | -1.23 |
| 1782 | Zfp111    | -1.23 |
| 1783 | Zfp524    | -1.23 |
| 1784 | Lcmt1     | -1.23 |
| 1785 | Exoc6     | -1.23 |
| 1786 | Uqcc1     | -1.23 |
| 1787 | Rmdn3     | -1.23 |
| 1788 | Madd      | -1.23 |
| 1789 | Zer1      | -1.23 |
| 1790 | Trub2     | -1.23 |
| 1791 | Nelfb     | -1.23 |
| 1792 | Tti1      | -1.23 |
| 1793 | Cse1l     | -1.23 |
| 1794 | Ecm1      | -1.23 |
| 1795 | Bbs7      | -1.23 |
| 1796 | Scamp1    | -1.23 |
| 1797 | Rfx5      | -1.23 |
| 1798 | Ensa      | -1.23 |
| 1799 | Nras      | -1.23 |
| 1800 | Otud6b    | -1.23 |

|      |            |       |
|------|------------|-------|
| 1801 | Slc44a1    | -1.23 |
| 1802 | Adck2      | -1.23 |
| 1803 | Eif2ak3    | -1.23 |
| 1804 | Necap1     | -1.23 |
| 1805 | Mrpl51     | -1.23 |
| 1806 | Vezt       | -1.23 |
| 1807 | Bok        | -1.23 |
| 1808 | Thyn1      | -1.23 |
| 1809 | Snx19      | -1.23 |
| 1810 | Rcn2       | -1.23 |
| 1811 | Sec22a     | -1.23 |
| 1812 | Tmem107    | -1.23 |
| 1813 | Ralgps2    | -1.23 |
| 1814 | Tchp       | -1.23 |
| 1815 | RGD1311899 | -1.23 |
| 1816 | Gbas       | -1.23 |
| 1817 | Snx8       | -1.23 |
| 1818 | Ppp3cc     | -1.23 |
| 1819 | Esd        | -1.23 |
| 1820 | Pold2      | -1.23 |
| 1821 | Cxcl13     | -1.23 |
| 1822 | Cenpc      | -1.23 |
| 1823 | Usp46      | -1.23 |
| 1824 | Wfs1       | -1.23 |
| 1825 | Atp6v1b2   | -1.23 |
| 1826 | Plvap      | -1.23 |
| 1827 | Ednra      | -1.23 |
| 1828 | Cdk10      | -1.23 |
| 1829 | Zfp191     | -1.23 |
| 1830 | F8         | -1.23 |
| 1831 | Bex4       | -1.23 |
| 1832 | Inpp1      | -1.24 |
| 1833 | Snrnp70    | -1.24 |
| 1834 | Trpm4      | -1.24 |
| 1835 | Ttc23      | -1.24 |
| 1836 | Mkks       | -1.24 |
| 1837 | Ppp2r4     | -1.24 |
| 1838 | Mtch2      | -1.24 |
| 1839 | Bloc1s6    | -1.24 |
| 1840 | RGD1565059 | -1.24 |
| 1841 | Ube4b      | -1.24 |

|      |            |       |
|------|------------|-------|
| 1842 | Mrpl50     | -1.24 |
| 1843 | RGD1559904 | -1.24 |
| 1844 | Armc10     | -1.24 |
| 1845 | Cnpy2      | -1.24 |
| 1846 | Nov        | -1.24 |
| 1847 | Mief1      | -1.24 |
| 1848 | Dcaf4      | -1.24 |
| 1849 | Kcne4      | -1.24 |
| 1850 | Ptplad1    | -1.24 |
| 1851 | Amt        | -1.24 |
| 1852 | Cldn5      | -1.24 |
| 1853 | Atp1a4     | -1.24 |
| 1854 | Atp1a4     | -1.24 |
| 1855 | Srgap2     | -1.24 |
| 1856 | Rnf34      | -1.24 |
| 1857 | Rnf216     | -1.24 |
| 1858 | Slc7a7     | -1.24 |
| 1859 | Ccng2      | -1.24 |
| 1860 | Eci2       | -1.24 |
| 1861 | Dusp22     | -1.24 |
| 1862 | Ash2l      | -1.24 |
| 1863 | Cdk10      | -1.24 |
| 1864 | Psmb8      | -1.25 |
| 1865 | Btbd1      | -1.25 |
| 1866 | Brd9       | -1.25 |
| 1867 | Cadm4      | -1.25 |
| 1868 | Rab6a      | -1.25 |
| 1869 | Bckdk      | -1.25 |
| 1870 | Chd6       | -1.25 |
| 1871 | Duoxa1     | -1.25 |
| 1872 | Prpf40a    | -1.25 |
| 1873 | Tmem127    | -1.25 |
| 1874 | Hps3       | -1.25 |
| 1875 | Basp1      | -1.25 |
| 1876 | Dnajb14    | -1.25 |
| 1877 | Xpa        | -1.25 |
| 1878 | Coq3       | -1.25 |
| 1879 | Camk1      | -1.25 |
| 1880 | Xpot       | -1.25 |
| 1881 | Ptgr2      | -1.25 |
| 1882 | Dhx57      | -1.25 |

|      |            |       |
|------|------------|-------|
| 1883 | Papola     | -1.25 |
| 1884 | Aars2      | -1.25 |
| 1885 | Stt3b      | -1.25 |
| 1886 | Usp25      | -1.25 |
| 1887 | Smurf2     | -1.25 |
| 1888 | Lrrc45     | -1.25 |
| 1889 | Cfh        | -1.25 |
| 1890 | Lfng       | -1.25 |
| 1891 | Ctxn1      | -1.25 |
| 1892 | Tctn1      | -1.25 |
| 1893 | Micu2      | -1.25 |
| 1894 | Sod3       | -1.25 |
| 1895 | Usp6nl     | -1.25 |
| 1896 | Celf2      | -1.25 |
| 1897 | Optn       | -1.25 |
| 1898 | Vstm4      | -1.25 |
| 1899 | Fam65a     | -1.25 |
| 1900 | Atp9b      | -1.25 |
| 1901 | Zfp532     | -1.25 |
| 1902 | Atad1      | -1.26 |
| 1903 | Fam210b    | -1.26 |
| 1904 | Dhfr       | -1.26 |
| 1905 | Man1c1     | -1.26 |
| 1906 | RGD1359108 | -1.26 |
| 1907 | Slc35a1    | -1.26 |
| 1908 | Lypla1     | -1.26 |
| 1909 | RGD1310313 | -1.26 |
| 1910 | Tm7sf3     | -1.26 |
| 1911 | Clec1a     | -1.26 |
| 1912 | Mrpl13     | -1.26 |
| 1913 | Fam91a1    | -1.26 |
| 1914 | Fbln1      | -1.26 |
| 1915 | Seli       | -1.26 |
| 1916 | Hdlbp      | -1.26 |
| 1917 | Sp100      | -1.26 |
| 1918 | Sh3bp4     | -1.26 |
| 1919 | Bnip2      | -1.26 |
| 1920 | Stag1      | -1.26 |
| 1921 | Araf       | -1.26 |
| 1922 | Fgd1       | -1.26 |
| 1923 | Msl3       | -1.26 |

|      |          |       |
|------|----------|-------|
| 1924 | Taf1     | -1.26 |
| 1925 | Stat5b   | -1.26 |
| 1926 | Pafah1b1 | -1.26 |
| 1927 | Ifi35    | -1.26 |
| 1928 | Stx6     | -1.26 |
| 1929 | Top2b    | -1.26 |
| 1930 | Sparcl1  | -1.26 |
| 1931 | Agpat1   | -1.27 |
| 1932 | Gstt1    | -1.27 |
| 1933 | Wdr73    | -1.27 |
| 1934 | Pih1d1   | -1.27 |
| 1935 | Pde2a    | -1.27 |
| 1936 | Cdipt    | -1.27 |
| 1937 | Ctf1     | -1.27 |
| 1938 | Ric8a    | -1.27 |
| 1939 | Cdk5rap1 | -1.27 |
| 1940 | Tcp11l1  | -1.27 |
| 1941 | Fkbp7    | -1.27 |
| 1942 | Zbtb6    | -1.27 |
| 1943 | Lin7c    | -1.27 |
| 1944 | Plcb1    | -1.27 |
| 1945 | Pdim5    | -1.27 |
| 1946 | Kpna4    | -1.27 |
| 1947 | Ttc14    | -1.27 |
| 1948 | Tspan2   | -1.27 |
| 1949 | Zmym4    | -1.27 |
| 1950 | Kdm4a    | -1.27 |
| 1951 | Tmem168  | -1.27 |
| 1952 | Agk      | -1.27 |
| 1953 | Syng1    | -1.27 |
| 1954 | Laptm4a  | -1.27 |
| 1955 | Ndufa10  | -1.27 |
| 1956 | Mrpl30   | -1.27 |
| 1957 | Rnf26    | -1.27 |
| 1958 | Sin3a    | -1.27 |
| 1959 | Wdr48    | -1.27 |
| 1960 | Gm2a     | -1.27 |
| 1961 | Fam101b  | -1.27 |
| 1962 | Kdsr     | -1.27 |
| 1963 | Anapc5   | -1.27 |
| 1964 | Tmem55b  | -1.27 |

|      |         |       |
|------|---------|-------|
| 1965 | Comtd1  | -1.27 |
| 1966 | Prorsd1 | -1.27 |
| 1967 | Ccdc117 | -1.27 |
| 1968 | Htra3   | -1.27 |
| 1969 | Cpz     | -1.27 |
| 1970 | Tmem129 | -1.27 |
| 1971 | Prrt1   | -1.28 |
| 1972 | Ank3    | -1.28 |
| 1973 | Prdx3   | -1.28 |
| 1974 | Obfc1   | -1.28 |
| 1975 | Dcun1d3 | -1.28 |
| 1976 | Rps6ka2 | -1.28 |
| 1977 | Lix1    | -1.28 |
| 1978 | Pde2a   | -1.28 |
| 1979 | Pde2a   | -1.28 |
| 1980 | Clpb    | -1.28 |
| 1981 | Fibin   | -1.28 |
| 1982 | Morn5   | -1.28 |
| 1983 | Apoa1bp | -1.28 |
| 1984 | Gucy1b3 | -1.28 |
| 1985 | Rarres1 | -1.28 |
| 1986 | Mrps36  | -1.28 |
| 1987 | Fam151b | -1.28 |
| 1988 | Gfm2    | -1.28 |
| 1989 | Zfp691  | -1.28 |
| 1990 | Smim8   | -1.28 |
| 1991 | Hspb11  | -1.28 |
| 1992 | Ak2     | -1.28 |
| 1993 | Rap1gap | -1.28 |
| 1994 | Anxa4   | -1.28 |
| 1995 | Tst     | -1.28 |
| 1996 | Stat2   | -1.28 |
| 1997 | Efr3a   | -1.28 |
| 1998 | Atraid  | -1.28 |
| 1999 | Mrpl30  | -1.28 |
| 2000 | Olfm2   | -1.28 |
| 2001 | Fam214a | -1.28 |
| 2002 | Ctnnb1  | -1.28 |
| 2003 | Snap29  | -1.28 |
| 2004 | Rnf187  | -1.28 |
| 2005 | Rhot1   | -1.28 |



|      |            |       |
|------|------------|-------|
| 2006 | Gdpd1      | -1.28 |
| 2007 | RGD1565033 | -1.28 |
| 2008 | Gusb       | -1.28 |
| 2009 | Emc9       | -1.28 |
| 2010 | Nkiras1    | -1.28 |
| 2011 | Anapc4     | -1.28 |
| 2012 | Stim2      | -1.28 |
| 2013 | Celf2      | -1.28 |
| 2014 | Tusc3      | -1.28 |
| 2015 | Bag4       | -1.28 |
| 2016 | Actr1a     | -1.29 |
| 2017 | Ak3        | -1.29 |
| 2018 | Inpp1      | -1.29 |
| 2019 | Zfp180     | -1.29 |
| 2020 | Zfp180     | -1.29 |
| 2021 | Pgm2l1     | -1.29 |
| 2022 | Gbf1       | -1.29 |
| 2023 | Flrt3      | -1.29 |
| 2024 | Chst14     | -1.29 |
| 2025 | Polr3gl    | -1.29 |
| 2026 | Nln        | -1.29 |
| 2027 | Rab13      | -1.29 |
| 2028 | Gdap2      | -1.29 |
| 2029 | Thrap3     | -1.29 |
| 2030 | Urod       | -1.29 |
| 2031 | Tmem70     | -1.29 |
| 2032 | Galt       | -1.29 |
| 2033 | Cav2       | -1.29 |
| 2034 | C1r        | -1.29 |
| 2035 | Rpap3      | -1.29 |
| 2036 | Wdr60      | -1.29 |
| 2037 | Ccdc176    | -1.29 |
| 2038 | Jkamp      | -1.29 |
| 2039 | Stk25      | -1.29 |
| 2040 | Ctdsp1     | -1.29 |
| 2041 | Acat1      | -1.29 |
| 2042 | Cish       | -1.29 |
| 2043 | Mst1       | -1.29 |
| 2044 | Srpx       | -1.29 |
| 2045 | Mospd2     | -1.29 |
| 2046 | St3gal6    | -1.29 |

|      |           |       |
|------|-----------|-------|
| 2047 | Tbccd1    | -1.29 |
| 2048 | Slfn13    | -1.29 |
| 2049 | Rcor3     | -1.29 |
| 2050 | Rabgap1l  | -1.29 |
| 2051 | Tor1aip2  | -1.29 |
| 2052 | Vamp7     | -1.29 |
| 2053 | Hip1      | -1.29 |
| 2054 | Dnajc9    | -1.29 |
| 2055 | Tdrd3     | -1.29 |
| 2056 | Sephs1    | -1.29 |
| 2057 | Col4a1    | -1.29 |
| 2058 | Bbs2      | -1.29 |
| 2059 | Vps26a    | -1.3  |
| 2060 | Nadsyn1   | -1.3  |
| 2061 | Arl6ip1   | -1.3  |
| 2062 | Chd2      | -1.3  |
| 2063 | Smc3      | -1.3  |
| 2064 | Nckap1    | -1.3  |
| 2065 | Ndufa8    | -1.3  |
| 2066 | Hax1      | -1.3  |
| 2067 | Ensa      | -1.3  |
| 2068 | Zfyve9    | -1.3  |
| 2069 | Smim8     | -1.3  |
| 2070 | Vcpip1    | -1.3  |
| 2071 | Usp48     | -1.3  |
| 2072 | Pigy      | -1.3  |
| 2073 | Adamts15  | -1.3  |
| 2074 | Shc2      | -1.3  |
| 2075 | R3hdm2    | -1.3  |
| 2076 | Vsnl1     | -1.3  |
| 2077 | Yipf4     | -1.3  |
| 2078 | Mpnd      | -1.3  |
| 2079 | Mpzl2     | -1.3  |
| 2080 | Ccdc65    | -1.3  |
| 2081 | Taok1     | -1.3  |
| 2082 | Lig3      | -1.3  |
| 2083 | Aacs      | -1.3  |
| 2084 | Sec14l2   | -1.3  |
| 2085 | LOC498592 | -1.3  |
| 2086 | Elmod2    | -1.3  |
| 2087 | Pik3c3    | -1.3  |

|      |            |       |
|------|------------|-------|
| 2088 | Lims2      | -1.3  |
| 2089 | RGD1309594 | -1.31 |
| 2090 | Ndufv3     | -1.31 |
| 2091 | Sfrp5      | -1.31 |
| 2092 | Arl14ep    | -1.31 |
| 2093 | Grb14      | -1.31 |
| 2094 | Npepl1     | -1.31 |
| 2095 | Cdc14a     | -1.31 |
| 2096 | Ankrd54    | -1.31 |
| 2097 | Ift27      | -1.31 |
| 2098 | Myh9       | -1.31 |
| 2099 | Ccdc41     | -1.31 |
| 2100 | Gpatch11   | -1.31 |
| 2101 | Slc5a6     | -1.31 |
| 2102 | Emr1       | -1.31 |
| 2103 | Armc9      | -1.31 |
| 2104 | Apeh       | -1.31 |
| 2105 | Nkap       | -1.31 |
| 2106 | Cryzl1     | -1.31 |
| 2107 | Eral1      | -1.31 |
| 2108 | Med31      | -1.31 |
| 2109 | Ncor1      | -1.31 |
| 2110 | B9d1       | -1.31 |
| 2111 | B9d1       | -1.31 |
| 2112 | Gosr1      | -1.31 |
| 2113 | Casc3      | -1.31 |
| 2114 | Pck2       | -1.31 |
| 2115 | Pfkp       | -1.31 |
| 2116 | Spg7       | -1.31 |
| 2117 | Fra10ac1   | -1.32 |
| 2118 | Mrpl48     | -1.32 |
| 2119 | Irgq       | -1.32 |
| 2120 | Pik3c2a    | -1.32 |
| 2121 | Eef2k      | -1.32 |
| 2122 | Fam102b    | -1.32 |
| 2123 | P2ry14     | -1.32 |
| 2124 | Usp33      | -1.32 |
| 2125 | Tmem51     | -1.32 |
| 2126 | Tmem57     | -1.32 |
| 2127 | Alad       | -1.32 |
| 2128 | Fkbp4      | -1.32 |

|      |           |       |
|------|-----------|-------|
| 2129 | Podxl2    | -1.32 |
| 2130 | Exoc6b    | -1.32 |
| 2131 | Lancl2    | -1.32 |
| 2132 | Myh9      | -1.32 |
| 2133 | Lrp1      | -1.32 |
| 2134 | Esyt1     | -1.32 |
| 2135 | Ptprm     | -1.32 |
| 2136 | Hes6      | -1.32 |
| 2137 | Sep-02    | -1.32 |
| 2138 | Dcps      | -1.32 |
| 2139 | Nme6      | -1.32 |
| 2140 | Pgrmc1    | -1.32 |
| 2141 | Inpp5k    | -1.32 |
| 2142 | Atpaf2    | -1.32 |
| 2143 | Higd1b    | -1.32 |
| 2144 | Taok3     | -1.32 |
| 2145 | Map2k7    | -1.32 |
| 2146 | Ccar2     | -1.32 |
| 2147 | Npy1r     | -1.32 |
| 2148 | Tkt       | -1.32 |
| 2149 | Zdhhc1    | -1.32 |
| 2150 | Stard4    | -1.32 |
| 2151 | C2        | -1.33 |
| 2152 | Pdss2     | -1.33 |
| 2153 | Tpp1      | -1.33 |
| 2154 | Enpp1     | -1.33 |
| 2155 | Tmem143   | -1.33 |
| 2156 | Hmgn5b    | -1.33 |
| 2157 | Vti1a     | -1.33 |
| 2158 | Elmo2     | -1.33 |
| 2159 | Casc4     | -1.33 |
| 2160 | Dap       | -1.33 |
| 2161 | Smim8     | -1.33 |
| 2162 | Sh3gl2    | -1.33 |
| 2163 | Gnb1      | -1.33 |
| 2164 | Nabp2     | -1.33 |
| 2165 | Ap3d1     | -1.33 |
| 2166 | Ndufa4l2  | -1.33 |
| 2167 | Oxr1      | -1.33 |
| 2168 | Exd2      | -1.33 |
| 2169 | Ndufa10l1 | -1.33 |

|      |            |       |
|------|------------|-------|
| 2170 | Tmem185a   | -1.33 |
| 2171 | Cul5       | -1.33 |
| 2172 | Ireb2      | -1.33 |
| 2173 | Amotl2     | -1.33 |
| 2174 | Glb1       | -1.33 |
| 2175 | Usp11      | -1.33 |
| 2176 | Apoo       | -1.33 |
| 2177 | Ctns       | -1.33 |
| 2178 | Naa60      | -1.33 |
| 2179 | Slit3      | -1.33 |
| 2180 | Golga3     | -1.33 |
| 2181 | Ap1s1      | -1.33 |
| 2182 | Kctd10     | -1.33 |
| 2183 | Prosc      | -1.33 |
| 2184 | Glo1       | -1.34 |
| 2185 | Prmt2      | -1.34 |
| 2186 | Tmem151a   | -1.34 |
| 2187 | Tmem151a   | -1.34 |
| 2188 | Hebp2      | -1.34 |
| 2189 | Megf8      | -1.34 |
| 2190 | Tubgcp5    | -1.34 |
| 2191 | Mesdc2     | -1.34 |
| 2192 | Mgmt       | -1.34 |
| 2193 | Ganab      | -1.34 |
| 2194 | Adnp       | -1.34 |
| 2195 | Chn1       | -1.34 |
| 2196 | Camsap1    | -1.34 |
| 2197 | Mrrf       | -1.34 |
| 2198 | Slc9a8     | -1.34 |
| 2199 | Rtel1      | -1.34 |
| 2200 | Igsf10     | -1.34 |
| 2201 | Gbp5       | -1.34 |
| 2202 | Prdm2      | -1.34 |
| 2203 | Acap3      | -1.34 |
| 2204 | Mgst1      | -1.34 |
| 2205 | RGD1307947 | -1.34 |
| 2206 | Brms1l     | -1.34 |
| 2207 | Pcnx       | -1.34 |
| 2208 | Ppp2r5c    | -1.34 |
| 2209 | Mocs1      | -1.34 |
| 2210 | Plekhb2    | -1.34 |

|      |          |       |
|------|----------|-------|
| 2211 | Aox1     | -1.34 |
| 2212 | Map2k5   | -1.34 |
| 2213 | Wdr61    | -1.34 |
| 2214 | Jrkl     | -1.34 |
| 2215 | Cldn1    | -1.34 |
| 2216 | Camkk1   | -1.34 |
| 2217 | F11r     | -1.34 |
| 2218 | Pcolce   | -1.34 |
| 2219 | Slc22a17 | -1.34 |
| 2220 | Entpd4   | -1.34 |
| 2221 | Slc1a4   | -1.34 |
| 2222 | Mapk10   | -1.34 |
| 2223 | Mapk10   | -1.34 |
| 2224 | Msmo1    | -1.34 |
| 2225 | Gpt2     | -1.34 |
| 2226 | Timm21   | -1.34 |
| 2227 | Aldh7a1  | -1.34 |
| 2228 | Smad2    | -1.34 |
| 2229 | Pnmal2   | -1.35 |
| 2230 | Sfxn3    | -1.35 |
| 2231 | Kcnc4    | -1.35 |
| 2232 | Ppa2     | -1.35 |
| 2233 | Nrbp2    | -1.35 |
| 2234 | Ppp1r16a | -1.35 |
| 2235 | Zfp386   | -1.35 |
| 2236 | Nudt16   | -1.35 |
| 2237 | Sep-07   | -1.35 |
| 2238 | Sep-07   | -1.35 |
| 2239 | Hexa     | -1.35 |
| 2240 | Pigp     | -1.35 |
| 2241 | Pdia5    | -1.35 |
| 2242 | Rhot2    | -1.35 |
| 2243 | Rpusd1   | -1.35 |
| 2244 | Rhbdf1   | -1.35 |
| 2245 | Kctd3    | -1.35 |
| 2246 | Trrap    | -1.35 |
| 2247 | Rbm26    | -1.35 |
| 2248 | Cdad1    | -1.35 |
| 2249 | Rnaseh2a | -1.35 |
| 2250 | Pggt1b   | -1.35 |
| 2251 | Smad2    | -1.35 |

|      |          |       |
|------|----------|-------|
| 2252 | Ehmt2    | -1.36 |
| 2253 | Bcam     | -1.36 |
| 2254 | Cyfip1   | -1.36 |
| 2255 | Hmgn5    | -1.36 |
| 2256 | Hddc3    | -1.36 |
| 2257 | Lym1     | -1.36 |
| 2258 | Tspan4   | -1.36 |
| 2259 | Tspan4   | -1.36 |
| 2260 | Ehd1     | -1.36 |
| 2261 | Atg10    | -1.36 |
| 2262 | Clic4    | -1.36 |
| 2263 | Adhfe1   | -1.36 |
| 2264 | Tmf1     | -1.36 |
| 2265 | Glcci1   | -1.36 |
| 2266 | Phf14    | -1.36 |
| 2267 | Krcc1    | -1.36 |
| 2268 | Ogg1     | -1.36 |
| 2269 | Zbtb7a   | -1.36 |
| 2270 | Nabp2    | -1.36 |
| 2271 | Lmbrd1   | -1.36 |
| 2272 | Map2k5   | -1.36 |
| 2273 | Tspan3   | -1.36 |
| 2274 | Zdhhc9   | -1.36 |
| 2275 | Foxo4    | -1.36 |
| 2276 | Yeats2   | -1.36 |
| 2277 | Abcc5    | -1.36 |
| 2278 | Klhl22   | -1.36 |
| 2279 | Exoc7    | -1.36 |
| 2280 | Exoc7    | -1.36 |
| 2281 | Nkiras2  | -1.36 |
| 2282 | Parp1    | -1.36 |
| 2283 | Mrps16   | -1.36 |
| 2284 | Idua     | -1.36 |
| 2285 | Naaa     | -1.36 |
| 2286 | Zfp346   | -1.36 |
| 2287 | Arhgap26 | -1.36 |
| 2288 | Qrsl1    | -1.37 |
| 2289 | Arf3     | -1.37 |
| 2290 | Atf5     | -1.37 |
| 2291 | Slc7a10  | -1.37 |
| 2292 | Men1     | -1.37 |

|      |            |       |
|------|------------|-------|
| 2293 | Pla2g16    | -1.37 |
| 2294 | RGD1564379 | -1.37 |
| 2295 | Celf1      | -1.37 |
| 2296 | Anapc1     | -1.37 |
| 2297 | Col4a3bp   | -1.37 |
| 2298 | Cp         | -1.37 |
| 2299 | Ash1l      | -1.37 |
| 2300 | Lsm10      | -1.37 |
| 2301 | Pon2       | -1.37 |
| 2302 | Wdr35l     | -1.37 |
| 2303 | Rdh14      | -1.37 |
| 2304 | Scly       | -1.37 |
| 2305 | Ube4a      | -1.37 |
| 2306 | Prps2      | -1.37 |
| 2307 | Zcchc12    | -1.37 |
| 2308 | Stag2      | -1.37 |
| 2309 | Zfp148     | -1.37 |
| 2310 | Myo1d      | -1.37 |
| 2311 | Epn2       | -1.37 |
| 2312 | Capn2      | -1.37 |
| 2313 | Fbxo21     | -1.37 |
| 2314 | Snrnp35    | -1.37 |
| 2315 | Eif2ak1    | -1.37 |
| 2316 | Clip1      | -1.37 |
| 2317 | Maea       | -1.37 |
| 2318 | Agtpbp1    | -1.37 |
| 2319 | Ctnna1     | -1.37 |
| 2320 | Gabbr1     | -1.38 |
| 2321 | Rps6ka4    | -1.38 |
| 2322 | Dgat2      | -1.38 |
| 2323 | Polg       | -1.38 |
| 2324 | Synm       | -1.38 |
| 2325 | Fchsd2     | -1.38 |
| 2326 | Sppl2a     | -1.38 |
| 2327 | Fubp3      | -1.38 |
| 2328 | Crat       | -1.38 |
| 2329 | Acp2       | -1.38 |
| 2330 | Prkaa1     | -1.38 |
| 2331 | Extl2      | -1.38 |
| 2332 | Ii11ra1    | -1.38 |
| 2333 | Ahdc1      | -1.38 |



|      |            |       |
|------|------------|-------|
| 2334 | Icmt       | -1.38 |
| 2335 | Atxn3      | -1.38 |
| 2336 | RGD1310553 | -1.38 |
| 2337 | Klhdc8b    | -1.38 |
| 2338 | Kbtbd3     | -1.38 |
| 2339 | Mrap2      | -1.38 |
| 2340 | C1galt1c1  | -1.38 |
| 2341 | Arf3       | -1.38 |
| 2342 | Usp9x      | -1.38 |
| 2343 | Zdhhc8     | -1.38 |
| 2344 | Epn2       | -1.38 |
| 2345 | Cpeb4      | -1.38 |
| 2346 | Usp7       | -1.38 |
| 2347 | Med9       | -1.38 |
| 2348 | Pld2       | -1.38 |
| 2349 | Mrpl10     | -1.38 |
| 2350 | Gtf2ird1   | -1.38 |
| 2351 | Mapk1ip1l  | -1.38 |
| 2352 | Sucla2     | -1.38 |
| 2353 | Gkap1      | -1.38 |
| 2354 | Ufsp2      | -1.38 |
| 2355 | Spcs3      | -1.38 |
| 2356 | Mgea5      | -1.39 |
| 2357 | Sae1       | -1.39 |
| 2358 | Fuca2      | -1.39 |
| 2359 | Slc2a8     | -1.39 |
| 2360 | Eya2       | -1.39 |
| 2361 | Magi3      | -1.39 |
| 2362 | Sec62      | -1.39 |
| 2363 | Rasa1      | -1.39 |
| 2364 | Cast       | -1.39 |
| 2365 | Rab33b     | -1.39 |
| 2366 | Adar       | -1.39 |
| 2367 | Pi4kb      | -1.39 |
| 2368 | Ssx2ip     | -1.39 |
| 2369 | Chmp5      | -1.39 |
| 2370 | Hp1bp3     | -1.39 |
| 2371 | Tnpo3      | -1.39 |
| 2372 | Zfp385a    | -1.39 |
| 2373 | Amigo2     | -1.39 |
| 2374 | Pros1      | -1.39 |

|      |              |       |
|------|--------------|-------|
| 2375 | Gls2         | -1.39 |
| 2376 | Stat6        | -1.39 |
| 2377 | Atxn10       | -1.39 |
| 2378 | Cys1         | -1.39 |
| 2379 | Ncoa1        | -1.39 |
| 2380 | Gstz1        | -1.39 |
| 2381 | Zc3h14       | -1.39 |
| 2382 | Pms1         | -1.39 |
| 2383 | B3gnt7       | -1.39 |
| 2384 | Golga4       | -1.39 |
| 2385 | Rai2         | -1.39 |
| 2386 | Cpox         | -1.39 |
| 2387 | Nsf          | -1.39 |
| 2388 | Ap2b1        | -1.39 |
| 2389 | Tnrc18       | -1.39 |
| 2390 | Chmp7        | -1.39 |
| 2391 | Gfra2        | -1.39 |
| 2392 | Exoc1        | -1.39 |
| 2393 | Celf4        | -1.39 |
| 2394 | Cables1      | -1.39 |
| 2395 | RGD1359158   | -1.4  |
| 2396 | Phactr3      | -1.4  |
| 2397 | Golga2       | -1.4  |
| 2398 | St6galnac6   | -1.4  |
| 2399 | Psm10        | -1.4  |
| 2400 | Rbm45        | -1.4  |
| 2401 | Cast         | -1.4  |
| 2402 | Ctsk         | -1.4  |
| 2403 | Fbxo2        | -1.4  |
| 2404 | Cpt1b        | -1.4  |
| 2405 | LOC100910996 | -1.4  |
| 2406 | Sgsm3        | -1.4  |
| 2407 | LOC689959    | -1.4  |
| 2408 | Tbcel        | -1.4  |
| 2409 | Faim         | -1.4  |
| 2410 | Faim         | -1.4  |
| 2411 | Ip6k1        | -1.4  |
| 2412 | Hmgn5        | -1.4  |
| 2413 | Clcn4        | -1.4  |
| 2414 | Igfbp1       | -1.4  |
| 2415 | Cant1        | -1.4  |

|      |            |       |
|------|------------|-------|
| 2416 | Dhx58      | -1.4  |
| 2417 | Sgsm2      | -1.4  |
| 2418 | Ankfy1     | -1.4  |
| 2419 | Timm44     | -1.4  |
| 2420 | Pxmp2      | -1.4  |
| 2421 | Upf2       | -1.4  |
| 2422 | St3gal2    | -1.4  |
| 2423 | Cdh13      | -1.4  |
| 2424 | Ntpcr      | -1.4  |
| 2425 | Vkorc1     | -1.41 |
| 2426 | Ube3a      | -1.41 |
| 2427 | Rab30      | -1.41 |
| 2428 | Ints4      | -1.41 |
| 2429 | Plekha1    | -1.41 |
| 2430 | Matn4      | -1.41 |
| 2431 | Cast       | -1.41 |
| 2432 | Mib2       | -1.41 |
| 2433 | Tapbpl     | -1.41 |
| 2434 | Cd4        | -1.41 |
| 2435 | Wnk1       | -1.41 |
| 2436 | Tmem43     | -1.41 |
| 2437 | Tgoln2     | -1.41 |
| 2438 | Snca       | -1.41 |
| 2439 | Suclg1     | -1.41 |
| 2440 | Zfp385a    | -1.41 |
| 2441 | Ttll12     | -1.41 |
| 2442 | LOC690617  | -1.41 |
| 2443 | Ylpm1      | -1.41 |
| 2444 | Pqlc3      | -1.41 |
| 2445 | Cdc42bpb   | -1.41 |
| 2446 | Mitd1      | -1.41 |
| 2447 | Vps11      | -1.41 |
| 2448 | Snrk       | -1.41 |
| 2449 | Serpinf1   | -1.41 |
| 2450 | Fam20c     | -1.41 |
| 2451 | Coro1c     | -1.41 |
| 2452 | Ang1       | -1.41 |
| 2453 | Mipep      | -1.41 |
| 2454 | Efemp1     | -1.41 |
| 2455 | RGD1307325 | -1.41 |
| 2456 | Sncg       | -1.41 |

|      |           |       |
|------|-----------|-------|
| 2457 | Sult5a1   | -1.41 |
| 2458 | Def8      | -1.41 |
| 2459 | Tpgs2     | -1.41 |
| 2460 | Pacsin1   | -1.42 |
| 2461 | Gucd1     | -1.42 |
| 2462 | Cdk19     | -1.42 |
| 2463 | Bbs1      | -1.42 |
| 2464 | Grik5     | -1.42 |
| 2465 | Cacng7    | -1.42 |
| 2466 | Trim34    | -1.42 |
| 2467 | Atp1a1    | -1.42 |
| 2468 | Mccc2     | -1.42 |
| 2469 | Cp        | -1.42 |
| 2470 | Gstm5     | -1.42 |
| 2471 | Gstm5     | -1.42 |
| 2472 | Lrrc42    | -1.42 |
| 2473 | Smim8     | -1.42 |
| 2474 | Aldh4a1   | -1.42 |
| 2475 | Plekhg5   | -1.42 |
| 2476 | Wnk1      | -1.42 |
| 2477 | Zfp385a   | -1.42 |
| 2478 | Rad21     | -1.42 |
| 2479 | Gls2      | -1.42 |
| 2480 | Kctd17    | -1.42 |
| 2481 | Snx13     | -1.42 |
| 2482 | Zbtb1     | -1.42 |
| 2483 | Uggt1     | -1.42 |
| 2484 | Pomgnt2   | -1.42 |
| 2485 | Cyb561d2  | -1.42 |
| 2486 | Ii20rb    | -1.42 |
| 2487 | Dixdc1    | -1.42 |
| 2488 | LOC691849 | -1.42 |
| 2489 | Smarcc1   | -1.42 |
| 2490 | Sacm1l    | -1.42 |
| 2491 | Armcx6    | -1.42 |
| 2492 | Arhgap31  | -1.42 |
| 2493 | Tnfsf13   | -1.42 |
| 2494 | Trap1     | -1.42 |
| 2495 | Tob1      | -1.42 |
| 2496 | Mpzl1     | -1.42 |
| 2497 | Fscn1     | -1.42 |

|      |            |       |
|------|------------|-------|
| 2498 | Zfp958     | -1.42 |
| 2499 | C1qtnf9    | -1.42 |
| 2500 | Cnrip1     | -1.42 |
| 2501 | Hsd17b11   | -1.42 |
| 2502 | Tmem17     | -1.42 |
| 2503 | Prpf4b     | -1.42 |
| 2504 | Arl10      | -1.42 |
| 2505 | Echdc3     | -1.42 |
| 2506 | Ap3m2      | -1.42 |
| 2507 | Tmlhe      | -1.43 |
| 2508 | Ebf3       | -1.43 |
| 2509 | RGD1559442 | -1.43 |
| 2510 | Pold3      | -1.43 |
| 2511 | Cebpg      | -1.43 |
| 2512 | Phactr2    | -1.43 |
| 2513 | Dact3      | -1.43 |
| 2514 | Cdk2ap2    | -1.43 |
| 2515 | Tcf7l2     | -1.43 |
| 2516 | Lrrc57     | -1.43 |
| 2517 | Dolpp1     | -1.43 |
| 2518 | Mtor       | -1.43 |
| 2519 | Mkrn2      | -1.43 |
| 2520 | Oxr1       | -1.43 |
| 2521 | Samm50     | -1.43 |
| 2522 | Ppp1r36    | -1.43 |
| 2523 | Inpp4a     | -1.43 |
| 2524 | Lingo1     | -1.43 |
| 2525 | LOC683077  | -1.43 |
| 2526 | Efnb1      | -1.43 |
| 2527 | Timmdc1    | -1.43 |
| 2528 | RGD1306954 | -1.43 |
| 2529 | Luc7l3     | -1.43 |
| 2530 | Dcaf7      | -1.43 |
| 2531 | Zfp68      | -1.43 |
| 2532 | Ift81      | -1.43 |
| 2533 | Cenpj      | -1.43 |
| 2534 | RGD1562018 | -1.43 |
| 2535 | Yme1l1     | -1.43 |
| 2536 | Yme1l1     | -1.43 |
| 2537 | Naa35      | -1.43 |
| 2538 | Sh3bp5     | -1.43 |

|      |            |       |
|------|------------|-------|
| 2539 | Jph3       | -1.43 |
| 2540 | Gtf3c1     | -1.44 |
| 2541 | Hsd3b7     | -1.44 |
| 2542 | Pnpla2     | -1.44 |
| 2543 | Pnpla2     | -1.44 |
| 2544 | Aldh1a1    | -1.44 |
| 2545 | Ssfa2      | -1.44 |
| 2546 | Tbc1d20    | -1.44 |
| 2547 | Cept1      | -1.44 |
| 2548 | Arsk       | -1.44 |
| 2549 | Crabp2     | -1.44 |
| 2550 | Fbxl4      | -1.44 |
| 2551 | Wnk1       | -1.44 |
| 2552 | Crbn       | -1.44 |
| 2553 | Galnt11    | -1.44 |
| 2554 | Galnt11    | -1.44 |
| 2555 | Kcnmb4     | -1.44 |
| 2556 | Atp2b1     | -1.44 |
| 2557 | Oxr1       | -1.44 |
| 2558 | Aco2       | -1.44 |
| 2559 | Nubpl      | -1.44 |
| 2560 | Tshr       | -1.44 |
| 2561 | Sema3b     | -1.44 |
| 2562 | Etfa       | -1.44 |
| 2563 | Keap1      | -1.44 |
| 2564 | Cep19      | -1.44 |
| 2565 | Tnk2       | -1.44 |
| 2566 | Gbe1       | -1.44 |
| 2567 | Nxn        | -1.44 |
| 2568 | Spop       | -1.44 |
| 2569 | Rnpep      | -1.44 |
| 2570 | RGD1306772 | -1.44 |
| 2571 | Fut11      | -1.44 |
| 2572 | Bcl2l2     | -1.44 |
| 2573 | Thtpa      | -1.44 |
| 2574 | Ly6c       | -1.44 |
| 2575 | Abcg3l2    | -1.44 |
| 2576 | Uba6       | -1.44 |
| 2577 | Sgcb       | -1.44 |
| 2578 | Aebp1      | -1.44 |
| 2579 | Vps36      | -1.44 |

|      |            |       |
|------|------------|-------|
| 2580 | Capn7      | -1.44 |
| 2581 | Tmem231    | -1.44 |
| 2582 | Nr3c2      | -1.44 |
| 2583 | Cdo1       | -1.44 |
| 2584 | Reep5      | -1.44 |
| 2585 | Ly6c       | -1.44 |
| 2586 | Lgi4       | -1.45 |
| 2587 | Dpcd       | -1.45 |
| 2588 | As3mt      | -1.45 |
| 2589 | Adra1d     | -1.45 |
| 2590 | Dusp19     | -1.45 |
| 2591 | Commd9     | -1.45 |
| 2592 | Pcdh18     | -1.45 |
| 2593 | Smim15     | -1.45 |
| 2594 | Selt       | -1.45 |
| 2595 | Prkab2     | -1.45 |
| 2596 | Phtf1      | -1.45 |
| 2597 | Rere       | -1.45 |
| 2598 | Insig1     | -1.45 |
| 2599 | Nt5dc3     | -1.45 |
| 2600 | Myg1       | -1.45 |
| 2601 | Prkd1      | -1.45 |
| 2602 | Gmppa      | -1.45 |
| 2603 | Fert2      | -1.45 |
| 2604 | Glyctk     | -1.45 |
| 2605 | Pccb       | -1.45 |
| 2606 | Fam46a     | -1.45 |
| 2607 | Ccp1       | -1.45 |
| 2608 | Myo5a      | -1.45 |
| 2609 | Leprel1    | -1.45 |
| 2610 | Proca1     | -1.45 |
| 2611 | Ulk2       | -1.45 |
| 2612 | Rph3al     | -1.45 |
| 2613 | Pigc       | -1.45 |
| 2614 | Zfp68      | -1.45 |
| 2615 | Haus4      | -1.45 |
| 2616 | Tm9sf2     | -1.45 |
| 2617 | Usp34      | -1.45 |
| 2618 | RGD1559896 | -1.45 |
| 2619 | Lman1      | -1.45 |
| 2620 | Atp6v1g2   | -1.46 |

|      |           |       |
|------|-----------|-------|
| 2621 | Ermp1     | -1.46 |
| 2622 | Slx1b     | -1.46 |
| 2623 | Trim3     | -1.46 |
| 2624 | Calm3     | -1.46 |
| 2625 | Smoc2     | -1.46 |
| 2626 | Abhd2     | -1.46 |
| 2627 | Tmem80    | -1.46 |
| 2628 | Tnks2     | -1.46 |
| 2629 | Tnks2     | -1.46 |
| 2630 | Ext2      | -1.46 |
| 2631 | Pcmdt2    | -1.46 |
| 2632 | Gstm4     | -1.46 |
| 2633 | Serpini1  | -1.46 |
| 2634 | Hint2     | -1.46 |
| 2635 | Col16a1   | -1.46 |
| 2636 | Dnajc14   | -1.46 |
| 2637 | Map4k5    | -1.46 |
| 2638 | Tmem178a  | -1.46 |
| 2639 | Myo1b     | -1.46 |
| 2640 | Sned1     | -1.46 |
| 2641 | Zfp266    | -1.46 |
| 2642 | Nap1l2    | -1.46 |
| 2643 | Med14     | -1.46 |
| 2644 | LOC679038 | -1.46 |
| 2645 | Canx      | -1.46 |
| 2646 | Fam195a   | -1.46 |
| 2647 | Parn      | -1.46 |
| 2648 | Rabep1    | -1.46 |
| 2649 | Grem2     | -1.46 |
| 2650 | Tpst1     | -1.46 |
| 2651 | Farp1     | -1.46 |
| 2652 | Inhba     | -1.46 |
| 2653 | Fam116a   | -1.46 |
| 2654 | Unc5b     | -1.47 |
| 2655 | Arl2      | -1.47 |
| 2656 | Mrvi1     | -1.47 |
| 2657 | Mrvi1     | -1.47 |
| 2658 | Plekha4   | -1.47 |
| 2659 | Tsc22d3   | -1.47 |
| 2660 | Lgr4      | -1.47 |
| 2661 | Zfp133    | -1.47 |



|      |          |       |
|------|----------|-------|
| 2662 | Gdap111  | -1.47 |
| 2663 | Cldn11   | -1.47 |
| 2664 | Gys2     | -1.47 |
| 2665 | Slc35b4  | -1.47 |
| 2666 | Dnal4    | -1.47 |
| 2667 | Gls2     | -1.47 |
| 2668 | Zc3h14   | -1.47 |
| 2669 | Cnnm3    | -1.47 |
| 2670 | Zc4h2    | -1.47 |
| 2671 | Maged1   | -1.47 |
| 2672 | Ltn1     | -1.47 |
| 2673 | Dusp3    | -1.47 |
| 2674 | Pfas     | -1.47 |
| 2675 | Clcn7    | -1.47 |
| 2676 | Slc25a35 | -1.47 |
| 2677 | Pla2g4a  | -1.47 |
| 2678 | Dcaf8    | -1.47 |
| 2679 | Hr       | -1.47 |
| 2680 | Zmynd11  | -1.47 |
| 2681 | Glud1    | -1.47 |
| 2682 | Colgalt1 | -1.47 |
| 2683 | Impa2    | -1.47 |
| 2684 | Serinc1  | -1.48 |
| 2685 | Tcf19    | -1.48 |
| 2686 | Nucb2    | -1.48 |
| 2687 | Dkk3     | -1.48 |
| 2688 | Idh2     | -1.48 |
| 2689 | Ssc5d    | -1.48 |
| 2690 | Ccdc90b  | -1.48 |
| 2691 | Ppfibp2  | -1.48 |
| 2692 | Vps39    | -1.48 |
| 2693 | Zranb2   | -1.48 |
| 2694 | Snapi    | -1.48 |
| 2695 | Wwtr1    | -1.48 |
| 2696 | Eltf1    | -1.48 |
| 2697 | Cdc26    | -1.48 |
| 2698 | Ggcn     | -1.48 |
| 2699 | Dcn      | -1.48 |
| 2700 | Gpt      | -1.48 |
| 2701 | Six1     | -1.48 |
| 2702 | Ndufaf7  | -1.48 |

|      |            |       |
|------|------------|-------|
| 2703 | Fam168b    | -1.48 |
| 2704 | Dis3l      | -1.48 |
| 2705 | Cspg4      | -1.48 |
| 2706 | Copb2      | -1.48 |
| 2707 | Mmgt1      | -1.48 |
| 2708 | Nap1l3     | -1.48 |
| 2709 | Tmem47     | -1.48 |
| 2710 | Rad51d     | -1.48 |
| 2711 | Rogdi      | -1.48 |
| 2712 | Mgat4b     | -1.48 |
| 2713 | Xpr1       | -1.48 |
| 2714 | Myoc       | -1.48 |
| 2715 | Rxrg       | -1.48 |
| 2716 | RGD1562310 | -1.48 |
| 2717 | Insr       | -1.48 |
| 2718 | Irs3       | -1.48 |
| 2719 | Ppp3cb     | -1.48 |
| 2720 | Letm1      | -1.48 |
| 2721 | Spred2     | -1.48 |
| 2722 | Ankrd10    | -1.48 |
| 2723 | Tmem184c   | -1.48 |
| 2724 | Galnt2     | -1.48 |
| 2725 | Fhod3      | -1.48 |
| 2726 | Pdzd8      | -1.49 |
| 2727 | Zdhhc6     | -1.49 |
| 2728 | Ntrk3      | -1.49 |
| 2729 | Mllt4      | -1.49 |
| 2730 | Sympk      | -1.49 |
| 2731 | Herc2      | -1.49 |
| 2732 | Cog7       | -1.49 |
| 2733 | Tmem80     | -1.49 |
| 2734 | Nrxn2      | -1.49 |
| 2735 | F2r        | -1.49 |
| 2736 | Dclk1      | -1.49 |
| 2737 | Cdc26      | -1.49 |
| 2738 | Rnf38      | -1.49 |
| 2739 | Nagk       | -1.49 |
| 2740 | Zfp638     | -1.49 |
| 2741 | Asb8       | -1.49 |
| 2742 | Xrcc6bp1   | -1.49 |
| 2743 | Nudt14     | -1.49 |

|      |         |       |
|------|---------|-------|
| 2744 | Dld     | -1.49 |
| 2745 | Rnf144a | -1.49 |
| 2746 | Ccdc71  | -1.49 |
| 2747 | Tmem42  | -1.49 |
| 2748 | Aatk    | -1.49 |
| 2749 | Trim37  | -1.49 |
| 2750 | Rpa1    | -1.49 |
| 2751 | Llgl1   | -1.49 |
| 2752 | Coasy   | -1.49 |
| 2753 | Plbd2   | -1.49 |
| 2754 | Zmynd11 | -1.49 |
| 2755 | Zmynd11 | -1.49 |
| 2756 | Zfp709  | -1.49 |
| 2757 | Pcdhgc3 | -1.49 |
| 2758 | Ssh3    | -1.5  |
| 2759 | Pddc1   | -1.5  |
| 2760 | Pddc1   | -1.5  |
| 2761 | Ntrk3   | -1.5  |
| 2762 | Cpt1c   | -1.5  |
| 2763 | Angpt4  | -1.5  |
| 2764 | Man1a2  | -1.5  |
| 2765 | Nnt     | -1.5  |
| 2766 | Hexb    | -1.5  |
| 2767 | Smim15  | -1.5  |
| 2768 | Tdrkh   | -1.5  |
| 2769 | Fam212b | -1.5  |
| 2770 | Wdtdc1  | -1.5  |
| 2771 | Eya3    | -1.5  |
| 2772 | Txnrd3  | -1.5  |
| 2773 | Cbx5    | -1.5  |
| 2774 | Pla2g6  | -1.5  |
| 2775 | Rassf9  | -1.5  |
| 2776 | Mtdh    | -1.5  |
| 2777 | Pdxdp   | -1.5  |
| 2778 | Cmtm6   | -1.5  |
| 2779 | Ubqln2  | -1.5  |
| 2780 | Ubtf    | -1.5  |
| 2781 | Kpnb1   | -1.5  |
| 2782 | Acadvl  | -1.5  |
| 2783 | Mgst3   | -1.5  |
| 2784 | Ptprg   | -1.5  |

|      |            |       |
|------|------------|-------|
| 2785 | Rarb       | -1.5  |
| 2786 | Chac2      | -1.5  |
| 2787 | Bicd2      | -1.5  |
| 2788 | Bicd2      | -1.5  |
| 2789 | Gpm6a      | -1.5  |
| 2790 | Nat1       | -1.5  |
| 2791 | Trappc11   | -1.5  |
| 2792 | Grtp1      | -1.5  |
| 2793 | Sult5a1    | -1.5  |
| 2794 | Slc38a7    | -1.5  |
| 2795 | Cdh2       | -1.5  |
| 2796 | RGD1305587 | -1.51 |
| 2797 | Stk32c     | -1.51 |
| 2798 | Ntrk3      | -1.51 |
| 2799 | RGD1308428 | -1.51 |
| 2800 | Zfp61      | -1.51 |
| 2801 | Tmx4       | -1.51 |
| 2802 | Ndufaf1    | -1.51 |
| 2803 | Atg13      | -1.51 |
| 2804 | Dpp7       | -1.51 |
| 2805 | Cdc26      | -1.51 |
| 2806 | Grhpr      | -1.51 |
| 2807 | Txnrd3     | -1.51 |
| 2808 | Pmm1       | -1.51 |
| 2809 | Pla2g6     | -1.51 |
| 2810 | Fbxo32     | -1.51 |
| 2811 | Atxn7l3b   | -1.51 |
| 2812 | Apol3      | -1.51 |
| 2813 | Lrpprc     | -1.51 |
| 2814 | Prkd3      | -1.51 |
| 2815 | Nek9       | -1.51 |
| 2816 | Ltbp2      | -1.51 |
| 2817 | Creb1      | -1.51 |
| 2818 | Igfbp2     | -1.51 |
| 2819 | Pnkd       | -1.51 |
| 2820 | Lztfl1     | -1.51 |
| 2821 | Nck1       | -1.51 |
| 2822 | Cask       | -1.51 |
| 2823 | Ubtf       | -1.51 |
| 2824 | Nr1d1      | -1.51 |
| 2825 | Npepps     | -1.51 |

|      |          |       |
|------|----------|-------|
| 2826 | Pdk2     | -1.51 |
| 2827 | Mapk9    | -1.51 |
| 2828 | Mprip    | -1.51 |
| 2829 | Copz2    | -1.51 |
| 2830 | Rfc1     | -1.51 |
| 2831 | Zmynd11  | -1.51 |
| 2832 | Micu3    | -1.51 |
| 2833 | Bst2     | -1.51 |
| 2834 | Sema3g   | -1.51 |
| 2835 | Mvd      | -1.51 |
| 2836 | Fxyd3    | -1.52 |
| 2837 | Brsk1    | -1.52 |
| 2838 | Fbxl19   | -1.52 |
| 2839 | Paox     | -1.52 |
| 2840 | Pbx3     | -1.52 |
| 2841 | Gchfr    | -1.52 |
| 2842 | Snapin   | -1.52 |
| 2843 | Hey1     | -1.52 |
| 2844 | Vwa1     | -1.52 |
| 2845 | Efcab7   | -1.52 |
| 2846 | Ece1     | -1.52 |
| 2847 | Slc6a15  | -1.52 |
| 2848 | Shank3   | -1.52 |
| 2849 | Dnajc27  | -1.52 |
| 2850 | Abhd5    | -1.52 |
| 2851 | Maob     | -1.52 |
| 2852 | Sh3bgrl  | -1.52 |
| 2853 | Mapk9    | -1.52 |
| 2854 | Tbc1d9b  | -1.52 |
| 2855 | Tnfaip1  | -1.52 |
| 2856 | Mycbp2   | -1.52 |
| 2857 | Ang      | -1.52 |
| 2858 | Peli2    | -1.52 |
| 2859 | Svil     | -1.52 |
| 2860 | Tecr     | -1.52 |
| 2861 | Banp     | -1.52 |
| 2862 | Gfra1    | -1.53 |
| 2863 | Tmem132a | -1.53 |
| 2864 | Fam53b   | -1.53 |
| 2865 | Trim21   | -1.53 |
| 2866 | Homer2   | -1.53 |

|      |              |       |
|------|--------------|-------|
| 2867 | Mef2a        | -1.53 |
| 2868 | Lhpp         | -1.53 |
| 2869 | Btrc         | -1.53 |
| 2870 | Lhfp         | -1.53 |
| 2871 | Ldlrap1      | -1.53 |
| 2872 | Leprot       | -1.53 |
| 2873 | Foxj3        | -1.53 |
| 2874 | Zfp46        | -1.53 |
| 2875 | Gstk1        | -1.53 |
| 2876 | RGD1561328   | -1.53 |
| 2877 | Pip4k2c      | -1.53 |
| 2878 | Acss3        | -1.53 |
| 2879 | Apol3        | -1.53 |
| 2880 | Ifi27        | -1.53 |
| 2881 | Stap2        | -1.53 |
| 2882 | Cdk5r2       | -1.53 |
| 2883 | Gpc1         | -1.53 |
| 2884 | Ppp2r3a      | -1.53 |
| 2885 | Hmbs         | -1.53 |
| 2886 | Cadm2        | -1.53 |
| 2887 | LOC100910318 | -1.53 |
| 2888 | LOC100910318 | -1.53 |
| 2889 | Engase       | -1.53 |
| 2890 | Ankle2       | -1.53 |
| 2891 | Abcg3l4      | -1.53 |
| 2892 | Ntrk2        | -1.53 |
| 2893 | Arhgef7      | -1.53 |
| 2894 | Dlc1         | -1.53 |
| 2895 | Grtp1        | -1.53 |
| 2896 | Phkb         | -1.53 |
| 2897 | Galnt1       | -1.53 |
| 2898 | Pln          | -1.54 |
| 2899 | Iqgap1       | -1.54 |
| 2900 | Myh14        | -1.54 |
| 2901 | Pcsk6        | -1.54 |
| 2902 | Alg8         | -1.54 |
| 2903 | Ap2a2        | -1.54 |
| 2904 | Ppip5k1      | -1.54 |
| 2905 | Acvr2a       | -1.54 |
| 2906 | Galk2        | -1.54 |
| 2907 | Atrn         | -1.54 |

|      |              |       |
|------|--------------|-------|
| 2908 | Apitd1       | -1.54 |
| 2909 | Mir3583      | -1.54 |
| 2910 | Usp5         | -1.54 |
| 2911 | Nr2c2        | -1.54 |
| 2912 | Spr          | -1.54 |
| 2913 | Wdr54        | -1.54 |
| 2914 | Hibadh       | -1.54 |
| 2915 | Bcl2l13      | -1.54 |
| 2916 | Sox10        | -1.54 |
| 2917 | Nudcd1       | -1.54 |
| 2918 | Ift172       | -1.54 |
| 2919 | Creb1        | -1.54 |
| 2920 | LOC501110    | -1.54 |
| 2921 | D2hgdh       | -1.54 |
| 2922 | Fxyd2        | -1.54 |
| 2923 | Cln6         | -1.54 |
| 2924 | Nprl2        | -1.54 |
| 2925 | Lztr1        | -1.54 |
| 2926 | Pi4ka        | -1.54 |
| 2927 | Mprip        | -1.54 |
| 2928 | Cltc         | -1.54 |
| 2929 | Astn1        | -1.54 |
| 2930 | Baz1b        | -1.54 |
| 2931 | Lats2        | -1.54 |
| 2932 | Lmo7         | -1.54 |
| 2933 | Pcgf3        | -1.54 |
| 2934 | Tbc1d7       | -1.54 |
| 2935 | Bloc1s5      | -1.54 |
| 2936 | Tmem59l      | -1.54 |
| 2937 | Tcf4         | -1.54 |
| 2938 | Anks1a       | -1.55 |
| 2939 | Sv2b         | -1.55 |
| 2940 | Map3k4       | -1.55 |
| 2941 | Ltbp3        | -1.55 |
| 2942 | Ppdpf        | -1.55 |
| 2943 | Fbxo4        | -1.55 |
| 2944 | Prkcz        | -1.55 |
| 2945 | Orc3         | -1.55 |
| 2946 | Pm20d2       | -1.55 |
| 2947 | Echdc2       | -1.55 |
| 2948 | LOC100294508 | -1.55 |

|      |              |       |
|------|--------------|-------|
| 2949 | Gpr153       | -1.55 |
| 2950 | Tspan9       | -1.55 |
| 2951 | Krt2         | -1.55 |
| 2952 | Tab1         | -1.55 |
| 2953 | Btbd7        | -1.55 |
| 2954 | Synj2bp      | -1.55 |
| 2955 | Coa5         | -1.55 |
| 2956 | Ddx25        | -1.55 |
| 2957 | Uba7         | -1.55 |
| 2958 | Rab33a       | -1.55 |
| 2959 | Snai2        | -1.55 |
| 2960 | LOC100910318 | -1.55 |
| 2961 | LOC100910318 | -1.55 |
| 2962 | Klhl20       | -1.55 |
| 2963 | Insig2       | -1.55 |
| 2964 | Fry          | -1.55 |
| 2965 | Vps33a       | -1.55 |
| 2966 | Smtn         | -1.55 |
| 2967 | Lgals8       | -1.55 |
| 2968 | Hsd17b4      | -1.55 |
| 2969 | Man1a1       | -1.56 |
| 2970 | Kif3b        | -1.56 |
| 2971 | Atf2         | -1.56 |
| 2972 | Them4        | -1.56 |
| 2973 | Arnt         | -1.56 |
| 2974 | RGD1561149   | -1.56 |
| 2975 | Ssbp3        | -1.56 |
| 2976 | Rspo1        | -1.56 |
| 2977 | Recql        | -1.56 |
| 2978 | Ilvbl        | -1.56 |
| 2979 | Ric8b        | -1.56 |
| 2980 | Ubr2         | -1.56 |
| 2981 | Enpp4        | -1.56 |
| 2982 | Fam134a      | -1.56 |
| 2983 | Gpc3         | -1.56 |
| 2984 | Dscr3        | -1.56 |
| 2985 | Son          | -1.56 |
| 2986 | Nme7         | -1.56 |
| 2987 | Setd8        | -1.56 |
| 2988 | Dapk1        | -1.56 |
| 2989 | Mbtps1       | -1.56 |



|      |           |       |
|------|-----------|-------|
| 2990 | Sil1      | -1.56 |
| 2991 | Tm7sf2    | -1.57 |
| 2992 | Caly      | -1.57 |
| 2993 | Tmem86a   | -1.57 |
| 2994 | Plce1     | -1.57 |
| 2995 | Rbbp9     | -1.57 |
| 2996 | Dync1i2   | -1.57 |
| 2997 | Dync1i2   | -1.57 |
| 2998 | Dync1i2   | -1.57 |
| 2999 | Astn2     | -1.57 |
| 3000 | Triqk     | -1.57 |
| 3001 | Ccnl2     | -1.57 |
| 3002 | Calcoco1  | -1.57 |
| 3003 | Calcoco1  | -1.57 |
| 3004 | Spryd3    | -1.57 |
| 3005 | Zfp251    | -1.57 |
| 3006 | Elk3      | -1.57 |
| 3007 | Cpq       | -1.57 |
| 3008 | Tmem106c  | -1.57 |
| 3009 | Eapp      | -1.57 |
| 3010 | Tmx1      | -1.57 |
| 3011 | Clic5     | -1.57 |
| 3012 | Tex264    | -1.57 |
| 3013 | Rab8b     | -1.57 |
| 3014 | Zfp426    | -1.57 |
| 3015 | Pik3r4    | -1.57 |
| 3016 | Taf9b     | -1.57 |
| 3017 | Prkca     | -1.57 |
| 3018 | Vtn       | -1.57 |
| 3019 | Mapk9     | -1.57 |
| 3020 | Rdm1      | -1.57 |
| 3021 | Acox3     | -1.57 |
| 3022 | Mob1b     | -1.57 |
| 3023 | Thap6     | -1.57 |
| 3024 | Tmem150c  | -1.57 |
| 3025 | LOC680039 | -1.57 |
| 3026 | Itga8     | -1.57 |
| 3027 | Mvb12a    | -1.57 |
| 3028 | Mt3       | -1.57 |
| 3029 | Cdh11     | -1.57 |
| 3030 | Mib1      | -1.57 |

|      |           |       |
|------|-----------|-------|
| 3031 | Ostm1     | -1.58 |
| 3032 | Slco3a1   | -1.58 |
| 3033 | Lrrk1     | -1.58 |
| 3034 | Pex7      | -1.58 |
| 3035 | Lrrc4b    | -1.58 |
| 3036 | Prcp      | -1.58 |
| 3037 | Cops2     | -1.58 |
| 3038 | Kpna6     | -1.58 |
| 3039 | Abcc9     | -1.58 |
| 3040 | Hdac11    | -1.58 |
| 3041 | Bet1      | -1.58 |
| 3042 | Abcb8     | -1.58 |
| 3043 | Immt      | -1.58 |
| 3044 | Tbc1d5    | -1.58 |
| 3045 | Slc4a3    | -1.58 |
| 3046 | Ei24      | -1.58 |
| 3047 | Vps26b    | -1.58 |
| 3048 | Hmg20a    | -1.58 |
| 3049 | Adcy5     | -1.58 |
| 3050 | Nr1d1     | -1.58 |
| 3051 | Fbxl16    | -1.58 |
| 3052 | Smcr8     | -1.58 |
| 3053 | Dynll2    | -1.58 |
| 3054 | Camsap2   | -1.58 |
| 3055 | Erlec1    | -1.58 |
| 3056 | Tbc1d19   | -1.58 |
| 3057 | Spata24   | -1.58 |
| 3058 | Rbfa      | -1.58 |
| 3059 | LOC606294 | -1.59 |
| 3060 | Nmrk1     | -1.59 |
| 3061 | Caly      | -1.59 |
| 3062 | Numa1     | -1.59 |
| 3063 | Ctr9      | -1.59 |
| 3064 | Efcab4a   | -1.59 |
| 3065 | Efcab4a   | -1.59 |
| 3066 | Ankef1    | -1.59 |
| 3067 | Fnbp1l    | -1.59 |
| 3068 | Postn     | -1.59 |
| 3069 | Plod1     | -1.59 |
| 3070 | Gne       | -1.59 |
| 3071 | Clec2l    | -1.59 |

|      |            |       |
|------|------------|-------|
| 3072 | Mar-08     | -1.59 |
| 3073 | Cyp2d4     | -1.59 |
| 3074 | Frmd6      | -1.59 |
| 3075 | Btbd6      | -1.59 |
| 3076 | Htr2b      | -1.59 |
| 3077 | Idh3a      | -1.59 |
| 3078 | Snap47     | -1.59 |
| 3079 | Tsc2       | -1.59 |
| 3080 | Dnaja3     | -1.59 |
| 3081 | Nfatc4     | -1.59 |
| 3082 | Hfe        | -1.59 |
| 3083 | Net1       | -1.59 |
| 3084 | Lphn1      | -1.59 |
| 3085 | Napg       | -1.59 |
| 3086 | Rhobtb1    | -1.6  |
| 3087 | Ranbp6     | -1.6  |
| 3088 | Frmd8      | -1.6  |
| 3089 | Gprc5b     | -1.6  |
| 3090 | Cdc42ep5   | -1.6  |
| 3091 | Uqcrc2     | -1.6  |
| 3092 | Mvb12b     | -1.6  |
| 3093 | Ccbl1      | -1.6  |
| 3094 | Zfyve19    | -1.6  |
| 3095 | Ywhab      | -1.6  |
| 3096 | Mccc1      | -1.6  |
| 3097 | Gpx8       | -1.6  |
| 3098 | Ctbs       | -1.6  |
| 3099 | Tmem53     | -1.6  |
| 3100 | RGD1311164 | -1.6  |
| 3101 | Pex1       | -1.6  |
| 3102 | Fam118a    | -1.6  |
| 3103 | Fbln5      | -1.6  |
| 3104 | Prepl      | -1.6  |
| 3105 | Cmpk2      | -1.6  |
| 3106 | Mpp5       | -1.6  |
| 3107 | Bend6      | -1.6  |
| 3108 | Yes1       | -1.6  |
| 3109 | Ift46      | -1.6  |
| 3110 | Rdx        | -1.6  |
| 3111 | RragB      | -1.6  |
| 3112 | RragB      | -1.6  |

|      |         |       |
|------|---------|-------|
| 3113 | Nthl1   | -1.6  |
| 3114 | Nudcd2  | -1.6  |
| 3115 | Lamc1   | -1.6  |
| 3116 | Cyb5r1  | -1.6  |
| 3117 | Tecpr1  | -1.6  |
| 3118 | P2rx2   | -1.6  |
| 3119 | Cln5    | -1.6  |
| 3120 | Txndc15 | -1.6  |
| 3121 | Sirt5   | -1.6  |
| 3122 | Hfe     | -1.6  |
| 3123 | Dip2c   | -1.6  |
| 3124 | Fbxo25  | -1.6  |
| 3125 | Star    | -1.6  |
| 3126 | Mc2r    | -1.6  |
| 3127 | Dym     | -1.6  |
| 3128 | Akap7   | -1.61 |
| 3129 | Rab14   | -1.61 |
| 3130 | Chp1    | -1.61 |
| 3131 | Npr1    | -1.61 |
| 3132 | Mfsd8   | -1.61 |
| 3133 | Trim23  | -1.61 |
| 3134 | Pla2g5  | -1.61 |
| 3135 | Lactb2  | -1.61 |
| 3136 | Tmtc3   | -1.61 |
| 3137 | Ormdl2  | -1.61 |
| 3138 | Ptpn21  | -1.61 |
| 3139 | Cpsf3   | -1.61 |
| 3140 | Bmpr2   | -1.61 |
| 3141 | Abi2    | -1.61 |
| 3142 | Zfp161  | -1.61 |
| 3143 | Ptpn9   | -1.61 |
| 3144 | Slc9a9  | -1.61 |
| 3145 | Gprasp1 | -1.61 |
| 3146 | Nit2    | -1.61 |
| 3147 | Cpped1  | -1.61 |
| 3148 | Zfp354a | -1.61 |
| 3149 | Dhrs7b  | -1.61 |
| 3150 | Plscr3  | -1.61 |
| 3151 | Ankrd40 | -1.61 |
| 3152 | Trove2  | -1.61 |
| 3153 | lpo9    | -1.61 |

|      |            |       |
|------|------------|-------|
| 3154 | Lias       | -1.61 |
| 3155 | Plxdc2     | -1.61 |
| 3156 | Dusp4      | -1.61 |
| 3157 | Cldn22     | -1.61 |
| 3158 | Epb41l4a   | -1.61 |
| 3159 | Ankrd27    | -1.62 |
| 3160 | Gab2       | -1.62 |
| 3161 | Shoc2      | -1.62 |
| 3162 | Ctdspl2    | -1.62 |
| 3163 | Ift80      | -1.62 |
| 3164 | RGD1305938 | -1.62 |
| 3165 | Erap1      | -1.62 |
| 3166 | Ap3b1      | -1.62 |
| 3167 | Etv3       | -1.62 |
| 3168 | Fbxo44     | -1.62 |
| 3169 | Txlna      | -1.62 |
| 3170 | Fam219a    | -1.62 |
| 3171 | Tp53inp1   | -1.62 |
| 3172 | Cachd1     | -1.62 |
| 3173 | Gmcl1      | -1.62 |
| 3174 | Them6      | -1.62 |
| 3175 | Trip11     | -1.62 |
| 3176 | Ralbp1     | -1.62 |
| 3177 | Fam135a    | -1.62 |
| 3178 | Cyp39a1    | -1.62 |
| 3179 | Acy1       | -1.62 |
| 3180 | Apool      | -1.62 |
| 3181 | Opa1       | -1.62 |
| 3182 | App        | -1.62 |
| 3183 | Rnd2       | -1.62 |
| 3184 | Amz2       | -1.62 |
| 3185 | Hsd11b1    | -1.62 |
| 3186 | Pdhb       | -1.62 |
| 3187 | Clybl      | -1.62 |
| 3188 | Nmt2       | -1.62 |
| 3189 | Cldn24     | -1.62 |
| 3190 | Polb       | -1.62 |
| 3191 | Chtf8      | -1.62 |
| 3192 | Tnpo2      | -1.62 |
| 3193 | Slc29a3    | -1.63 |
| 3194 | Pde9a      | -1.63 |

|      |          |       |
|------|----------|-------|
| 3195 | Ascc1    | -1.63 |
| 3196 | Dak      | -1.63 |
| 3197 | Tram111  | -1.63 |
| 3198 | Megf9    | -1.63 |
| 3199 | Ipp      | -1.63 |
| 3200 | Thns12   | -1.63 |
| 3201 | Cbx3     | -1.63 |
| 3202 | Zfpm2    | -1.63 |
| 3203 | Ttc38    | -1.63 |
| 3204 | Metrn    | -1.63 |
| 3205 | Ywhag    | -1.63 |
| 3206 | Rnaseh2b | -1.63 |
| 3207 | Tmed4    | -1.63 |
| 3208 | Fars2    | -1.63 |
| 3209 | Hacl1    | -1.63 |
| 3210 | Lig4     | -1.63 |
| 3211 | Abcd1    | -1.64 |
| 3212 | Plekhf1  | -1.64 |
| 3213 | Ppp1r16b | -1.64 |
| 3214 | Gdap1    | -1.64 |
| 3215 | Col15a1  | -1.64 |
| 3216 | Tmem237  | -1.64 |
| 3217 | Abhd14a  | -1.64 |
| 3218 | Mcam     | -1.64 |
| 3219 | Larp6    | -1.64 |
| 3220 | Map7d3   | -1.64 |
| 3221 | Ptpn4    | -1.64 |
| 3222 | Lpgat1   | -1.64 |
| 3223 | Wdr92    | -1.64 |
| 3224 | Grb10    | -1.64 |
| 3225 | Cplx1    | -1.64 |
| 3226 | Man2b2   | -1.64 |
| 3227 | Arhgap12 | -1.64 |
| 3228 | Hsdl1    | -1.64 |
| 3229 | Mcu      | -1.65 |
| 3230 | Gpr137   | -1.65 |
| 3231 | Pwwp2b   | -1.65 |
| 3232 | Hoxd9    | -1.65 |
| 3233 | Impa1    | -1.65 |
| 3234 | Spg20    | -1.65 |
| 3235 | Smc2     | -1.65 |

|      |            |       |
|------|------------|-------|
| 3236 | C2cd5      | -1.65 |
| 3237 | Rergl      | -1.65 |
| 3238 | Ica1       | -1.65 |
| 3239 | Sgce       | -1.65 |
| 3240 | Acn9       | -1.65 |
| 3241 | Ahcyl2     | -1.65 |
| 3242 | Plxnb2     | -1.65 |
| 3243 | Tmem229b   | -1.65 |
| 3244 | Sc5d       | -1.65 |
| 3245 | Mcam       | -1.65 |
| 3246 | Chm        | -1.65 |
| 3247 | Stx1a      | -1.65 |
| 3248 | Cyth3      | -1.65 |
| 3249 | Mri1       | -1.65 |
| 3250 | Pex19      | -1.65 |
| 3251 | RGD735029  | -1.65 |
| 3252 | MGC105567  | -1.65 |
| 3253 | LOC683897  | -1.66 |
| 3254 | C4a        | -1.66 |
| 3255 | RGD1309540 | -1.66 |
| 3256 | Abca2      | -1.66 |
| 3257 | Olfm1      | -1.66 |
| 3258 | Dab2ip     | -1.66 |
| 3259 | Ivd        | -1.66 |
| 3260 | Ift52      | -1.66 |
| 3261 | Adh5       | -1.66 |
| 3262 | Pdia4      | -1.66 |
| 3263 | Chn2       | -1.66 |
| 3264 | Mgat3      | -1.66 |
| 3265 | Epas1      | -1.66 |
| 3266 | Ocrl       | -1.66 |
| 3267 | Plcd3      | -1.66 |
| 3268 | Sat2       | -1.66 |
| 3269 | Gal3st4    | -1.66 |
| 3270 | Tns3       | -1.66 |
| 3271 | Tspan17    | -1.66 |
| 3272 | Gas6       | -1.66 |
| 3273 | Mrpl34     | -1.66 |
| 3274 | Tll1       | -1.66 |
| 3275 | Coprs      | -1.66 |
| 3276 | LOC679149  | -1.66 |

|      |          |       |
|------|----------|-------|
| 3277 | Synpo    | -1.66 |
| 3278 | Mtch1    | -1.67 |
| 3279 | Vps13a   | -1.67 |
| 3280 | Nrip3    | -1.67 |
| 3281 | Man2a2   | -1.67 |
| 3282 | Aplp1    | -1.67 |
| 3283 | Pgap2    | -1.67 |
| 3284 | Ddb1     | -1.67 |
| 3285 | Bmyc     | -1.67 |
| 3286 | Cbfa2t2  | -1.67 |
| 3287 | Vwa5a    | -1.67 |
| 3288 | Stx16    | -1.67 |
| 3289 | Dnajc5   | -1.67 |
| 3290 | Rfesd    | -1.67 |
| 3291 | C1s      | -1.67 |
| 3292 | Rbm33    | -1.67 |
| 3293 | Bbs10    | -1.67 |
| 3294 | Tgfb3    | -1.67 |
| 3295 | Clec14a  | -1.67 |
| 3296 | Ralgapa1 | -1.67 |
| 3297 | Man2a1   | -1.67 |
| 3298 | Cmc1     | -1.67 |
| 3299 | Vwa5a    | -1.67 |
| 3300 | Snpc5    | -1.67 |
| 3301 | Itsn1    | -1.67 |
| 3302 | Pcyt2    | -1.67 |
| 3303 | Dhrs4    | -1.67 |
| 3304 | Klhl5    | -1.67 |
| 3305 | Abhd8    | -1.67 |
| 3306 | Slc10a7  | -1.67 |
| 3307 | Tppp     | -1.68 |
| 3308 | Cebpa    | -1.68 |
| 3309 | Cebpa    | -1.68 |
| 3310 | Ralgapb  | -1.68 |
| 3311 | Nacc2    | -1.68 |
| 3312 | Cd59     | -1.68 |
| 3313 | Paqr6    | -1.68 |
| 3314 | Gmcl1    | -1.68 |
| 3315 | Tia1     | -1.68 |
| 3316 | St3gal1  | -1.68 |
| 3317 | Sel1l    | -1.68 |



|      |           |       |
|------|-----------|-------|
| 3318 | Pth1r     | -1.68 |
| 3319 | Bcl9l     | -1.68 |
| 3320 | Plekhh3   | -1.68 |
| 3321 | Med1      | -1.68 |
| 3322 | Mtmr4     | -1.68 |
| 3323 | Scpep1    | -1.68 |
| 3324 | Aldh9a1   | -1.68 |
| 3325 | Pex19     | -1.68 |
| 3326 | Rhbdd2    | -1.68 |
| 3327 | Trim35    | -1.68 |
| 3328 | C1qtnf7   | -1.68 |
| 3329 | Spon2     | -1.68 |
| 3330 | Dbn1      | -1.68 |
| 3331 | Hfe       | -1.68 |
| 3332 | Tradd     | -1.68 |
| 3333 | Cebpa     | -1.69 |
| 3334 | Cebpa     | -1.69 |
| 3335 | Mical2    | -1.69 |
| 3336 | Tmem159   | -1.69 |
| 3337 | Tmem223   | -1.69 |
| 3338 | Caprin1   | -1.69 |
| 3339 | Anp32a    | -1.69 |
| 3340 | Gstm7     | -1.69 |
| 3341 | Ptcd2     | -1.69 |
| 3342 | Clvs1     | -1.69 |
| 3343 | Ccdc132   | -1.69 |
| 3344 | Tmpo      | -1.69 |
| 3345 | Ccdc53    | -1.69 |
| 3346 | LOC500948 | -1.69 |
| 3347 | Dcbld2    | -1.69 |
| 3348 | Erg       | -1.69 |
| 3349 | Tada2a    | -1.69 |
| 3350 | Rab34     | -1.69 |
| 3351 | Mapk8ip3  | -1.69 |
| 3352 | Dnaja3    | -1.69 |
| 3353 | Exoc5     | -1.69 |
| 3354 | Shisa3    | -1.69 |
| 3355 | Clock     | -1.69 |
| 3356 | Lox       | -1.69 |
| 3357 | Pank1     | -1.7  |
| 3358 | Stx3      | -1.7  |

|      |            |       |
|------|------------|-------|
| 3359 | Fam50a     | -1.7  |
| 3360 | Slk        | -1.7  |
| 3361 | Znfx1      | -1.7  |
| 3362 | Dpp4       | -1.7  |
| 3363 | Adamts12   | -1.7  |
| 3364 | Alg14      | -1.7  |
| 3365 | Ccdc28b    | -1.7  |
| 3366 | Rragc      | -1.7  |
| 3367 | Sdc3       | -1.7  |
| 3368 | Itpr2      | -1.7  |
| 3369 | RGD1306151 | -1.7  |
| 3370 | Ptk2       | -1.7  |
| 3371 | Asap1      | -1.7  |
| 3372 | Irak1bp1   | -1.7  |
| 3373 | Ska2       | -1.7  |
| 3374 | Aldh3a2    | -1.7  |
| 3375 | Cnot6      | -1.7  |
| 3376 | Fopnl      | -1.7  |
| 3377 | Glod4      | -1.7  |
| 3378 | Myo18a     | -1.7  |
| 3379 | Gigyf1     | -1.7  |
| 3380 | Mcpt1l1    | -1.7  |
| 3381 | Pcm1       | -1.7  |
| 3382 | Tmem110    | -1.7  |
| 3383 | Cyp4v3     | -1.7  |
| 3384 | C4b        | -1.71 |
| 3385 | Dip2a      | -1.71 |
| 3386 | Stx7       | -1.71 |
| 3387 | Cdc42bpg   | -1.71 |
| 3388 | Cpne1      | -1.71 |
| 3389 | Cpne1      | -1.71 |
| 3390 | Sgtb       | -1.71 |
| 3391 | Cdh6       | -1.71 |
| 3392 | Scp2       | -1.71 |
| 3393 | Npr2       | -1.71 |
| 3394 | Fam50a     | -1.71 |
| 3395 | Arhgef25   | -1.71 |
| 3396 | Baz2a      | -1.71 |
| 3397 | Cyp4f5     | -1.71 |
| 3398 | Cyp4f5     | -1.71 |
| 3399 | Tc2n       | -1.71 |

|      |          |       |
|------|----------|-------|
| 3400 | Slc8a1   | -1.71 |
| 3401 | Slc8a1   | -1.71 |
| 3402 | Slc8a1   | -1.71 |
| 3403 | Slc8a1   | -1.71 |
| 3404 | Slc8a1   | -1.71 |
| 3405 | Inpp1    | -1.71 |
| 3406 | Scn3b    | -1.71 |
| 3407 | Rtp4     | -1.71 |
| 3408 | Smarcd2  | -1.71 |
| 3409 | Rufy1    | -1.71 |
| 3410 | Kif1c    | -1.71 |
| 3411 | Gaa      | -1.71 |
| 3412 | Usp12    | -1.71 |
| 3413 | Mmd2     | -1.71 |
| 3414 | Jakmip1  | -1.71 |
| 3415 | Ntrk2    | -1.71 |
| 3416 | Apc      | -1.71 |
| 3417 | Gstt3    | -1.72 |
| 3418 | Lrrtm3   | -1.72 |
| 3419 | Morn4    | -1.72 |
| 3420 | Capn1    | -1.72 |
| 3421 | Taok2    | -1.72 |
| 3422 | Fcgrt    | -1.72 |
| 3423 | Arhgap35 | -1.72 |
| 3424 | Pepd     | -1.72 |
| 3425 | Phf20    | -1.72 |
| 3426 | Slc4a10  | -1.72 |
| 3427 | Gstm2    | -1.72 |
| 3428 | Ttc33    | -1.72 |
| 3429 | Gba      | -1.72 |
| 3430 | Wdr47    | -1.72 |
| 3431 | Ccl21    | -1.72 |
| 3432 | Hoxa6    | -1.72 |
| 3433 | Hoxa6    | -1.72 |
| 3434 | Cav1     | -1.72 |
| 3435 | Slc35e3  | -1.72 |
| 3436 | Hoxc9    | -1.72 |
| 3437 | Sptssa   | -1.72 |
| 3438 | Slc8a1   | -1.72 |
| 3439 | Slc8a1   | -1.72 |
| 3440 | Msantd4  | -1.72 |

|      |         |       |
|------|---------|-------|
| 3441 | Rbp1    | -1.72 |
| 3442 | Hoxa6   | -1.72 |
| 3443 | Iqsec2  | -1.72 |
| 3444 | Xylt2   | -1.72 |
| 3445 | Mfap4   | -1.72 |
| 3446 | Mfap4   | -1.72 |
| 3447 | Dlg4    | -1.72 |
| 3448 | Sertad4 | -1.72 |
| 3449 | Slc45a3 | -1.72 |
| 3450 | Mdh1    | -1.72 |
| 3451 | Actr2   | -1.72 |
| 3452 | Evi5    | -1.72 |
| 3453 | Tdrp    | -1.72 |
| 3454 | Ldhd    | -1.72 |
| 3455 | Afap1l1 | -1.72 |
| 3456 | Ddr1    | -1.73 |
| 3457 | Gcc2    | -1.73 |
| 3458 | Klf9    | -1.73 |
| 3459 | Gstm1   | -1.73 |
| 3460 | Hspa4l  | -1.73 |
| 3461 | S100a13 | -1.73 |
| 3462 | Dock7   | -1.73 |
| 3463 | Ikbkap  | -1.73 |
| 3464 | Maged2  | -1.73 |
| 3465 | Lurap1l | -1.73 |
| 3466 | Zfp467  | -1.73 |
| 3467 | Tprkb   | -1.73 |
| 3468 | Slc8a1  | -1.73 |
| 3469 | Adi1    | -1.73 |
| 3470 | Itm2a   | -1.73 |
| 3471 | Zmym3   | -1.73 |
| 3472 | Sms     | -1.73 |
| 3473 | Ogt     | -1.73 |
| 3474 | Senp7   | -1.73 |
| 3475 | Itsn1   | -1.73 |
| 3476 | Ltc4s   | -1.73 |
| 3477 | Glyr1   | -1.73 |
| 3478 | Scrn2   | -1.73 |
| 3479 | Nbr1    | -1.73 |
| 3480 | Fmo4    | -1.73 |
| 3481 | Dbi     | -1.73 |

|      |            |       |
|------|------------|-------|
| 3482 | Mvk        | -1.73 |
| 3483 | Vsig10     | -1.73 |
| 3484 | Rhobtb2    | -1.73 |
| 3485 | Nudt5      | -1.73 |
| 3486 | Nat1       | -1.73 |
| 3487 | Ushbp1     | -1.73 |
| 3488 | Glt8d1     | -1.73 |
| 3489 | Cesl1      | -1.73 |
| 3490 | Ces1f      | -1.73 |
| 3491 | Ddr1       | -1.74 |
| 3492 | Bex1       | -1.74 |
| 3493 | Drosha     | -1.74 |
| 3494 | Golph3l    | -1.74 |
| 3495 | Psip1      | -1.74 |
| 3496 | Maged2     | -1.74 |
| 3497 | Oscp1      | -1.74 |
| 3498 | Ldhb       | -1.74 |
| 3499 | Rnf41      | -1.74 |
| 3500 | Slc8a1     | -1.74 |
| 3501 | Tmed3      | -1.74 |
| 3502 | Fxyd2      | -1.74 |
| 3503 | Paqr4      | -1.74 |
| 3504 | Pkd1       | -1.74 |
| 3505 | Fcer1a     | -1.74 |
| 3506 | Tsn        | -1.74 |
| 3507 | Cryl1      | -1.74 |
| 3508 | RGD1306063 | -1.74 |
| 3509 | Thrb       | -1.74 |
| 3510 | Ykt6       | -1.74 |
| 3511 | Sfxn1      | -1.74 |
| 3512 | Dok4       | -1.74 |
| 3513 | Nfatc3     | -1.74 |
| 3514 | Ms4a2      | -1.75 |
| 3515 | Osbpl5     | -1.75 |
| 3516 | Ltbp4      | -1.75 |
| 3517 | Apba2      | -1.75 |
| 3518 | Dock1      | -1.75 |
| 3519 | Acy3       | -1.75 |
| 3520 | Marveld1   | -1.75 |
| 3521 | Ckmt1b     | -1.75 |
| 3522 | Jade1      | -1.75 |

|      |            |       |
|------|------------|-------|
| 3523 | Mpdz       | -1.75 |
| 3524 | Maged2     | -1.75 |
| 3525 | Yipf1      | -1.75 |
| 3526 | Trappc3    | -1.75 |
| 3527 | Mrps33     | -1.75 |
| 3528 | Cav1       | -1.75 |
| 3529 | Tprkb      | -1.75 |
| 3530 | Arsa       | -1.75 |
| 3531 | Rab5b      | -1.75 |
| 3532 | Prima1     | -1.75 |
| 3533 | RGD1311756 | -1.75 |
| 3534 | Gsta1      | -1.75 |
| 3535 | Acpl2      | -1.75 |
| 3536 | Tmem205    | -1.75 |
| 3537 | Zfp846     | -1.75 |
| 3538 | Golgb1     | -1.75 |
| 3539 | RGD1310429 | -1.75 |
| 3540 | Rad50      | -1.75 |
| 3541 | Mink1      | -1.75 |
| 3542 | Fmo4       | -1.75 |
| 3543 | Pcca       | -1.75 |
| 3544 | Epdr1      | -1.75 |
| 3545 | Exoc2      | -1.75 |
| 3546 | Ogfod1     | -1.75 |
| 3547 | Igf2r      | -1.76 |
| 3548 | Tmem126b   | -1.76 |
| 3549 | Inpp5f     | -1.76 |
| 3550 | Agps       | -1.76 |
| 3551 | Arsb       | -1.76 |
| 3552 | MGC94199   | -1.76 |
| 3553 | MGC94199   | -1.76 |
| 3554 | Ppt1       | -1.76 |
| 3555 | Ccdc91     | -1.76 |
| 3556 | ErbB3      | -1.76 |
| 3557 | Rdh11      | -1.76 |
| 3558 | Nrcam      | -1.76 |
| 3559 | Gsta3      | -1.76 |
| 3560 | Gsta3      | -1.76 |
| 3561 | Gsta3      | -1.76 |
| 3562 | Casp12     | -1.76 |
| 3563 | Pfkfb1     | -1.76 |

|      |              |       |
|------|--------------|-------|
| 3564 | Heph         | -1.76 |
| 3565 | Arl6         | -1.76 |
| 3566 | Dtx3l        | -1.76 |
| 3567 | LOC360228    | -1.76 |
| 3568 | Acbd4        | -1.76 |
| 3569 | Ace          | -1.76 |
| 3570 | Dars2        | -1.76 |
| 3571 | Dstyk        | -1.76 |
| 3572 | Aida         | -1.76 |
| 3573 | Acads        | -1.76 |
| 3574 | Stmn4        | -1.76 |
| 3575 | Kpna3        | -1.76 |
| 3576 | Thrb         | -1.76 |
| 3577 | Zfp395       | -1.76 |
| 3578 | Slc30a9      | -1.76 |
| 3579 | Frm4a        | -1.76 |
| 3580 | Ap1g1        | -1.76 |
| 3581 | Ablim3       | -1.76 |
| 3582 | Acaa2        | -1.76 |
| 3583 | Lrp11        | -1.77 |
| 3584 | Sdha         | -1.77 |
| 3585 | Tulp4        | -1.77 |
| 3586 | Akt2         | -1.77 |
| 3587 | Pde8a        | -1.77 |
| 3588 | RGD1560108   | -1.77 |
| 3589 | Snhg11       | -1.77 |
| 3590 | Apmap        | -1.77 |
| 3591 | Ttc30a1      | -1.77 |
| 3592 | Acvr1        | -1.77 |
| 3593 | Ampd2        | -1.77 |
| 3594 | Fam172a      | -1.77 |
| 3595 | Gltpd1       | -1.77 |
| 3596 | Mfn2         | -1.77 |
| 3597 | Tmem176a     | -1.77 |
| 3598 | Snx6         | -1.77 |
| 3599 | Trak2        | -1.77 |
| 3600 | Nfya         | -1.77 |
| 3601 | LOC100360552 | -1.77 |
| 3602 | Stmn4        | -1.77 |
| 3603 | Cab39l       | -1.77 |
| 3604 | Add1         | -1.77 |

|      |            |       |
|------|------------|-------|
| 3605 | Limch1     | -1.77 |
| 3606 | Dhtkd1     | -1.77 |
| 3607 | Nat1       | -1.77 |
| 3608 | Asah1      | -1.77 |
| 3609 | Cdh5       | -1.77 |
| 3610 | Cdc23      | -1.77 |
| 3611 | Zwint      | -1.78 |
| 3612 | Micu1      | -1.78 |
| 3613 | Pcbd1      | -1.78 |
| 3614 | Bmf        | -1.78 |
| 3615 | Snx27      | -1.78 |
| 3616 | Mtmr12     | -1.78 |
| 3617 | LOC691921  | -1.78 |
| 3618 | Kdelr3     | -1.78 |
| 3619 | Foxn3      | -1.78 |
| 3620 | Nova1      | -1.78 |
| 3621 | Rab23      | -1.78 |
| 3622 | Spats2l    | -1.78 |
| 3623 | Lima1      | -1.78 |
| 3624 | Azi1       | -1.78 |
| 3625 | RGD1304982 | -1.78 |
| 3626 | RGD1308147 | -1.78 |
| 3627 | Cnep1r1    | -1.78 |
| 3628 | Rtn3       | -1.79 |
| 3629 | Fmr1       | -1.79 |
| 3630 | Etfb       | -1.79 |
| 3631 | Hif1an     | -1.79 |
| 3632 | Snx27      | -1.79 |
| 3633 | F3         | -1.79 |
| 3634 | Akr7a2     | -1.79 |
| 3635 | Creld1     | -1.79 |
| 3636 | Ppp1r12a   | -1.79 |
| 3637 | RGD1562284 | -1.79 |
| 3638 | Ptpns      | -1.79 |
| 3639 | Clmp       | -1.79 |
| 3640 | Tceal1     | -1.79 |
| 3641 | Tmem120b   | -1.79 |
| 3642 | Pds5b      | -1.79 |
| 3643 | Pds5b      | -1.79 |
| 3644 | Adrbk2     | -1.79 |
| 3645 | G3bp2      | -1.79 |



|      |            |       |
|------|------------|-------|
| 3646 | Wdpcp      | -1.79 |
| 3647 | Aaed1      | -1.79 |
| 3648 | Gcdh       | -1.79 |
| 3649 | Vps35      | -1.79 |
| 3650 | Fahd2a     | -1.8  |
| 3651 | Palmd      | -1.8  |
| 3652 | Trim2      | -1.8  |
| 3653 | Sike1      | -1.8  |
| 3654 | Rtkn       | -1.8  |
| 3655 | Lmf2       | -1.8  |
| 3656 | Pip5k1c    | -1.8  |
| 3657 | Mroh1      | -1.8  |
| 3658 | Letmd1     | -1.8  |
| 3659 | Stat1      | -1.8  |
| 3660 | Arhgef6    | -1.8  |
| 3661 | Tspan6     | -1.8  |
| 3662 | Pfkfb1     | -1.8  |
| 3663 | Cdkn2aipnl | -1.8  |
| 3664 | Stmn4      | -1.8  |
| 3665 | Ces1c      | -1.8  |
| 3666 | Prkaca     | -1.8  |
| 3667 | Pcdhac1    | -1.8  |
| 3668 | Perp       | -1.81 |
| 3669 | Acadm      | -1.81 |
| 3670 | Manba      | -1.81 |
| 3671 | Itpr1      | -1.81 |
| 3672 | Itpr1      | -1.81 |
| 3673 | Tmem18     | -1.81 |
| 3674 | C1qtnf5    | -1.81 |
| 3675 | Map4       | -1.81 |
| 3676 | Slc16a2    | -1.81 |
| 3677 | Rgn        | -1.81 |
| 3678 | Timp2      | -1.81 |
| 3679 | Mmp28      | -1.81 |
| 3680 | Mmp28      | -1.81 |
| 3681 | Itfg3      | -1.81 |
| 3682 | Atp1a2     | -1.81 |
| 3683 | Dnm3       | -1.81 |
| 3684 | Ndrp2      | -1.81 |
| 3685 | Ndrp2      | -1.81 |
| 3686 | Ndrp2      | -1.81 |

|      |            |       |
|------|------------|-------|
| 3687 | Ndrp2      | -1.81 |
| 3688 | Thsd1      | -1.81 |
| 3689 | Mmp15      | -1.81 |
| 3690 | Pcdha10    | -1.81 |
| 3691 | Pcdha13    | -1.81 |
| 3692 | Plin1      | -1.82 |
| 3693 | Vnn1       | -1.82 |
| 3694 | Pdcl       | -1.82 |
| 3695 | Eid1       | -1.82 |
| 3696 | Foxo1      | -1.82 |
| 3697 | S100pbb    | -1.82 |
| 3698 | Impdh1     | -1.82 |
| 3699 | Pon3       | -1.82 |
| 3700 | Itpr1      | -1.82 |
| 3701 | Mapk11     | -1.82 |
| 3702 | Pip5k1c    | -1.82 |
| 3703 | Lum        | -1.82 |
| 3704 | Ttc8       | -1.82 |
| 3705 | Lancl1     | -1.82 |
| 3706 | Gorasp1    | -1.82 |
| 3707 | Cmc1       | -1.82 |
| 3708 | Dlat       | -1.82 |
| 3709 | Scn2b      | -1.82 |
| 3710 | Iqsec2     | -1.82 |
| 3711 | B4galt4    | -1.82 |
| 3712 | Flt4       | -1.82 |
| 3713 | Ppp1r9b    | -1.82 |
| 3714 | Tmem9      | -1.82 |
| 3715 | Acacb      | -1.82 |
| 3716 | Rabl5      | -1.82 |
| 3717 | Cnpy4      | -1.82 |
| 3718 | Stmn4      | -1.82 |
| 3719 | Hmx1       | -1.82 |
| 3720 | RGD1309676 | -1.82 |
| 3721 | Pcdha11    | -1.82 |
| 3722 | Mir678     | -1.83 |
| 3723 | B3gnt8     | -1.83 |
| 3724 | Bmp7       | -1.83 |
| 3725 | Ctnnd1     | -1.83 |
| 3726 | Aif1l      | -1.83 |
| 3727 | Arhgef28   | -1.83 |

|      |              |       |
|------|--------------|-------|
| 3728 | Arhgef11     | -1.83 |
| 3729 | Pias3        | -1.83 |
| 3730 | Stx17        | -1.83 |
| 3731 | Sumf1        | -1.83 |
| 3732 | Klf15        | -1.83 |
| 3733 | Cxcl12       | -1.83 |
| 3734 | Mfap5        | -1.83 |
| 3735 | Tyms         | -1.83 |
| 3736 | Pfkfb1       | -1.83 |
| 3737 | Yipf6        | -1.83 |
| 3738 | Cuedc1       | -1.83 |
| 3739 | Nlgn2        | -1.83 |
| 3740 | Rpain        | -1.83 |
| 3741 | Arl4d        | -1.83 |
| 3742 | Acox1        | -1.83 |
| 3743 | Dhx9         | -1.83 |
| 3744 | Syt2         | -1.83 |
| 3745 | Tmem9        | -1.83 |
| 3746 | Mlxipl       | -1.83 |
| 3747 | Gpr146       | -1.83 |
| 3748 | Plau         | -1.83 |
| 3749 | Wwc2         | -1.83 |
| 3750 | Exoc8        | -1.83 |
| 3751 | Pcdha2       | -1.83 |
| 3752 | Pcdha1       | -1.83 |
| 3753 | Pcdha5       | -1.83 |
| 3754 | Pcdha8       | -1.83 |
| 3755 | Pcdha9       | -1.83 |
| 3756 | Hace1        | -1.84 |
| 3757 | Pyroxd2      | -1.84 |
| 3758 | Ap3s2        | -1.84 |
| 3759 | Zfp40        | -1.84 |
| 3760 | Stard5       | -1.84 |
| 3761 | Syt7         | -1.84 |
| 3762 | Gle1         | -1.84 |
| 3763 | B3galt1      | -1.84 |
| 3764 | Pdk1         | -1.84 |
| 3765 | Fbxo3        | -1.84 |
| 3766 | Zmpste24     | -1.84 |
| 3767 | LOC100912292 | -1.84 |
| 3768 | Vgll4        | -1.84 |

|      |           |       |
|------|-----------|-------|
| 3769 | Herc3     | -1.84 |
| 3770 | Sspn      | -1.84 |
| 3771 | Mfsd12    | -1.84 |
| 3772 | Dgcr2     | -1.84 |
| 3773 | Adcy3     | -1.84 |
| 3774 | Rapgef5   | -1.84 |
| 3775 | Ramp1     | -1.84 |
| 3776 | Acsbg1    | -1.84 |
| 3777 | Arhgef12  | -1.84 |
| 3778 | Ezh1      | -1.84 |
| 3779 | Lym7      | -1.84 |
| 3780 | Trappc1   | -1.84 |
| 3781 | Sorbs3    | -1.84 |
| 3782 | Ap3m1     | -1.84 |
| 3783 | Kif13b    | -1.84 |
| 3784 | Pcdha6    | -1.84 |
| 3785 | Lims1     | -1.85 |
| 3786 | Slc35f1   | -1.85 |
| 3787 | Rab11fip2 | -1.85 |
| 3788 | Zhx3      | -1.85 |
| 3789 | Fap       | -1.85 |
| 3790 | Fnbp1     | -1.85 |
| 3791 | Prnp      | -1.85 |
| 3792 | Elovl7    | -1.85 |
| 3793 | Lysmd3    | -1.85 |
| 3794 | Kif2c     | -1.85 |
| 3795 | Gfpt1     | -1.85 |
| 3796 | Fam21c    | -1.85 |
| 3797 | Cxcl12    | -1.85 |
| 3798 | Gpihbp1   | -1.85 |
| 3799 | Hadha     | -1.85 |
| 3800 | Snx12     | -1.85 |
| 3801 | Dlg1      | -1.85 |
| 3802 | Rilp      | -1.85 |
| 3803 | Tmem204   | -1.85 |
| 3804 | Tbcd      | -1.85 |
| 3805 | Stmn4     | -1.85 |
| 3806 | Nudt18    | -1.85 |
| 3807 | Slc4a4    | -1.85 |
| 3808 | Arhgap21  | -1.85 |
| 3809 | Efnb2     | -1.85 |

|      |            |       |
|------|------------|-------|
| 3810 | Mir145     | -1.85 |
| 3811 | Pcdha3     | -1.85 |
| 3812 | Pcdha7     | -1.85 |
| 3813 | Sgpl1      | -1.86 |
| 3814 | S100b      | -1.86 |
| 3815 | RGD1311021 | -1.86 |
| 3816 | Mcee       | -1.86 |
| 3817 | Ggt7       | -1.86 |
| 3818 | Kif16b     | -1.86 |
| 3819 | Celf3      | -1.86 |
| 3820 | Ankrd6     | -1.86 |
| 3821 | Manea      | -1.86 |
| 3822 | Trim32     | -1.86 |
| 3823 | Dcakd      | -1.86 |
| 3824 | Decr2      | -1.86 |
| 3825 | Aoc2-ps1   | -1.86 |
| 3826 | Akap11     | -1.86 |
| 3827 | Stmn4      | -1.86 |
| 3828 | Nipsnap1   | -1.86 |
| 3829 | Nt5dc2     | -1.86 |
| 3830 | Slc26a2    | -1.86 |
| 3831 | Pcdha4     | -1.86 |
| 3832 | Pald1      | -1.87 |
| 3833 | Specc1l    | -1.87 |
| 3834 | Tysnd1     | -1.87 |
| 3835 | Mrpl49     | -1.87 |
| 3836 | Slc22a18   | -1.87 |
| 3837 | Gnaq       | -1.87 |
| 3838 | Cercam     | -1.87 |
| 3839 | Fam126a    | -1.87 |
| 3840 | Strn       | -1.87 |
| 3841 | Slc39a9    | -1.87 |
| 3842 | Chga       | -1.87 |
| 3843 | Plin5      | -1.87 |
| 3844 | Klf7       | -1.87 |
| 3845 | Arhgef9    | -1.87 |
| 3846 | Pir        | -1.87 |
| 3847 | Rtn4r      | -1.87 |
| 3848 | Jup        | -1.87 |
| 3849 | Fbxl20     | -1.87 |
| 3850 | Tnfsf12    | -1.87 |

|      |         |       |
|------|---------|-------|
| 3851 | Ypel2   | -1.87 |
| 3852 | Dhx40   | -1.87 |
| 3853 | Hoxb7   | -1.87 |
| 3854 | Acad10  | -1.87 |
| 3855 | Meis1   | -1.87 |
| 3856 | Elovl2  | -1.87 |
| 3857 | Pcdha12 | -1.87 |
| 3858 | Sapcd1  | -1.88 |
| 3859 | Ube2l6  | -1.88 |
| 3860 | Gstm3   | -1.88 |
| 3861 | Fgf10   | -1.88 |
| 3862 | Lix1l   | -1.88 |
| 3863 | Dpyd    | -1.88 |
| 3864 | Tmem246 | -1.88 |
| 3865 | Erc1    | -1.88 |
| 3866 | Kcnh2   | -1.88 |
| 3867 | Hadhb   | -1.88 |
| 3868 | Pex6    | -1.88 |
| 3869 | Slc29a1 | -1.88 |
| 3870 | Atp2c1  | -1.88 |
| 3871 | Zbtb38  | -1.88 |
| 3872 | Abhd14b | -1.88 |
| 3873 | Cbr1    | -1.88 |
| 3874 | Mpp2    | -1.88 |
| 3875 | Myo1c   | -1.88 |
| 3876 | Anxa6   | -1.88 |
| 3877 | Arhgdig | -1.88 |
| 3878 | Akt3    | -1.88 |
| 3879 | Grifin  | -1.88 |
| 3880 | Scarb1  | -1.88 |
| 3881 | Ephx2   | -1.88 |
| 3882 | Pdgfrl  | -1.88 |
| 3883 | Rbl2    | -1.88 |
| 3884 | Uros    | -1.89 |
| 3885 | Isoc2b  | -1.89 |
| 3886 | Ndn     | -1.89 |
| 3887 | Acvr1c  | -1.89 |
| 3888 | Sardh   | -1.89 |
| 3889 | Pfn2    | -1.89 |
| 3890 | Pfn2    | -1.89 |
| 3891 | Cog6    | -1.89 |

|      |         |       |
|------|---------|-------|
| 3892 | Camk2n1 | -1.89 |
| 3893 | Rarg    | -1.89 |
| 3894 | Rarg    | -1.89 |
| 3895 | Zc3h7b  | -1.89 |
| 3896 | Fam49a  | -1.89 |
| 3897 | Ankmy2  | -1.89 |
| 3898 | Ptpn    | -1.89 |
| 3899 | Layn    | -1.89 |
| 3900 | Pigz    | -1.89 |
| 3901 | Pigz    | -1.89 |
| 3902 | Ctc1    | -1.89 |
| 3903 | Dpt     | -1.89 |
| 3904 | Nsd1    | -1.89 |
| 3905 | Fam213a | -1.89 |
| 3906 | Itfg1   | -1.89 |
| 3907 | Ppic    | -1.89 |
| 3908 | Dpp3    | -1.9  |
| 3909 | Cpa3    | -1.9  |
| 3910 | Mocs2   | -1.9  |
| 3911 | Lrrc40  | -1.9  |
| 3912 | Mansc1  | -1.9  |
| 3913 | Mical3  | -1.9  |
| 3914 | Pde3a   | -1.9  |
| 3915 | Cd320   | -1.9  |
| 3916 | L3hypdh | -1.9  |
| 3917 | Mre11a  | -1.9  |
| 3918 | Cbr1    | -1.9  |
| 3919 | Ccdc47  | -1.9  |
| 3920 | Wdr7    | -1.9  |
| 3921 | Rufy2   | -1.91 |
| 3922 | Ptpa    | -1.91 |
| 3923 | Per3    | -1.91 |
| 3924 | Macf1   | -1.91 |
| 3925 | Kif2c   | -1.91 |
| 3926 | Wwp1    | -1.91 |
| 3927 | Cpne3   | -1.91 |
| 3928 | Sema3d  | -1.91 |
| 3929 | Crebl2  | -1.91 |
| 3930 | Tll1    | -1.91 |
| 3931 | Kif3c   | -1.91 |
| 3932 | Cd276   | -1.91 |

|      |            |       |
|------|------------|-------|
| 3933 | Epm2aip1   | -1.91 |
| 3934 | Cdc27      | -1.91 |
| 3935 | Crebrf     | -1.91 |
| 3936 | Fig4       | -1.92 |
| 3937 | Fah        | -1.92 |
| 3938 | Hint3      | -1.92 |
| 3939 | Qk         | -1.92 |
| 3940 | B3gnt1     | -1.92 |
| 3941 | B3gnt1     | -1.92 |
| 3942 | Vav2       | -1.92 |
| 3943 | Kif5c      | -1.92 |
| 3944 | Cds2       | -1.92 |
| 3945 | Acss2      | -1.92 |
| 3946 | Gstm6      | -1.92 |
| 3947 | Prex2      | -1.92 |
| 3948 | Eogt       | -1.92 |
| 3949 | Ick        | -1.92 |
| 3950 | Trappc2    | -1.92 |
| 3951 | Fundc1     | -1.92 |
| 3952 | Tbl1x      | -1.92 |
| 3953 | Tmem50b    | -1.92 |
| 3954 | Parp14     | -1.92 |
| 3955 | RGD1305110 | -1.92 |
| 3956 | Pcdh7      | -1.92 |
| 3957 | Cln3       | -1.92 |
| 3958 | Cyb5b      | -1.92 |
| 3959 | Hint3      | -1.93 |
| 3960 | Nnat       | -1.93 |
| 3961 | Hsd17b12   | -1.93 |
| 3962 | Zfyve16    | -1.93 |
| 3963 | Decr1      | -1.93 |
| 3964 | Tmem55a    | -1.93 |
| 3965 | Zdhhc17    | -1.93 |
| 3966 | Kitlg      | -1.93 |
| 3967 | Akap6      | -1.93 |
| 3968 | Acadl      | -1.93 |
| 3969 | Abcg4      | -1.93 |
| 3970 | Elovl5     | -1.93 |
| 3971 | Extl3      | -1.93 |
| 3972 | Fdft1      | -1.93 |
| 3973 | Rab2b      | -1.93 |



|      |              |       |
|------|--------------|-------|
| 3974 | Ppp2r2c      | -1.93 |
| 3975 | Kiaa0895l    | -1.93 |
| 3976 | Ctif         | -1.93 |
| 3977 | Ctxn3        | -1.93 |
| 3978 | Rtn3         | -1.94 |
| 3979 | Ppp2r5b      | -1.94 |
| 3980 | Ppp2r5b      | -1.94 |
| 3981 | Slc27a3      | -1.94 |
| 3982 | Kcnn3        | -1.94 |
| 3983 | Tcf7l1       | -1.94 |
| 3984 | Dpp6         | -1.94 |
| 3985 | Rcan2        | -1.94 |
| 3986 | Cyyr1        | -1.94 |
| 3987 | Cdip1        | -1.94 |
| 3988 | Pea15        | -1.94 |
| 3989 | Ap4m1        | -1.94 |
| 3990 | Scara3       | -1.94 |
| 3991 | Erlin2       | -1.94 |
| 3992 | Aga          | -1.94 |
| 3993 | Cxxc5        | -1.94 |
| 3994 | Rufy2        | -1.95 |
| 3995 | Ech1         | -1.95 |
| 3996 | Fam57b       | -1.95 |
| 3997 | Dmbt1        | -1.95 |
| 3998 | Sh3glb2      | -1.95 |
| 3999 | Hrh3         | -1.95 |
| 4000 | Ptgfr        | -1.95 |
| 4001 | LOC100365008 | -1.95 |
| 4002 | Suox         | -1.95 |
| 4003 | Kitlg        | -1.95 |
| 4004 | Dync1h1      | -1.95 |
| 4005 | Adam23       | -1.95 |
| 4006 | Efhd1        | -1.95 |
| 4007 | Ap1s2        | -1.95 |
| 4008 | Cbr1         | -1.95 |
| 4009 | Sft2d2       | -1.95 |
| 4010 | Xpo7         | -1.95 |
| 4011 | Fto          | -1.95 |
| 4012 | Pcyox1l      | -1.95 |
| 4013 | Cpeb1        | -1.96 |
| 4014 | Kazald1      | -1.96 |

|      |           |       |
|------|-----------|-------|
| 4015 | Nnat      | -1.96 |
| 4016 | Nnat      | -1.96 |
| 4017 | Ubr1      | -1.96 |
| 4018 | Wdsub1    | -1.96 |
| 4019 | Cyp2j4    | -1.96 |
| 4020 | Clstn1    | -1.96 |
| 4021 | Dguok     | -1.96 |
| 4022 | Fkbp9     | -1.96 |
| 4023 | Nipa2     | -1.96 |
| 4024 | Appl2     | -1.96 |
| 4025 | Pecr      | -1.96 |
| 4026 | Tubb4a    | -1.96 |
| 4027 | Prkar2a   | -1.96 |
| 4028 | Usp22     | -1.96 |
| 4029 | Mfap3     | -1.96 |
| 4030 | Pm20d1    | -1.96 |
| 4031 | Gtf2i     | -1.96 |
| 4032 | Dcun1d4   | -1.96 |
| 4033 | Kdr       | -1.96 |
| 4034 | Kif13a    | -1.96 |
| 4035 | Spock1    | -1.96 |
| 4036 | Scgn      | -1.96 |
| 4037 | Eif4ebp2  | -1.97 |
| 4038 | Scube3    | -1.97 |
| 4039 | Calhm2    | -1.97 |
| 4040 | Acsm5     | -1.97 |
| 4041 | Rab3il1   | -1.97 |
| 4042 | Prkci     | -1.97 |
| 4043 | Prkar2b   | -1.97 |
| 4044 | Hyal1     | -1.97 |
| 4045 | Gpm6b     | -1.97 |
| 4046 | Cacnb3    | -1.97 |
| 4047 | Mlec      | -1.97 |
| 4048 | Nacad     | -1.97 |
| 4049 | Crmp1     | -1.97 |
| 4050 | Dnase2    | -1.97 |
| 4051 | Haus1     | -1.97 |
| 4052 | Haus1     | -1.97 |
| 4053 | Hspa12a   | -1.98 |
| 4054 | LOC361635 | -1.98 |
| 4055 | Nnat      | -1.98 |

|      |            |       |
|------|------------|-------|
| 4056 | Hipk3      | -1.98 |
| 4057 | RGD1309730 | -1.98 |
| 4058 | Mapk8ip1   | -1.98 |
| 4059 | Olfml3     | -1.98 |
| 4060 | Mab21l1    | -1.98 |
| 4061 | Bdh2       | -1.98 |
| 4062 | Pla2g2d    | -1.98 |
| 4063 | RGD1310769 | -1.98 |
| 4064 | Faim2      | -1.98 |
| 4065 | MGC109340  | -1.98 |
| 4066 | Acap2      | -1.98 |
| 4067 | Jade2      | -1.98 |
| 4068 | Abcc1      | -1.98 |
| 4069 | Thra       | -1.98 |
| 4070 | Adck3      | -1.98 |
| 4071 | Mpp7       | -1.98 |
| 4072 | Pgpep1     | -1.98 |
| 4073 | Dync1li2   | -1.98 |
| 4074 | Tspyl4     | -1.99 |
| 4075 | Hrh3       | -1.99 |
| 4076 | Tcaim      | -1.99 |
| 4077 | Prrg1      | -1.99 |
| 4078 | Rundc3a    | -1.99 |
| 4079 | Fmo1       | -1.99 |
| 4080 | Cntn2      | -1.99 |
| 4081 | Ebpl       | -1.99 |
| 4082 | Ttc5       | -1.99 |
| 4083 | Cog4       | -1.99 |
| 4084 | Tmem216    | -2    |
| 4085 | Sdhaf2     | -2    |
| 4086 | Ncs1       | -2    |
| 4087 | Abcd3      | -2    |
| 4088 | Ghr        | -2    |
| 4089 | Cmb1       | -2    |
| 4090 | Alg2       | -2    |
| 4091 | Slc1a7     | -2    |
| 4092 | Atf7       | -2    |
| 4093 | Ankrd52    | -2    |
| 4094 | Hoxc8      | -2    |
| 4095 | Stat1      | -2    |
| 4096 | Pdgfd      | -2    |

|      |            |       |
|------|------------|-------|
| 4097 | Mir3577    | -2    |
| 4098 | Crk        | -2    |
| 4099 | Eci1       | -2    |
| 4100 | Brinp2     | -2    |
| 4101 | Itpkb      | -2    |
| 4102 | Cd99l2     | -2    |
| 4103 | Bmi1       | -2    |
| 4104 | Slc25a42   | -2    |
| 4105 | Lhfp15     | -2.01 |
| 4106 | RGD1310127 | -2.01 |
| 4107 | Tmem135    | -2.01 |
| 4108 | Gpsm2      | -2.01 |
| 4109 | Mocs2      | -2.01 |
| 4110 | Clstn3     | -2.01 |
| 4111 | Tmem176b   | -2.01 |
| 4112 | Tmem176b   | -2.01 |
| 4113 | Tmem176b   | -2.01 |
| 4114 | Lynx1      | -2.01 |
| 4115 | Ankrd46    | -2.01 |
| 4116 | Igf1       | -2.01 |
| 4117 | Igf1       | -2.01 |
| 4118 | Fbxl17     | -2.01 |
| 4119 | Lman2l     | -2.01 |
| 4120 | Slc25a23   | -2.01 |
| 4121 | Jam2       | -2.01 |
| 4122 | Ccdc50     | -2.01 |
| 4123 | Sctr       | -2.01 |
| 4124 | Pex19      | -2.01 |
| 4125 | Cd99l2     | -2.01 |
| 4126 | Gatsl3     | -2.01 |
| 4127 | Akr1c19    | -2.01 |
| 4128 | Pard6g     | -2.01 |
| 4129 | Cyb5a      | -2.01 |
| 4130 | Plgrkt     | -2.02 |
| 4131 | Cpt1a      | -2.02 |
| 4132 | Plcg1      | -2.02 |
| 4133 | Hrh3       | -2.02 |
| 4134 | Nr2f1      | -2.02 |
| 4135 | Ctnna2     | -2.02 |
| 4136 | Tmem176b   | -2.02 |
| 4137 | Tmem176b   | -2.02 |

|      |            |       |
|------|------------|-------|
| 4138 | Gnai1      | -2.02 |
| 4139 | Mest       | -2.02 |
| 4140 | Mknk2      | -2.02 |
| 4141 | Tmeff2     | -2.02 |
| 4142 | Aplp2      | -2.02 |
| 4143 | Pak2       | -2.02 |
| 4144 | Pak2       | -2.02 |
| 4145 | Camk2g     | -2.02 |
| 4146 | Alb        | -2.02 |
| 4147 | Epha5      | -2.02 |
| 4148 | Pds5a      | -2.02 |
| 4149 | Sh2d4a     | -2.02 |
| 4150 | Ccdc127    | -2.03 |
| 4151 | Rab38      | -2.03 |
| 4152 | Uap111     | -2.03 |
| 4153 | Arfp1      | -2.03 |
| 4154 | Etfdh      | -2.03 |
| 4155 | Pgrmc2     | -2.03 |
| 4156 | Gnb4       | -2.03 |
| 4157 | Cdkn2c     | -2.03 |
| 4158 | Tmem176b   | -2.03 |
| 4159 | Tmem176b   | -2.03 |
| 4160 | Usp18      | -2.03 |
| 4161 | Snap91     | -2.03 |
| 4162 | Aplp2      | -2.03 |
| 4163 | Tmem164    | -2.03 |
| 4164 | Ece2       | -2.03 |
| 4165 | Nrsn1      | -2.03 |
| 4166 | Rnf14      | -2.03 |
| 4167 | Rgd1310049 | -2.04 |
| 4168 | Strbp      | -2.04 |
| 4169 | Hrh3       | -2.04 |
| 4170 | Clcn6      | -2.04 |
| 4171 | Fktn       | -2.04 |
| 4172 | Fkbp14     | -2.04 |
| 4173 | Srpk2      | -2.04 |
| 4174 | Dctn1      | -2.04 |
| 4175 | Vwf        | -2.04 |
| 4176 | Ifi2712b   | -2.04 |
| 4177 | Magt1      | -2.04 |
| 4178 | Magee1     | -2.04 |

|      |            |       |
|------|------------|-------|
| 4179 | Adamts2    | -2.04 |
| 4180 | Rgl1       | -2.04 |
| 4181 | RGD1312005 | -2.04 |
| 4182 | Entpd2     | -2.05 |
| 4183 | Fndc3b     | -2.05 |
| 4184 | Fam189b    | -2.05 |
| 4185 | Selenbp1   | -2.05 |
| 4186 | Gja5       | -2.05 |
| 4187 | Klhdc10    | -2.05 |
| 4188 | Timp3      | -2.05 |
| 4189 | Cs         | -2.05 |
| 4190 | Sdc2       | -2.05 |
| 4191 | Mtm1       | -2.05 |
| 4192 | Agr2       | -2.05 |
| 4193 | Meox2      | -2.05 |
| 4194 | Nudt12     | -2.05 |
| 4195 | Glb1l      | -2.05 |
| 4196 | Tcf12      | -2.05 |
| 4197 | Slc9a3r2   | -2.05 |
| 4198 | Mtmr6      | -2.05 |
| 4199 | Lgi3       | -2.05 |
| 4200 | Eci3       | -2.05 |
| 4201 | Cul4a      | -2.05 |
| 4202 | Pcdhac2    | -2.05 |
| 4203 | Dctn4      | -2.05 |
| 4204 | Sep-10     | -2.06 |
| 4205 | Agpat3     | -2.06 |
| 4206 | Nsdhl      | -2.06 |
| 4207 | Hrh3       | -2.06 |
| 4208 | Gpx7       | -2.06 |
| 4209 | Cacna2d1   | -2.06 |
| 4210 | Prkag2     | -2.06 |
| 4211 | Csad       | -2.06 |
| 4212 | Eml1       | -2.06 |
| 4213 | Elovl4     | -2.06 |
| 4214 | Gpd1       | -2.06 |
| 4215 | Marf1      | -2.06 |
| 4216 | Fmo3       | -2.06 |
| 4217 | Phlda3     | -2.06 |
| 4218 | Sccpdh     | -2.06 |
| 4219 | Bphl       | -2.06 |

|      |           |       |
|------|-----------|-------|
| 4220 | Dpep1     | -2.06 |
| 4221 | Mpc1      | -2.07 |
| 4222 | Zfp260    | -2.07 |
| 4223 | Zfp260    | -2.07 |
| 4224 | Pxmp4     | -2.07 |
| 4225 | Apip      | -2.07 |
| 4226 | Hrh3      | -2.07 |
| 4227 | Pdgfc     | -2.07 |
| 4228 | Klh9      | -2.07 |
| 4229 | Heyl      | -2.07 |
| 4230 | Cacna2d1  | -2.07 |
| 4231 | Cdk5      | -2.07 |
| 4232 | Atcay     | -2.07 |
| 4233 | Igf1      | -2.07 |
| 4234 | Igf1      | -2.07 |
| 4235 | Sqle      | -2.07 |
| 4236 | Acvr11    | -2.07 |
| 4237 | Itga11    | -2.07 |
| 4238 | Wrb       | -2.07 |
| 4239 | Sep-04    | -2.07 |
| 4240 | Marf1     | -2.07 |
| 4241 | Emp2      | -2.07 |
| 4242 | Sccpdh    | -2.07 |
| 4243 | Xpo1      | -2.07 |
| 4244 | Pdcd4     | -2.08 |
| 4245 | Sulf2     | -2.08 |
| 4246 | Ttc30b    | -2.08 |
| 4247 | Eif5a2    | -2.08 |
| 4248 | Cidec     | -2.08 |
| 4249 | Cacna2d1  | -2.08 |
| 4250 | Tmem106b  | -2.08 |
| 4251 | Csad      | -2.08 |
| 4252 | Cgref1    | -2.08 |
| 4253 | Mir770    | -2.08 |
| 4254 | Ncam1     | -2.08 |
| 4255 | Cilp      | -2.08 |
| 4256 | Sun1      | -2.08 |
| 4257 | Abcg3l1   | -2.08 |
| 4258 | Msr2      | -2.08 |
| 4259 | LOC363337 | -2.08 |
| 4260 | Echs1     | -2.09 |

|      |          |       |
|------|----------|-------|
| 4261 | Thrsp    | -2.09 |
| 4262 | Echs1    | -2.09 |
| 4263 | Hrh3     | -2.09 |
| 4264 | Ptger3   | -2.09 |
| 4265 | Lpar1    | -2.09 |
| 4266 | Cidec    | -2.09 |
| 4267 | Cidec    | -2.09 |
| 4268 | Cyb5r3   | -2.09 |
| 4269 | Sycp3    | -2.09 |
| 4270 | Galnt16  | -2.09 |
| 4271 | Map2     | -2.09 |
| 4272 | Kdelc2   | -2.09 |
| 4273 | Slc25a20 | -2.09 |
| 4274 | Lrp5     | -2.1  |
| 4275 | Snrpn    | -2.1  |
| 4276 | Syt17    | -2.1  |
| 4277 | Echdc1   | -2.1  |
| 4278 | Stxbp1   | -2.1  |
| 4279 | Sptan1   | -2.1  |
| 4280 | Pkia     | -2.1  |
| 4281 | Stxbp6   | -2.1  |
| 4282 | Entpd5   | -2.1  |
| 4283 | Aagab    | -2.1  |
| 4284 | Bhlhb9   | -2.1  |
| 4285 | Qdpr     | -2.1  |
| 4286 | Pofut1   | -2.11 |
| 4287 | Hspa12b  | -2.11 |
| 4288 | Hrh3     | -2.11 |
| 4289 | Coro2a   | -2.11 |
| 4290 | Lepr     | -2.11 |
| 4291 | Ptn      | -2.11 |
| 4292 | Rab3d    | -2.11 |
| 4293 | Cdon     | -2.11 |
| 4294 | Vat1     | -2.11 |
| 4295 | Zc3h11a  | -2.11 |
| 4296 | Lrpap1   | -2.11 |
| 4297 | Ccdc8    | -2.12 |
| 4298 | Dlg2     | -2.12 |
| 4299 | Tmem87b  | -2.12 |
| 4300 | Fam69b   | -2.12 |
| 4301 | Smo      | -2.12 |



|      |            |       |
|------|------------|-------|
| 4302 | Cxcl12     | -2.12 |
| 4303 | Ndufs1     | -2.12 |
| 4304 | Snx33      | -2.12 |
| 4305 | Armcx2     | -2.12 |
| 4306 | Bace2      | -2.12 |
| 4307 | Mar-02     | -2.12 |
| 4308 | Nqo2       | -2.12 |
| 4309 | Hand2      | -2.12 |
| 4310 | Ndst1      | -2.12 |
| 4311 | Rbp4       | -2.13 |
| 4312 | Psat1      | -2.13 |
| 4313 | Tjp1       | -2.13 |
| 4314 | Mllt11     | -2.13 |
| 4315 | Amigo1     | -2.13 |
| 4316 | Klhl7      | -2.13 |
| 4317 | Cyp51      | -2.13 |
| 4318 | Gata2      | -2.13 |
| 4319 | Gna11      | -2.13 |
| 4320 | Pja2       | -2.13 |
| 4321 | Col5a2     | -2.13 |
| 4322 | Dock6      | -2.13 |
| 4323 | Syn1       | -2.13 |
| 4324 | Pip4k2b    | -2.13 |
| 4325 | RGD1310110 | -2.13 |
| 4326 | Phyh       | -2.13 |
| 4327 | Zdhhc2     | -2.13 |
| 4328 | Mtss1l     | -2.13 |
| 4329 | Zfp423     | -2.13 |
| 4330 | Aifm2      | -2.14 |
| 4331 | Nkain4     | -2.14 |
| 4332 | Hrh3       | -2.14 |
| 4333 | Pde5a      | -2.14 |
| 4334 | Wls        | -2.14 |
| 4335 | Nbl1       | -2.14 |
| 4336 | Nxph4      | -2.14 |
| 4337 | Syn1       | -2.14 |
| 4338 | Dock9      | -2.14 |
| 4339 | Zcchc24    | -2.14 |
| 4340 | Ddo        | -2.15 |
| 4341 | Snurf      | -2.15 |
| 4342 | Secisbp2l  | -2.15 |

|      |          |       |
|------|----------|-------|
| 4343 | Fcrl2    | -2.15 |
| 4344 | Tmeff1   | -2.15 |
| 4345 | Copg1    | -2.15 |
| 4346 | Zhx1     | -2.15 |
| 4347 | Kcnk3    | -2.15 |
| 4348 | Pja2     | -2.15 |
| 4349 | Hibch    | -2.15 |
| 4350 | Cyp27a1  | -2.15 |
| 4351 | Ophn1    | -2.15 |
| 4352 | Dynlt3   | -2.15 |
| 4353 | Pank3    | -2.15 |
| 4354 | Pbx1     | -2.15 |
| 4355 | Slc25a30 | -2.15 |
| 4356 | Rcbtb2   | -2.15 |
| 4357 | Ankrd29  | -2.15 |
| 4358 | Snurf    | -2.16 |
| 4359 | Itga1    | -2.16 |
| 4360 | Tlx2     | -2.16 |
| 4361 | Notch3   | -2.16 |
| 4362 | Nuak1    | -2.16 |
| 4363 | Ehd3     | -2.16 |
| 4364 | Zfyve21  | -2.16 |
| 4365 | Dag1     | -2.16 |
| 4366 | Srebf1   | -2.16 |
| 4367 | Tep1     | -2.16 |
| 4368 | Ddah2    | -2.17 |
| 4369 | Vapb     | -2.17 |
| 4370 | Mcart1   | -2.17 |
| 4371 | Dnajc6   | -2.17 |
| 4372 | Tspan12  | -2.17 |
| 4373 | Scg3     | -2.17 |
| 4374 | Ddx6     | -2.17 |
| 4375 | Srebf1   | -2.17 |
| 4376 | Ebf1     | -2.17 |
| 4377 | Cisd3    | -2.17 |
| 4378 | Pbx1     | -2.17 |
| 4379 | Cers4    | -2.17 |
| 4380 | Pdgfra   | -2.17 |
| 4381 | Fam26e   | -2.18 |
| 4382 | Plcb3    | -2.18 |
| 4383 | Abhd12   | -2.18 |

|      |           |       |
|------|-----------|-------|
| 4384 | Scg5      | -2.18 |
| 4385 | Phgdh     | -2.18 |
| 4386 | Map1b     | -2.18 |
| 4387 | Nfib      | -2.18 |
| 4388 | Fhl5      | -2.18 |
| 4389 | Copg2     | -2.18 |
| 4390 | Cd36      | -2.18 |
| 4391 | Adcyap1r1 | -2.18 |
| 4392 | Adcyap1r1 | -2.18 |
| 4393 | Adcyap1r1 | -2.18 |
| 4394 | Xrcc6     | -2.18 |
| 4395 | Lrrc49    | -2.18 |
| 4396 | Figf      | -2.18 |
| 4397 | Tango2    | -2.18 |
| 4398 | Sorbs2    | -2.18 |
| 4399 | Wls       | -2.19 |
| 4400 | Eno2      | -2.19 |
| 4401 | Adcyap1r1 | -2.19 |
| 4402 | Adcyap1r1 | -2.19 |
| 4403 | Adcyap1r1 | -2.19 |
| 4404 | Eno2      | -2.19 |
| 4405 | Ttc3      | -2.19 |
| 4406 | Atp6v1a   | -2.19 |
| 4407 | Pik3r2    | -2.19 |
| 4408 | Anpep     | -2.2  |
| 4409 | Axl       | -2.2  |
| 4410 | Axl       | -2.2  |
| 4411 | Dhcr7     | -2.2  |
| 4412 | Pdhx      | -2.2  |
| 4413 | Ggta1p    | -2.2  |
| 4414 | Enpep     | -2.2  |
| 4415 | Setd7     | -2.2  |
| 4416 | Emcn      | -2.2  |
| 4417 | Lrrc17    | -2.2  |
| 4418 | Rbfox2    | -2.2  |
| 4419 | Dnal1     | -2.2  |
| 4420 | Irf6      | -2.2  |
| 4421 | Ddah2     | -2.21 |
| 4422 | Bicc1     | -2.21 |
| 4423 | Prkra     | -2.21 |
| 4424 | Stk39     | -2.21 |

|      |            |       |
|------|------------|-------|
| 4425 | Dnm1       | -2.21 |
| 4426 | Disp2      | -2.21 |
| 4427 | Agrn       | -2.21 |
| 4428 | Tob2       | -2.21 |
| 4429 | L2hgdh     | -2.21 |
| 4430 | Gls        | -2.21 |
| 4431 | Wdr6       | -2.21 |
| 4432 | Gcom1      | -2.21 |
| 4433 | RGD1305733 | -2.21 |
| 4434 | Aoc3       | -2.21 |
| 4435 | Nid2       | -2.21 |
| 4436 | Cdkl2      | -2.21 |
| 4437 | Mk1        | -2.21 |
| 4438 | Nipa1      | -2.22 |
| 4439 | Lipe       | -2.22 |
| 4440 | Pygb       | -2.22 |
| 4441 | Oxct1      | -2.22 |
| 4442 | C6         | -2.22 |
| 4443 | Cpt2       | -2.22 |
| 4444 | Serpina12  | -2.22 |
| 4445 | Rab15      | -2.22 |
| 4446 | Nr3c1      | -2.22 |
| 4447 | Kptn       | -2.23 |
| 4448 | Rxra       | -2.23 |
| 4449 | Ndr3       | -2.23 |
| 4450 | Hadh       | -2.23 |
| 4451 | Apc2       | -2.23 |
| 4452 | Smoc1      | -2.23 |
| 4453 | Enpp5      | -2.23 |
| 4454 | Adam10     | -2.23 |
| 4455 | Gng2       | -2.23 |
| 4456 | Wnt5a      | -2.23 |
| 4457 | Aktip      | -2.23 |
| 4458 | Asrgl1     | -2.24 |
| 4459 | Papss2     | -2.24 |
| 4460 | Dnajc10    | -2.24 |
| 4461 | Chgb       | -2.24 |
| 4462 | Adamtsl4   | -2.24 |
| 4463 | Hsd12      | -2.24 |
| 4464 | Arhgap5    | -2.24 |
| 4465 | Fut8       | -2.24 |

|      |            |       |
|------|------------|-------|
| 4466 | Phldb1     | -2.24 |
| 4467 | Adcy6      | -2.24 |
| 4468 | Klhl24     | -2.24 |
| 4469 | Dmtn       | -2.24 |
| 4470 | Cma1       | -2.24 |
| 4471 | Gng2       | -2.24 |
| 4472 | Apbb1      | -2.25 |
| 4473 | Fzd4       | -2.25 |
| 4474 | RGD1563072 | -2.25 |
| 4475 | RGD1563072 | -2.25 |
| 4476 | Chrm2      | -2.25 |
| 4477 | Scube1     | -2.25 |
| 4478 | Kank3      | -2.25 |
| 4479 | MGC116197  | -2.25 |
| 4480 | Adcy6      | -2.25 |
| 4481 | Dmd        | -2.25 |
| 4482 | Arhgef40   | -2.25 |
| 4483 | Nudcd3     | -2.25 |
| 4484 | Phox2a     | -2.26 |
| 4485 | Stam2      | -2.26 |
| 4486 | Car3       | -2.26 |
| 4487 | Tie1       | -2.26 |
| 4488 | Mtpn       | -2.26 |
| 4489 | Dgkb       | -2.26 |
| 4490 | Pde6d      | -2.26 |
| 4491 | Trim25     | -2.26 |
| 4492 | Gpx3       | -2.26 |
| 4493 | Myof       | -2.27 |
| 4494 | Ide        | -2.27 |
| 4495 | Cyp2t1     | -2.27 |
| 4496 | Nox4       | -2.27 |
| 4497 | Mrgprf     | -2.27 |
| 4498 | Edn3       | -2.27 |
| 4499 | Chpt1      | -2.27 |
| 4500 | Wdfy1      | -2.27 |
| 4501 | Adipoq     | -2.27 |
| 4502 | Nsg2       | -2.27 |
| 4503 | Slc36a1    | -2.27 |
| 4504 | Myh10      | -2.27 |
| 4505 | Aqp7       | -2.28 |
| 4506 | Sntb1      | -2.28 |

|      |            |       |
|------|------------|-------|
| 4507 | Adamts10   | -2.28 |
| 4508 | Crip2      | -2.28 |
| 4509 | Tmem218    | -2.28 |
| 4510 | Tmem98     | -2.28 |
| 4511 | Tomm40l    | -2.28 |
| 4512 | Ogdh       | -2.28 |
| 4513 | Aldh1a7    | -2.29 |
| 4514 | Klc1       | -2.29 |
| 4515 | Gulp1      | -2.29 |
| 4516 | Ctps2      | -2.29 |
| 4517 | Dmd        | -2.29 |
| 4518 | Pik3r1     | -2.3  |
| 4519 | Exoc4      | -2.3  |
| 4520 | Ikbip      | -2.3  |
| 4521 | Klc1       | -2.3  |
| 4522 | Pam        | -2.3  |
| 4523 | Zbtb16     | -2.3  |
| 4524 | Wdr13      | -2.3  |
| 4525 | Myh11      | -2.3  |
| 4526 | Ogn        | -2.3  |
| 4527 | Ii34       | -2.3  |
| 4528 | St5        | -2.31 |
| 4529 | Arrb1      | -2.31 |
| 4530 | Gsn        | -2.31 |
| 4531 | Kirrel     | -2.31 |
| 4532 | RGD1565355 | -2.31 |
| 4533 | Klc1       | -2.31 |
| 4534 | Fam219b    | -2.31 |
| 4535 | Clasp2     | -2.31 |
| 4536 | Kif3a      | -2.31 |
| 4537 | Lyplal1    | -2.31 |
| 4538 | Tmem130    | -2.31 |
| 4539 | Ogn        | -2.31 |
| 4540 | Slc27a1    | -2.31 |
| 4541 | Scoc       | -2.31 |
| 4542 | Ina        | -2.32 |
| 4543 | Rabgap1    | -2.32 |
| 4544 | Itgb5      | -2.32 |
| 4545 | Mcf2l      | -2.32 |
| 4546 | LOC291863  | -2.32 |
| 4547 | Prrx2      | -2.33 |

|      |            |       |
|------|------------|-------|
| 4548 | Map1a      | -2.33 |
| 4549 | Ifi44      | -2.33 |
| 4550 | Mbnl1      | -2.33 |
| 4551 | Rassf8     | -2.33 |
| 4552 | Itga7      | -2.33 |
| 4553 | rnf141     | -2.34 |
| 4554 | Nr2f2      | -2.34 |
| 4555 | Fam168a    | -2.34 |
| 4556 | Csnk2a1    | -2.34 |
| 4557 | Sfrp2      | -2.34 |
| 4558 | RGD1565355 | -2.34 |
| 4559 | Edem3      | -2.34 |
| 4560 | Mtmr9      | -2.34 |
| 4561 | Clec11a    | -2.35 |
| 4562 | Ddx17      | -2.35 |
| 4563 | Sec14l1    | -2.35 |
| 4564 | Pdim2      | -2.35 |
| 4565 | Lonp2      | -2.35 |
| 4566 | Ces1d      | -2.35 |
| 4567 | Reep3      | -2.36 |
| 4568 | Spopl      | -2.36 |
| 4569 | Adipor2    | -2.36 |
| 4570 | Cald1      | -2.36 |
| 4571 | Smc6       | -2.36 |
| 4572 | Kidins220  | -2.36 |
| 4573 | Nnmt       | -2.36 |
| 4574 | C2cd2      | -2.36 |
| 4575 | Col8a1     | -2.36 |
| 4576 | Atp1b1     | -2.36 |
| 4577 | Cdc42bpa   | -2.36 |
| 4578 | Loxl2      | -2.36 |
| 4579 | Abcg3l3    | -2.36 |
| 4580 | Tlr3       | -2.36 |
| 4581 | Ccnd1      | -2.37 |
| 4582 | Sult1a1    | -2.37 |
| 4583 | Cat        | -2.37 |
| 4584 | Tmx2       | -2.37 |
| 4585 | Gstm6l     | -2.37 |
| 4586 | Mme        | -2.37 |
| 4587 | Eps15      | -2.37 |
| 4588 | Me1        | -2.37 |

|      |              |       |
|------|--------------|-------|
| 4589 | Cadm1        | -2.37 |
| 4590 | Car5b        | -2.37 |
| 4591 | Klhl4        | -2.37 |
| 4592 | Hand1        | -2.37 |
| 4593 | Fn3krp       | -2.37 |
| 4594 | Rgs7         | -2.37 |
| 4595 | Prkar1b      | -2.37 |
| 4596 | Syt9         | -2.38 |
| 4597 | Ptdss2       | -2.38 |
| 4598 | Itch         | -2.38 |
| 4599 | Inmt         | -2.38 |
| 4600 | Gpr116       | -2.38 |
| 4601 | LOC100361444 | -2.38 |
| 4602 | Atp7a        | -2.38 |
| 4603 | Bex2         | -2.38 |
| 4604 | Prelp        | -2.38 |
| 4605 | Zadh2        | -2.38 |
| 4606 | Acat2        | -2.39 |
| 4607 | Ptgfrn       | -2.39 |
| 4608 | Snx10        | -2.39 |
| 4609 | Dpysl5       | -2.39 |
| 4610 | Col5a3       | -2.39 |
| 4611 | Mxd4         | -2.39 |
| 4612 | Trim44       | -2.4  |
| 4613 | Lifr         | -2.4  |
| 4614 | Gnl3l        | -2.4  |
| 4615 | RGD1561157   | -2.4  |
| 4616 | Caskin2      | -2.4  |
| 4617 | Bmpr1a       | -2.4  |
| 4618 | Rock1        | -2.4  |
| 4619 | Wasf2        | -2.41 |
| 4620 | Ston1        | -2.41 |
| 4621 | Ppm1f        | -2.41 |
| 4622 | Abca8a       | -2.41 |
| 4623 | Rnase4       | -2.41 |
| 4624 | Slmap        | -2.41 |
| 4625 | Smarca2      | -2.42 |
| 4626 | Sema3c       | -2.42 |
| 4627 | RGD1563325   | -2.42 |
| 4628 | Aldh6a1      | -2.42 |
| 4629 | Yap1         | -2.42 |



|      |            |       |
|------|------------|-------|
| 4630 | Bace1      | -2.42 |
| 4631 | Dmd        | -2.42 |
| 4632 | Tusc5      | -2.42 |
| 4633 | Nefh       | -2.42 |
| 4634 | Ehd2       | -2.43 |
| 4635 | Sbsn       | -2.43 |
| 4636 | Mapk3      | -2.43 |
| 4637 | Fads1      | -2.43 |
| 4638 | Tspan18    | -2.43 |
| 4639 | Camk2d     | -2.43 |
| 4640 | Aco1       | -2.43 |
| 4641 | Resp18     | -2.43 |
| 4642 | Gas7       | -2.43 |
| 4643 | Steap3     | -2.43 |
| 4644 | Mir143     | -2.43 |
| 4645 | Epb41l1    | -2.44 |
| 4646 | Sepp1      | -2.44 |
| 4647 | Sepp1      | -2.44 |
| 4648 | Stmn1      | -2.44 |
| 4649 | Mxra8      | -2.44 |
| 4650 | Dync1i1    | -2.44 |
| 4651 | Acad11     | -2.44 |
| 4652 | Nicn1      | -2.44 |
| 4653 | Ctdspl     | -2.44 |
| 4654 | Mrc2       | -2.44 |
| 4655 | Afap1      | -2.44 |
| 4656 | Pgm5       | -2.45 |
| 4657 | Ly6e       | -2.45 |
| 4658 | Crim1      | -2.45 |
| 4659 | Armex1     | -2.45 |
| 4660 | Armex1     | -2.45 |
| 4661 | Kcnmb1     | -2.45 |
| 4662 | Kif1b      | -2.46 |
| 4663 | Reck       | -2.46 |
| 4664 | Sec23a     | -2.46 |
| 4665 | Gnb5       | -2.46 |
| 4666 | Fzd2       | -2.46 |
| 4667 | Mir6321    | -2.46 |
| 4668 | Cbr4       | -2.46 |
| 4669 | Napb       | -2.47 |
| 4670 | RGD1309821 | -2.47 |

|      |          |       |
|------|----------|-------|
| 4671 | Slc31a1  | -2.47 |
| 4672 | Atl1     | -2.47 |
| 4673 | Dnm1l    | -2.47 |
| 4674 | Gmfb     | -2.47 |
| 4675 | Scarb2   | -2.47 |
| 4676 | Fads2    | -2.48 |
| 4677 | Isl1     | -2.48 |
| 4678 | Sv2c     | -2.48 |
| 4679 | Lrp6     | -2.48 |
| 4680 | Tef      | -2.48 |
| 4681 | Vmac     | -2.48 |
| 4682 | Fez1     | -2.48 |
| 4683 | Mar-01   | -2.48 |
| 4684 | Cd24     | -2.49 |
| 4685 | Clip3    | -2.49 |
| 4686 | Clip3    | -2.49 |
| 4687 | Smim1    | -2.49 |
| 4688 | Ptprn2   | -2.49 |
| 4689 | Maoa     | -2.49 |
| 4690 | Fstl1    | -2.49 |
| 4691 | Cbr3     | -2.49 |
| 4692 | Thra     | -2.49 |
| 4693 | Uhmk1    | -2.49 |
| 4694 | Nmnat2   | -2.49 |
| 4695 | Ebf2     | -2.49 |
| 4696 | Bmp6     | -2.49 |
| 4697 | Cdkn1c   | -2.5  |
| 4698 | Pc       | -2.5  |
| 4699 | Scn9a    | -2.5  |
| 4700 | Fam180a  | -2.5  |
| 4701 | Pdk4     | -2.5  |
| 4702 | Slc25a19 | -2.5  |
| 4703 | Rcbtb1   | -2.5  |
| 4704 | Cdkn1c   | -2.51 |
| 4705 | Nr1h3    | -2.51 |
| 4706 | Sulf1    | -2.51 |
| 4707 | Cby1     | -2.51 |
| 4708 | Glis2    | -2.51 |
| 4709 | Abcg3    | -2.51 |
| 4710 | Cdkn1c   | -2.52 |
| 4711 | Cend1    | -2.52 |

|      |          |       |
|------|----------|-------|
| 4712 | Cend1    | -2.52 |
| 4713 | Ddx58    | -2.52 |
| 4714 | Mfap2    | -2.52 |
| 4715 | Mturn    | -2.52 |
| 4716 | Kif5a    | -2.52 |
| 4717 | Hspa13   | -2.52 |
| 4718 | Aldoc    | -2.52 |
| 4719 | Cpd      | -2.52 |
| 4720 | Slc25a10 | -2.52 |
| 4721 | Slc29a4  | -2.52 |
| 4722 | Nap1l5   | -2.53 |
| 4723 | Rrm2b    | -2.53 |
| 4724 | Xiap     | -2.53 |
| 4725 | Aspn     | -2.53 |
| 4726 | Aspn     | -2.53 |
| 4727 | Rab3a    | -2.53 |
| 4728 | Fndc1    | -2.54 |
| 4729 | C1qtnf6  | -2.54 |
| 4730 | Pkhd1l1  | -2.54 |
| 4731 | Fam163a  | -2.54 |
| 4732 | Lmod1    | -2.54 |
| 4733 | Acbd5    | -2.54 |
| 4734 | Amph     | -2.54 |
| 4735 | Olfml1   | -2.55 |
| 4736 | Chrdl1   | -2.55 |
| 4737 | Prkg2    | -2.55 |
| 4738 | Gng3     | -2.56 |
| 4739 | Susd2    | -2.57 |
| 4740 | Ii33     | -2.57 |
| 4741 | Ddah1    | -2.57 |
| 4742 | Scrn1    | -2.57 |
| 4743 | Ppfibp1  | -2.57 |
| 4744 | Cxcl9    | -2.57 |
| 4745 | Mmp2     | -2.57 |
| 4746 | Cidea    | -2.57 |
| 4747 | Elovl6   | -2.58 |
| 4748 | Cadm3    | -2.58 |
| 4749 | Rmnd1    | -2.59 |
| 4750 | Rtn1     | -2.59 |
| 4751 | Cd2ap    | -2.59 |
| 4752 | Cdh19    | -2.59 |

|      |          |       |
|------|----------|-------|
| 4753 | Susd4    | -2.59 |
| 4754 | Add3     | -2.6  |
| 4755 | Pxdn     | -2.6  |
| 4756 | Nrep     | -2.6  |
| 4757 | Lrrn4cl  | -2.61 |
| 4758 | Nrp2     | -2.61 |
| 4759 | Dpysl2   | -2.61 |
| 4760 | Omd      | -2.61 |
| 4761 | Omd      | -2.61 |
| 4762 | Isoc1    | -2.61 |
| 4763 | Pde3b    | -2.62 |
| 4764 | Add3     | -2.62 |
| 4765 | Zeb2     | -2.62 |
| 4766 | Dhrs3    | -2.62 |
| 4767 | Atp6v0e2 | -2.62 |
| 4768 | Enpp2    | -2.62 |
| 4769 | Tspan8   | -2.62 |
| 4770 | Ppl      | -2.62 |
| 4771 | Slco2b1  | -2.63 |
| 4772 | Timp4    | -2.63 |
| 4773 | Mapt     | -2.63 |
| 4774 | Zeb1     | -2.63 |
| 4775 | Glg1     | -2.63 |
| 4776 | Elovl6   | -2.64 |
| 4777 | Creb3l2  | -2.64 |
| 4778 | Epb41l1  | -2.65 |
| 4779 | Gnas     | -2.65 |
| 4780 | Crot     | -2.65 |
| 4781 | Nfic     | -2.65 |
| 4782 | Ephx1    | -2.65 |
| 4783 | Ache     | -2.65 |
| 4784 | Itgbl1   | -2.65 |
| 4785 | Chrna7   | -2.66 |
| 4786 | Sbsn     | -2.66 |
| 4787 | Ctnnal1  | -2.66 |
| 4788 | Ngb      | -2.66 |
| 4789 | Tmem255a | -2.66 |
| 4790 | Tgfbr3   | -2.66 |
| 4791 | Tubb3    | -2.66 |
| 4792 | Plcb4    | -2.67 |
| 4793 | Arhgap29 | -2.67 |

|      |            |       |
|------|------------|-------|
| 4794 | Cyt11      | -2.67 |
| 4795 | Vps41      | -2.67 |
| 4796 | Adrb3      | -2.67 |
| 4797 | Gnao1      | -2.67 |
| 4798 | Sord       | -2.68 |
| 4799 | Snap25     | -2.68 |
| 4800 | Snap25     | -2.68 |
| 4801 | Snap25     | -2.68 |
| 4802 | Hmgcs1     | -2.68 |
| 4803 | Oxtr       | -2.68 |
| 4804 | Ramp2      | -2.68 |
| 4805 | RGD1310587 | -2.68 |
| 4806 | Pi16       | -2.69 |
| 4807 | Gda        | -2.69 |
| 4808 | Olfml2a    | -2.69 |
| 4809 | Aox3       | -2.69 |
| 4810 | Itgb4      | -2.69 |
| 4811 | Zfp521     | -2.69 |
| 4812 | Pcyox1     | -2.7  |
| 4813 | Ephx1      | -2.7  |
| 4814 | Rufy3      | -2.7  |
| 4815 | Ccnd2      | -2.71 |
| 4816 | Col14a1    | -2.71 |
| 4817 | Htr3b      | -2.71 |
| 4818 | Prrx1      | -2.71 |
| 4819 | Slc27a6    | -2.71 |
| 4820 | Nat8l      | -2.72 |
| 4821 | Fgfr1      | -2.72 |
| 4822 | Sh3pxd2a   | -2.73 |
| 4823 | Fxyd6      | -2.73 |
| 4824 | Mx1        | -2.73 |
| 4825 | Mx1        | -2.73 |
| 4826 | Colec12    | -2.73 |
| 4827 | Tm4sf4     | -2.74 |
| 4828 | Ccdc80     | -2.74 |
| 4829 | Mx1        | -2.74 |
| 4830 | Mx1        | -2.74 |
| 4831 | Mx1        | -2.74 |
| 4832 | Mx1        | -2.74 |
| 4833 | Tom1l2     | -2.74 |
| 4834 | MGC108823  | -2.74 |

|      |            |       |
|------|------------|-------|
| 4835 | Tek        | -2.75 |
| 4836 | Mis12      | -2.75 |
| 4837 | Angptl1    | -2.75 |
| 4838 | L1cam      | -2.76 |
| 4839 | Chp2       | -2.77 |
| 4840 | Sostdc1    | -2.77 |
| 4841 | Acadsb     | -2.78 |
| 4842 | Stmn3      | -2.78 |
| 4843 | Slc25a1    | -2.78 |
| 4844 | MGC108823  | -2.78 |
| 4845 | Slc22a3    | -2.79 |
| 4846 | RGD1565616 | -2.79 |
| 4847 | Ntn4       | -2.79 |
| 4848 | LOC691995  | -2.79 |
| 4849 | Gns        | -2.8  |
| 4850 | Gns        | -2.8  |
| 4851 | Scg2       | -2.8  |
| 4852 | Syngn3     | -2.8  |
| 4853 | Sep-08     | -2.8  |
| 4854 | Nr1d2      | -2.8  |
| 4855 | Col5a1     | -2.81 |
| 4856 | Agmo       | -2.81 |
| 4857 | Pfkfb3     | -2.81 |
| 4858 | Gdf10      | -2.81 |
| 4859 | Fbn1       | -2.82 |
| 4860 | Rab3c      | -2.82 |
| 4861 | Cbx6       | -2.82 |
| 4862 | Vamp1      | -2.83 |
| 4863 | Tmem14a    | -2.84 |
| 4864 | Mpo        | -2.84 |
| 4865 | C1qtnf2    | -2.84 |
| 4866 | Tub        | -2.85 |
| 4867 | Dkk2       | -2.85 |
| 4868 | Nrn1       | -2.85 |
| 4869 | Kif5b      | -2.85 |
| 4870 | Angptl2    | -2.86 |
| 4871 | Syp        | -2.86 |
| 4872 | Sbsn       | -2.87 |
| 4873 | Olr63      | -2.88 |
| 4874 | Ttl        | -2.88 |
| 4875 | Gpd1l      | -2.88 |

|      |          |       |
|------|----------|-------|
| 4876 | Sparc    | -2.88 |
| 4877 | Apba1    | -2.89 |
| 4878 | PCOLCE2  | -2.89 |
| 4879 | Tagln3   | -2.89 |
| 4880 | Zc2hc1a  | -2.9  |
| 4881 | Reep1    | -2.9  |
| 4882 | Abcd2    | -2.9  |
| 4883 | Nedd4    | -2.9  |
| 4884 | Cgnl1    | -2.9  |
| 4885 | Myrip    | -2.9  |
| 4886 | Synpo2   | -2.91 |
| 4887 | Sult4a1  | -2.91 |
| 4888 | Eln      | -2.91 |
| 4889 | Plxnd1   | -2.92 |
| 4890 | Drd2     | -2.92 |
| 4891 | Ppp1r12b | -2.92 |
| 4892 | Syt11    | -2.93 |
| 4893 | Pparg    | -2.93 |
| 4894 | Tgfb2    | -2.93 |
| 4895 | Ppp2r2b  | -2.93 |
| 4896 | Pparg    | -2.94 |
| 4897 | Chrb4    | -2.94 |
| 4898 | Tagln3   | -2.94 |
| 4899 | Tppp3    | -2.94 |
| 4900 | Golim4   | -2.95 |
| 4901 | Fam198b  | -2.95 |
| 4902 | Pparg    | -2.95 |
| 4903 | Rab6b    | -2.95 |
| 4904 | Col1a2   | -2.96 |
| 4905 | Col1a2   | -2.96 |
| 4906 | Tmem179  | -2.96 |
| 4907 | Lxn      | -2.97 |
| 4908 | Hmgcs2   | -2.97 |
| 4909 | Arvcf    | -2.97 |
| 4910 | Utrn     | -2.98 |
| 4911 | Dbp      | -2.98 |
| 4912 | Bche     | -2.98 |
| 4913 | Kifap3   | -2.98 |
| 4914 | Cadps    | -2.98 |
| 4915 | Slc10a4  | -2.98 |
| 4916 | Ldb2     | -2.98 |

|      |            |       |
|------|------------|-------|
| 4917 | Ndr4       | -2.98 |
| 4918 | Ndr4       | -2.98 |
| 4919 | Ndr4       | -2.98 |
| 4920 | Rit2       | -2.98 |
| 4921 | Palm       | -2.99 |
| 4922 | Ddc        | -2.99 |
| 4923 | Ddc        | -2.99 |
| 4924 | Ndr4       | -2.99 |
| 4925 | Tmod2      | -3    |
| 4926 | Ncald      | -3.01 |
| 4927 | Ddc        | -3.01 |
| 4928 | Evc        | -3.01 |
| 4929 | Ndr4       | -3.01 |
| 4930 | Scd        | -3.02 |
| 4931 | Gpr81      | -3.02 |
| 4932 | Cplx2      | -3.02 |
| 4933 | Ndr4       | -3.02 |
| 4934 | Atl3       | -3.03 |
| 4935 | Mettl7a    | -3.03 |
| 4936 | Nsg1       | -3.04 |
| 4937 | Sfrp4      | -3.04 |
| 4938 | Lgals12    | -3.05 |
| 4939 | Cd248      | -3.05 |
| 4940 | Cd248      | -3.05 |
| 4941 | Cd248      | -3.05 |
| 4942 | Kank2      | -3.05 |
| 4943 | Pcp4       | -3.06 |
| 4944 | Adh1       | -3.07 |
| 4945 | Ddr2       | -3.07 |
| 4946 | Scn7a      | -3.08 |
| 4947 | Agpat2     | -3.1  |
| 4948 | Acly       | -3.1  |
| 4949 | Tnfsf10    | -3.11 |
| 4950 | RGD1566243 | -3.11 |
| 4951 | Plscr4     | -3.11 |
| 4952 | Mmp14      | -3.11 |
| 4953 | Calcr1     | -3.12 |
| 4954 | Lrrc58     | -3.12 |
| 4955 | Pcp4       | -3.12 |
| 4956 | Acly       | -3.12 |
| 4957 | Akr1e2     | -3.12 |



|      |            |       |
|------|------------|-------|
| 4958 | Celf6      | -3.13 |
| 4959 | Rgs5       | -3.13 |
| 4960 | Aldh3a1    | -3.14 |
| 4961 | Elavl2     | -3.15 |
| 4962 | Pid1       | -3.15 |
| 4963 | Aldh1a3    | -3.16 |
| 4964 | Prkacb     | -3.16 |
| 4965 | Epb41l3    | -3.16 |
| 4966 | Cyb561     | -3.16 |
| 4967 | Slc18a2    | -3.18 |
| 4968 | Nfix       | -3.18 |
| 4969 | Nfia       | -3.19 |
| 4970 | Uchl1      | -3.19 |
| 4971 | Parva      | -3.2  |
| 4972 | Fgf1       | -3.2  |
| 4973 | Col1a1     | -3.21 |
| 4974 | Lpl        | -3.21 |
| 4975 | Ppp2r2b    | -3.21 |
| 4976 | Idh1       | -3.22 |
| 4977 | Gap43      | -3.22 |
| 4978 | Ntrk1      | -3.23 |
| 4979 | Rab3b      | -3.23 |
| 4980 | Alcam      | -3.26 |
| 4981 | Spock2     | -3.27 |
| 4982 | Tril       | -3.28 |
| 4983 | Lpin1      | -3.28 |
| 4984 | Htr3a      | -3.28 |
| 4985 | Ptrf       | -3.28 |
| 4986 | Tmem35     | -3.29 |
| 4987 | Doc2b      | -3.29 |
| 4988 | Th         | -3.3  |
| 4989 | Islr       | -3.3  |
| 4990 | Ntn1       | -3.31 |
| 4991 | RGD1309362 | -3.31 |
| 4992 | Col3a1     | -3.34 |
| 4993 | Twsg1      | -3.35 |
| 4994 | Antxr1     | -3.36 |
| 4995 | Sptbn1     | -3.36 |
| 4996 | Slc36a2    | -3.37 |
| 4997 | Rgs4       | -3.37 |
| 4998 | Fam129a    | -3.38 |

|      |            |       |
|------|------------|-------|
| 4999 | Fmo2       | -3.39 |
| 5000 | Syn2       | -3.41 |
| 5001 | Scara5     | -3.41 |
| 5002 | Gucy1a3    | -3.43 |
| 5003 | Thy1       | -3.44 |
| 5004 | Nek7       | -3.45 |
| 5005 | Nrp1       | -3.45 |
| 5006 | Stk32a     | -3.48 |
| 5007 | Fabp9      | -3.49 |
| 5008 | Syn2       | -3.49 |
| 5009 | Atp2b4     | -3.5  |
| 5010 | Ucp1       | -3.5  |
| 5011 | Stx2       | -3.51 |
| 5012 | Capn5      | -3.53 |
| 5013 | Syt1       | -3.55 |
| 5014 | Mgll       | -3.56 |
| 5015 | Dhcr24     | -3.57 |
| 5016 | Sult1d1    | -3.58 |
| 5017 | Fam13a     | -3.6  |
| 5018 | Calml4     | -3.61 |
| 5019 | Gpam       | -3.63 |
| 5020 | Rbp7       | -3.63 |
| 5021 | Wisp2      | -3.66 |
| 5022 | Vip        | -3.68 |
| 5023 | Ngfr       | -3.71 |
| 5024 | Prph       | -3.75 |
| 5025 | Syt4       | -3.76 |
| 5026 | Acaca      | -3.82 |
| 5027 | Stmn2      | -3.83 |
| 5028 | Fam111a    | -3.9  |
| 5029 | RGD1309534 | -3.91 |
| 5030 | Tns1       | -3.92 |
| 5031 | Dbh        | -3.93 |
| 5032 | Mx2        | -4    |
| 5033 | Ahnak      | -4.04 |
| 5034 | Pirt       | -4.04 |
| 5035 | Nefm       | -4.11 |
| 5036 | Avil       | -4.12 |
| 5037 | Nefl       | -4.12 |
| 5038 | Dpysl3     | -4.12 |
| 5039 | Sdpr       | -4.19 |

|      |            |       |
|------|------------|-------|
| 5040 | Acs1       | -4.23 |
| 5041 | Chrna3     | -4.29 |
| 5042 | RGD1566134 | -4.31 |
| 5043 | LOC259244  | -4.37 |
| 5044 | LOC298116  | -4.42 |
| 5045 | Slc6a2     | -4.42 |
| 5046 | Mup5       | -4.43 |
| 5047 | LOC259246  | -4.44 |
| 5048 | Obp3       | -4.44 |
| 5049 | Obp3       | -4.45 |
| 5050 | Obp3       | -4.46 |
| 5051 | Cd34       | -4.46 |
| 5052 | LOC259245  | -4.47 |
| 5053 | Cd34       | -4.48 |
| 5054 | Mup4       | -4.55 |
| 5055 | Mup4       | -4.59 |
| 5056 | Fasn       | -4.59 |
| 5057 | Pck1       | -4.64 |
| 5058 | LOC298111  | -4.92 |
| 5059 | Pnpla3     | -4.92 |
| 5060 | Scd1       | -4.93 |
| 5061 | Fkbp1b     | -4.95 |
| 5062 | Igfbp5     | -5.29 |
